1  
2  
3  
4  
5  
6  
7  
8  
9  
10  
11  
12  
13  
14  
15  
16  
17  
18  
19  
20  
21  
22  
23

**AC2P20 selectively kills *M. tuberculosis* at acidic pH by depleting free thiols**

Shelby J. Dechow<sup>1</sup>, Garry B. Coulson<sup>1</sup>, Michael W. Wilson<sup>2</sup>, Scott D. Larsen<sup>2</sup>, and Robert B. Abramovitch<sup>1\*</sup>

<sup>1</sup>Department of Microbiology and Molecular Genetics, Michigan State University, East Lansing, MI 48824. <sup>2</sup> Vahlteich Medicinal Chemistry Core, College of Pharmacy, University of Michigan, Ann Arbor, MI, 48109.

\*Corresponding Author:  
Robert Abramovitch  
E-mail: [abramov5@msu.edu](mailto:abramov5@msu.edu)  
Phone: (517) 884-5416  
Fax: (517) 353-8957

24

25 ***Abstract***

26 *Mycobacterium tuberculosis* (Mtb) senses and adapts to host immune cues as part of its pathogenesis. One  
27 environmental cue sensed by Mtb is the acidic pH of its host niche in the macrophage phagosome.  
28 Disrupting the ability of Mtb to sense and adapt to acidic pH has the potential to reduce survival of Mtb  
29 in macrophages. Previously, a high throughput screen of a ~220,000 compound small molecule library  
30 was conducted to discover chemical probes that inhibit Mtb growth at acidic pH. The screen discovered  
31 chemical probes that kill Mtb at pH 5.7 but are inactive at pH 7.0. In this study, AC2P20 was prioritized  
32 for continued study to test the hypothesis that it was targeting Mtb pathways associated with pH-driven  
33 adaptation. RNAseq transcriptional profiling studies showed AC2P20 modulates expression of genes  
34 associated with redox homeostasis. Gene enrichment analysis revealed that the AC2P20 transcriptional  
35 profile had significant overlap with a previously characterized pH-selective inhibitor, AC2P36. Like  
36 AC2P36, we show that AC2P20 kills Mtb by selectively depleting free thiols at acidic pH. Mass  
37 spectrometry studies show the formation of a disulfide bond between AC2P20 and reduced glutathione,  
38 supporting a mechanism where AC2P20 is able to deplete intracellular thiols and dysregulate redox  
39 homeostasis. The observation of two independent molecules targeting free thiols to kill Mtb at acidic pH  
40 further supports that Mtb has restricted redox homeostasis and sensitivity to thiol-oxidative stress at acidic  
41 pH.

42

43

## 44 ***Introduction***

45 Mtb pathogenesis is driven by its ability to exploit and adapt to the intracellular host  
46 environment. During pathogenesis, Mtb encounters a variety of stressors including nitrosative,  
47 oxidative, acidic pH, and hypoxic stress [1]. In response to these stresses, Mtb alters its physiology  
48 in order to survive the hostile macrophage environment and modulate expression of virulence  
49 genes critical for its pathogenicity. Acidic pH is an initial environmental cue that Mtb senses upon  
50 infection of the host macrophage [2,3]. For survival within the resting macrophage, Mtb inhibits  
51 fusion of the phagosome and lysosome and resides in a mildly acidic phagosome (pH 6.4) [4].  
52 Activation of the macrophage leads to phagosome acidification and Mtb resists this acid stress,  
53 maintaining a relatively neutral cytoplasmic pH, even at pH <5.0 [5-8]. In addition to expressing  
54 mechanisms to survive acid stress, Mtb also exhibits pH-and-carbon source dependent growth  
55 adaptations. Mtb will completely arrest its growth in minimal media buffered to pH 5.7 with  
56 glycerol as the sole carbon source [9]. During this growth arrest, Mtb exhibits carbon specificity,  
57 and will only arrest growth on glycolytic carbon sources (i.e. glucose and glycerol) [9]. However,  
58 when given specific carbon sources (i.e. phosphoenolpyruvate, pyruvate, acetate, oxaloacetate, and  
59 cholesterol), Mtb resuscitates its growth at pH 5.7 in minimal media, and thus, exhibits direct  
60 metabolic remodeling during pH stress [9]. Collectively, these studies show that in response to  
61 acidic pH, Mtb has multiple mechanisms in place whereby it alters its physiology for survival and  
62 virulence.

63 When Mtb is cultured at acidic pH or in macrophages, the bacterium has an imbalanced  
64 redox state with a more reduced cytoplasm [9,10], a phenomenon referred to as reductive stress  
65 [3,11]. It is hypothesized that acidic pH may cause redox imbalances due to adaptations of the  
66 electron transport chain that promote oxidative phosphorylation while maintaining cytoplasmic

67 pH homeostasis [3]. These adaptations could lead to an accumulation of reduced co-factors such  
68 as NADH/NADPH. Implications for this type of reductive stress included altered Mtb metabolism,  
69 slowed growth, and non-replicating persistence. Fatty acid synthesis is thought to help mitigate  
70 reductive stress via the oxidation of NADPH and is supported by the induction of genes associated  
71 with lipid metabolism and anaplerosis at low pH [2,3,9,12]. One of these induced genes is WhiB3,  
72 a regulatory protein that senses Mtb's intracellular redox state through its [4Fe-4S] cluster and acts  
73 to mitigate reductive stress [11,13,14]. WhiB3 is thought to counter this reductive stress via its  
74 role as a metabolic regulator, whereby it controls the anabolism of virulence lipids: poly- and  
75 diacyltrehalose (PAT/DAT), phthiocerol dimycocerosate (PDIM), and sulfolipids (SL-1) [14].  
76 Production of these methyl-branched polar lipids requires NADPH; therefore, WhiB3 helps  
77 alleviate reductive stress by channeling excess reductants into fatty acid synthesis [14]. This results  
78 in the re-oxidation of reducing equivalents needed to maintain intracellular redox homeostasis.  
79 Changes in central metabolism, including the induction of anaplerotic pathways driven by  
80 isocitrate lyases (*icl*) and phosphoenolpyruvate carboxykinase (*pckA*) at acidic pH [15], and the  
81 dependence on carbon sources that feed the anaplerotic node [9], may also provide metabolic  
82 flexibility required to balance redox homeostasis at acidic pH.

83 Mechanisms important for pH adaptation (i.e. metabolism, cytoplasmic pH-homeostasis,  
84 and redox homeostasis) present an attractive source of novel targetable physiologies for drug  
85 discovery. pH homeostasis can be targeted by compounds like the benzoxazinone, BO43, which  
86 inhibits the serine protease MarP, resulting in the disruption of intrabacterial pH homeostasis [16].  
87 Additionally, ionophores have also been discovered to kill Mtb at acidic pH [17,18]. Respiration  
88 has been shown to be important for maintaining pH-homeostasis [19,20]. Compounds targeting  
89 respiration include Bedaquiline (BDQ), a  $F_1F_0$ -ATP-synthase inhibitor, and the small molecule,



90 C10. BDQ has been shown to act as an ionophore and disrupt the Mtb transmembrane pH gradient  
91 [21], while C10 exhibits enhanced Mtb killing at acid stress [22]. Thiol-redox homeostasis also  
92 has implications as a targetable pH-dependent physiology. Auranofin depletes free thiols by  
93 targeting an essential thioredoxin reductase (TrxB2) [23,24]. Together, these results demonstrate  
94 the druggability of physiologies important for acidic pH-dependent adaptation.

95 PhoPR, a two-component regulatory system (TCS), is important for regulating Mtb  
96 virulence and intracellular survival [25,12,26]. Additionally, signaling from PhoPR has been  
97 shown to play an important role in pH adaptation [2,27,9]. Our lab previously conducted a reporter  
98 based, whole cell high-throughput screen (HTS) of > 220,000 small molecules for inhibitors of  
99 PhoPR signaling at acidic pH [28,29]. Compound activity was assessed in rich media buffered to  
100 pH 5.7 using a pH-inducible Mtb fluorescent reporter strain to identify either direct inhibitors of  
101 the PhoPR regulon or pH-selective inhibitors of Mtb growth. This screen successfully identified  
102 inhibitors of *phoPR*-dependent signaling, including the carbonic anhydrase (CA) inhibitor,  
103 ethoxzolamide (ETZ) [28]. This screen also identified compounds that selectively kill Mtb at pH  
104 5.7 but not pH 7.0 and do so independently of PhoPR. One of these compounds, called AC2P36  
105 (5-chloro-N-(3-chloro-4-methoxyphenyl)-2-methylsulfonylpyrimidine-4-carboxamide) [29],  
106 functions by directly depleting intracellular Mtb thiol pools, by forming covalent adducts with free  
107 thiols. Depletion of free thiols, interferes with redox buffering pathways and induces formation of  
108 cytoplasmic reactive oxygen species (ROS) at acidic pH, thus sensitizing Mtb to thiol-oxidative  
109 stress [29]. AC2P36 also selectively kills Mtb and potentiates the activity of TB drugs: isoniazid,  
110 clofazimine, and diamide. We hypothesize that reductive stress at acidic pH selectively sensitizes  
111 Mtb to thiol targeting activity of AC2P36. These results indicate that free thiols are a pH-selective  
112 target, and that Mtb sensitivity to killing is enhanced under thiol oxidative stress.

113 In this study, we report on a new chemical probe isolated from a prior screen, AC2P20 (N-  
114 1,3-benzothiazol-2-yl-2-[(4,6-dioxo-5-phenyl-1,4,5,6-tetrahydropyrimidin-2-yl)thio]acetamide)  
115 (Figure 1A), that selectively kills Mtb at acidic pH. AC2P20 was identified as a *phoPR*-  
116 independent, pH-selective inhibitor of Mtb growth. Through transcriptional profiling we observed  
117 that genes modulated by AC2P20 treatment significantly overlap with genes modulated by  
118 AC2P36 treatment. Although both compounds are structurally distinct, like AC2P36, AC2P20 also  
119 exhibits killing of Mtb at pH 5.7, disrupts thiol homeostasis by depleting intracellular free thiol  
120 pools, and increases reactive oxygen ROS production. Thus, AC2P20 is a second structurally  
121 unique pH-selective chemical probe that exhibits thiol-depletion as a mechanism-of-action for  
122 killing at acidic pH. This finding further reinforces the vulnerability of Mtb to perturbations of  
123 redox homeostasis at acidic pH.

124

## 125 **Experimental**

### 126 ***Bacterial Strains and Growth Conditions***

127 *M. tuberculosis* strains Erdman and CDC1551 and *M. smegmatis* strain mc<sup>2</sup>155 (expressing GFP  
128 from a replicating plasmid) were used in all experiments unless specified. Mtb was cultured in  
129 Middlebrook 7H9 media enriched with 10% oleic acid-albumin-dextrose-catalase (OADC), 0.05%  
130 Tween-80, and glycerol. Cultures were maintained in vented T-25 culture flasks and grown at 37  
131 °C and 5% CO<sub>2</sub>. To maintain a specific pH, 7H9 media was strongly buffered to pH 7.0 with 100  
132 mM 3-(N-morpholino)propanesulfonic acid (MOPS) or pH 5.7 with 100 mM 2-(N-  
133 morpholino)ethanesulfonic acid (MES). Mtb was grown to mid-late log phase (OD<sub>600</sub> 0.5-1.0)  
134 before exposure to buffered 7H9 for use in experiments detailed below. *M. smegmatis* cultures

135 were grown in identical 7H9 media conditions at a starting OD<sub>600</sub> 0.05 at 37°C in a shaking  
136 incubator (200 rpm).

137

### 138 ***Selection for AC2P20 resistant mutants***

139 Mtb CDC1551 and Mtb Erdman strains were grown to an OD<sub>600</sub> of 0.6-1.0, spun down, and  
140 resuspended in 7H9 media buffered to pH 5.7. Mtb cells were plated at 10<sup>9</sup> cells/mL on 7H10 agar  
141 media buffered to pH 5.7 and supplemented with 10 μM, 20μM or 40 μM AC2P20. Plates were  
142 incubated at 37°C for over 12 weeks without any significant isolated colonies appearing. This  
143 experiment was performed three times with similar results.

144

### 145 ***Transcriptional profiling and data analysis***

146 Mtb cultures were grown at 37°C and 5% CO<sub>2</sub> in standing T-25 culture flasks to an OD<sub>600</sub> of 0.5  
147 in 8 mL of 7H9 buffered media. Treatment conditions examined include i) 20μM AC2P20 at pH  
148 5.7 and ii) an equivalent volume of DMSO at pH 5.7 as the baseline control. Each culture was  
149 incubated for 24 hours and treatment conditions were conducted in two biological replicates.  
150 Following incubation, total bacterial RNA was extracted as previously described [2,9] and  
151 sequencing data was analyzed using SPARTA (ver. 1.0) [30]. Genes identified filtered based on  
152 log<sub>2</sub>CPM < 5 and log<sub>2</sub>FC < 1. A Chi-Square analysis with Yates Correction was conducted to test  
153 the statistical relationship between gene overlap with the AC2P36 transcriptional profile as  
154 described by Coulson *et al.* [29]. The RNAseq data has been deposited at the GEO database  
155 (Accession # GSE151884).

156

157 ***Half-maximal effective concentration (EC<sub>50</sub>) determination and spectrum of activity in other***  
158 ***mycobacteria***

159 Mtb cultures were incubated in buffered 7H9 media (pH 5.7 or pH 7.0) at a starting OD<sub>600</sub> of 0.2,  
160 with 200 uL aliquoted into 96-well microtiter assay plates (CoStar #3603). Cultures were treated  
161 with a 2.5-fold dose-response of AC2P20 (80 μM-0.13 μM) and incubated standing for 6 days at  
162 37 °C and 5% CO<sub>2</sub>, with bacterial growth assessed by optical density (OD<sub>600</sub>). Cultures treated  
163 with an equivalent volume of DMSO or 0.3 μM Rifampin were used as negative and positive  
164 controls, respectively. Each condition was performed in duplicate and representative of three  
165 individual experiments. EC<sub>50</sub> values were determined using GraphPad Prism software (ver. 7.0).  
166 AC2P20 activity against *M. smegmatis* was also performed in 96-well assay plates in 7H9 buffered  
167 media (pH 7.0 or 5.7). *M. smegmatis* cultures were seeded at a starting OD<sub>600</sub> of 0.05 with 200 uL  
168 aliquoted into each well. An 8-point 2.5-fold dilution series starting at 80 μM was conducted and  
169 cultures were incubated for 3 days with shaking (100 rpm). Plates were read for GFP fluorescence.

170

171 ***Mycobactericidal activity of AC2P20***

172 Mtb was initially cultured in 7H9 media (pH 5.7 or 7.0) at a starting OD<sub>600</sub> of 0.2 in 96-well assay  
173 plates. Cultures were treated with a 2.5-fold dose-response of AC2P20 (80 μM-0.33 μM). An  
174 equivalent volume of DMSO was included as a control. Each treatment condition was conducted  
175 in triplicate and incubated for 7 days. Following incubation, treated wells were serially diluted in  
176 1X Phosphate-Buffered Saline (PBS) and plated for colony forming units (CFUs) on 7H10 agar  
177 plates supplemented with 10% OADC and glycerol. Bactericidal activity was determined by  
178 comparing CFUs from the initial inoculum to CFUs following treatment.

179

180 ***Cytoplasmic pH-homeostasis***

181 Mtb washed with PBS (pH 7.0) was labelled with Cell Tracker 5'-chloromethylfluorescein  
182 diacetate (CMFDA) and analyzed using methods previously described [31]. Mtb treated with  
183 AC2P20 in PBS (pH 5.7) was assayed for cytoplasmic pH changes over the course of 24-hours.  
184 Excitation ratio results were converted to pH via a standard curve generated using Nigericin-  
185 treated Mtb in buffers of known pH. Treated Mtb results were then compared to the DMSO and  
186 Nigericin negative and positive controls, respectively.

187

188 ***Measurement of endogenous reactive oxygen species***

189 CellROX Green fluorescent dye (Invitrogen) was used to detect accumulation of endogenous  
190 reactive oxygen species (ROS) in Mtb as previously reported [29,32]. Mtb grown to mid-late log  
191 phase was pelleted and re-suspended at a starting OD<sub>600</sub> of 0.5 in 5 mL of buffered 7H9 media (pH  
192 5.7 or 7.0) lacking catalase. Cultures prepared in duplicate were treated with two separate  
193 concentrations of AC2P20 (2  $\mu$ M and 20  $\mu$ M) and incubated for 24 hours at 37 °C. Following  
194 treatment, cultures were incubated with 5 mM CellROX Green (Thermo Fisher) for 1 hour at 37  
195 °C and then washed twice with 1X PBS + 0.05% Tween80. Washed cells were resuspended in 0.6  
196 mL 1X PBS and aliquoted into triplicate wells in 96-well microtiter plates. Wells were measured  
197 for fluorescence and optical density, with fluorescence being subsequently normalized to cell  
198 growth for ROS analysis. AC2P36 (2  $\mu$ M and 20  $\mu$ M) and equivalent volumes of DMSO served  
199 as positive and baseline controls, respectively.

200

201

202

203 ***Detecting intracellular free thiol pools***

204 Mtb grown in 7H9 OAD media lacking catalase was inoculated at a starting OD<sub>600</sub> of 0.25 in 8 mL  
205 of buffered 7H9 OAD media (pH 5.7 or 7.0) also lacking catalase. Cultures were prepared in  
206 duplicate and treated with either DMSO, 2 μM AC2P20, 20 μM AC2P20, 20 μM AC2P36, or 20  
207 μM auranofin. Treated cultures were incubated for 24 hours at 37 °C, normalized by OD<sub>600</sub>, and  
208 washed twice in 1X PBS supplemented with 0.05% Tyloxapol. Cells were resuspended in 0.75  
209 mL of thiol assay buffer (100 mM potassium phosphate pH 7.4, and 1 mM EDTA) and lysed by  
210 bead beating for 2 minutes at room temperature. Supernatants were removed and saved for analysis  
211 using the Cayman Thiol Detection Assay Kit (Caymen Chemical) as previously described [29].  
212 Thiol concentrations were measured in (nM) against a glutathione standard.

213

214 ***Mass Spectrometry***

215 Mass spectrometry was used to detect the formation of AC2P20 adducts. Aqueous solutions of 80  
216 μM AC2P20 were prepared separately and incubated with either reduced glutathione (100 μM),  
217 N-acetylcysteine (100 μM), or hydrogen peroxide (100 μM) for 1 hour at room temperature in  
218 Tris-HCl buffer (pH 5.7, 7.0, or 8.5). Samples were analyzed using the Waters Xevo G2-XS QTof  
219 mass spectrometer (Milford, MA, USA) in both positive and negative electrospray ionization (ESI)  
220 modes. Samples were run with the following ion source parameters: capillary voltage, 2 kV;  
221 sampling cone, 35 V; source temperature, 100°C; desolvation temperature, 350°C; cone gas flow,  
222 25 L/h; desolvation gas flow, 600 L/h. Ultra-performance liquid chromatography (UPLC), using  
223 water and acetonitrile as solvents, was carried out for the chromatographic separation of  
224 compounds. The LC parameters were as follows: flow rate, 0.2 mL/min; water/acetonitrile solvent

225 gradient, 50/50 for 2 min. Mass analysis was performed at <1,500 Da. This experiment was  
226 repeated twice in duplicate with similar results seen at both positive and negative ESI.

227

## 228 **Results**

229 *AC2P20 exhibits pH-dependent growth inhibition of M. tuberculosis.* Two high throughput  
230 screens (HTS) using Mtb fluorescent reporters were conducted in order to detect inhibitors of two  
231 separate Mtb two-component regulatory systems (TCS): DosRST and PhoPR [28,29,33,34]. A  
232 chemical library of >220,000 small molecules was previously screened, with compound hits being  
233 defined as those that inhibited reporter fluorescence or Mtb growth. These compounds were further  
234 classified as TCS target inhibitors or growth inhibitors. The screens only differed in the reporter  
235 strain used and the pH of the medium, which was neutral or acidic in the DosRST and PhoPR  
236 inhibitor screens, respectively. Comparing growth inhibiting hits from these two screens identified  
237 a subset of compounds that selectively inhibited Mtb growth at acidic pH independent of PhoPR  
238 signaling. These compounds were classified as pH-selective growth inhibitors if they exhibited  
239 >50% growth inhibition at acidic pH and < 10% inhibition at neutral pH. AC2P20 (N-1,3-  
240 benzothiazol-2-yl-2-[(4,6-dioxo-5-phenyl-1,4,5,6-tetrahydropyrimidin-2-yl)thio]acetamide)  
241 ([Figure 1A](#)) exhibited >5-fold selectivity at acidic pH and was characterized as one of these pH-  
242 selective inhibitors of Mtb growth. The pH-dependent activity of AC2P20 was confirmed by  
243 determining its half-maximal effective concentration (EC<sub>50</sub>). Mtb treated with an 8-point dose-  
244 response of AC2P20 for six days at pH 5.7 results in dose-dependent growth inhibition with an  
245 EC<sub>50</sub> of 4.3 μM, however, has a >10-fold higher EC<sub>50</sub> of ~60 μM at pH 7.0 ([Figure 1B](#)). AC2P20  
246 also exhibits mycobacterial selectivity for Mtb compared to *M. smegmatis*, which has an EC<sub>50</sub> >  
247 80 μM at acidic pH and does not exhibit growth inhibitory activity at neutral pH ([Figure S1A](#)).

248 Time-dependent and concentration-dependent killing assays were conducted to define whether  
249 AC2P20 is bactericidal or bacteriostatic. Mtb treated with 20  $\mu$ M AC2P20 exhibits pH-selective  
250 inhibition of Mtb growth in acidic conditions and results in approximately 2-log fold reduction in  
251 CFUs over 5 days (Figure 1C). In contrast, DMSO controls and AC2P20 treatment in neutral  
252 conditions have no impact on growth. The concentration-dependent killing assay shows that  
253 AC2P20 is bactericidal at  $\sim$ 32  $\mu$ M and bacteriostatic at 12  $\mu$ M (Figure 1D). Cytoplasmic pH was  
254 measured to determine whether AC2P20 functions as an ionophore. Treatment with AC2P20 does  
255 not modulate the cytoplasmic pH of Mtb compared to the nigericin positive control (Figure S1B).  
256 Together, these data show that AC2P20 activity is pH-dependent, bactericidal, and does not alter  
257 Mtb cytoplasmic pH homeostasis.

258

259 ***AC2P20 induces a thiol oxidative stress response similar to AC2P36.*** To isolate resistant mutants  
260 and thereby find potential targets for AC2P20,  $10^9$  Mtb cells were plated on 7H10 agar media  
261 buffered to pH 5.7 containing 10  $\mu$ M, 20  $\mu$ M or 40  $\mu$ M AC2P20. Despite several weeks of  
262 incubation each time at 37°C, no spontaneous mutants were isolated from multiple rounds of  
263 screening for resistant mutants to AC2P20. Following our resistance screening attempts,  
264 transcriptional profiling was conducted to define Mtb physiologies targeted following AC2P20  
265 treatment. Mtb CDC1551 cultures were prepared in rich media (pH 5.7) and treated with 20 $\mu$ M  
266 AC2P20 or DMSO control for 24 hours. Mtb treated with AC2P20 caused induction of 156 genes  
267 (>2-fold,  $q < 0.05$ ) and repression of 81 genes (>2-fold,  $q < 0.05$ ) (Figure 2A, Table S1). Using  
268 MycoBrowser [35] to classify gene function, we found that the functional pathway most induced  
269 by AC2P20 (excluding conserved hypotheticals) was intermediary metabolism and respiration  
270 (Figure 2B, Table S1A, Table S1B). Differentially induced genes included genes involved in sulfur



271 metabolism (*cysT*, *sirA*, *mec*), transcriptional regulation of the stress response (*sigH*, *sigB*, *rshA*),  
272 and redox homeostasis (*katG*, *trxBI*, *trxC*) (Figure 2C, Table S1B). Notably, differentially  
273 regulated genes from AC2P20 treated cells overlapped with differential gene expression profiles  
274 previously characterized for the pH-selective Mtb growth inhibitor, AC2P36 [29]. Gene  
275 enrichment analysis showed a statistically significant overlap between groups AC2P20 and  
276 AC2P36 differentially expressed genes ( $p < 0.0001$ ) (Figure 2C). Based on RNAseq data and the  
277 gene enrichment analysis, both AC2P36 and AC2P20 exhibit a transcriptional profile indicative  
278 of redox and thiol-oxidative stress. For example, both transcriptomes show induction of the  
279 alternative sigma factor *sigH* regulon which plays a central role in regulating thiol-oxidative stress  
280 during Mtb pathogenesis [36-38]. *sigH* is responsible for regulating genes involved in thiol  
281 metabolism including thioredoxin (*trxC*), thioredoxin reductases (*trxBI*, *trxB2*), and cysteine  
282 biosynthesis and sulfate transport (*cysO*, *cysM*, *cysA*, *cysW*, *cysT*). Additionally, *sigH*-regulated  
283 *moeZ* is induced in both transcriptomes, which is involved in sulfation of enzymes and plays a  
284 dual role in molybdopterin biosynthesis and *cysO* activation[39]. While the *sigH* regulon exhibits  
285 a direct response to thiol-oxidative stress, it is also highly induced under oxidative stress  
286 conditions[36]. In addition, non-*sigH* regulated oxidative stress responsive genes include *katG*  
287 (catalase-peroxidase), *thiX* (a thioredoxin), and *furA* (transcriptional regulator), which are  
288 upregulated in both AC2P20 and AC2P36. Interestingly, *Rv0560c*, a methyltransferase, is the most  
289 upregulated gene in Mtb treated with AC2P20, AC2P36, or C10 [22,29]. *Rv0560c* is induced in  
290 mutants resistant to a cyano-substituted fused pyrido-benzimidazole, known as compound 14, and  
291 provides resistance by methylating and inactivating compound 14 [40]. *Rv0560c* is not directly  
292 upregulated by the *sigH* regulon or oxidative stress, but rather by salicylate [41], and may be  
293 involved in the synthesis of redox cycling agents [42-44]. Therefore, induction of thiol-

294 homeostasis metabolism genes and *katG* in response to AC2P20 treatment suggests an increased  
295 need for the generation of low molecular weight thiols, which are important for detoxification of  
296 toxic reactive oxygen species (ROS) and maintaining redox homeostasis in Mtb.

297         Despite significant overlap between the AC2P20 and AC2P36-treated regulons, there are  
298 pathways that are distinctly different in the transcriptional profiling comparisons. Classification of  
299 gene function for the 180 AC2P36-induced genes (>2-fold,  $q < 0.05$ ) showed that the functional  
300 category most induced (excluding conserved hypotheticals) was intermediary metabolism and  
301 respiration, the same as AC2P20. However, major differences were noted between categories of  
302 both induced gene sets for AC2P20 and AC2P36. For example, induction of lipid metabolism  
303 genes comprised roughly 3.33% of the total genes induced by AC2P36 compared to 12.82% for  
304 AC2P20 (Figure 2B, Figure S2A). Noticeably, AC2P20 appeared to upregulate several mycolic  
305 acid biosynthesis pathway and operon genes (*fas*, *acpM*, *kasA*, *accD6*) (Figure S2B). In contrast,  
306 these genes were repressed following AC2P36 treatment. Other lipid metabolism genes not  
307 observed in AC2P20 transcriptional data, but actively repressed by AC2P36 include *scoA/B*,  
308 *accD1*, *Rv3087*, and *fadE35* [29]. Additionally, transcriptional profiling showed that methylcitrate  
309 synthase and methylcitrate dehydratase genes (*prpC* and *prpD*, respectively) were oppositely  
310 modulated in both regulons; AC2P20 repressed *prpC/D* expression while their expression was  
311 induced by AC2P36 (Figure S2B). Other functional categories that saw large quantitative changes  
312 between both transcriptional profiles include cell wall and cell wall processes and virulence,  
313 detoxification and adaptation. Fewer cell wall and cell wall processes genes were induced by  
314 AC2P36 compared to AC2P20, while the number of virulence, detoxification and adaptation  
315 functional genes were increased following AC2P36 treatment (Figure S2A). The transcriptional  
316 differences observed between both regulons demonstrates that despite the shared similarities in

317 regulation of thiol-redox homeostasis and regulatory genes, distinct differences exist between how  
318 pathways are modulated following AC2P20 and AC2P36, with lipid metabolism being most  
319 notable.

320

321 ***AC2P20 forms an adduct with the low molecular weight thiol, GSH.*** Although AC2P36 and  
322 AC2P20 have distinct structures, both compounds contain a similar thiol-containing pyrimidine  
323 group. In AC2P36, it is thought that the methylsulfone moiety acts as an electron-withdrawing  
324 group which allows a thiolate anion to undergo nucleophilic attack on the C-2 carbon of the  
325 pyrimidine ring in order to release methanesulfinic acid or methanesulfinate (Figure S1C) [29].  
326 This interaction is thought to result in the formation of a sulfide bond and depletion of available  
327 free thiols. Indeed, heteroaromatic sulfones have been recently described as tunable agents for  
328 cysteine-reactive profiling [45,46]. Based on these observations with AC2P36, and the noted  
329 similarity with the thiol-containing pyrimidine group, we hypothesized that AC2P20 may have a  
330 similar mechanism of action and undergo covalent modification of free thiols. To test this  
331 hypothesis, 80 $\mu$ M AC2P20 was incubated with 100 $\mu$ M reduced glutathione (GSH) for one hour  
332 in basic, neutral, and acidic conditions and analyzed via mass spectrometry. Incubation of AC2P20  
333 with GSH resulted in the formation of an adduct at pH 5.7 with an exact molecular weight of ~529  
334 Da (Figure 3A, Figure 3C, Figure S5). There is also adduct formation in neutral and basic  
335 conditions (Figure S3A, Figure S3B) although with lower peak intensity. AC2P20 incubated with  
336 DMSO does not appear to fragment in the absence of GSH in any of these conditions. (Figure 3B,  
337 Figure S3C, Figure S3D). In the positive ESI mode (Figure 3C), a neutral fragment of 129 Da is  
338 lost from the adduct with a peak seen at ~401 Da, consistent with a loss of the glutamate fragment  
339 from GSH [47]. Fragmentation of AC2P20 is also observed when incubated with GSH at pH 5.7,

340 with peaks at ~222 Da, ~206 Da, ~194 Da, and ~178 Da aligning with possible fragments of the  
341 pyrimidine group of AC2P20 (Figure S5). The peak observed at ~391 Da is a mass spectrometry  
342 plasticizer and common contaminant that can be used for mass calibration [48]. We also looked at  
343 N-acetylcysteine (NAC), a derivative of GSH, and its ability to form an adduct with AC2P20. A  
344 peak was observed at ~384 Da, aligning with the formation of an AC2P20-NAC adduct (Figures  
345 S4A, Figure S5). Interestingly, higher peak intensities of these adducts were observed at neutral  
346 and basic conditions (Figure S4B, Figure S4C). This is possibly due to NAC having a pKa ~9.5,  
347 and therefore favoring the adduct reaction with AC2P20 under these conditions. Together, these  
348 findings support that AC2P20 reacts with low molecular weight thiols and thiol groups.  
349 Additionally, we looked at whether AC2P20 still form an adduct with GSH in the presence of the  
350 oxidant, H<sub>2</sub>O<sub>2</sub>. It was thought that H<sub>2</sub>O<sub>2</sub> may cause the formation of intermediate sulfenic acid and  
351 oxidize GSH, resulting in the formation of glutathione (GSSG) [49]. After incubating AC2P20  
352 with both GSH and H<sub>2</sub>O<sub>2</sub>, we still observed disulfide bond formation between AC2P20 and GSH,  
353 indicating that GSSG is probably not being produced (Figure S4D). These results suggest that  
354 AC2P20 is capable of forming a disulfide bond with low molecular weight thiols.

355

356 ***AC2P20 depletes free thiols and causes an accumulation in ROS in Mtb at acidic pH.*** Given that  
357 an adduct is able to form between AC2P20 and GSH, we sought to test the ability of AC2P20 to  
358 deplete free thiols in Mtb. For this assay, Mtb was treated with AC2P20 (2 μM and 20 μM) in both  
359 acidic and neutral conditions for 24 hours. Auranofin (20 μM) was used as a positive control  
360 because it inhibits Mtb's thioredoxin reductase, TrxB2, thereby disrupting thiol- and redox-  
361 homeostasis[23]. AC2P36 (20 μM) was also included in the assay to compare thiol depleting  
362 activities of both compounds. Following AC2P20 treatment, a statistically significant reduction in

363 free thiol concentrations was observed intracellularly in Mtb at pH 5.7 where free thiols are  
364 reduced by ~2.8-fold to ~133nM compared to the DMSO vehicle control at ~380 nM (Figure 4A).  
365 As expected, we also see free thiol depletion in Mtb following treatment with both positive  
366 controls, supporting the observation seen with AC2P20. In contrast to Auranofin, AC2P20  
367 treatment at neutral pH does not exhibit any statistically significant reduction in free thiols,  
368 supporting the pH-selective activity of this compound. Interestingly, AC2P36 does exhibit some  
369 activity in neutral conditions. This is possibly due to AC2P36 still exhibiting some growth  
370 inhibitory activity at neutral pH at ~30  $\mu$ M, whereas AC2P20 requires much higher concentrations  
371 (~60  $\mu$ M) to see a similar inhibitory effect.

372 Depletion of total free thiols will result in disrupted redox homeostasis and therefore may  
373 result in enhanced ROS accumulation. To test this hypothesis, we conducted an assay measuring  
374 intracellular ROS production in Mtb. Mtb was incubated with 2  $\mu$ M and 20  $\mu$ M AC2P20 for 24  
375 hours, treated with CellROX fluorescent dye for 1 hour, and then assayed for relative fluorescence  
376 and optical density. AC2P36 (2  $\mu$ M and 20  $\mu$ M) was included as the positive control, because it  
377 has previously been shown to accumulate intracellular ROS following treatment. At acidic pH, 20  
378  $\mu$ M AC2P20 exhibits ~3-fold increase in intracellular ROS production compared to DMSO (Figure  
379 4B). AC2P20 (20  $\mu$ M) also increases ROS accumulation ~3-fold greater in acidic conditions  
380 compared to neutral pH, where there is little ROS accumulation compared to DMSO. AC2P36 (20  
381  $\mu$ M) also increases ROS production ~2-fold at pH 5.7, which is consistent with previous  
382 observations. These data support a mechanism whereby enhanced ROS accumulation can be  
383 driven by pH stress and is further exacerbated by AC2P20 treatment.

384

385

## 386 *Discussion*

387           Based on the chemical structure of AC2P20 and the adduct it forms with GSH at pH 5.7,  
388 we propose a reaction model where the benzothiazole-mercaptoacetamide group covalently  
389 modifies free thiols, forming stable adducts. Shown here is a potential mechanism for the  
390 generation of adducts observed by mass spectrometry (Figure 3A, Figure 3C). Disulfide bond  
391 formation between GSH (307.32 Da) and the free benzothiazole-mercaptoacetamide group  
392 (223.29 Da) results in a molecule mass of 529 Da, which can be observed in both positive and  
393 negative ESI modes (Figure 5A, Figure S5). Loss of the neutral glutamate fragment from the  
394 AC2P20-GSH adduct results in a peak at 401 Da (ESI+). We suspect AC2P20 may be undergoing  
395 hydrolysis, however, we do not observe the phenyl-dioxypyrimidine fragment (204 Da). We do  
396 observe a fragmented phenyl-dioxypyrimidine group at 178 Da which may be due to the sample's  
397 molecules breaking into charged fragments during mass spectrometry. The absence of a 204 Da  
398 fragment may also suggest that adduct formation could be occurring via a different chemical  
399 process. However, the observation of an adduct supports that the formation of disulfide bonds  
400 between AC2P20 and other thiol-containing molecules could be occurring in Mtb (Figure 5B).

401           Although, both AC2P20 and AC2P36 function by depleting free thiols, the two scaffolds  
402 are distinctly different and engage glutathione (GSH) in different ways. AC2P36 is itself an  
403 electrophile, by virtue of the reactive methanesulfonyl moiety on the pyrimidine. GSH can add  
404 directly to AC2P36 on the pyrimidine, followed by elimination of the excellent leaving group  
405 methanesulfinic acid[29]. On the other hand, AC2P20 is not itself reactive to GSH in an analogous  
406 fashion, as evidenced by a lack of MS ion for a direct adduct of GSH to the pyrimidine dione  
407 moiety. Instead, AC2P20 has to get hydrolyzed to the free thiol, after which it forms a disulfide

408 with GSH. Therefore, AC2P20 and AC2P26 have different chemical mechanisms of action, and  
409 the GSH adducts are chemically distinct (*e.g.* disulfide vs thiopyrimidine).

410 Redox homeostasis represents a potentially important Mtb vulnerability at acidic pH. Mtb  
411 experiences reductive stress during hypoxia and at acidic pH [10]. Genes important for mitigating  
412 redox stress are shown to be directly influenced by acid stress; therefore, disruption of redox  
413 homeostasis results in the loss of Mtb protection against acid stress [10]. Furthermore, direct  
414 perturbations to either redox-homeostasis or pH-homeostasis results in decreased drug tolerance  
415 and enhanced Mtb killing [50]. Indeed, chloroquine has recently been shown to kill Mtb *in vivo* by  
416 targeting redox homeostasis [50] and auranofin also shows promising antimycobacterial activity  
417 [23,51]. Furthermore, agents targeting respiration may similarly have activity by promoting redox  
418 imbalance. Thus, targeting redox-homeostasis represents an important new approach to treating  
419 TB. Like AC2P36, we have discovered a second, albeit novel, pH-selective compound (AC2P20)  
420 that directly targets free thiols to perturb redox homeostasis. Both AC2P36 and AC2P20 deplete  
421 free thiol pools and increase intracellular ROS as part of their killing mechanisms. Interestingly,  
422 AC2P20 depletes less free thiols than AC2P36, but has a greater increase in intracellular ROS.  
423 This suggests that although both appear to target Mtb free thiols, there are differences in their  
424 mechanisms. One hypothesis is that release of the phenyl-dioxypyrimidine group could also be  
425 targeting a secondary unknown Mtb physiology, possibly explaining the higher ROS increase that  
426 is observed compared to AC2P36 (Figure 4B). Both compounds also form adducts with the low  
427 molecular weight thiol, GSH; however, there are major chemical scaffold differences. AC2P36  
428 captures thiols with the release of methylsulfinate while AC2P20 is cleaved to generate  
429 benzothiazole-mercaptoacetamide, which then goes on to form disulfide bonds. Although  
430 AC2P20 and AC2P36 compounds are structurally unique and have distinct mechanisms-of-action,



431 they do exhibit similar physiological effects on Mtb, supporting the conclusion that thiol redox  
432 homeostasis is specifically vulnerable to inhibition at acidic pH.

433         Several studies in Mtb show a link between low pH- and oxidative stress responses  
434 [7,9,29,50,52]. At acidic pH *in vitro*, Mtb exhibits a more reduced cytoplasm and a shift from  
435 glycolysis to fatty acid synthesis [9]. This metabolic remodeling is thought to occur in order to  
436 generate more oxidized cofactors to mitigate reductive stress. However, a more reduced cytoplasm  
437 in Mtb may also play a role in protecting Mtb against oxidative stress. A recent study comparing  
438 the RNAseq profiles of reduced MSH redox potential ( $E_{MSH}$ -reduced), intraphagosomal Mtb, and  
439 pH stress supports this claim and shows that  $E_{MSH}$ -reduced transcriptome has significant overlap  
440 with the pH-regulon[50]. When we compare the  $E_{MSH}$ -reduced, intraphagosomal Mtb, and pH  
441 stress regulons with AC2P20 and AC2P36 transcriptional profiles, we again see overlap in redox  
442 sensitive genes (i.e. *katG*, *trxB2*, and *whiB3*) which are important for protection against oxidative  
443 stress.

444         While both AC2P20 and AC2P36 share these similar gene induction characteristics, there  
445 are differences in specific thiol-related genes. For example, methionine synthesis (i.e. *metK*, *metA*,  
446 *metC*) appears modulated by AC2P36 treatment, but induction of these genes is absent in AC2P20  
447 transcriptional data. Likewise, AC2P20 strongly induces sulfate reduction via APS (*cysH*, *nirA*),  
448 however, these genes are not modulated by AC2P36. These differences may reflect differences in  
449 how these compounds sequester free thiols and which free thiols in particular are being modified.  
450 While mycothiol is the most abundant free thiol in Mtb (present in millimolar amounts) [53], it is  
451 plausible AC2P20 targets other low molecular weight thiols such as ergothioneine (ERG) [32]  
452 or gamma-glutamylcysteine (GGC) [54]. Our mass spectrometry data also supports AC2P20 may  
453 be generally targeting free thiols, forming adducts with both GSH and NAC, which would indicate



454 that 1) AC2P20 can target a thiol group in general, and 2) it can directly target a cysteine derivative.  
455 Further profiling experiments would need to be undertaken to determine in which molecular  
456 contexts AC2P20 targets free thiols and indeed, other related molecules are being developed as  
457 tools for cysteine-reactive profiling [45,46].

458

## 459 **Conclusions**

460 The discovery of two independent molecules selectively killing Mtb at acidic pH by  
461 depleting free thiols provides further support for our hypothesis that Mtb is highly sensitive to thiol  
462 homeostasis stress at acidic pH and this pathway is a valuable new target for TB drug discovery.  
463 AC2P20 or AC2P36 in their present state, will not likely make useful drugs, as they could react  
464 with host thiols and thus be neutralized prior to reaching Mtb or could be cytotoxic. However,  
465 they independently point the way to further efforts to target this pathway. Indeed, the thioredoxin  
466 reductase inhibitor auranofin is in early clinical trials to treat TB and acts, as shown here, similarly  
467 functions by depleting free thiols, by a distinct, indirect mechanism. Several groups are pursuing  
468 compounds that have enhanced killing at acidic pH but have mostly focused on bacterial pH-  
469 homeostasis [16-18]. This new work further validates targeting thiol homeostasis as an alternative  
470 target to kill Mtb at acidic pH. Other chemotypes, such as auranofin, that do so indirectly are likely  
471 the most promising route. However, it could be possible to develop the compounds related to  
472 AC2P20 or AC2P36 into prodrugs that are activated by a Mtb specific enzyme, thus releasing the  
473 thiol-reactive warhead selectively inside the bacterial cell. Notably, for both AC2P20 and AC2P36  
474 we could not isolate resistant mutants. This is consistent with the compounds having a broad target  
475 (free thiols) and not a specific protein, where resistant mutants could be selected. Therefore, it is

476 possible that should a compound targeting free thiols be developed, the evolution of resistance  
477 may be slower as compared to a traditional antibiotic.

478 In conclusion, our findings have uncovered a novel thiol-targeting chemical probe,  
479 AC2P20. AC2P20, in combination with AC2P36, can be classified as a new class of compounds  
480 that render Mtb especially sensitive to changes in thiol homeostasis at acidic pH. Further  
481 experiments to examine the mechanism of this sensitivity can be undertaken using AC2P20 or  
482 AC2P36 as chemical probes. For example, using TN-seq, identification of mutants that become  
483 sensitive to AC2P20 and AC2P36 at a neutral pH or have enhanced sensitivity at acidic pH, may  
484 reveal key functional pathways required for maintaining thiol-homeostasis.

485

486

#### 487 **Conflicts of Interest**

488 R.B.A. is the founder and owner of Tarn Biosciences, Inc., a company that is working to develop  
489 new TB drugs.

490

#### 491 **Acknowledgements**

492 We thank Christopher Colvin and Javiera Ortiz for technical assistance on the high throughput  
493 screening and cytoplasmic pH assays, respectively. Research on this project was supported grants  
494 from the NIH-NIAID to RBA (U54AI057153, R01AI116605, R21AI105867) and  
495 AgBioResearch.

496

497

498

499 **Author Contributions**

500 S.J.D., G.B.C., and R.B.A. conceived the project. S.J.D performed the time-dependent and  
501 concentration-dependent killing assays, RNAseq analysis, mass spectrometry, free thiol assay, and  
502 ROS assay. G.B.C. conducted the initial characterization studies including Mtb and *M. smegmatis*  
503 EC<sub>50</sub> assays and the RNAseq experiment. M.W.W. and S.D.L. contributed to mass spectrometry  
504 analysis and proposed mechanism. S.J.D. and R.B.A. wrote the manuscript.

505

506

507 **Figure legends**

508 **Figure 1. AC2P20 inhibits Mtb growth in a pH-dependent manner.**

509 A) The chemical structure of AC2P20 ((N-1,3-benzothiazol-2-yl-2-[(4,6-dioxo-5-phenyl-1,4,5,6-  
510 tetrahydropyrimidin-2-yl)thio]acetamide)

511 B) Mtb growth is inhibited in a dose-dependent manner when treated with AC2P20 at pH 5.7 and  
512 exhibits an EC<sub>50</sub> of 4.3 μM following six days of treatment. Treatment with AC2P20 at pH 7.0  
513 Mtb requires concentrations >60 μM to see growth inhibitory effects.

514 C) Mtb treated with 20 μM of AC2P20 and grown in buffered 7H9 media (pH 5.7) for 5 days  
515 shows time-dependent killing as indicated by ~100-fold reduction in viability compared to the  
516 DMSO control. Time-dependent killing is not observed in neutral conditions.

517 D) Mtb was treated with a dose-response of AC2P20 at pH 5.7 for 7 days, then assessed for  
518 dose-dependent killing by plating for colony-forming units (CFUs). The dotted line indicates the  
519 CFUs plated on Day 0.

520

521 **Figure 2. AC2P20 treatment promotes a thiol-oxidative and redox stress response.**

522 A) Mtb differential gene expression data after being treated for 24 hours with 20 μM AC2P20 at  
523 pH 5.7. Genes indicated include those involved in sulfur metabolism, transcriptional regulation,  
524 and redox homeostasis. Statistically significant genes ( $q < 0.05$ ) are highlighted in red.

525 B) A pie chart depicting the functional classification breakdown of significantly induced genes  
526 (>2-fold,  $q < 0.05$ ) following the analysis of AC2P20-treated Mtb RNA-seq profile.

527 C) Heatmap comparing 16 upregulated genes (between AC2P20 and AC2P36 at pH 5.7 that are  
528 involved in sulfur metabolism, transcriptional regulation, and redox homeostasis . Genes were  
529 annotated with the H37Rv genome.

530 D) Venn diagrams comparing upregulated and downregulated gene overlap (>2-fold,  $q < 0.05$ )  
531 between AC2P20-treated and AC2P36-treated Mtb <sup>29</sup>.

532

533 **Figure 3. AC2P20 forms adducts with free thiols at acidic pH.**

534 A) AC2P20 was incubated in Tris-HCl buffer, pH 5.7 with reduced glutathione (GSH) for one  
535 hour. An AC2P20-GSH adduct (~528 Da) was confirmed via mass spectrometry. Samples were  
536 run in duplicate and observed in negative ESI mode.

537 B) In the absence of GSH, AC2P20 incubated with DMSO does not fragment at pH 5.7. Only the  
538 parent molecule is observable at a molecular weight of ~409 Da. Samples were run in duplicate  
539 and observed in negative ESI mode.

540 C) AC2P20-GSH adduct formation at pH 5.7 (~530 Da) was also observed in positive ESI mode,  
541 as well as adduct loss of the glutamate fragment (~401 Da) and subsequent fragmentation of the  
542 AC2P20 molecule and its pyrimidine fragments. Samples were run in duplicate.

543

544 **Figure 4. AC2P20 depletes free thiols and induces intracellular ROS accumulation.**

545 A) Treatment of Mtb with AC2P20 leads to a pH-dependent decrease in free thiols. Free thiol  
546 depletion is observed at pH 5.7 with AC2P20 treatment. AC2P36 is a pH-dependent chemical  
547 probe known to deplete free thiol pools and serves as a positive control. Statistical significance  
548 was calculated using a two-way ANOVA (\* $p < 0.05$ ).

549 B) ROS accumulate under AC2P20 treatment at acidic conditions. Mtb treatment with  
550 AC2P20 leads to a pH-dependent increase in intracellular reactive oxygen species (ROS). ROS  
551 was detected using a final concentration of 5  $\mu\text{m}$  fluorescent dye, CellROX Green, and normalized

552 to an OD<sub>595</sub>. DMSO was used as a control. Statistical significance was calculated using a one-way  
553 ANOVA (\*p<0.05)

554

555 **Figure 5. Proposed mechanism for AC2P20 adduct formation.**

556 A) Proposed reaction mechanism for the formation of a disulfide bond between AC2P20 and GSH  
557 at pH 5.7.

558 B) Proposed stable covalent bond formation between AC2P20 and free thiols in Mtb during redox  
559 cycling.

560

561 **Supplemental Figures:**

562 **S1A.** Dose-response curve for AC2P20 inhibition of *M. smegmatis* GFP fluorescence.

563 **S1B.** AC2P20 does not modulate Mtb cytoplasmic pH at pH 5.7. DMSO and Nigericin served as  
564 negative and positive controls, respectively.

565 **S1C.** The chemical structure of AC2P36 (5-chloro-N-(3-chloro-4-methoxyphenyl)-2-  
566 methylsulfonylpyrimidine-4-carboxamide) [29].

567 **S2A.** A pie chart depicting the functional classification breakdown of significantly induced genes  
568 (>2-fold, q < 0.05) following the analysis of AC2P36-treated Mtb RNA-seq profile.

569 **S2B.** Heatmap comparing the contrast between 8 differentially-regulated genes (between AC2P20  
570 and AC2P36 at pH 5.7) that are involved in lipid metabolism and central metabolism. Genes were  
571 annotated with the H37Rv genome.

572 **S3A.** Mass spectrometry data showing adduct formation between AC2P20 and GSH at pH 7.0.

573 Spectra were analyzed in negative ESI mode.

574 **S3B.** Mass spectrometry data showing adduct formation between AC2P20 and GSH at pH 8.5.

575 Spectra were analyzed in negative ESI mode.

576 **S3C.** AC2P20 incubated with DMSO does not fragment in the absence of GSH at pH 7.0. Spectra

577 were analyzed in negative ESI mode.

578 **S3D.** AC2P20 incubated with DMSO does not fragment in the absence of GSH at pH 8.5. Spectra

579 were analyzed in negative ESI mode.

580 **S4A.** Mass spectrometry data showing adduct formation between AC2P20 and N-acetylcysteine

581 at pH 5.7. Spectra were analyzed in negative ESI mode.

582 **S4B.** Mass spectrometry data showing adduct formation between AC2P20 and N-acetylcysteine

583 at pH 7.0. Spectra were analyzed in negative ESI mode. 20 +NAC 7.0

584 **S4C.** Mass spectrometry data showing adduct formation between AC2P20 and N-acetylcysteine

585 at pH 8.5. Spectra were analyzed in negative ESI mode.

586 **S4D.** AC2P20 is still able to form an adduct with GSH in the presence of the oxidant, H<sub>2</sub>O<sub>2</sub>. Spectra

587 were analyzed in negative ESI mode.

588 **S5.** A list of labeled mass spectrometry peaks with their corresponding hypothetical chemical

589 scaffolds.

590

591 **Supplemental Table:**

592 **Table S1:** Analyzed RNA-seq transcriptional profiling data. S1A. Classification of differentially

593 regulated genes. S1B. Genes significantly induced by AC2P20. S1C. Genes significantly repressed

594 by AC2P20. S1D. Complete list of unfiltered gene expression data in response to AC2P20

595 treatment.

596

597 **References**

- 598 1. Dutta NK, Karakousis PC (2014) Latent tuberculosis infection: myths, models, and molecular  
599 mechanisms. *Microbiol Mol Biol Rev* 78 (3):343-371. doi:10.1128/MMBR.00010-14
- 600 2. Rohde KH, Abramovitch RB, Russell DG (2007) Mycobacterium tuberculosis invasion of  
601 macrophages: linking bacterial gene expression to environmental cues. *Cell Host Microbe* 2  
602 (5):352-364. doi:10.1016/j.chom.2007.09.006
- 603 3. Baker JJ, Dechow SJ, Abramovitch RB (2019) Acid Fasting: Modulation of Mycobacterium  
604 tuberculosis Metabolism at Acidic pH. *Trends Microbiol* 27 (11):942-953.  
605 doi:10.1016/j.tim.2019.06.005
- 606 4. MacMicking JD, Taylor GA, McKinney JD (2003) Immune control of tuberculosis by IFN-  
607 gamma-inducible LRG-47. *Science* 302 (5645):654-659. doi:10.1126/science.1088063
- 608 5. Vandal OH, Nathan CF, Ehrt S (2009) Acid resistance in Mycobacterium tuberculosis. *J*  
609 *Bacteriol* 191 (15):4714-4721. doi:10.1128/JB.00305-09
- 610 6. Vandal OH, Pierini LM, Schnappinger D, Nathan CF, Ehrt S (2008) A membrane protein  
611 preserves intrabacterial pH in intraphagosomal Mycobacterium tuberculosis. *Nat Med* 14  
612 (8):849-854. doi:10.1038/nm.1795
- 613 7. Vandal OH, Roberts JA, Odaira T, Schnappinger D, Nathan CF, Ehrt S (2009) Acid-  
614 susceptible mutants of Mycobacterium tuberculosis share hypersusceptibility to cell wall and  
615 oxidative stress and to the host environment. *J Bacteriol* 191 (2):625-631. doi:10.1128/JB.00932-  
616 08
- 617 8. Song H, Huff J, Janik K, Walter K, Keller C, Ehlers S, Bossmann SH, Niederweis M (2011)  
618 Expression of the ompATb operon accelerates ammonia secretion and adaptation of  
619 Mycobacterium tuberculosis to acidic environments. *Mol Microbiol* 80 (4):900-918.  
620 doi:10.1111/j.1365-2958.2011.07619.x
- 621 9. Baker JJ, Johnson BK, Abramovitch RB (2014) Slow growth of Mycobacterium tuberculosis  
622 at acidic pH is regulated by phoPR and host-associated carbon sources. *Mol Microbiol* 94 (1):56-  
623 69. doi:10.1111/mmi.12688
- 624 10. Mehta M, Rajmani RS, Singh A (2016) Mycobacterium tuberculosis WhiB3 Responds to  
625 Vacuolar pH-induced Changes in Mycothiol Redox Potential to Modulate Phagosomal  
626 Maturation and Virulence. *J Biol Chem* 291 (6):2888-2903. doi:10.1074/jbc.M115.684597
- 627 11. Farhana A, Guidry L, Srivastava A, Singh A, Hondalus MK, Steyn AJ (2010) Reductive  
628 stress in microbes: implications for understanding Mycobacterium tuberculosis disease and  
629 persistence. *Adv Microb Physiol* 57 (C):43-117. doi:10.1016/B978-0-12-381045-8.00002-3
- 630 12. Abramovitch RB, Rohde KH, Hsu FF, Russell DG (2011) aprABC: a Mycobacterium  
631 tuberculosis complex-specific locus that modulates pH-driven adaptation to the macrophage  
632 phagosome. *Mol Microbiol* 80 (3):678-694. doi:10.1111/j.1365-2958.2011.07601.x



- 633 13. Singh A, Guidry L, Narasimhulu KV, Mai D, Trombley J, Redding KE, Giles GI, Lancaster  
634 JR, Jr., Steyn AJ (2007) Mycobacterium tuberculosis WhiB3 responds to O<sub>2</sub> and nitric oxide via  
635 its [4Fe-4S] cluster and is essential for nutrient starvation survival. Proc Natl Acad Sci U S A  
636 104 (28):11562-11567. doi:10.1073/pnas.0700490104
- 637 14. Singh A, Crossman DK, Mai D, Guidry L, Voskuil MI, Renfrow MB, Steyn AJ (2009)  
638 Mycobacterium tuberculosis WhiB3 maintains redox homeostasis by regulating virulence lipid  
639 anabolism to modulate macrophage response. PLoS Pathog 5 (8):e1000545.  
640 doi:10.1371/journal.ppat.1000545
- 641 15. Baker JJ, Abramovitch RB (2018) Genetic and metabolic regulation of Mycobacterium  
642 tuberculosis acid growth arrest. Sci Rep 8 (1):4168. doi:10.1038/s41598-018-22343-4
- 643 16. Zhao N, Darby CM, Small J, Bachovchin DA, Jiang X, Burns-Huang KE, Botella H, Ehrt S,  
644 Boger DL, Anderson ED, Cravatt BF, Speers AE, Fernandez-Vega V, Hodder PS, Eberhart C,  
645 Rosen H, Spicer TP, Nathan CF (2015) Target-based screen against a periplasmic serine protease  
646 that regulates intrabacterial pH homeostasis in Mycobacterium tuberculosis. ACS Chem Biol 10  
647 (2):364-371. doi:10.1021/cb500746z
- 648 17. Darby CM, Ingolfsson HI, Jiang X, Shen C, Sun M, Zhao N, Burns K, Liu G, Ehrt S, Warren  
649 JD, Andersen OS, Brickner SJ, Nathan C (2013) Whole cell screen for inhibitors of pH  
650 homeostasis in Mycobacterium tuberculosis. PLoS One 8 (7):e68942.  
651 doi:10.1371/journal.pone.0068942
- 652 18. Early J, Ollinger J, Darby C, Alling T, Mullen S, Casey A, Gold B, Ochoada J, Wiernicki T,  
653 Masquelin T, Nathan C, Hipskind PA, Parish T (2019) Identification of Compounds with pH-  
654 Dependent Bactericidal Activity against Mycobacterium tuberculosis. ACS Infect Dis 5 (2):272-  
655 280. doi:10.1021/acsinfecdis.8b00256
- 656 19. Reichlen MJ, Leistikow RL, Scobey MS, Born SEM, Voskuil MI (2017) Anaerobic  
657 Mycobacterium tuberculosis Cell Death Stems from Intracellular Acidification Mitigated by the  
658 DosR Regulon. J Bacteriol 199 (23). doi:10.1128/JB.00320-17
- 659 20. Tan MP, Sequeira P, Lin WW, Phong WY, Cliff P, Ng SH, Lee BH, Camacho L,  
660 Schnappinger D, Ehrt S, Dick T, Pethe K, Alonso S (2010) Nitrate respiration protects hypoxic  
661 Mycobacterium tuberculosis against acid- and reactive nitrogen species stresses. PLoS One 5  
662 (10):e13356. doi:10.1371/journal.pone.0013356
- 663 21. Hards K, McMillan DGG, Schurig-Briccio LA, Gennis RB, Lill H, Bald D, Cook GM (2018)  
664 Ionophoric effects of the antitubercular drug bedaquiline. Proc Natl Acad Sci U S A 115  
665 (28):7326-7331. doi:10.1073/pnas.1803723115
- 666 22. Flentie K, Harrison GA, Tukenmez H, Livny J, Good JAD, Sarkar S, Zhu DX, Kinsella RL,  
667 Weiss LA, Solomon SD, Schene ME, Hansen MR, Cairns AG, Kulen M, Wixe T, Lindgren  
668 AEG, Chorell E, Bengtsson C, Krishnan KS, Hultgren SJ, Larsson C, Almqvist F, Stallings CL  
669 (2019) Chemical disarming of isoniazid resistance in Mycobacterium tuberculosis. Proc Natl  
670 Acad Sci U S A 116 (21):10510-10517. doi:10.1073/pnas.1818009116

- 671 23. Harbut MB, Vilcheze C, Luo X, Hensler ME, Guo H, Yang B, Chatterjee AK, Nizet V,  
672 Jacobs WR, Jr., Schultz PG, Wang F (2015) Auranofin exerts broad-spectrum bactericidal  
673 activities by targeting thiol-redox homeostasis. *Proc Natl Acad Sci U S A* 112 (14):4453-4458.  
674 doi:10.1073/pnas.1504022112
- 675 24. Lin K, O'Brien KM, Trujillo C, Wang R, Wallach JB, Schnappinger D, Ehrt S (2016)  
676 *Mycobacterium tuberculosis* Thioredoxin Reductase Is Essential for Thiol Redox Homeostasis  
677 but Plays a Minor Role in Antioxidant Defense. *PLoS Pathog* 12 (6):e1005675.  
678 doi:10.1371/journal.ppat.1005675
- 679 25. Perez E, Samper S, Bordas Y, Guillhot C, Gicquel B, Martin C (2001) An essential role for  
680 *phoP* in *Mycobacterium tuberculosis* virulence. *Mol Microbiol* 41 (1):179-187.  
681 doi:10.1046/j.1365-2958.2001.02500.x
- 682 26. Gonzalo-Asensio J, Mostowy S, Harders-Westerveen J, Huygen K, Hernández-Pando R,  
683 Thole J, Behr M, Gicquel B, Martín C (2008) PhoP: A Missing Piece in the Intricate Puzzle of  
684 *Mycobacterium tuberculosis* Virulence. *PLOS ONE* 3 (10):e3496.  
685 doi:10.1371/journal.pone.0003496
- 686 27. Walters SB, Dubnau E, Kolesnikova I, Laval F, Daffe M, Smith I (2006) The  
687 *Mycobacterium tuberculosis* PhoPR two-component system regulates genes essential for  
688 virulence and complex lipid biosynthesis. *Mol Microbiol* 60 (2):312-330. doi:10.1111/j.1365-  
689 2958.2006.05102.x
- 690 28. Johnson BK, Colvin CJ, Needle DB, Mba Medie F, Champion PA, Abramovitch RB (2015)  
691 The Carbonic Anhydrase Inhibitor Ethoxzolamide Inhibits the *Mycobacterium tuberculosis*  
692 PhoPR Regulon and *Esx-1* Secretion and Attenuates Virulence. *Antimicrob Agents Chemother*  
693 59 (8):4436-4445. doi:10.1128/AAC.00719-15
- 694 29. Coulson GB, Johnson BK, Zheng H, Colvin CJ, Fillinger RJ, Haiderer ER, Hammer ND,  
695 Abramovitch RB (2017) Targeting *Mycobacterium tuberculosis* Sensitivity to Thiol Stress at  
696 Acidic pH Kills the Bacterium and Potentiates Antibiotics. *Cell Chem Biol* 24 (8):993-1004  
697 e1004. doi:10.1016/j.chembiol.2017.06.018
- 698 30. Johnson BK, Scholz MB, Teal TK, Abramovitch RB (2016) SPARTA: Simple Program for  
699 Automated reference-based bacterial RNA-seq Transcriptome Analysis. *BMC Bioinformatics*  
700 17:66. doi:10.1186/s12859-016-0923-y
- 701 31. Purdy GE, Niederweis M, Russell DG (2009) Decreased outer membrane permeability  
702 protects mycobacteria from killing by ubiquitin-derived peptides. *Mol Microbiol* 73 (5):844-857.  
703 doi:10.1111/j.1365-2958.2009.06801.x
- 704 32. Saini V, Cumming BM, Guidry L, Lamprecht DA, Adamson JH, Reddy VP, Chinta KC,  
705 Mazorodze JH, Glasgow JN, Richard-Greenblatt M, Gomez-Velasco A, Bach H, Av-Gay Y, Eoh  
706 H, Rhee K, Steyn AJC (2016) Ergothioneine Maintains Redox and Bioenergetic Homeostasis  
707 Essential for Drug Susceptibility and Virulence of *Mycobacterium tuberculosis*. *Cell Rep* 14  
708 (3):572-585. doi:10.1016/j.celrep.2015.12.056

- 709 33. Williams JT, Haiderer ER, Coulson GB, Conner KN, Ellsworth E, Chen C, Alvarez-Cabrera  
710 N, Li W, Jackson M, Dick T, Abramovitch RB (2019) Identification of New MmpL3 Inhibitors  
711 by Untargeted and Targeted Mutant Screens Defines MmpL3 Domains with Differential  
712 Resistance. *Antimicrob Agents Chemother* 63 (10). doi:10.1128/AAC.00547-19
- 713 34. Zheng H, Colvin CJ, Johnson BK, Kirchhoff PD, Wilson M, Jorgensen-Muga K, Larsen SD,  
714 Abramovitch RB (2017) Inhibitors of Mycobacterium tuberculosis DosRST signaling and  
715 persistence. *Nat Chem Biol* 13 (2):218-225. doi:10.1038/nchembio.2259
- 716 35. Kapopoulou A, Lew JM, Cole ST (2011) The MycoBrowser portal: a comprehensive and  
717 manually annotated resource for mycobacterial genomes. *Tuberculosis (Edinb)* 91 (1):8-13.  
718 doi:10.1016/j.tube.2010.09.006
- 719 36. Voskuil MI, Bartek IL, Visconti K, Schoolnik GK (2011) The response of mycobacterium  
720 tuberculosis to reactive oxygen and nitrogen species. *Front Microbiol* 2:105.  
721 doi:10.3389/fmicb.2011.00105
- 722 37. Manganelli R, Voskuil MI, Schoolnik GK, Dubnau E, Gomez M, Smith I (2002) Role of the  
723 extracytoplasmic-function sigma factor sigma(H) in Mycobacterium tuberculosis global gene  
724 expression. *Mol Microbiol* 45 (2):365-374. doi:10.1046/j.1365-2958.2002.03005.x
- 725 38. Raman S, Song T, Puyang X, Bardarov S, Jacobs WR, Jr., Husson RN (2001) The alternative  
726 sigma factor SigH regulates major components of oxidative and heat stress responses in  
727 Mycobacterium tuberculosis. *J Bacteriol* 183 (20):6119-6125. doi:10.1128/JB.183.20.6119-  
728 6125.2001
- 729 39. Voss M, Nimtz M, Leimkuhler S (2011) Elucidation of the dual role of Mycobacterial  
730 MoeZR in molybdenum cofactor biosynthesis and cysteine biosynthesis. *PLoS One* 6  
731 (11):e28170. doi:10.1371/journal.pone.0028170
- 732 40. Warriar T, Kapilashrami K, Argyrou A, Ioerger TR, Little D, Murphy KC, Nandakumar M,  
733 Park S, Gold B, Mi J, Zhang T, Meiler E, Rees M, Somersan-Karakaya S, Porrás-De Francisco  
734 E, Martínez-Hoyos M, Burns-Huang K, Roberts J, Ling Y, Rhee KY, Mendoza-Losana A, Luo  
735 M, Nathan CF (2016) N-methylation of a bactericidal compound as a resistance mechanism in  
736 Mycobacterium tuberculosis. *Proc Natl Acad Sci U S A* 113 (31):E4523-4530.  
737 doi:10.1073/pnas.1606590113
- 738 41. Sun Z, Cheng SJ, Zhang H, Zhang Y (2001) Salicylate uniquely induces a 27-kDa protein in  
739 tubercle bacillus. *FEMS Microbiol Lett* 203 (2):211-216. doi:10.1111/j.1574-  
740 6968.2001.tb10843.x
- 741 42. Cole ST, Brosch R, Parkhill J, Garnier T, Churcher C, Harris D, Gordon SV, Eiglmeier K,  
742 Gas S, Barry CE, 3rd, Tekaia F, Badcock K, Basham D, Brown D, Chillingworth T, Connor R,  
743 Davies R, Devlin K, Feltwell T, Gentles S, Hamlin N, Holroyd S, Hornsby T, Jagels K, Krogh A,  
744 McLean J, Moule S, Murphy L, Oliver K, Osborne J, Quail MA, Rajandream MA, Rogers J,  
745 Rutter S, Seeger K, Skelton J, Squares R, Squares S, Sulston JE, Taylor K, Whitehead S, Barrell  
746 BG (1998) Deciphering the biology of Mycobacterium tuberculosis from the complete genome  
747 sequence. *Nature* 393 (6685):537-544. doi:10.1038/31159

- 748 43. Garbe TR (2004) Co-induction of methyltransferase Rv0560c by naphthoquinones and fibric  
749 acids suggests attenuation of isoprenoid quinone action in *Mycobacterium tuberculosis*. *Can J*  
750 *Microbiol* 50 (10):771-778. doi:10.1139/w04-067
- 751 44. Camus JC, Pryor MJ, Medigue C, Cole ST (2002) Re-annotation of the genome sequence of  
752 *Mycobacterium tuberculosis* H37Rv. *Microbiology* 148 (Pt 10):2967-2973.  
753 doi:10.1099/00221287-148-10-2967
- 754 45. Motiwala HF, Kuo YH, Stinger BL, Palfey BA, Martin BR (2020) Tunable Heteroaromatic  
755 Sulfones Enhance in-Cell Cysteine Profiling. *J Am Chem Soc* 142 (4):1801-1810.  
756 doi:10.1021/jacs.9b08831
- 757 46. Zambaldo C, Vinogradova EV, Qi X, Iaconelli J, Suciu RM, Koh M, Senkane K, Chadwick  
758 SR, Sanchez BB, Chen JS, Chatterjee AK, Liu P, Schultz PG, Cravatt BF, Bollong MJ (2020) 2-  
759 Sulfonylpyridines as Tunable, Cysteine-Reactive Electrophiles. *J Am Chem Soc* 142 (19):8972-  
760 8979. doi:10.1021/jacs.0c02721
- 761 47. Murphy CM, Fenselau C, Gutierrez PL (1992) Fragmentation characteristic of glutathione  
762 conjugates activated by high-energy collisions. *J Am Soc Mass Spectrom* 3 (8):815-822.  
763 doi:10.1016/1044-0305(92)80004-5
- 764 48. Fine Z, Wood TD (2013) Formation of Mercury(II)-Glutathione Conjugates Examined Using  
765 High Mass Accuracy Mass Spectrometry. *Int J Anal Mass Spectrom Cromatogr* 1 (2):90-94.  
766 doi:10.4236/ijamsc.2013.12011
- 767 49. Abedinzadeh Z, Gardes-Albert M, Ferradini C (1989) Kinetic study of the oxidation  
768 mechanism of glutathione by hydrogen peroxide in neutral aqueous medium. *Canadian Journal*  
769 *of Chemistry* 67:1247-1255
- 770 50. Mishra R, Kohli S, Malhotra N, Bandyopadhyay P, Mehta M, Munshi M, Adiga V, Ahuja  
771 VK, Shandil RK, Rajmani RS, Seshasayee ASN, Singh A (2019) Targeting redox heterogeneity  
772 to counteract drug tolerance in replicating *Mycobacterium tuberculosis*. *Sci Transl Med* 11 (518).  
773 doi:10.1126/scitranslmed.aaw6635
- 774 51. Ruth MM, van Rossum M, Koeken V, Pennings LJ, Svensson EM, Ruesen C, Bowles EC,  
775 Wertheim HFL, Hoefsloot W, van Ingen J (2019) Auranofin Activity Exposes Thioredoxin  
776 Reductase as a Viable Drug Target in *Mycobacterium abscessus*. *Antimicrob Agents Chemother*  
777 63 (9). doi:10.1128/AAC.00449-19
- 778 52. Small JL, O'Donoghue AJ, Boritsch EC, Tsodikov OV, Knudsen GM, Vandal O, Craik CS,  
779 Ehrt S (2013) Substrate specificity of MarP, a periplasmic protease required for resistance to acid  
780 and oxidative stress in *Mycobacterium tuberculosis*. *J Biol Chem* 288 (18):12489-12499.  
781 doi:10.1074/jbc.M113.456541
- 782 53. Newton GL, Arnold K, Price MS, Sherrill C, Delcardayre SB, Aharonowitz Y, Cohen G,  
783 Davies J, Fahey RC, Davis C (1996) Distribution of thiols in microorganisms: mycothiol is a  
784 major thiol in most actinomycetes. *J Bacteriol* 178 (7):1990-1995. doi:10.1128/jb.178.7.1990-  
785 1995.1996

786 54. Sao Emani C, Williams MJ, Van Helden PD, Taylor MJC, Wiid IJ, Baker B (2018) Gamma-  
787 glutamylcysteine protects ergothioneine-deficient Mycobacterium tuberculosis mutants against  
788 oxidative and nitrosative stress. *Biochem Biophys Res Commun* 495 (1):174-178.  
789 doi:10.1016/j.bbrc.2017.10.163  
790

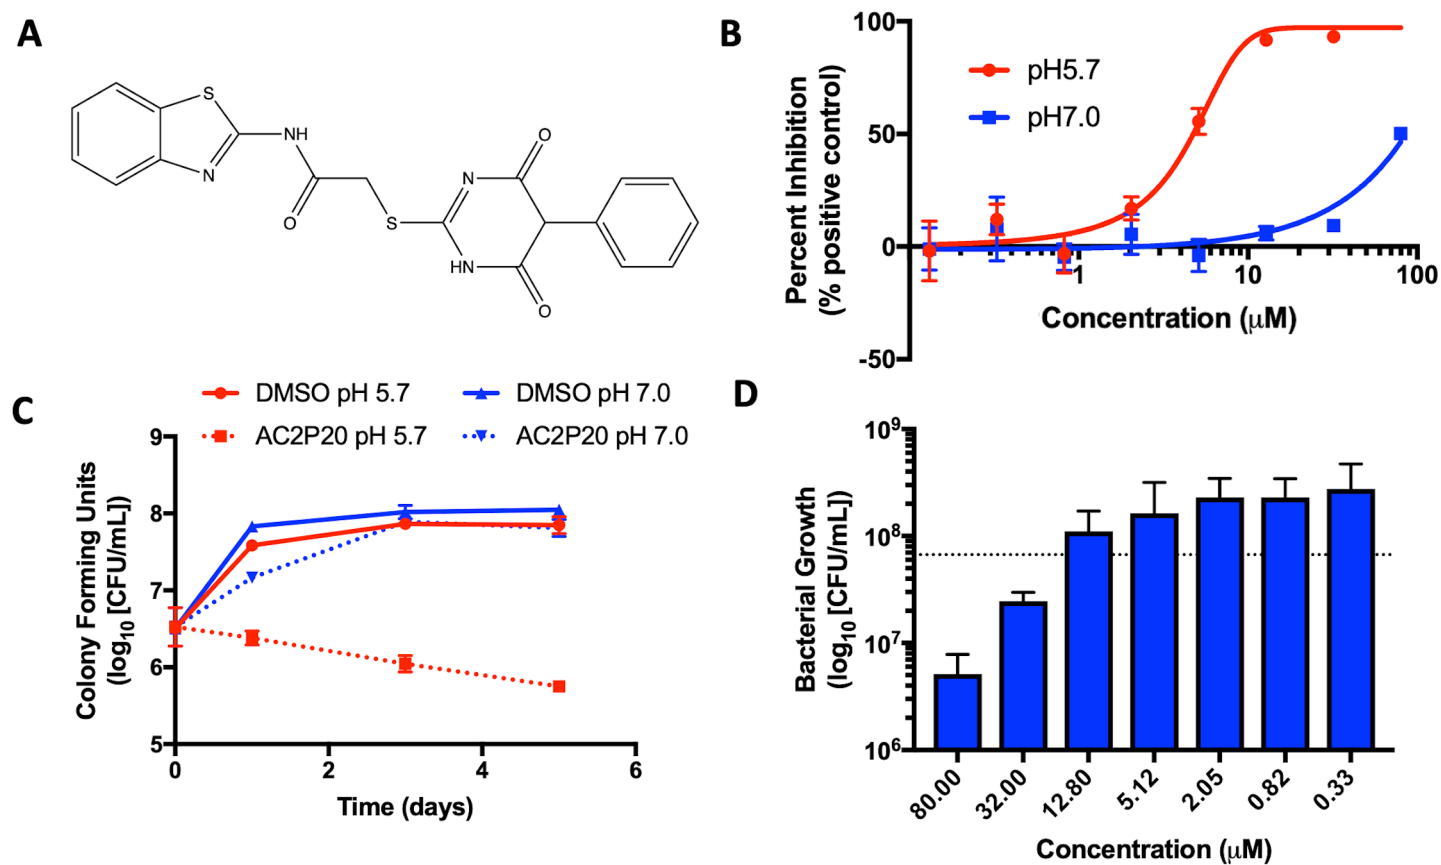

Figure 1



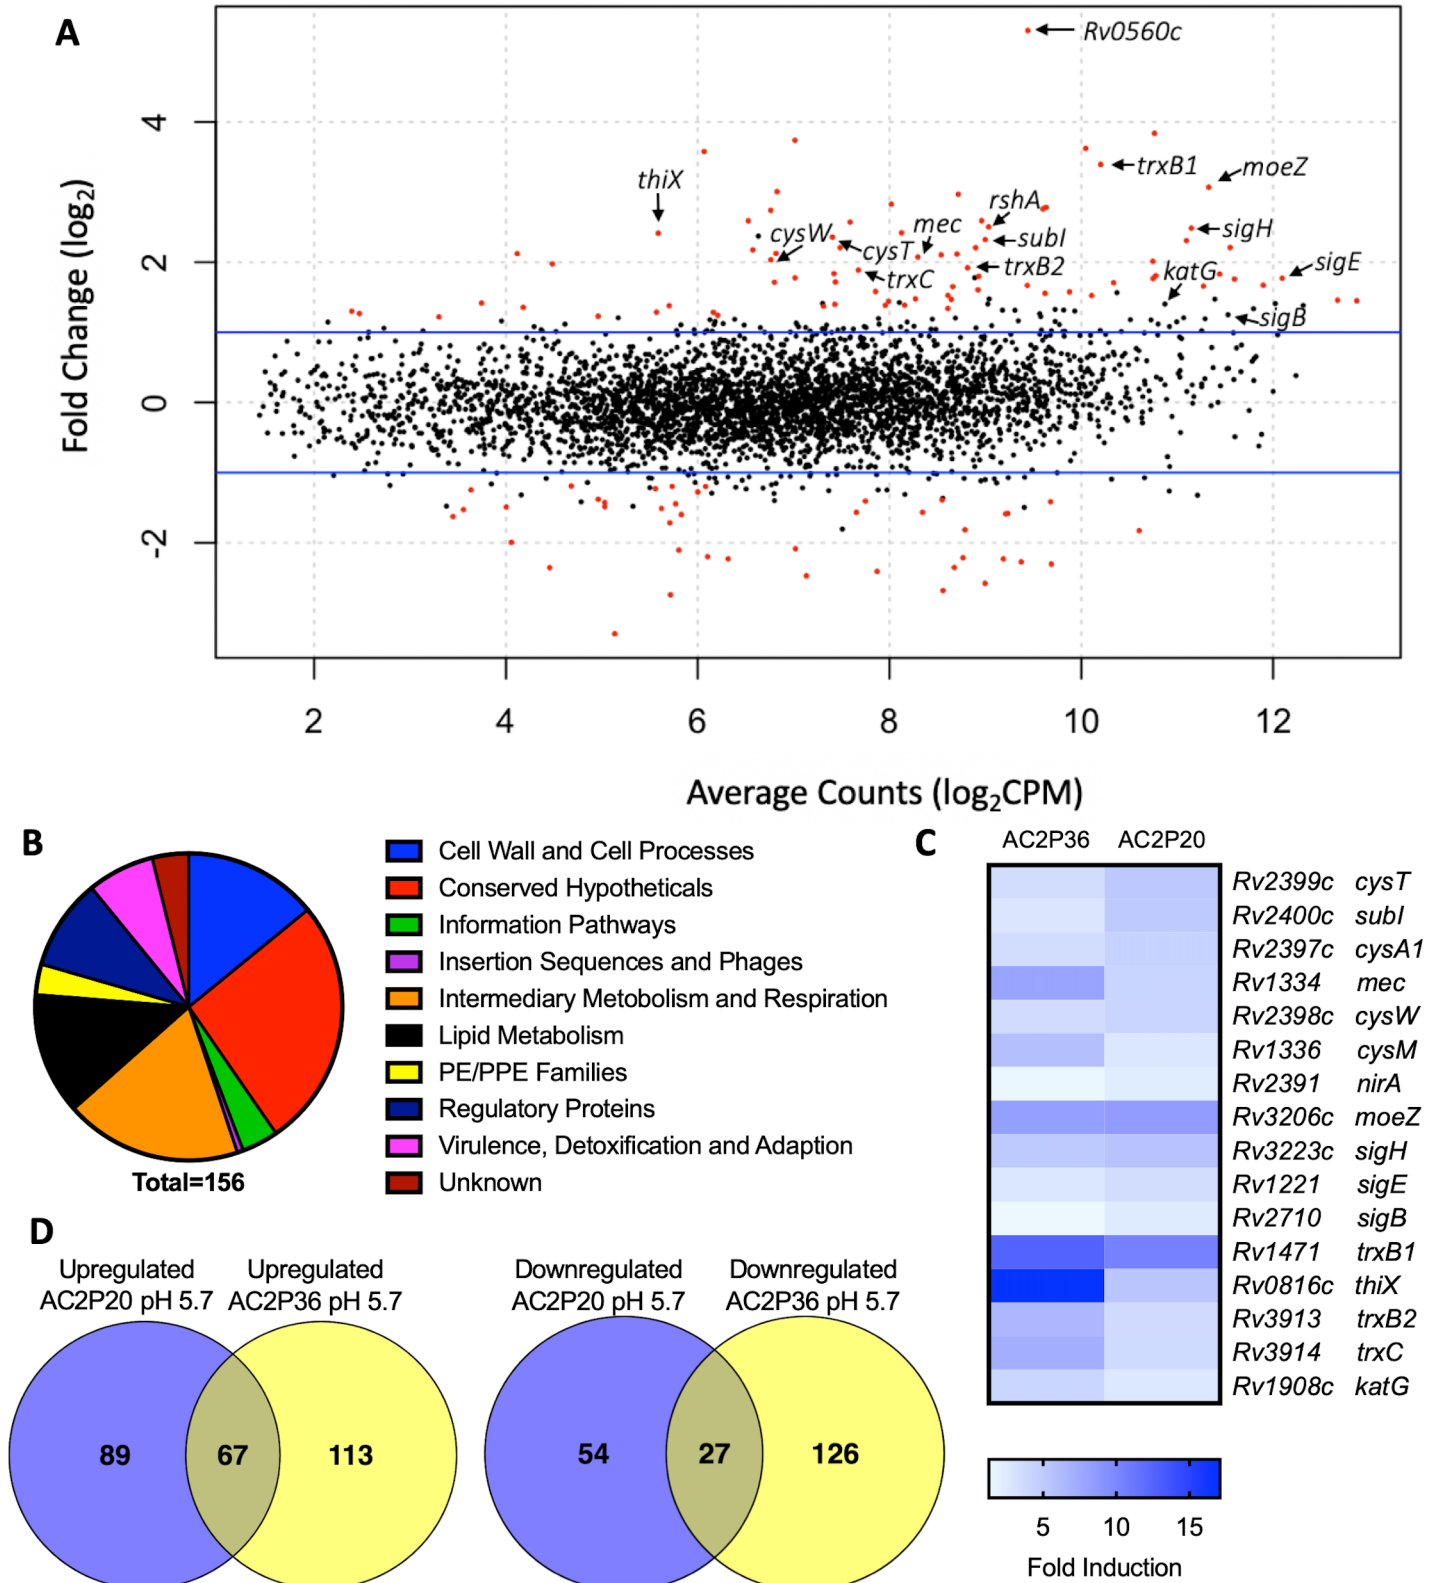

**Figure 2**

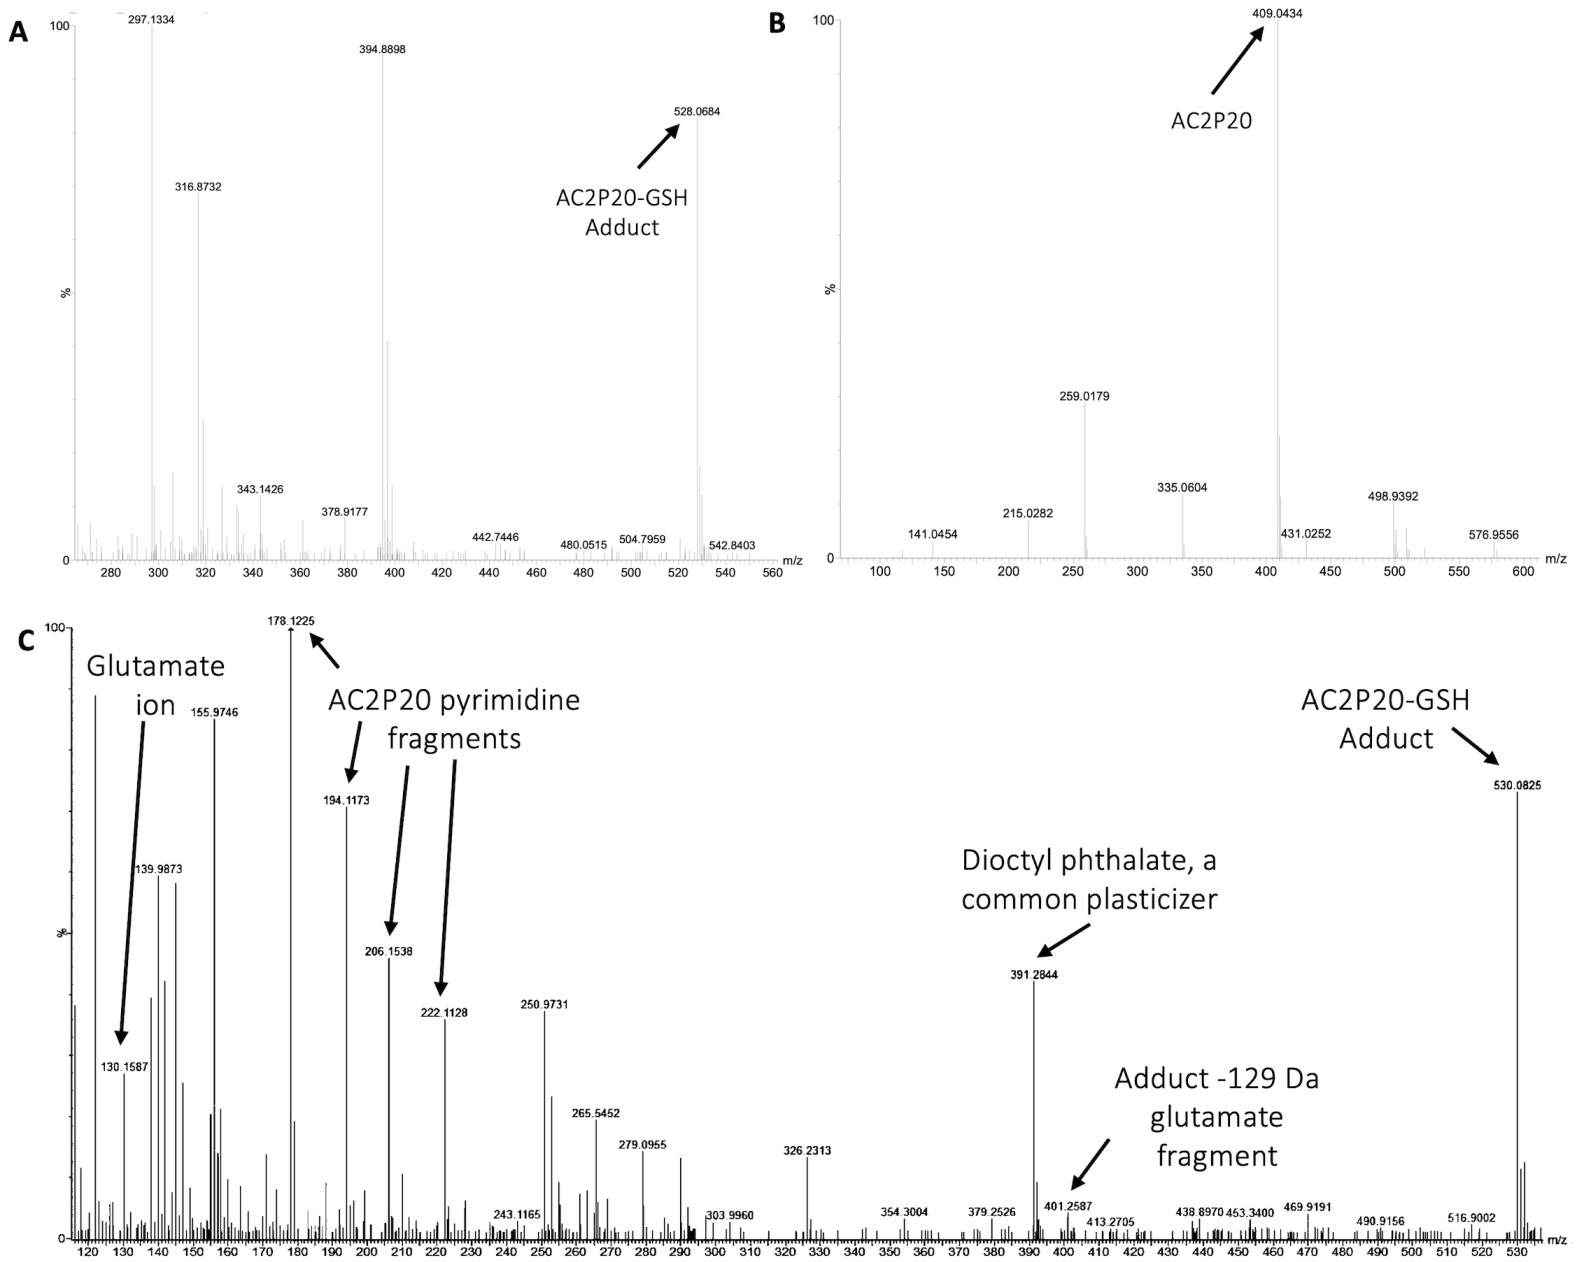

**Figure 3**



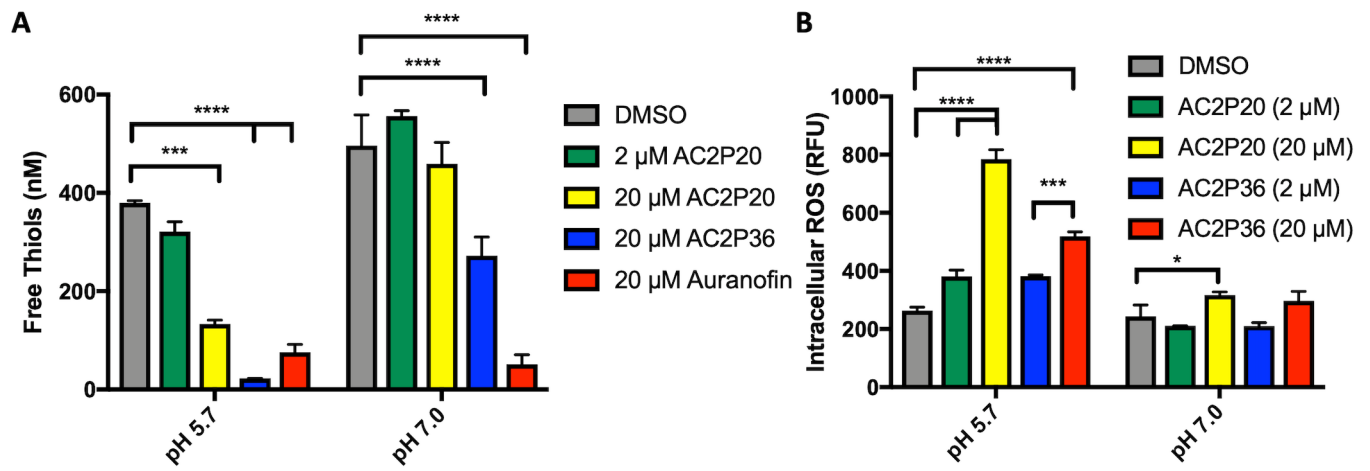

**Figure 4**

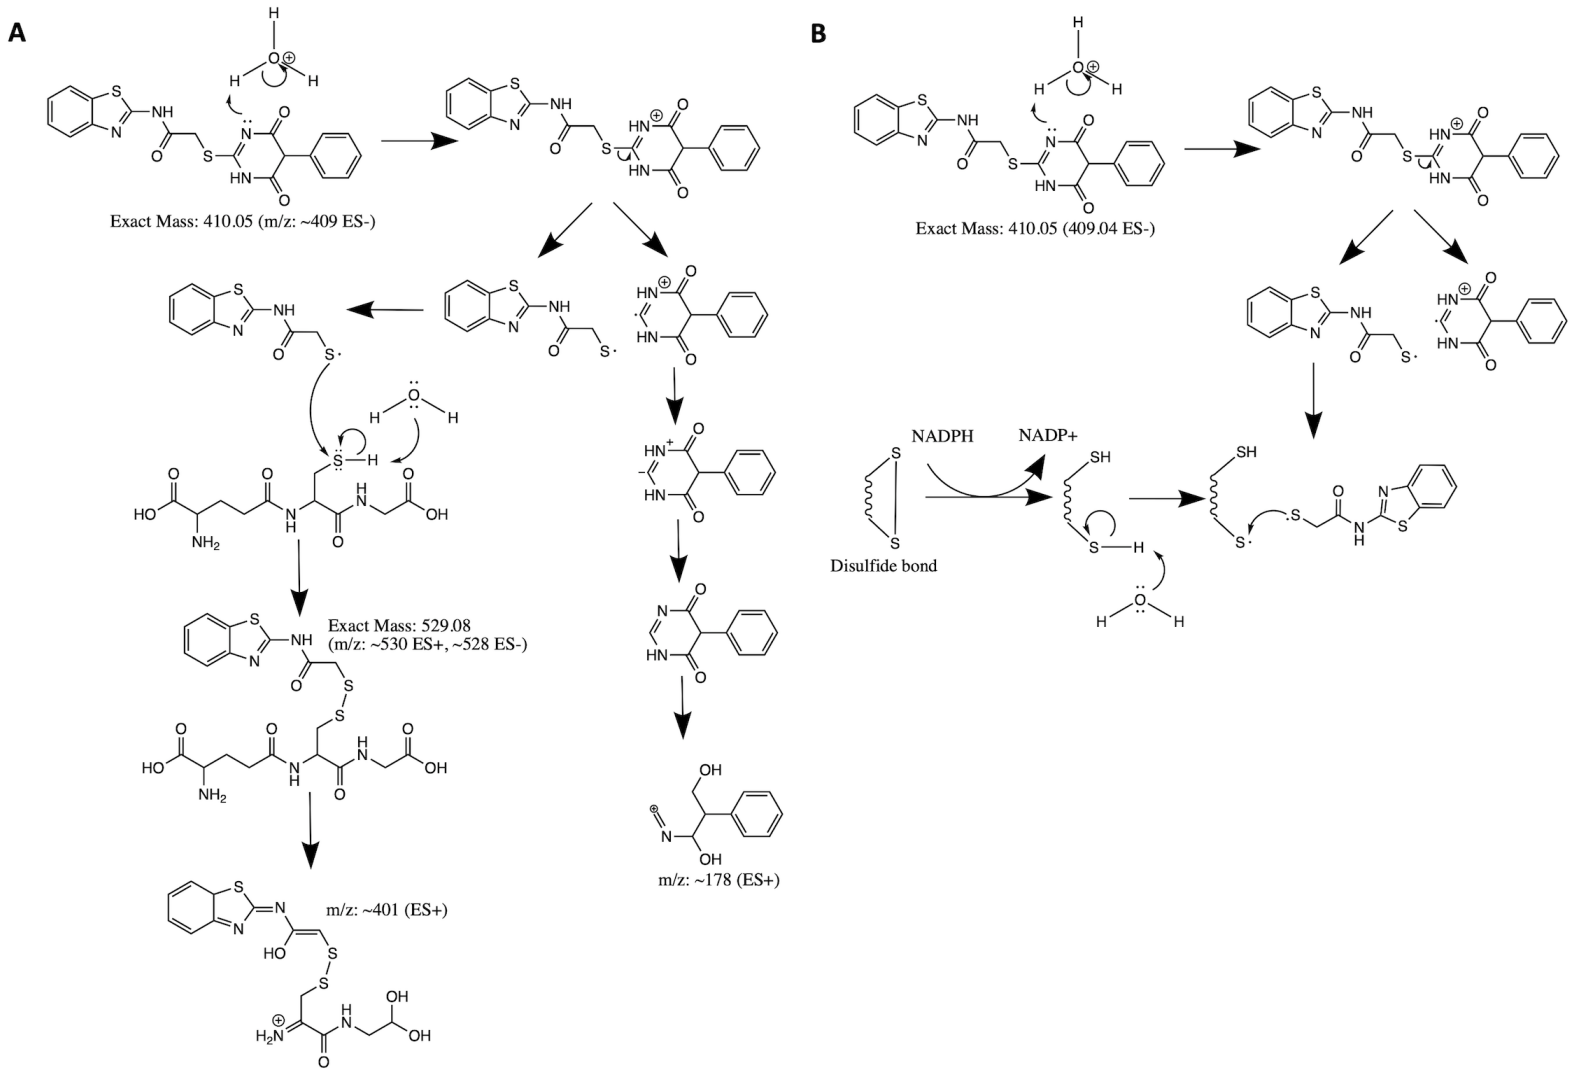

**Figure 5**

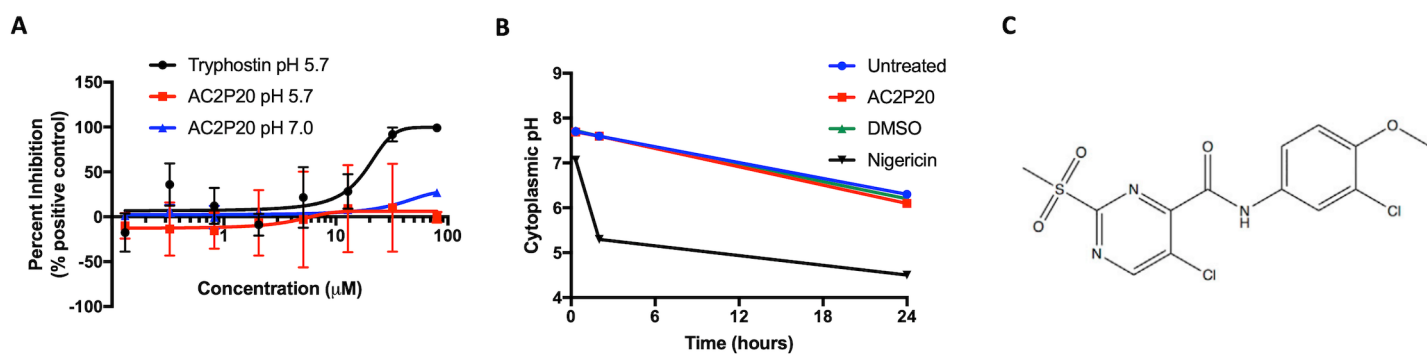

Supplemental Figure 1

**A**

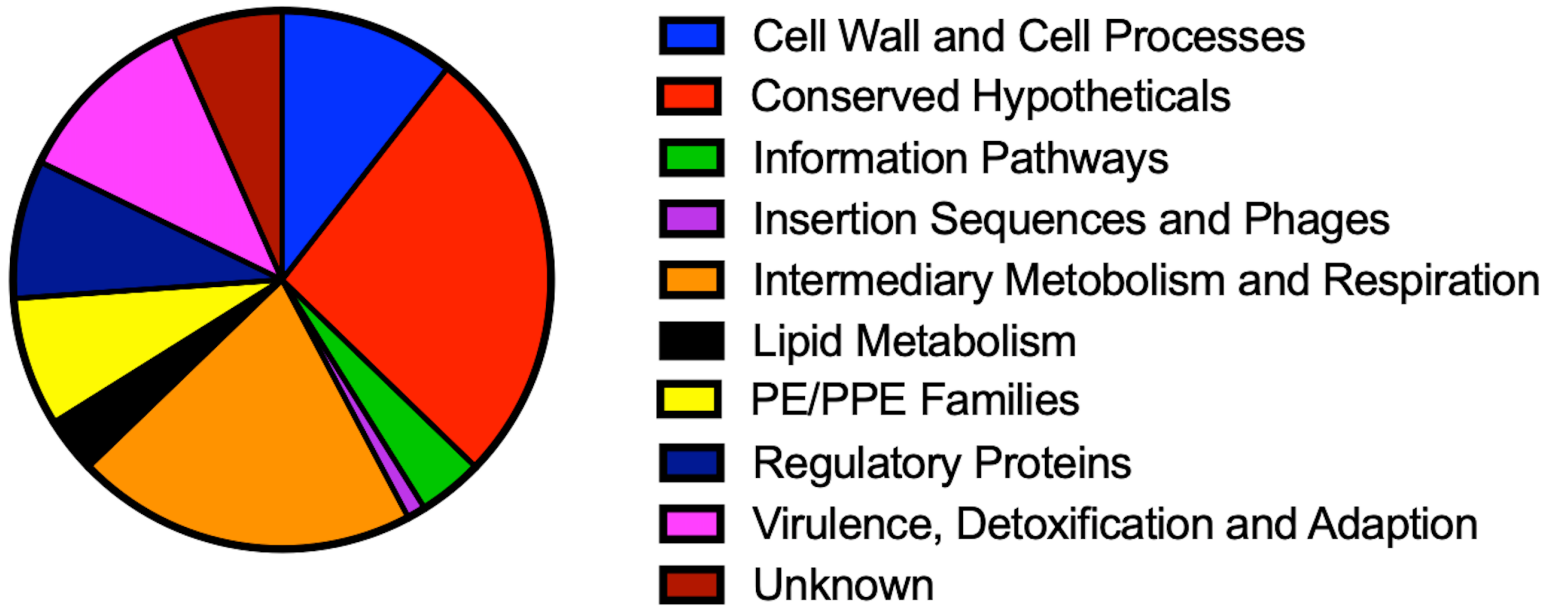

**Total=180**

**B**

AC2P36 AC2P20

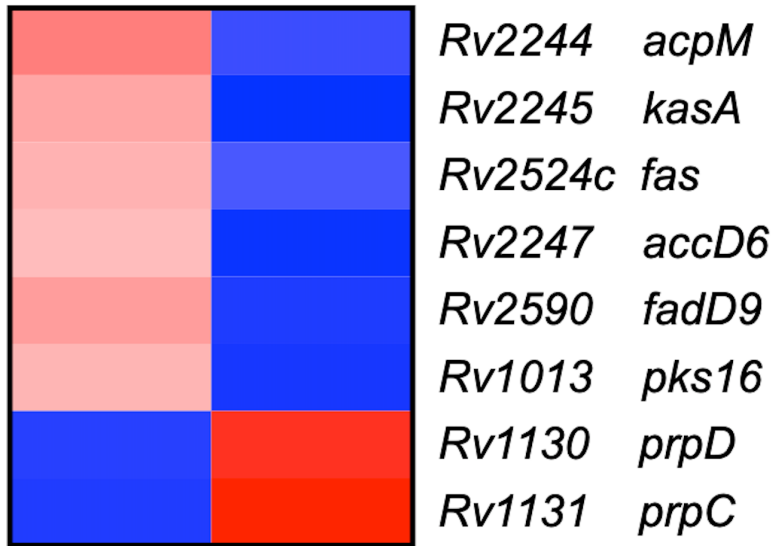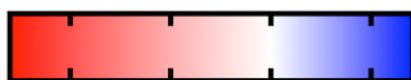

-5.0 -2.5 0 2.5

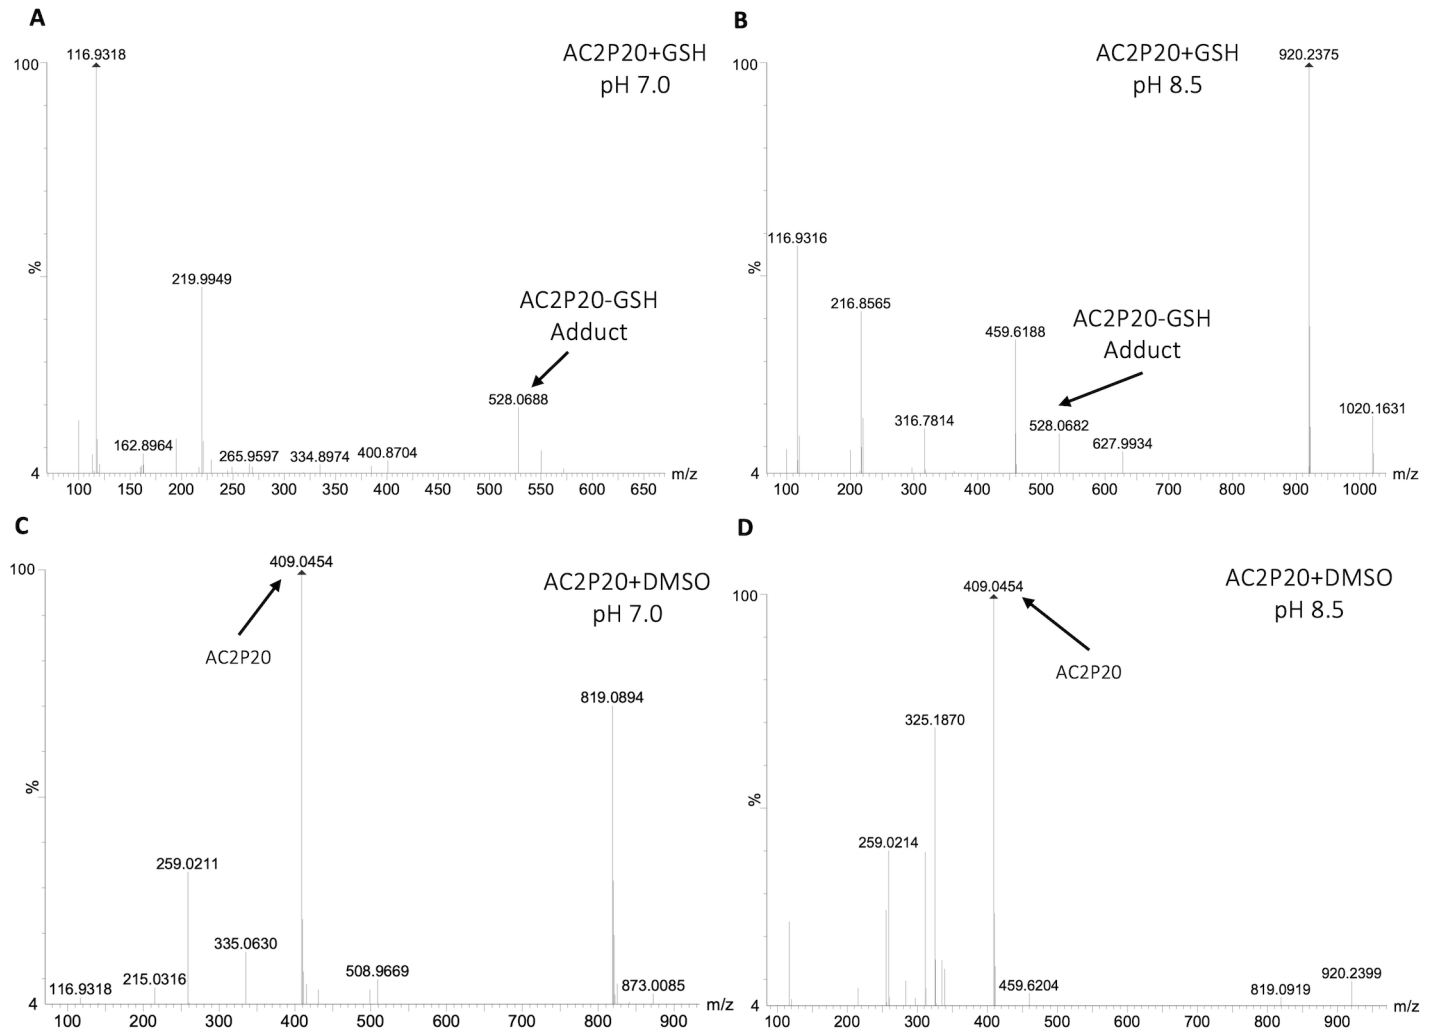

Supplemental Figure 3

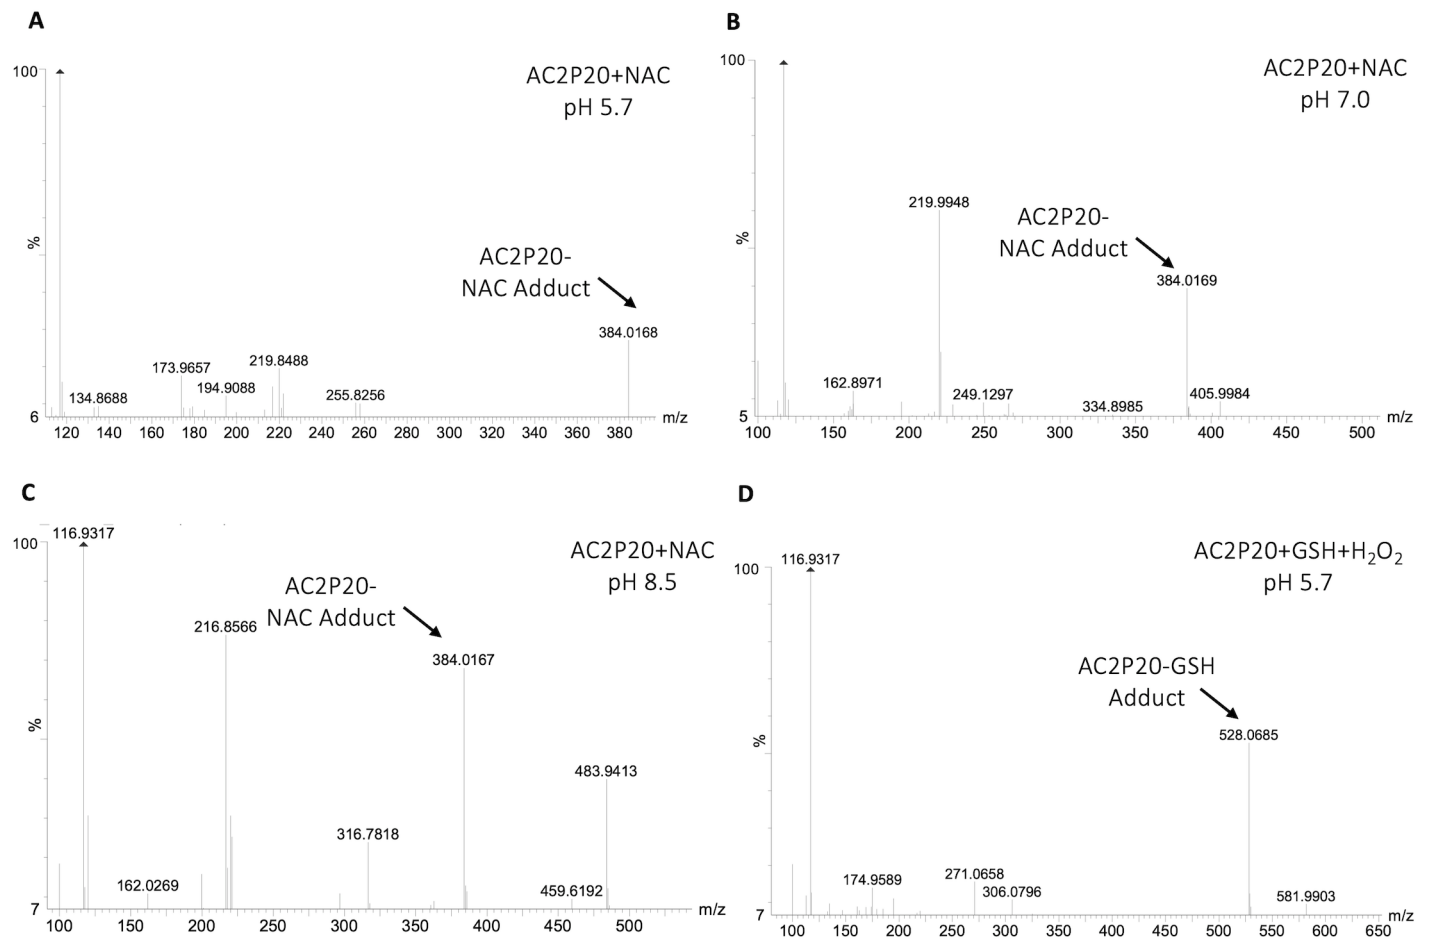

Supplemental Figure 4

| Peak (Da)      | Possible Chemical Scaffold                                                          | Figure No.        |
|----------------|-------------------------------------------------------------------------------------|-------------------|
| 130.16         | 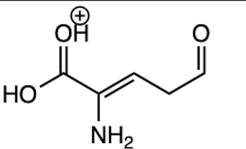   | 3C                |
| 178.12         |    | 3C                |
| 194.12         |    | 3C                |
| 206.15         |    | 3C                |
| 222.11         |    | 3C                |
| 384.02         |   | S3A, S3B, S3C     |
| 391.28         | Phthalate Plasticizer                                                               | 3C                |
| 401.26         |  | 3C                |
| 409.04, 409.05 |  | 3B, S2C, S2D,     |
| 528.06, 528.07 |  | 3A, S2A, S2B, S3D |
| 530.08         |  | 3C                |

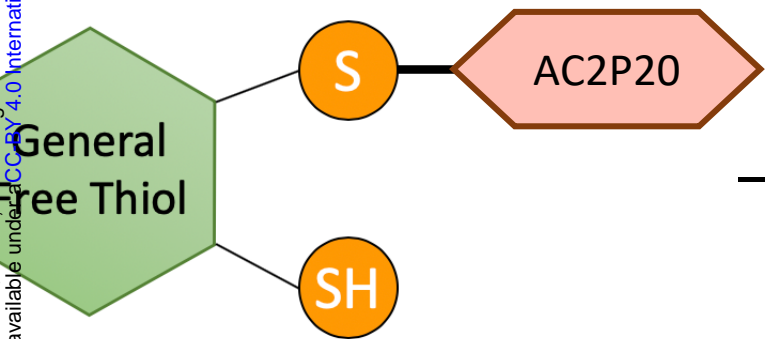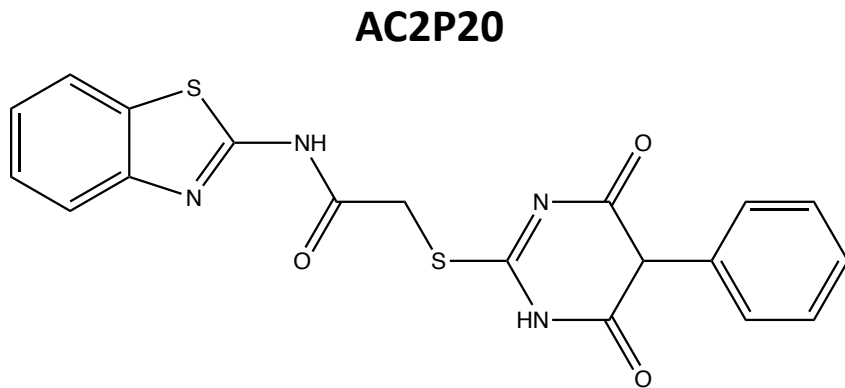

Free thiol concentration

Reactive oxygen species

Selective killing of *M. tuberculosis* at acidic pH

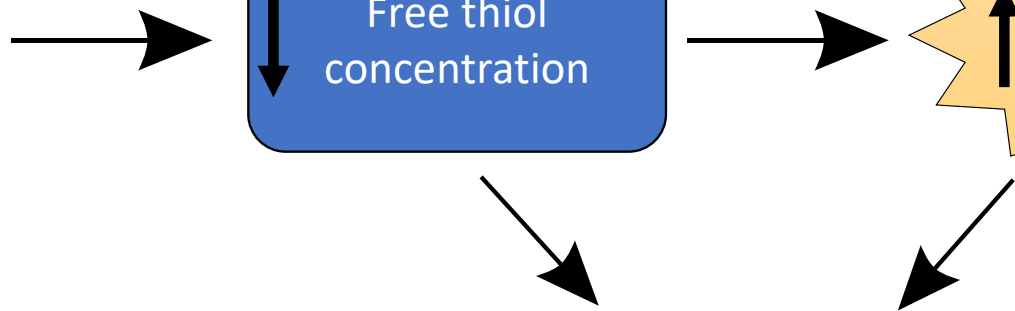

Source: https://www.biorxiv.org/content/10.1101/2021.03.16.435645v2.full.pdf
