# Supplementary material for: AC2P20 selectively kills M. tuberculosis at acidic pH by depleting free thiols
Source: bioRxiv preprint, doi:10.1101/2021.03.16.435645, version 2 (2021-03-17)
Supplement: Supplemental Tables [file 435645_file02.xlsx]

## Sheet: Table S1A, Gene Summary
Classification Breakdown (FDR < 0.05)
		Upregulated >2-fold		Downregulated >2-fold
	Total # genes (FDR < 0.05)	# genes	%	# genes	%
Cell Wall and Cell Processes	36	22	61.1111	17	47.2222
Conserved Hypotheticals	48	41	85.4167	14	29.1667
Information Pathways	9	6	66.6667	4	44.4444
Insertion Sequences and Phages	1	1	100	0	0
Intermediary Metobolism and Respiration	38	29	76.3158	12	31.5789
Lipid Metabolism	29	20	68.9655	14	48.2759
PE/PPE Families	14	5	35.7143	10	71.4286
Regulatory Proteins	15	15	100	4	26.6667
Virulence, Detoxification and Adaption	12	11	91.6667	2	16.6667
Unknown	35	6	17.1429	4	11.4286
TOTAL	237	156	65.8228	81	34.1772

## Sheet: Table S1B, Up >2x, p<0.05
Table S1B: Genes induced (>2-fold, p<0.05) by AC2P20 vs. DMSO at pH 5.7
Gene	Counts per million (CPM)						AC2P20/DMSO
MT Number	DMSO_5A_1	DMSO_5B_2	AC2P20_5A_1	AC2P20_5A_2	Log2 Fold-change	Fold-change (fraction)	Fold-change (whole)	Log2 CPM	p-value	FDR	Rv Number	Gene Name	Gene Function
MT0586	34.5101	34.2585	1484.8	1227.73	5.29386	39.2293	39.2293	9.4417	1.77e-137	7.05e-134	Rv0560c	Rv0560c	Possible benzoquinone methyltransferase (methylase)
MT0148	154.288	300.467	2546.61	3953.17	3.88038	14.7269	14.7269	10.7638	5.43e-100	1.08e-96	Rv0140	Rv0140	Conserved protein
MT3140	14.5579	21.4058	230.792	249.556	3.75709	13.5206	13.5206	7.01299	2.56e-75	1.7e-72	Rv3054c	Rv3054c	Conserved hypothetical protein
MT3569	175.215	142.582	2191.04	1718.68	3.61785	12.2767	12.2767	10.0457	6.59e-87	8.75e-84	Rv3463	Rv3463	Conserved protein
MT1579	9.1637	11.4657	113.496	133.401	3.58269	11.9811	11.9811	6.06524	4.53e-65	2.58e-62	Rv1528c	papA4	Probable conserved polyketide synthase associated protein PapA4
MT1517	192.373	217.017	1951.24	2347.6	3.38893	10.4754	10.4754	10.2011	1.39e-79	1.11e-76	Rv1471	trxB1	Probable thioredoxin TrxB1
MT3301	366.288	729.092	3175.6	6010.26	3.07949	8.4532	8.4532	11.3278	7.19e-84	7.16e-81	Rv3206c	moeB1	Probable molybdenum cofactor biosynthesis protein MoeB1 (MPT-synthase sulfurylase) (molybdopterin synthase sulphurylase)
MT1924	80.9136	109.479	689.278	802.785	2.98169	7.8991	7.8991	8.71664	6.97e-56	3.09e-53	Rv1875	Rv1875	Conserved protein
MT0356	22.2918	27.9246	241.317	162.105	2.98127	7.8968	7.8968	6.82652	4.28e-36	6.56e-34	Rv0341	iniB	Isoniazid inductible gene protein IniB
MT3319	132.256	267.041	1142.68	1560.17	2.82739	7.0979	7.0979	9.59921	3.65e-44	0	Rv3222c	Rv3222c	Conserved hypothetical protein
MT0150	53.6824	74.5273	336.336	572.608	2.79607	6.9454	6.9454	8.01886	2.53e-51	1.01e-48	Rv0142	Rv0142	Conserved hypothetical protein
MT3969	200.432	202.685	1230.8	1538.47	2.77153	6.8283	6.8283	9.6315	5.99e-50	2.17e-47	Rv3854c	ethA	Monooxygenase EthA
MT0870	25.1514	31.2534	167.817	209.213	2.74027	6.6819	6.6819	6.76078	1.73e-48	5.32e-46	Rv0847	lpqS	Probable lipoprotein LpqS
MT1850	20.2771	32.178	135.54	180.57	2.6108	6.1084	6.1084	6.52714	2.38e-40	5e-38	Rv1801	PPE29	PPE family protein PPE29
MT2540	123.288	160.289	824.175	884.264	2.60176	6.0703	6.0703	8.96026	1.48e-42	3.69e-40	Rv2465c	rpiB	Ribose-5-phosphate isomerase
MT3970	62.3262	48.452	302.188	356.326	2.5784	5.9728	5.9728	7.58798	9.2e-38	1.75e-35	Rv3855	ethR	Transcriptional regulatory repressor protein (TetR-family) EthR
MT3318	141.875	172.495	852.476	929.178	2.50792	5.688	5.688	9.03368	8.22e-41	1.82e-38	Rv3221A	rshA	Anti-sigma factor RshA
MT3320	481.647	894.097	2755.01	4945.36	2.49172	5.6245	5.6245	11.1479	5.54e-56	2.76e-53	Rv3223c	sigH	Alternative RNA polymerase sigma-E factor (sigma-24) SigH (RPOE)
MT0838	14.103	16.2277	74.2605	87.3904	2.41263	5.3245	5.3245	5.58742	2.22e-30	2.46e-28	Rv0816c	thiX	Probable thioredoxin ThiX
MT2049	9.03372	55.0633	46.6029	285.512	2.37061	5.1716	5.1716	6.63148	7.33e-34	1.01e-31	Rv1993c	Rv1993c	Conserved protein
MT2470	60.6364	49.9777	271.665	295.08	2.36304	5.1445	5.1445	7.40448	2.81e-37	5.08e-35	Rv2399c	cysT	Probable sulfate-transport integral membrane protein ABC transporter CysT
MT2471	189.643	151.505	816.749	887.129	2.32827	5.022	5.022	8.99813	3.66e-32	4.71e-30	Rv2400c	subI	Probable sulfate-binding lipoprotein SubI
MT2260	644.709	825.672	3522.76	3757.73	2.31796	4.9863	4.9863	11.0953	8.9e-46	2.53e-43	Rv2204c	Rv2204c	Conserved protein
MT2719	90.3372	85.5307	251.375	689.373	2.24505	4.7405	4.7405	8.1253	1.5e-13	5.34e-12	Rv2641	cadI	Cadmium inducible protein CadI
MT0851	146.749	192.93	792.892	774.996	2.21926	4.6565	4.6565	8.8978	5.42e-30	5.84e-28	Rv0830	Rv0830	Possible S-adenosylmethionine-dependent methyltransferase
MT1608	70.645	56.7739	266.929	321.041	2.20908	4.6238	4.6238	7.48324	5e-29	4.75e-27	Rv1557	mmpL6	Probable conserved transmembrane transport protein MmpL6
MT1861	92.9369	219.421	524.794	829.356	2.20571	4.613	4.613	8.70295	2.97e-27	2.46e-25	Rv1813c	Rv1813c	Conserved hypothetical protein
MT2303	1067.6	1069.37	4560.01	5315.21	2.20406	4.6077	4.6077	11.5523	1.74e-48	5.32e-46	Rv2243	fabD	Malonyl CoA-acyl carrier protein transacylase FabD (malonyl CoA:ACPM acyltransferase) (MCT)
MT1923	32.0405	51.7808	163.607	202.509	2.15625	4.4575	4.4575	6.81479	4.04e-29	3.93e-27	Rv1874	Rv1874	hypothetical protein
MT2468	174.63	105.919	676.414	528.913	2.13651	4.397	4.397	8.53742	2.58e-29	2.57e-27	Rv2397c	cysA1	Sulfate-transport ATP-binding protein ABC transporter CysA1
MT2050	16.1177	52.8904	57.5958	254.31	2.0627	4.1777	4.1777	6.57473	1.41e-24	1.02e-22	Rv1994c	cmtR	Metal sensor transcriptional regulator CmtR (ArsR-SmtB family)
MT1376	111.134	130.145	429.717	585.101	2.06023	4.1705	4.1705	8.29514	2.47e-29	2.52e-27	Rv1334	mec	Possible hydrolase
MT2912	843.906	520.258	2976.15	2525.12	2.04859	4.137	4.137	10.7452	5.88e-31	7.1e-29	Rv2846c	efpA	Possible integral membrane efflux protein EfpA
MT2469	50.0429	35.1832	193.428	155.34	2.04617	4.1301	4.1301	6.76266	8.32e-29	7.71e-27	Rv2398c	cysW	Probable sulfate-transport integral membrane protein ABC transporter CysW
MT4032	203.291	172.957	831.601	591.318	1.90285	3.7395	3.7395	8.8134	5.76e-25	4.25e-23	Rv3913	trxB2	Probable thioredoxin reductase TrxB2 (TRXR) (TR)
MT4033	111.069	62.7842	414.982	227.922	1.88084	3.6829	3.6829	7.67436	8.64e-28	7.65e-26	Rv3914	trxC	Thioredoxin TrxC (TRX) (MPT46)
MT1729	62.0662	87.6112	309.614	225.484	1.83885	3.5772	3.5772	7.42033	4.47e-16	2.02e-14	Rv1690	lprJ	Probable lipoprotein LprJ
MT2780	1260.89	1181.94	4008.96	4676.85	1.82663	3.5471	3.5471	11.442	4.32e-32	5.38e-30	Rv2707	Rv2707	Probable conserved transmembrane alanine and leucine rich protein
MT2306	936.648	622.34	3110.4	2348.88	1.82383	3.5402	3.5402	10.777	1.9e-29	1.99e-27	Rv2246	kasB	3-oxoacyl-[acyl-carrier protein] synthase 2 KasB (beta-ketoacyl-ACP synthase) (KAS I)
MT1225	29.1159	74.8047	128.582	212.565	1.81729	3.5242	3.5242	6.79926	1.24e-18	6.78e-17	Rv1188	Rv1188	Probable proline dehydrogenase
MT2305	1818.7	1004.55	5193.85	4364.52	1.8165	3.5223	3.5223	11.596	3.74e-26	2.87e-24	Rv2245	kasA	3-oxoacyl-[acyl-carrier protein] synthase 1 KasA (beta-ketoacyl-ACP synthase) (KAS I)
MT1259	1345.89	2619.97	5111.75	8421.54	1.80477	3.4937	3.4937	12.095	1.46e-38	2.91e-36	Rv1221	sigE	Alternative RNA polymerase sigma factor SigE
MT2718	37.2397	79.428	132.616	267.351	1.79054	3.4595	3.4595	7.01412	1.85e-24	1.32e-22	Rv2640c	Rv2640c	Possible transcriptional regulatory protein (probably ArsR-family)
MT3874	199.132	236.481	875.923	637.572	1.78348	3.4426	3.4426	8.92889	3.92e-17	1.88e-15	Rv3767c	Rv3767c	Possible S-adenosylmethionine-dependent methyltransferase
MT2307	930.084	632.465	3134.32	2177.94	1.7683	3.4065	3.4065	10.7472	1.43e-28	1.29e-26	Rv2247	accD6	Acetyl/propionyl-CoA carboxylase (beta subunit) AccD6
MT1376.1	75.7143	85.6232	260.906	269.667	1.71953	3.2933	3.2933	7.43523	9.37e-24	6.44e-22	Rv1335	cysO	Sulfur carrier protein CysO
MT1041	702.486	511.058	2155.84	1800.89	1.71741	3.2884	3.2884	10.3361	2.12e-24	1.49e-22	Rv1013	pks16	Putative polyketide synthase Pks16
MT0397	340.292	996.549	1386.16	2571.19	1.69603	3.2401	3.2401	10.3703	3.81e-18	1.97e-16	Rv0384c	clpB	Probable endopeptidase ATP binding protein (chain B) ClpB (ClpB protein) (heat shock protein F84.1)
MT2094	11.3084	197.738	65.6065	367.844	1.68591	3.2174	3.2174	7.32882	4.78e-08	8.18e-07	Rv2034	Rv2034	ArsR repressor protein
MT2667	1514.61	2128.24	6536.45	5071.94	1.68109	3.2067	3.2067	11.8967	1.5e-18	8.06e-17	Rv2590	fadD9	Probable fatty-acid-CoA ligase FadD9 (fatty-acid-CoA synthetase) (fatty-acid-CoA synthase)
MT1518	369.278	293.763	1092.51	1016.08	1.67758	3.1989	3.1989	9.4367	6.18e-21	3.91e-19	Rv1472	echA12	Possible enoyl-CoA hydratase EchA12 (enoyl hydrase) (unsaturated acyl-CoA hydratase) (crotonase)
MT2048	100.216	327.421	282.307	1184.34	1.67633	3.1961	3.1961	8.88775	4.92e-19	2.72e-17	Rv1992c	ctpG	Probable metal cation transporter P-type ATPase G CtpG
MT0196	220.644	169.721	618.994	608.198	1.6648	3.1707	3.1707	8.65991	4.42e-19	2.48e-17	Rv0186A	mymT	copper-binding metallothionein
MT2779	1032.18	1350.69	2979.02	4540.77	1.63927	3.1151	3.1151	11.2737	3.66e-26	2.86e-24
MT0424	196.012	284.054	618.526	842.032	1.61262	3.0581	3.0581	8.9226	2.3e-19	1.31e-17	Rv0411c	glnH	Probable glutamine-binding lipoprotein GlnH (GLNBP)
MT2308	156.498	75.3133	458.076	235.235	1.59593	3.0229	3.0229	7.85402	7.38e-21	4.59e-19	Rv2248	Rv2248	Conserved hypothetical protein
MT2467	168.391	387.755	857.212	689.19	1.58757	3.0054	3.0054	9.03824	1.29e-07	2.02e-06	Rv2395B	aprB	Acid and phagosome regulated protein B AprB
MT1628	747.914	391.823	1907.38	1367.41	1.57673	2.9829	2.9829	10.1082	5.97e-18	3.05e-16	Rv1592c	Rv1592c	Conserved hypothetical protein
MT0425	372.852	570.559	1048.94	1765.73	1.56117	2.9509	2.9509	9.87593	6.33e-20	3.82e-18	Rv0412c	Rv0412c	Possible conserved membrane protein
MT1260	317.22	481.422	907.908	1441.33	1.54961	2.9274	2.9274	9.62035	1.76e-19	1.03e-17	Rv1222	rseA	Anti-sigma factor RseA
MT1224	137.651	265.191	423.928	735.567	1.54683	2.9217	2.9217	8.60987	8.11e-18	4.09e-16	Rv1187	rocA	Probable pyrroline-5-carboxylate dehydrogenase RocA
MT2304	1850.94	999.091	4216.89	3685.39	1.53543	2.8988	2.8988	11.3924	3.68e-17	1.79e-15	Rv2244	acpM	Meromycolate extension acyl carrier protein AcpM
MT0715	48.4182	123.765	181.851	276.554	1.52936	2.8866	2.8866	7.30159	1.54e-13	5.43e-12	Rv0687	Rv0687	Probable short-chain type dehydrogenase/reductase
MT2850	1422.45	3128.85	5369.56	6721.87	1.5096	2.8473	2.8473	12.0226	2.37e-16	1.09e-14	Rv2780	ald	Secreted L-alanine dehydrogenase Ald (40 kDa antigen) (TB43)
MT1960	76.6892	221.409	229.681	571.146	1.47332	2.7766	2.7766	8.10246	7.79e-17	3.65e-15	Rv1909c	furA	Ferric uptake regulation protein FurA (fur)
MT1377	202.771	221.686	616.128	559.079	1.46871	2.7677	2.7677	8.64391	7.83e-16	3.39e-14	Rv1336	cysM	Cysteine synthase B CysM (CSASE B) (O-phosphoserine sulfhydrylase B) (O-phosphoserine (thiol)-lyase B)
MT0817	170.276	155.99	522.572	385.456	1.46129	2.7536	2.7536	8.26991	8.35e-16	3.58e-14	Rv0178	Rv0178	Probable conserved Mce associated membrane protein
MT2698	1162.1	4481.3	3457.62	11261.6	1.45102	2.734	2.734	12.3137	3.56e-27	2.89e-25	Rv2623	TB31.7	Universal stress protein family protein TB31.7
MT2441	111.914	203.794	412.994	412.088	1.44802	2.7283	2.7283	8.15638	5.05e-11	1.42e-09	Rv2372c	Rv2372c	Conserved hypothetical protein
MT2600	3461.74	3504.49	10830.8	8298.01	1.44453	2.7217	2.7217	12.6715	1.36e-25	1.02e-23	Rv2524c	fas	Probable fatty acid synthase Fas (fatty acid synthetase)
MT1959	635.155	1420.41	1811.55	3626.09	1.43192	2.6981	2.6981	10.8715	1.58e-19	9.42e-18	Rv1908c	katG	Catalase-peroxidase-peroxynitritase T KatG
MT2061	141.55	659.188	536.196	1258.57	1.42497	2.6851	2.6851	9.34208	1.16e-09	2.75e-08	Rv2005c	Rv2005c	Universal stress protein family protein
MT3514	65.9007	123.442	189.101	310.376	1.42415	2.6836	2.6836	7.42887	8.8e-17	4.08e-15	Rv3406	Rv3406	Probable dioxygenase
MT3217	724.583	3307.64	2143.32	8041.38	1.42278	2.681	2.681	11.7954	8.44e-23	5.51e-21	Rv3131	Rv3131	Conserved protein
MT3933	4421.33	3614.53	13341.3	8598.33	1.4218	2.6792	2.6792	12.8715	2.09e-27	1.77e-25	Rv3825c	pks2	Polyketide synthase Pks2
MT2053	237.346	795.621	729.156	1844.1	1.4151	2.6668	2.6668	9.81646	6.19e-15	2.49e-13	Rv1997	ctpF	Probable metal cation transporter P-type ATPase A CtpF
MT2773	158.773	116.229	398.317	318.542	1.39065	2.622	2.622	7.95451	5.84e-16	2.58e-14	Rv2699c	Rv2699c	Conserved hypothetical protein
MT0198	228.248	343.001	567.479	944.414	1.38779	2.6168	2.6168	9.02482	1.37e-14	5.35e-13	Rv0188	Rv0188	Probable conserved transmembrane protein
MT1065	28.336	29.3578	78.646	71.4846	1.37736	2.5979	2.5979	5.70192	1.42e-11	4.37e-10	Rv1035c	Rv1035c	Probable transposase (fragment)
MT2668.1	127.967	145.31	488.131	254.797	1.37045	2.5855	2.5855	7.98956	2.07e-08	3.94e-07	Rv2591	PE_PGRS44	PE-PGRS family protein PE_PGRS44
MT3182	92.092	85.0222	214.771	243.401	1.36994	2.5846	2.5846	7.3121	7.67e-15	3.03e-13	Rv3098c	Rv3098c	Hypothetical protein
MT2572	316.18	811.109	887.209	1892.42	1.35494	2.5579	2.5579	9.93198	5.5e-15	2.24e-13	Rv2497c	bkdA	Probable branched-chain keto acid dehydrogenase E1 component, alpha subunit BkdA
MT0382	10.9834	32.363	37.6565	62.5871	1.34696	2.5437	2.5437	5.17065	1.08e-07	1.74e-06	Rv0366c	Rv0366c	Conserved hypothetical protein
MT0188	402.293	563.301	1284.18	1138.09	1.34424	2.539	2.539	9.72634	1.38e-11	4.26e-10	Rv0179c	lprO	Possible lipoprotein LprO
MT3300	252.684	411.01	686.296	964.89	1.33603	2.5246	2.5246	9.17699	7.55e-14	2.78e-12	Rv3205c	Rv3205c	Conserved protein
MT3350	223.958	218.311	604.2	514.897	1.33473	2.5223	2.5223	8.60895	1.11e-13	3.99e-12	Rv3252c	alkB	Probable transmembrane alkane 1-monooxygenase AlkB (alkane 1-hydroxylase) (lauric acid omega-hydroxylase) (omega-hydroxylase) (fatty acid omega-hydroxylase) (alkane hydroxylase-rubredoxin)
MT0423	328.074	399.082	806.399	1001.03	1.31211	2.483	2.483	9.30776	6.13e-14	2.28e-12	Rv0410c	pknG	Serine/threonine-protein kinase PknG (protein kinase G) (STPK G)
MT1514.1	93.0668	297.508	364.169	465.899	1.30473	2.4704	2.4704	8.25403	1.39e-06	1.74e-05	Rv1468c	PE_PGRS29	PE-PGRS family protein PE_PGRS29
MT0855	83.4482	627.888	343.177	917.599	1.28969	2.4448	2.4448	8.94595	1.17e-05	0.000118857	Rv0834c	PE_PGRS14	PE-PGRS family protein PE_PGRS14
MT1227	26.1263	28.988	59.9931	74.5317	1.28174	2.4313	2.4313	5.57008	2.98e-10	7.61e-09	Rv1190	Rv1190	Conserved hypothetical protein
MT0816	49.9129	33.3801	125.015	77.8226	1.27306	2.4167	2.4167	6.16234	2.22e-11	6.55e-10	Rv0791c	Rv0791c	conserved hypothetical protein
MT0600	39.9693	198.478	125.307	369.612	1.26454	2.4025	2.4025	7.51942	6.83e-10	1.66e-08
MT0595	32.2354	133.289	95.0769	263.512	1.2633	2.4004	2.4004	7.03513	6.25e-11	1.74e-09	Rv0569	Rv0569	Conserved protein
MT2816	45.8835	117.293	151.035	206.592	1.26209	2.3984	2.3984	7.02594	1.1e-08	2.21e-07	Rv2745c	clgR	Transcriptional regulatory protein ClgR
MT2442	346.206	568.433	963.574	1175.08	1.26182	2.398	2.398	9.57635	6.52e-12	2.06e-10	Rv2373c	dnaJ2	Probable chaperone protein DnaJ2
MT2783	1336.08	2161.52	3259.45	5062.92	1.25724	2.3904	2.3904	11.529	1.54e-18	8.17e-17	Rv2710	sigB	RNA polymerase sigma factor SigB
MT2702	519.797	2073.87	1311.2	4675.57	1.25359	2.3843	2.3843	11.0669	5.9e-16	2.59e-14	Rv2627c	Rv2627c	Conserved protein
MT1817	45.5586	42.2106	102.678	104.942	1.24333	2.3674	2.3674	6.20832	3.74e-11	1.07e-09	Rv1767	Rv1767	Conserved hypothetical protein
MT2462	201.472	297.508	559.176	589.611	1.22915	2.3443	2.3443	8.68667	1.29e-10	3.45e-09	Rv2392	cysH	Probable 3'-phosphoadenosine 5'-phosphosulfate reductase CysH (PAPS reductase, thioredoxin DEP.) (padops reductase) (3'- phosphoadenylylsulfate reductase) (PAPS sulfotransferase)
MT2701	487.106	2049.09	1253.95	4370.31	1.22805	2.3425	2.3425	10.9945	1.53e-14	5.92e-13	Rv2626c	hrp1	Hypoxic response protein 1 Hrp1
MT2112	111.329	175.546	299.03	358.52	1.22664	2.3402	2.3402	7.88396	7.16e-12	2.25e-10	Rv2052c	Rv2052c	Conserved protein
MT0265	278.226	612.261	568.707	1571.32	1.1962	2.2913	2.2913	9.56555	1.8e-11	5.44e-10	Rv0251c	hsp	Heat shock protein Hsp (heat-stress-induced ribosome-binding protein A)
MT0596	157.603	525.529	416.794	1043.2	1.19482	2.2892	2.2892	9.06583	2.46e-10	6.38e-09	Rv0570	nrdZ	Probable ribonucleoside-diphosphate reductase (large subunit) NrdZ (ribonucleotide reductase)
MT2218.1	59.2066	205.459	228.336	278.138	1.18755	2.2777	2.2777	7.59185	4.35e-05	0.000373615	Rv2160c	Rv2160c	Conserved hypothetical protein
MT2571	319.95	730.109	770.321	1568.15	1.18497	2.2736	2.2736	9.72664	4.24e-12	1.35e-10	Rv2496c	bkdB	Probable branched-chain keto acid dehydrogenase E1 component, beta subunit BkdB
MT1627	94.4966	35.553	168.928	103.235	1.18428	2.2725	2.2725	6.6529	2.15e-08	4.04e-07
MT1440	35.8099	49.6541	80.868	112.803	1.17945	2.2649	2.2649	6.12697	2.11e-10	5.53e-09	Rv1395	Rv1395	Transcriptional regulatory protein
MT3369	55.5022	239.579	186.061	368.271	1.17678	2.2607	2.2607	7.73125	1.25e-06	1.59e-05	Rv3269	Rv3269	Conserved protein
MT2461	929.629	1149.12	2036.2	2662.79	1.17181	2.2529	2.2529	10.7267	1.04e-13	3.75e-12	Rv2391	sirA	Ferredoxin-dependent sulfite reductase SirA
MT2218	129.267	460.063	453.808	667.129	1.17166	2.2527	2.2527	8.74046	9.29e-06	9.79e-05	Rv2159c	Rv2159c	Conserved protein
MT2063	664.271	2558.52	1827.16	4719.27	1.17099	2.2517	2.2517	11.2541	1.89e-11	5.65e-10	Rv2007c	fdxA	Ferredoxin FdxA
MT0599	94.2367	267.318	220.384	579.8	1.17063	2.2511	2.2511	8.18266	1.31e-11	4.09e-10	Rv0572c	Rv0572c	Hypothetical protein
MT1105	89.8823	183.637	248.744	330.974	1.15687	2.2297	2.2297	7.73759	2.72e-09	6.23e-08	Rv1075c	Rv1075c	Conserved exported protein
MT1186	61.5463	169.49	169.103	303.977	1.14634	2.2135	2.2135	7.46068	3.35e-09	7.41e-08	Rv1152	Rv1152	Probable transcriptional regulatory protein
MT3932	788.599	318.405	1653.67	736.237	1.13865	2.2018	2.2018	9.772	2.13e-11	6.33e-10	Rv3824c	papA1	Conserved polyketide synthase associated protein PapA1
MT2768	138.495	312.025	383.348	546.708	1.13738	2.1998	2.1998	8.43156	2.19e-08	4.09e-07	Rv2694c	Rv2694c	Conserved protein
MT2463	124.652	174.945	336.16	313.179	1.13461	2.1956	2.1956	7.89083	3.09e-09	6.96e-08	Rv2393	che1	Ferrochelatase Che1
MT1944	106.13	319.376	216.116	753.179	1.13298	2.1931	2.1931	8.44633	2.34e-10	6.1e-09	Rv1894c	Rv1894c	Conserved hypothetical protein
MT3639	36.1999	134.029	84.7856	274.786	1.12849	2.1863	2.1863	7.05066	9.79e-11	2.65e-09	Rv3535c	hsaG	Probable acetaldehyde dehydrogenase (acetaldehyde dehydrogenase [acetylating])
MT1958	40.2943	56.2653	88.0016	122.554	1.12488	2.1808	2.1808	6.26461	1.1e-09	2.62e-08	Rv1907c	Rv1907c	Hypothetical protein
MT3067	72.4648	206.291	171.442	412.819	1.11969	2.173	2.173	7.75405	9.87e-11	2.66e-09	Rv2989	Rv2989	Probable transcriptional regulatory protein
MT2529	1119.79	1130.81	2494.8	2389.04	1.11737	2.1695	2.1695	10.8007	9.57e-13	3.18e-11	Rv2454c	Rv2454c	Probable oxidoreductase (beta subunit)
MT0328.1	39.7094	62.1832	72.1555	159.728	1.11557	2.1668	2.1668	6.38453	3.09e-08	5.55e-07
MT3389	559.181	2488.48	1103.5	5862.29	1.10885	2.1567	2.1567	11.2897	5.89e-13	1.99e-11	Rv3290c	lat	Probable L-lysine-epsilon aminotransferase Lat (L-lysine aminotransferase) (lysine 6-aminotransferase)
MT0030	41.5941	49.4229	86.6568	110.061	1.10741	2.1546	2.1546	6.17063	3.28e-09	7.35e-08	Rv0027	Rv0027	Conserved hypothetical protein
MT2097	95.2115	110.866	201.264	242.061	1.10329	2.1484	2.1484	7.34387	7.44e-11	2.05e-09	Rv2037c	Rv2037c	Conserved transmembrane protein
MT0706.1	34.9001	169.906	78.8214	345.6	1.09688	2.1389	2.1389	7.29862	2.03e-10	5.35e-09	Rv0678	Rv0678	Conserved protein
MT3908	1374.17	1109.96	2764.36	2496.05	1.08877	2.1269	2.1269	10.919	3.62e-12	1.16e-10	Rv3801c	fadD32	Fatty-acid-AMP ligase FadD32 (fatty-acid-AMP synthetase) (fatty-acid-AMP synthase). Also shown to have acyl-ACP ligase activity.
MT0140	32.1055	57.6523	85.3704	97.8724	1.08216	2.1172	2.1172	6.0952	3.05e-07	4.44e-06	Rv0132c	fgd2	Putative F420-dependent glucose-6-phosphate dehydrogenase Fgd2
MT3388	59.4016	275.594	129.283	564.564	1.07722	2.11	2.11	8.00752	3.2e-10	8.11e-09	Rv3289c	Rv3289c	Possible transmembrane protein
MT2946	82.2784	97.8287	194.89	183.008	1.07295	2.1037	2.1037	7.12522	1.6e-09	3.76e-08	Rv2878c	mpt53	Soluble secreted antigen Mpt53 precursor
MT1809	101.061	155.758	237.984	293.069	1.07266	2.1033	2.1033	7.62263	7.66e-10	1.85e-08	Rv1760	Rv1760	Possible triacylglycerol synthase (diacylglycerol acyltransferase)
MT2460	31.1956	50.3938	78.646	88.914	1.0725	2.1031	2.1031	5.96347	1.72e-07	2.62e-06
MT2200	52.8375	60.7037	92.7964	151.257	1.06705	2.0951	2.0951	6.48377	1.16e-07	1.85e-06	Rv2142c	parE2	Possible toxin ParE2
MT2060	289.859	717.996	645.014	1416.47	1.06678	2.0948	2.0948	9.58394	6.18e-10	1.52e-08	Rv2004c	Rv2004c	Conserved protein
MT2047	26.9062	44.7534	49.3511	105.124	1.05799	2.082	2.082	5.82377	1.99e-07	2.98e-06
MT0597	130.112	226.217	255.936	496.492	1.05557	2.0785	2.0785	8.1153	1.28e-09	3.02e-08	Rv0571c	Rv0571c	Conserved protein
MT3776	136.481	203.378	342.359	350.659	1.05533	2.0782	2.0782	8.01307	2.72e-08	4.93e-07	Rv3675	Rv3675	Possible membrane protein
MT0589	271.012	348.087	532.571	760.37	1.05109	2.0721	2.0721	8.90121	3.34e-09	7.41e-08	Rv0563	htpX	Probable protease transmembrane protein heat shock protein HtpX
MT3638	55.5022	169.166	123.085	325.733	1.04489	2.0632	2.0632	7.39657	9.44e-10	2.27e-08	Rv3534c	hsaF	Probable 4-hydroxy-2-oxovalerate aldolase (HOA
MT2849	77.2091	113.178	185.534	200.437	1.04311	2.0607	2.0607	7.17193	1.45e-08	2.83e-07	Rv2779c	Rv2779c	Possible transcriptional regulatory protein (probably Lrp/AsnC-family)
MT3637	10.7235	33.4726	24.6171	62.2824	1.03761	2.0528	2.0528	5.03997	4.3e-06	4.9e-05	Rv3533c	PPE62	PPE family protein PPE62
MT2693	47.3783	90.7088	105.894	170.637	1.03379	2.0474	2.0474	6.69725	1.34e-08	2.64e-07	Rv2618	Rv2618	conserved hypothetical protein
MT3326	490.941	698.855	1167.53	1230.05	1.03249	2.0456	2.0456	9.80889	1.27e-08	2.53e-07	Rv3229c	desA3	Possible linoleoyl-CoA desaturase (delta(6)-desaturase)
MT0869	35.095	37.0787	76.3655	70.7533	1.02615	2.0366	2.0366	5.77939	2.72e-07	3.99e-06	Rv0846c	Rv0846c	Probable oxidase
MT2052	374.217	1413.61	641.272	3409.99	1.02462	2.0344	2.0344	10.5116	6.93e-09	1.44e-07	Rv1996	Rv1996	Universal stress protein family protein
MT3096	155.458	227.928	323.121	451.212	1.0202	2.0282	2.0282	8.17761	2.79e-09	6.35e-08	Rv3016	lpqA	Probable lipoprotein LpqA
MT3930	954.715	591.087	1971	1177.39	1.01998	2.0279	2.0279	10.1968	5.56e-10	1.38e-08	Rv3822	Rv3822	Conserved hypothetical protein
MT0814	54.5923	35.0445	102.444	76.5428	1.01688	2.0235	2.0235	6.07135	7.77e-08	1.28e-06	Rv0789c	Rv0789c	Hypothetical protein
MT3212	1129.41	4604.79	2431.53	8757.81	1.01669	2.0233	2.0233	12.0468	4.61e-14	1.73e-12	Rv3127	Rv3127	Conserved protein
MT3949	395.534	1385.14	1016.08	2204.2	1.01489	2.0207	2.0207	10.2881	2.16e-07	3.22e-06	Rv3841	bfrB	Bacterioferritin BfrB
MT0751	607.404	480.775	1300.55	909.982	1.00944	2.0131	2.0131	9.68785	3.37e-09	7.41e-08	Rv0726c	Rv0726c	Possible S-adenosylmethionine-dependent methyltransferase
MT3384	899.993	913.237	1912.18	1741.71	1.00931	2.0129	2.0129	10.4167	6.44e-10	1.58e-08	Rv3285	accA3	Probable bifunctional protein acetyl-/propionyl-coenzyme A carboxylase (alpha chain) AccA3: biotin carboxylase + biotin carboxyl carrier protein (BCCP)
MT2784	392.999	631.032	905.978	1103.41	1.00522	2.0073	2.0073	9.56694	2.68e-08	4.88e-07	Rv2711	ideR	Transcriptional regulatory protein ideR
MT0481	470.209	732.42	914.866	1515.56	1.00476	2.0066	2.0066	9.82714	2.42e-09	5.6e-08	Rv0465c	Rv0465c	Probable transcriptional regulatory protein
MT3525	955.365	1205.8	2202.15	2093.71	1.00032	2.0004	2.0004	10.6567	3.61e-09	7.91e-08	Rv3416	whiB3	Transcriptional regulatory protein WhiB-like WhiB3. Contains [4FE-4S] cluster.

## Sheet: Table S1C, Down <2x, p<0.05
Table S1C: Genes repressed (>2-fold, p<0.05) by AC2P20 vs. DMSO at pH 5.7
Gene	Counts per million (CPM)						AC2P20/DMSO
MT Number	DMSO_5A_1	DMSO_5B_2	AC2P20_5A_1	AC2P20_5A_2	Log2 Fold-change	Fold-change (fraction)	Fold-change (whole)	Log2 CPM	p-value	FDR	Rv Number	Gene Name	Gene Function
MT2118	86.3078	40.9623	4.21005	8.71467	-3.27122	0.1036	-9.6547	5.13485	4.46e-15	1.85e-13	Rv2058c	rpmB2	50S ribosomal protein L28 RpmB2
MT1163	624.302	678.698	119.928	83.1854	-2.70326	0.1535	-6.5127	8.55719	7.81e-37	1.25e-34	Rv1131	prpC	Probable methylcitrate synthase PrpC
MT0274	120.753	61.8133	11.2268	16.0277	-2.68182	0.1558	-6.4167	5.71552	2.58e-17	1.27e-15	Rv0261c	narK3	Probable integral membrane nitrite extrusion protein NarK3 (nitrite facilitator)
MT1162	769.361	978.934	161.97	130.232	-2.57868	0.1674	-5.9739	8.99516	2.56e-33	3.4e-31	Rv1130	prpD	Possible methylcitrate dehydratase PrpD
MT3581	289.339	186.041	43.9131	41.7451	-2.43844	0.1845	-5.4206	7.13306	2.43e-34	3.46e-32	Rv3477	PE31	PE family protein PE31
MT0537	738.881	1183.51	95.3692	314.216	-2.43111	0.1854	-5.3931	9.18777	8.03e-23	5.33e-21	Rv0516c	Rv0516c	Possible anti-anti-sigma factor
MT2526	961.344	406.017	199.86	67.6453	-2.42403	0.1863	-5.3667	8.67524	3.27e-37	5.67e-35	Rv2450c	rpfE	Probable resuscitation-promoting factor RpfE
MT1178	764.227	1976.27	122.968	431.589	-2.41394	0.1876	-5.3293	9.68645	4.86e-37	8.07e-35
MT1933	526.036	262.001	95.5446	52.6536	-2.38862	0.191	-5.2366	7.87128	1.14e-41	2.67e-39	Rv1885c	Rv1885c	Chorismate mutase
MT1934	1224.1	972.877	263.888	190.626	-2.28247	0.2055	-4.8651	9.37286	4.92e-36	0	Rv1886c	fbpB	Secreted antigen 85-B FbpB (85B) (antigen 85 complex B) (mycolyl transferase 85B) (fibronectin-binding protein B) (extracellular alpha-antigen)
MT0292	168.066	251.414	23.8569	74.9583	-2.2717	0.2071	-4.8289	7.01948	1.87e-20	1.15e-18	Rv0280	PPE3	PPE family protein PPE3
MT1161	128.162	134.353	27.4822	28.4598	-2.22994	0.2132	-4.6912	6.31755	1.29e-30	1.51e-28	Rv1129c	Rv1129c	Probable transcriptional regulator protein
MT0977	888.359	544.207	172.027	136.753	-2.18084	0.2205	-4.5342	8.76633	1.99e-30	2.27e-28	Rv0950c	Rv0950c	Conserved hypothetical protein
MT3580.2	92.8719	132.18	23.0968	25.9002	-2.18048	0.2206	-4.5331	6.10177	1.73e-27	1.5e-25
MT1430	92.8069	88.0735	18.4189	23.5844	-2.11466	0.2309	-4.3309	5.80362	6.48e-23	4.38e-21	Rv1386	PE15	PE family protein PE15
MT1449	89.2324	476.244	21.2841	140.532	-1.90646	0.2667	-3.7489	7.50822	2.78e-26	2.21e-24	Rv1405c	Rv1405c	Putative methyltransferase
MT1233	677.269	698.902	214.42	176.487	-1.82225	0.2828	-3.5363	8.7876	1.73e-22	1.11e-20	Rv1195	PE13	PE family protein PE13
MT1727	260.873	554.424	42.042	286.487	-1.78654	0.2899	-3.4499	8.16053	2.39e-08	4.42e-07	Rv1687c	Rv1687c	Probable conserved ATP-binding protein ABC transporter
MT0273	95.2765	75.3595	14.7936	41.5013	-1.76292	0.2947	-3.3938	5.82903	5.43e-07	7.57e-06	Rv0260c	Rv0260c	Possible transcriptional regulatory protein
MT1126	1563.42	3287.34	614.608	751.29	-1.73842	0.2997	-3.3367	10.6021	1.02e-17	5.07e-16	Rv1094	desA2	Possible acyl-[acyl-carrier protein] desaturase DesA2 (acyl-[ACP] desaturase) (stearoyl-ACP desaturase)
MT1745	84.618	75.3595	26.7806	21.939	-1.7194	0.3037	-3.293	5.70878	5.06e-17	2.4e-15	Rv1705c	PPE22	PPE family protein PPE22
MT1234	834.092	943.982	357.269	233.59	-1.61863	0.3256	-3.0708	9.21037	8.54e-14	3.12e-12	Rv1196	PPE18	PPE family protein PPE18
MT3716	913.576	890.814	278.272	323.966	-1.58704	0.3329	-3.0043	9.23311	2.25e-18	1.18e-16	Rv3614c	espD	ESX-1 secretion-associated protein EspD
MT1431	542.023	428.809	146.65	181.18	-1.56409	0.3382	-2.9569	8.34333	1.61e-14	6.17e-13	Rv1387	PPE20	PPE family protein PPE20
MT3582	265.682	336.344	96.4802	106.77	-1.5586	0.3395	-2.9457	7.65441	1.82e-19	1.05e-17	Rv3478	PPE60	PPE family protein PPE60
MT1746	66.3556	79.0581	22.9798	28.0332	-1.51238	0.3505	-2.8528	5.62207	4.59e-14	1.73e-12	Rv1706c	PPE23	PPE family protein PPE23
MT3947	52.3826	43.6438	18.0681	16.2105	-1.48206	0.358	-2.7935	5.03108	2.82e-11	8.2e-10	Rv3839	Rv3839	Conserved hypothetical protein
MT0272	53.2925	41.702	13.6242	21.6953	-1.44913	0.3662	-2.7304	5.03089	1.24e-07	1.96e-06	Rv0259c	Rv0259c	Conserved hypothetical protein
MT1722	90.0773	69.2105	33.0372	25.3518	-1.44776	0.3666	-2.7278	5.7691	4.76e-13	1.63e-11	Rv1682	Rv1682	Probable coiled-coil structural protein
MT3718	663.556	1337.98	275.699	433.661	-1.44663	0.3669	-2.7257	9.40493	3.66e-15	1.55e-13	Rv3616c	espA	ESX-1 secretion-associated protein A, EspA
MT2454	314.686	309.483	91.9193	143.64	-1.44015	0.3685	-2.7135	7.7486	5.36e-13	1.83e-11	Rv2386c	mbtI	Isochorismate synthase MbtI
MT2245	1403.67	980.876	495.207	397.645	-1.4029	0.3782	-2.6443	9.67853	5.17e-16	2.32e-14	Rv2190c	Rv2190c	Conserved hypothetical protein
MT3717	470.728	613.186	179.278	234.199	-1.39061	0.3814	-2.6219	8.54881	3.73e-15	1.57e-13	Rv3615c	espC	ESX-1 secretion-associated protein EspC
MT2445.1	88.4525	29.3578	27.7746	14.3822	-1.35926	0.3898	-2.5655	5.32405	9.52e-09	1.95e-07	Rv2377c	mbtH	Putative conserved protein MbtH
MT1726	110.744	277.582	29.2364	158.083	-1.3563	0.3906	-2.5603	7.1708	2.5e-08	4.61e-07	Rv1686c	Rv1686c	Probable conserved integral membrane protein ABC transporter
MT0777	105.48	217.109	47.8893	74.4098	-1.34439	0.3938	-2.5392	6.79959	1.08e-12	3.56e-11	Rv0753c	mmsA	Probable methylmalonate-semialdehyde dehydrogenase MmsA (methylmalonic acid semialdehyde dehydrogenase) (MMSDH)
MT0115	106.26	74.7585	27.3068	47.3517	-1.30547	0.4046	-2.4716	6.00056	2.37e-06	2.86e-05	Rv0106	Rv0106	Conserved hypothetical protein
MT0890	735.371	348.596	248.276	172.282	-1.29224	0.4083	-2.4491	8.55542	4.92e-11	1.4e-09	Rv0867c	rpfA	Possible resuscitation-promoting factor RpfA
MT0277	70.0601	130.608	31.9846	49.9113	-1.26156	0.4171	-2.3976	6.14587	4.97e-11	1.4e-09	Rv0264c	Rv0264c	Conserved hypothetical protein
MT0276	106.78	208.556	50.9299	77.335	-1.25167	0.42	-2.3812	6.79535	1.48e-11	4.51e-10	Rv0263c	Rv0263c	Conserved hypothetical protein
MT1419	272.831	434.311	114.256	183.556	-1.24904	0.4207	-2.3768	7.97382	2.08e-13	7.27e-12	Rv1375	Rv1375	Conserved hypothetical protein
MT1585.1	3268.45	2190.05	1274.06	999.505	-1.24546	0.4218	-2.3709	10.9167	5e-15	2.05e-13
MT3116	158.383	96.0256	67.4777	40.7091	-1.23435	0.425	-2.3527	6.5038	2.35e-11	6.89e-10	Rv3032	Rv3032	Alpha (1->4) glucosyltransferase
MT2449	445.122	217.618	181.675	97.4458	-1.2264	0.4274	-2.3398	7.8799	4.74e-13	1.63e-11	Rv2381c	mbtD	Polyketide synthetase MbtD (polyketide synthase)
MT3233	78.6389	53.2602	31.3414	24.9252	-1.21202	0.4317	-2.3166	5.5591	4.27e-09	9.24e-08	Rv3145	nuoA	Probable NADH dehydrogenase I (chain A) NuoA (NADH-ubiquinone oxidoreductase chain A)
MT2981	86.3078	102.128	47.1291	34.9805	-1.20842	0.4327	-2.3108	6.08274	1.65e-08	3.17e-07	Rv2913c	Rv2913c	Possible D-amino acid aminohydrolase (D-amino acid hydrolase)
MT2244	80.0687	46.2791	33.0372	21.3296	-1.19834	0.4358	-2.2948	5.50066	1.08e-08	2.17e-07	Rv2189c	Rv2189c	Conserved hypothetical protein
MT1390	307.277	157.746	111.917	82.5151	-1.1971	0.4362	-2.2928	7.36591	2.57e-10	6.6e-09	Rv1348	irtA	Iron-regulated transporter IrtA
MT1569	82.2784	65.5581	30.6398	33.8836	-1.18795	0.4389	-2.2783	5.73347	2.35e-08	4.38e-07	Rv1519	Rv1519	Conserved hypothetical protein
MT1801	88.3875	146.281	42.3343	59.1744	-1.18514	0.4398	-2.2739	6.39582	3.97e-10	9.96e-09
MT1447	56.347	158.44	20.9333	81.9666	-1.18041	0.4412	-2.2664	6.31477	4.35e-09	9.38e-08	Rv1403c	Rv1403c	Putative methyltransferase
MT3115	244.95	136.572	95.6031	68.2547	-1.18001	0.4413	-2.2658	7.09211	3.41e-11	9.85e-10	Rv3031	Rv3031	Conserved protein
MT2640	195.492	91.4485	77.4765	45.5844	-1.17168	0.4439	-2.2527	6.68068	3.34e-10	8.43e-09	Rv2564	glnQ	Probable glutamine-transport ATP-binding protein ABC transporter GlnQ
MT2450	191.658	110.08	82.2128	51.6176	-1.15737	0.4483	-2.2305	6.76803	7.08e-11	1.96e-09	Rv2382c	mbtC	Polyketide synthetase MbtC (polyketide synthase)
MT3750.1	5137.46	1638.81	1722.73	985.184	-1.15552	0.4489	-2.2276	11.2113	6.3e-09	1.31e-07	Rv3648c	cspA	Probable cold shock protein A CspA
MT1725	53.0975	121.685	15.7292	80.9306	-1.15384	0.4494	-2.2251	6.08802	8.54e-06	9.07e-05	Rv1685c	Rv1685c	Conserved hypothetical protein
MT0258	1629.77	1839	670.333	953.921	-1.11423	0.4619	-2.1648	10.3145	8.1e-11	2.21e-09	Rv0244c	fadE5	Probable acyl-CoA dehydrogenase FadE5
MT1586	967.258	563.393	392.236	298.31	-1.10995	0.4633	-2.1584	9.11737	2.07e-09	4.83e-08	Rv1535	Rv1535	Unknown protein
MT2446	132.971	68.4246	56.6017	34.6149	-1.10922	0.4635	-2.1573	6.19462	4.9e-09	1.04e-07	Rv2378c	mbtG	Lysine-N-oxygenase MbtG (L-lysine 6-monooxygenase) (lysine N6-hydroxylase)
MT1392	118.478	54.0924	51.2807	26.9362	-1.10893	0.4636	-2.1569	5.97225	8.07e-09	1.67e-07	Rv1349	irtB	Iron-regulated transporter IrtB
MT3114	198.287	112.438	75.1376	64.3545	-1.10344	0.4654	-2.1487	6.81568	3.08e-08	5.55e-07	Rv3030	Rv3030	Conserved protein
MT1823	84.2931	156.591	40.3463	71.2409	-1.10009	0.4665	-2.1437	6.46404	3.91e-09	8.51e-08	Rv1773c	Rv1773c	Probable transcriptional regulatory protein
MT0604	30.6757	151.829	11.8115	84.2824	-1.09299	0.4688	-2.1332	6.12617	1.01e-07	1.63e-06	Rv0575c	Rv0575c	Possible oxidoreductase
MT0845	510.698	883.833	269.969	380.094	-1.06884	0.4767	-2.0977	8.99805	4.97e-09	1.05e-07	Rv0823c	Rv0823c	Possible transcriptional regulatory protein
MT1406	612.668	871.627	348.615	349.135	-1.06684	0.4774	-2.0948	9.09186	3.76e-08	6.57e-07	Rv1361c	PPE19	PPE family protein PPE19
MT3510	184.704	152.06	71.6292	90.4375	-1.05726	0.4805	-2.081	6.96373	1.14e-07	1.82e-06	Rv3402c	Rv3402c	Conserved hypothetical protein
MT0466	951.271	685.54	413.754	365.041	-1.05518	0.4812	-2.078	9.23843	4.95e-09	1.05e-07	Rv0450c	mmpL4	Probable conserved transmembrane transport protein MmpL4
MT2448	943.797	411.703	395.627	229.019	-1.05072	0.4827	-2.0716	8.95162	2.12e-08	4e-07	Rv2380c	mbtE	Peptide synthetase MbtE (peptide synthase)
MT0776	46.3384	77.7174	27.3068	31.385	-1.03834	0.4869	-2.0539	5.51871	3.26e-06	3.78e-05	Rv0752c	fadE9	Probable acyl-CoA dehydrogenase FadE9
MT3580	148.114	102.498	61.5719	58.5041	-1.03794	0.487	-2.0533	6.5357	9.23e-08	1.51e-06	Rv3476c	kgtP	Probable dicarboxylic acid transport integral membrane protein
MT0255	182.949	131.948	80.9849	70.8143	-1.03703	0.4873	-2.052	6.86767	9.96e-09	2.03e-07	Rv0241c	htdX	Probable 3-hydroxyacyl-thioester dehydratase HtdX
MT0467	224.933	243.323	107.649	121.457	-1.03267	0.4888	-2.0458	7.44685	4.58e-10	1.14e-08	Rv0451c	mmpS4	Probable conserved membrane protein MmpS4
MT0444	119.583	68.7482	49.9358	39.4293	-1.03242	0.4889	-2.0455	6.11934	1.9e-07	2.87e-06	Rv0429c	def	Probable polypeptide deformylase Def (PDF) (formylmethionine deformylase)
MT0846	1549.32	2832.82	887.91	1194.03	-1.02493	0.4914	-2.0349	10.6584	2.44e-09	5.62e-08	Rv0824c	desA1	Probable acyl-[acyl-carrier protein] desaturase DesA1 (acyl-[ACP] desaturase) (stearoyl-ACP desaturase) (protein Des)
MT3749	1202.27	637.874	525.905	352.792	-1.02388	0.4918	-2.0334	9.40897	1.56e-08	3e-07	Rv3646c	topA	DNA topoisomerase I TopA (omega-protein) (relaxing enzyme) (untwisting enzyme) (swivelase) (type I DNA topoisomerase) (nicking-closing enzyme) (TOPO I)
MT1389	77.4041	44.2448	28.1254	29.5567	-1.02188	0.4925	-2.0306	5.4895	4.13e-05	0.000357729	Rv1347c	mbtK	Lysine N-acetyltransferase MbtK
MT0417	131.476	64.6797	55.023	37.9057	-1.01616	0.4944	-2.0225	6.17708	4.22e-07	5.98e-06	Rv0404	fadD30	fatty acid AMP ligase / lipid degradation
MT3583	360.504	265.423	145.539	160.703	-1.01609	0.4945	-2.0224	7.86512	9.43e-08	1.54e-06	Rv3479	Rv3479	Possible transmembrane protein
MT3235	96.6413	63.9862	42.5098	35.6509	-1.0151	0.4948	-2.021	5.90207	3.15e-07	4.57e-06	Rv3147	nuoC	Probable NADH dehydrogenase I (chain C) NuoC (NADH-ubiquinone oxidoreductase chain C)
MT3227	572.049	495.662	219.039	320.127	-1.00737	0.4975	-2.0102	8.65046	1.76e-06	2.16e-05	Rv3140	fadE23	Probable acyl-CoA dehydrogenase FadE23
MT0302	821.029	371.527	338.032	224.936	-1.00265	0.4991	-2.0037	8.77795	2.97e-07	4.336e-06	Rv0289	espG3	ESX-3 secretion-associated protein EspG3

## Sheet: S1D, AC2P20 vs. DMSO
Table S1D: All Genes in AC2P20 vs. DMSO at pH 5.7
Gene	Counts per million (CPM)				AC2P20/DMSO
MT Number	DMSO_5A_1	DMSO_5B_2	AC2P20_5A_1	AC2P20_5A_2	Log2 Fold-change	Log2 CPM	LR	p-value	FDR	Rv Number	Gene Name	Gene Function
MT0001	972.588	506.434	645.014	436.404	-0.403826	9.32237	4.90777	0.0267361686708517	0.0771487	Rv0001	dnaA	chromosomal replication initiator protein
MT0002	374.412	276.519	254.123	221.279	-0.440372	8.13795	6.45861	0.0110415949676898	0.0392513	Rv0002	dnaN	DNA polymerase III, [beta] subunit
MT0003	89.4923	99.1232	95.8955	71.9722	-0.181097275781572	6.47967	0.798321657690806	0.371595640460296	0.542421	Rv0003	recF	DNA replication and SOS induction
MT0004	38.4096	44.9383	41.1064	36.626	-0.0994822872900432	5.33603	0.207892441586125	0.648424325469842	0.778183	Rv0004	Rv0004	conserved hypothetical protein
MT0005	1070.53	898.859	969.772	1051.31	0.0417407194418997	9.96249	0.0570829696393957	0.811167287033054	0.885132	Rv0005	gyrB	DNA gyrase subunit B
MT0006	957.185	718.273	856.335	685.168	-0.114364037371265	9.65167	0.465886187004685	0.494886	0.654972	Rv0006	gyrA	DNA gyrase subunit A
MT0007	172.941	176.193	243.832	174.232	0.239711136589057	7.5843	1.71291	0.190608539298088	0.340769	Rv0007	Rv0007	possible conserved membrane protein
MT0009	10.5935	6.84246	10.1158	7.06924	-0.0110989624191082	3.12977	0.0016079750779987	0.968013748953747	0.981311
MT0010	69.4102	61.952	58.9991	47.1079	-0.314650133932483	5.89434	2.71096	0.0996609	0.214328	Rv0008c	CwsA	cell wall synthesis protein
MT0011	1294.49	1085.87	1184.95	1389.65	0.114207163480019	10.2748	0.410368047636666	0.521782758019938	0.676663	Rv0009	ppiA	peptidyl-prolyl cis-trans isomerase
MT0012	28.271	22.7003	16.8402	16.8199	-0.589645806434024	4.41059	5.58313	0.0181343075845665	0.0579048
MT0013	78.9638	47.8047	45.3165	38.0276	-0.566833936334243	5.71764	7.26141	0.0070452116864981	0.0275247	Rv0010c	Rv0010c	probable conserved membrane protein
MT0014	178.14	136.71	143.726	125.967	-0.213961156588917	7.19219	1.57304	0.209766222372187	0.36503	Rv0011c	crgA	cell division protein
MT0015	191.398	239.856	285.231	396.487	0.650575245357401	8.12077	14.3482	0.000151928018233255	0.0011359	Rv0012	Rv0012	probable conserved membrane protein
MT0016	239.426	150.627	213.192	188.737	0.0786538936396497	7.63	0.185616918336564	0.666589934183754	0.788706	Rv0013	pabA/trpG	possible glutamine amidotransferase
MT0017	418.801	294.549	287.92	241.024	-0.415061090666833	8.27926	5.54745	0.0185076008895684	0.058861	Rv0014c	pknB	serine-threonine protein kinase
MT0018	247.095	248.409	179.921	188.432	-0.428131410951491	7.75545	6.55619	0.0104519826147338	0.0377635	Rv0015c	pknA	serine-threonine protein kinase
MT0019	319.43	279.801	276.401	279.783	-0.104356090259552	8.17474	0.365964445339844	0.545212250820433	0.69481	Rv0016c	pbpA	penicillin-binding protein
MT0020	247.875	192.236	163.782	157.717	-0.441688383028605	7.57372	6.63477	0.0100007022948232	0.0365984	Rv0017c	rodA	FtsW/RodA/SpovE family
MT0021	375.582	413.044	318.794	394.354	-0.151522	8.55291	0.745543541610232	0.387890850217673	0.558833	Rv0018c	pstP	putative phosphoprotein phosphatase
MT0022	217.719	229.176	180.096	278.626	0.00494028829778686	7.82347	0.000704075251292124	0.978831082974796	0.989187	Rv0019c	fhaB	Signal transduction
MT0023	1975.59	2179.69	1872.89	2755.18	0.130581356349909	11.1006	0.639427826139581	0.423918065562911	0.591703	Rv0020c	fhAa	Signal transduction
MT0024	88.5175	71.0599	66.9514	61.1245	-0.310091768022799	6.17033	2.76915	0.0960970301625003	0.208237	Rv0021c	Rv0021c	conserved hypothetical protein
MT0026	116.529	140.548	65.8989	101.102	-0.647363284609854	6.72996	12.4801	0.000411310610766077	0.00264113	Rv0022	whiB5	transcriptional regulator
MT0027	136.806	189.092	95.3107	132.244	-0.518607602578962	7.11374	9.57288	0.00197472736437662	0.00991094	Rv0023	Rv0023	putative transcriptional regulator/ might be involved in hypoxia related stress responses
MT0028	58.6217	60.7037	45.258	51.9833	-0.297989684079563	5.76182	2.3004	0.129340811232253	0.258228	Rv0024	Rv0024	putativesecreted protein p60 related
MT0029	92.6119	64.6335	52.801	60.0885	-0.457557372705907	6.07968	4.57524	0.0324371832021812	0.0900782	Rv0025	Rv0025	conserved hypothetical protein
MT0030	41.5941	49.4229	86.6568	110.061	1.10741	6.17063	35.0089	3.28208934198761e-09	7.34782e-08	Rv0026	Rv0026	conserved hypothetical protein
MT0030.1	18.1324	14.7483	29.2949	30.7756	0.877128915482622	4.54429	12.4842	0.000410398030429358	0.00264113	Rv0027	Rv0027	conserved hypothetical protein
MT0031	54.3973	92.8817	80.4586	118.41	0.455999270950015	6.43733	6.0243	0.0141102314590422	0.0476116	Rv0028	Rv0028	conserved hypothetical protein
MT0033	14.9479	10.1712	16.08	10.9695	0.107077048792631	3.71596	0.170043305304943	0.680073	0.796522	Rv0029	Rv0029	conserved hypothetical protein
MT0034	32.8854	38.928	34.2651	31.385	-0.126761953137222	5.10809	0.320709761247361	0.571181416359361	0.714874	Rv0030	Rv0030	conserved hypothetical protein
MT0035	16.3777	13.2226	16.9571	13.2853	0.028593437135879	3.91322	0.0123124214393993	0.911646994764318	0.948318	Rv0031	Rv0031	possible remnant of transposase
MT0036	13.1281	15.7654	15.9631	17.0027	0.194027825016105	3.96188	0.566810100484355	0.451529289079744	0.615208
MT0037	58.6867	49.7928	48.0647	36.0775	-0.376048252488296	5.59296	3.57052	0.0588138045596822	0.143479	Rv0032	bioF2	C-terminal similar to B. subtilis BioF
MT0038	10.2036	4.85445	4.56088	3.04709	-0.930093898301553	2.52512	9.22518	0.00238709296982338	0.0114886	Rv0033	acpA	possible acyl carrier protein
MT0039	13.5831	5.40924	4.91172	3.41274	-1.08664	2.78868	11.9398	0.000549459406379631	0.00340528	Rv0034	Rv0034	hypothetical protein
MT0040	53.2925	25.4743	28.3009	19.0138	-0.671519086708473	4.98211	8.2365	0.00410563256561456	0.0179335	Rv0035	fadD34	acyl-CoA synthase
MT0041	155.198	169.12	177.465	168.443	0.093608888258328	7.3895	0.307924778736886	0.578956424583281	0.720982	Rv0036c	Rv0036c	conserved hypothetical protein
MT0042	113.799	171.709	153.55	198.975	0.321660191631533	7.31861	3.56936	0.0588550458707826	0.143479	Rv0037c	Rv0037c	probableconserved integral membrane protein
MT0043	164.557	244.757	206.292	278.199	0.255073877688069	7.80462	2.3123	0.128353746659986	0.256643	Rv0038	Rv0038	conserved protein
MT0044	51.9277	64.2636	114.197	78.1882	0.708723886193473	6.27161	9.79629	0.0017486447654476	0.00896827	Rv0039c	Rv0039c	possibleconserved transmembrane protein
MT0046	405.738	416.095	558.006	502.282	0.365600907842987	8.87848	4.3076	0.0379423914607032	0.102162	Rv0040c	mtc28	secreted proline rich protein
MT0047	653.288	516.236	547.306	508.985	-0.137892605048561	9.12039	0.616715851675664	0.432270320536894	0.599999	Rv0041	leuS	leucyl-tRNA synthase
MT0048	172.031	95.7944	92.8549	70.2049	-0.670074633272933	6.75239	12.6851	0.000368586779963446	0.0024198	Rv0042c	Rv0042c	putative transcriptional regulator
MT0049	78.8339	56.6814	57.3034	51.9223	-0.293660492680728	5.93751	2.28313	0.130787990579914	0.260465	Rv0043c	Rv0043c	HTH type transcriptional regulator (GntR family)
MT0050	51.4077	44.3373	58.9406	53.2631	0.230945	5.70299	1.36477	0.242712236982232	0.40334	Rv0044c	Rv0044c	possible oxidoreductase
MT0051	379.156	374.994	536.079	440.974	0.366689712014571	8.75792	4.27175	0.0387510738593426	0.103989	Rv0045c	Rv0045c	probable esterase
MT0052	2130.98	2274.89	3041.47	3168.42	0.495602495901375	11.374	11.5875	0.000663968290771645	0.00398481	Rv0046c	ino1	myo-inositol-1-phosphate synthase
MT0053	863.013	1190.03	1209.45	1507.76	0.414086528880465	10.22	6.36849	0.011616445246806	0.0408215	Rv0047c	Rv0047c	conserved hypothetical protein
MT0054	106.325	116.784	112.443	140.288	0.173088	6.89571	0.970984423961113	0.324434789082017	0.495733	Rv0048c	Rv0048c	possible membrane protein
MT0055	290.899	375.827	433.401	512.886	0.511740606552386	8.65595	8.58588	0.00338779856027302	0.0154446	Rv0049	Rv0049	conserved hypothetical protein
MT0056	667.391	750.497	880.893	987.622	0.398268435297039	9.68249	5.6689	0.0172682519128423	0.055765	Rv0050	ponA1	penicillin-bonding protein
MT0057	163.257	125.938	147.819	133.219	-0.0311754407382677	7.15644	0.0331001216720068	0.855634216825277	0.915111	Rv0051	Rv0051	probable membrane protein
MT0058	80.5886	62.9691	70.5767	65.2076	-0.0705491950673304	6.12802	0.143441	0.704884096069159	0.814664	Rv0052	Rv0052	conserved hypothetical protein
MT0059	588.232	647.722	560.638	763.417	0.0840484772113645	9.32219	0.221556434914476	0.637856543554439	0.76956	Rv0053	rpsF	30S ribosomal protein S6
MT0060	313.711	291.683	317.215	388.199	0.214436844227149	8.35671	1.37154	0.241547297513943	0.402411	Rv0054	ssb	single strand binding protein
MT0061	184.639	129.96	163.081	162.044	0.0695058923638475	7.32218	0.142982035471903	0.705334279952418	0.814948	Rv0055	rpsR1	30S ribosomal protein S18
MT0062	518.367	316.001	453.925	405.445	0.0838571099936652	8.72631	0.190235203570751	0.662720931710807	0.787005	Rv0056	rplI	50S ribosomal protein L9
MT0063	206.476	136.017	171.852	122.98	-0.205274029030151	7.31677	1.49608	0.221275054393919	0.377636	Rv0057	Rv0057	T-cell immunogen
MT0064	746.744	450.816	370.25	307.146	-0.783042	8.87294	17.1982	3.36757937556261e-05	0.000300219	Rv0058	dnaB	DNA helicase (contains intein)
MT0065	73.9595	33.8887	35.0837	22.6703	-0.831681489322272	5.37447	13.4173	0.000249315245767605	0.00173389	Rv0059	Rv0059	hypothetical protein
MT0066	347.051	345.174	300.55	390.088	-0.0152574182943429	8.43391	0.0069602703374585	0.933511038756578	0.958885	Rv0060	Rv0060	hypothetical protein
MT0066.1	618.258	437.779	424.922	454.869	-0.242866095771288	8.91903	1.51432	0.218481741654734	0.3745
MT0066.2	77.729	159.411	92.3286	123.102	-0.0651042829310827	6.82387	0.107016751847908	0.743566423861413	0.839646
MT0067	541.568	459.092	439.248	356.082	-0.334323986380949	8.81092	3.6879	0.0548086248256162	0.135576	Rv0062	celA1	cellulase/endoglucanase
MT0068	138.495	169.859	182.143	175.025	0.218701189867235	7.37938	1.56729	0.210600698515647	0.365843	Rv0063	Rv0063	TAT SIGNAL PEPTIDE CONTATININGprobable oxidoreductase
MT0069	30.9356	53.5376	40.4632	77.396	0.461248119947838	5.66408	5.3371	0.0208761654065814	0.0643112
MT0070	450.841	1036.08	778.683	2108.77	0.907153284771912	10.095	28.659	8.63115218222524e-08	1.42129e-06	Rv0064	Rv0064	probable conserved transmembrane protein
MT0071	100.671	127.695	136.125	240.598	0.676253997236668	7.24203	13.3447	0.000259157122009166	0.00178985	Rv0065	vapC1	possible toxin VapC1
MT0072	426.015	461.912	415.625	645.373	0.223809712478331	8.92879	1.36173	0.243238601607368	0.403736	Rv0066c	icd2	isocitrate dehydrogenase
MT0073	39.7094	48.9143	38.5336	49.9722	-0.0057948475555504	5.47261	0.000791357944935456	0.977557601610428	0.988472	Rv0067c	Rv0067c	possible transcriptional regulator (TetR/AcrR family)
MT0074	25.7364	21.5907	18.0096	17.3684	-0.414250206024818	4.37759	2.85277	0.0912164309864003	0.200384	Rv0068	Rv0068	probable oxidoreductase
MT0075	52.5126	30.976	30.172	21.939	-0.650163278256493	5.08726	8.48829	0.00357439086185421	0.0160224	Rv0069c	sdaA	L-lysine dehydratase/ involved in gluconeogenesis
MT0076	34.4451	20.7123	22.8629	20.2327	-0.31433	4.62393	1.55524	0.212364173326649	0.368367	Rv0070c	glyA2	serine hydroxymethyltransferase
MT0077	5.19927	7.21232	5.73034	7.43489	0.0895515245860326	2.70435	0.0961366442993632	0.756516015476052	0.848499	Rv0071	Rv0071	group II intron maturase
MT0078	121.338	78.7345	81.1603	67.2797	-0.404067081106991	6.44668	4.42873	0.0353387165019754	0.0964553	Rv0072	Rv0072	putative glutamine ABC-transporter permease
MT0079	117.178	88.5821	104.549	64.5373	-0.309880794490513	6.55179	2.83367	0.0923071296243735	0.201805	Rv0073	Rv0073	putative glutamine ABC-transporter permease
MT0080	61.3513	49.6541	60.0516	49.3628	-0.0197075734106927	5.78686	0.0102756234823298	0.919257742528649	0.952184	Rv0074	Rv0074	conserved hypothetical protein
MT0081	71.7499	57.5136	57.4788	51.8005	-0.235484904071281	5.90068	1.52234	0.217265472626464	0.373513	Rv0075	Rv0075	probable aminotransferase
MT0082	68.1754	60.1489	41.8666	44.914	-0.561928405961674	5.75195	7.81818	0.00517233939267598	0.0215154	Rv0076c	Rv0076c	unknown
MT0083	62.3262	115.443	49.1757	96.0441	-0.302919659539755	6.33792	2.71186	0.0996044967144094	0.214322	Rv0077c	Rv0077c	probable oxidoreductase
MT0084	16.7026	24.0873	11.3437	12.6759	-0.745118464106091	4.0308	8.03371	0.00459146930195152	0.0194856	Rv0078	Rv0078	transcriptional regulator (TetR/AcrR family)
MT0085	170.016	215.815	203.369	289.534	0.341545632403467	7.78004	4.11891	0.0424063435311949	0.111397	Rv0078A	Rv0078A	hypothetical protein
MT0085.1	46.6634	135.832	97.7666	155.95	0.627112872853477	6.77076	8.12796	0.00435877468505591	0.0186571	Rv0078B	Rv0078B	conserved protein
MT0086	1249.97	2403.32	1897.21	2798.32	0.410599290605303	11.0274	6.35889	0.0116794418428711	0.0409585	Rv0079	DATIN/Rv0079	putative dormancy associated translation inhibitor
MT0087	296.293	617.948	524.209	682.669	0.482674549500829	9.05098	5.51761	0.0188260087425406	0.0596808	Rv0080	Rv0080	conserved hypothetical protein
MT0088	31.9105	46.4178	37.2472	49.6675	0.159330920598554	5.37282	0.563867158611519	0.452706288478936	0.616343	Rv0081	Rv0081	predicted to response to early hypoxia responses/ , is a regulatory hub,transcriptional regulator (ArsR family)
MT0089	70.645	116.183	79.2892	96.166	-0.055043043946985	6.50315	0.0806080221908587	0.776475122882255	0.863352	Rv0082	Rv0082	probable oxidoreductase subunit
MT0090	68.5003	137.728	93.2642	106.039	0.0309242620035716	6.66573	0.0201846048781249	0.887022712883124	0.934916	Rv0083	Rv0083	probable oxidoreductase subunit
MT0091	97.5512	123.395	86.5983	95.8004	-0.268992665580133	6.65771	2.20469	0.137591890066234	0.271169	Rv0084	hycD	formate hydrogenlyase subunit 4
MT0092	21.5769	33.2414	21.1087	22.4875	-0.301398891793885	4.62892	1.44504	0.229326030603146	0.387067	Rv0085	hycP	putative formate hydrogen lyase hycP
MT0093	123.353	145.68	113.028	101.651	-0.323007787111835	6.91952	3.10039	0.0782735472629104	0.179989	Rv0086	hycQ	probable formate hydrogenlyase subunit
MT0096	123.223	204.626	183.956	282.891	0.522234718160047	7.63515	9.73188	0.00181099448943295	0.00922866	Rv0088	Rv0088	hypothetical protein
MT0098	68.1104	78.642	88.7618	116.338	0.474157751797118	6.46063	6.48169	0.0108991	0.0390089	Rv0089	Rv0089	possible methyltransferase
MT0099	13.7781	17.6609	16.8402	17.734	0.145300241957144	4.05527	0.319645662673377	0.571820666539213	0.715	Rv0090	Rv0090	possible membrane protein
MT0099.1	8.05886	8.92294	7.19216	8.10525	-0.150972802002823	3.03368	0.295979835570191	0.586413748885439	0.72735
MT0100	129.787	83.7276	110.806	93.1799	-0.0374139496253747	6.70694	0.040785552604973	0.839952425508329	0.903431	Rv0091	mtn	bifunctional nucleosidase
MT0101	224.933	232.967	310.549	290.997	0.392999497253212	8.04969	5.34987	0.0207238065378801	0.0640658	Rv0092	ctpA	cation-transporting ATPase
MT0102	44.7137	57.3287	50.8714	65.2076	0.185933963197736	5.77216	0.905349102035254	0.341351457864875	0.512156	Rv0093c	Rv0093c	hypothetical protein
MT0103	12.5432	18.4469	27.5992	26.6925	0.829384432935861	4.42194	9.93576	0.00162098067719088	0.00840001	Rv0094c	Rv0094c	conserved hypothetical protein
MT0105	43.8688	38.6044	34.7329	58.8088	0.138823566748034	5.4629	0.301171047378062	0.583149208983834	0.725296	Rv0096	PPE1	PPE-family protein
MT0106	62.5212	40.0376	35.3176	45.6453	-0.316550774514688	5.52277	1.53197	0.215817650295222	0.371665	Rv0097	Rv0097	possible oxidoreductase
MT0107	23.4617	15.5805	15.7292	19.1357	-0.139199349663286	4.2151	0.244273	0.621136929871313	0.756489	Rv0098	fcoT	fatty acyl CoA thoesterase type III
MT0108	68.6303	51.9195	49.7019	58.6869	-0.143659843405999	5.84137	0.443384600456199	0.505493360477931	0.663244	Rv0099	fadD10	acyl-CoA synthase
MT0109	13.7781	8.738	8.36162	8.40996	-0.389466658037668	3.31024	1.80956	0.178561	0.325212	Rv0100	Rv0100	hypothetical protein
MT0110	205.696	152.152	158.871	149.673	-0.198253026196588	7.38111	1.29078	0.255905013445034	0.418115	Rv0101	nrp	probable peptide synthetase
MT0111	226.623	190.895	214.829	208.482	0.0250618250408771	7.71639	0.022015864914664	0.882045	0.931919	Rv0102	Rv0102	probable conserved integral membrane protein
MT0112	466.959	517.068	442.23	543.783	-0.00281735541698651	8.94435	0.000258254283039605	0.987178314051671	0.994238	Rv0103c	ctpB	cation transport ATPase
MT0113	15.7278	13.0377	12.4547	10.7867	-0.304950832141133	3.71271	1.37409	0.241111145735108	0.401852	Rv0104	Rv0104	conserved hypothetical protein
MT0115	106.26	74.7585	27.3068	47.3517	-1.30547	6.00056	22.2686	2.37054338165096e-06	2.85666e-05	Rv0106	Rv0106	putative metal chaeperon
MT0116	328.594	303.287	301.895	237.124	-0.238606601979334	8.19396	1.86335	0.172239002825754	0.317168	Rv0107c	ctpI	probable magnesium transport ATPase
MT0117	292.914	376.428	281.722	300.869	-0.189944975411977	8.29053	1.14919	0.283719595565783	0.450672	Rv0108c	Rv0108c	hypothetical protein
MT0118	42.634	57.2362	43.4453	42.1107	-0.209397919035515	5.53878	0.962685047306326	0.326511307938052	0.497701	Rv0109	PE_PGRS1	PE_PGRS-family protein
MT0119	31.8455	39.6215	36.5455	32.8476	-0.0374280215920611	5.14322	0.0275224611469724	0.868236474924274	0.923878	Rv0110	Rv0110	probable rhomboidprotease 1
MT0120	293.953	234.077	232.254	193.612	-0.306864458659955	7.89834	3.41855	0.0644675375172918	0.154204	Rv0111	Rv0111	possible acyltransferase
MT0121	219.409	112.207	302.889	156.681	0.473349010920879	7.6285	8.31774	0.00392597093611995	0.0172873	Rv0112	gca	probable GDP-mannose dehydratase
MT0122	343.281	149.794	463.573	183.556	0.363716424886808	8.15549	4.49737	0.0339471182419853	0.0931034	Rv0113 / Rv0114	gmhA/ gmhB	phosphoheptose isomerase
MT0123	219.604	84.5136	263.186	90.7422	0.182873809322208	7.36273	1.15197	0.283136396606324	0.450598	Rv0115	hddA	possible D-alpha-D-heptose-7-phosphate kinase
MT0124	131.606	76.9777	104.433	76.4819	-0.172322799422205	6.60684	0.857483071476008	0.354443995942452	0.524104
MT0125	185.549	391.638	348.264	667.312	0.838229955698251	8.63776	22.4778	2.12580890341656e-06	2.58273e-05	Rv0116c	idtA	probable L,D-transpeptidase
MT0125.1	44.5837	41.8869	37.1303	36.565	-0.229832151407612	5.32751	1.20456	0.272413170165531	0.437905	Rv0117	oxyS	transcriptional regulator (LysR family)
MT0126	36.1349	30.19	37.0133	34.3102	0.109640103964242	5.10922	0.254597319254941	0.613856405910541	0.749684	Rv0118c	oxcA	oxalyl-CoA decarboxylase
MT0127	60.4415	45.077	42.1005	39.3074	-0.359819330417492	5.54953	3.04721	0.0808758253326164	0.184166	Rv0119	fadD7	acyl-CoA synthase
MT0128	215.64	189.878	211.73	210.98	0.0628888813273506	7.69463	0.140162361847068	0.708119655989337	0.816704	Rv0120c	fusA2	elongation factor G
MT0129	55.8271	58.2534	72.3309	89.0968	0.494171835579801	6.10818	6.96236	0.00832419534786958	0.0314128	Rv0121c	Rv0121c	predicted Pyridoxal 5' phosphateoxidase topology
MT0131	63.431	76.3304	100.106	116.338	0.632887230004791	6.47835	11.7771	0.000599624076432131	0.00367471	Rv0123	Rv0123	hypothetical protein
MT0132	4.2244	10.1712	8.36162	8.65372	0.345180385684135	2.99886	1.07645	0.299493843225378	0.467849	Rv0124	PE_PGRS2	PE_PGRS-family protein
MT0133	361.869	398.434	537.073	490.276	0.434336757196805	8.80421	5.87714	0.0153386976547174	0.0505581	Rv0125	pepA	probable serine protease
MT0134	436.608	292.423	440.827	366.93	0.170547399645902	8.58606	0.897438532071206	0.343469464569149	0.513415	Rv0126	treS	trehalose synthase
MT0135	258.728	194.363	243.481	194.221	-0.0443894779678865	7.79961	0.0711347486038263	0.789691696725743	0.871714	Rv0127	mak	maltokinase
MT0136	140.445	73.9725	111.8	79.468	-0.114126144005634	6.66546	0.362832179886851	0.546937507232848	0.695931	Rv0128	Rv0128	probable conserved transmembrane protein
MT0137	623.067	758.588	1383.23	1291.78	0.959146065323481	9.98623	29.3578	6.01737647951714e-08	1.00753e-06	Rv0129c	fbpC	antigen 85C, mycolytransferase
MT0138	51.2128	48.1284	47.0122	42.1107	-0.158107643482685	5.56161	0.626428702537059	0.428668323285637	0.597063	Rv0130	htdZ	conserved hypothetical protein
MT0139	118.933	142.49	170.682	230.116	0.606766551710279	7.37212	12.6624	0.00037307888131357	0.00244526	Rv0131c	fadE1	acyl-CoA dehydrogenase
MT0140	32.1055	57.6523	85.3704	97.8724	1.08216	6.0952	26.2179	3.04980510306358e-07	4.43557e-06	Rv0132c	fgd2	putative F420-dependent glucose-6 -phosphate dehydrogenase
MT0141	162.412	159.781	162.964	150.465	-0.0409381326620544	7.31306	0.0598781760692404	0.806688591858567	0.881935	Rv0133	Rv0133	GCN5-related N-acetyltransferase
MT0142	146.099	227.882	150.918	239.867	0.0604793947748887	7.57985	0.135439411183061	0.712857621517318	0.819365	Rv0134	ephF	probable epoxide hydrolase
MT0143	269.257	323.537	281.839	535.19	0.396827347940574	8.46175	3.87885	0.0488980297122671	0.124193	Rv0135c	Rv0135c	putative transcriptional regulator
MT0144	73.1147	104.717	148.58	194.038	0.955733	7.02483	31.0529	2.51096701586199e-08	4.61115e-07	Rv0136	cyp138	cytochrome p450
MT0145	188.473	182.481	304.936	307.878	0.724404174445393	7.94277	18.5441	1.66020729374391e-05	0.000160102	Rv0137c	msrA	putative peptide methionine sulfoxide reductase
MT0146	54.7873	41.6095	37.0718	32.1163	-0.468752147985899	5.37512	4.82015	0.0281288536059279	0.0802387	Rv0138	Rv0138	conserved hypothetical protein
MT0147	86.7627	57.5136	57.4788	45.1578	-0.472115891873269	5.95019	6.11696	0.0133891188398075	0.0457988	Rv0139	Rv0139	possible oxidoreductase
MT0148	154.288	300.467	2546.61	3953.17	3.88038	10.7638	450.566	5.43210158161219e-100	1.08235e-96	Rv0140	Rv0140	conserved protein
MT0149	145.059	203.517	90.1067	114.083	-0.761419060433814	7.11201	20.2953	6.6363515386623e-06	7.26535e-05	Rv0141c	Rv0141c	unknown
MT0150	53.6824	74.5273	336.336	572.608	2.79607	8.01886	227.125	2.52572e-51	1.0065e-48	Rv0142	Rv0142	predicted DNAglycolase, effected by DNA methylation
MT0151	353.225	228.899	170.098	141.872	-0.872462206910751	7.80493	24.3534	8.01832264576755e-07	1.07225e-05	Rv0143c	Rv0143c	probable chloride channel
MT0152	464.229	360.154	440.827	406.786	0.0505028677770994	8.70771	0.0808259215436351	0.776181252233044	0.863352	Rv0144	Rv0144	putative transcriptional regulator
MT0153	1276.68	1943.81	2416.62	2721.23	0.702859	11.0291	17.8295	2.41608368727469e-05	0.000221845	Rv0145	Rv0145	putative S-adenosylmethionine dependent methyltarnsferase
MT0154	900.448	1350.37	2088.53	1749.15	0.793359	10.572	15.0897	0.000102519204165297	0.000799489	Rv0146	Rv0146	putative S-adenosylmethionine dependent methyltarnsferase
MT0155	802.572	821.511	1124.9	1062.52	0.429091723161724	9.89631	6.62975	0.0100289599840459	0.0365984	Rv0147	Rv0147	possible aldehyde dehydrogenase
MT0156	317.935	406.479	638.348	473.395	0.612475572314606	8.84284	8.30894	0.00394504391253158	0.017333	Rv0148	Rv0148	putative short chain type dehydrogenase/reductase
MT0157	328.659	263.897	432.348	303.368	0.298414	8.37578	2.89871	0.0886507026199893	0.196372	Rv0149	Rv0149	possibel quinone oxidoreductase
MT0160	57.7768	50.9023	60.8118	52.5318	0.0596475660759571	5.79736	0.0944463486640217	0.758598865172121	0.850356	Rv0151c	PE1	PE-family protein
MT0161	43.7388	32.9178	40.5217	29.7396	-0.128215	5.20293	0.370265711033738	0.542859468486993	0.692476	Rv0152c	PE2	PE-family protein
MT0162	141.095	125.938	183.605	150.221	0.317132958633183	7.2319	3.53175	0.0602040570518004	0.145933	Rv0153c	ptbB	putative protein-tyrosine-phosphatase
MT0163	325.604	285.58	407.965	399.717	0.405235110857464	8.47094	5.35554	0.0206565057545695	0.0639101	Rv0154c	fadE2	acyl-CoA dehydrogenase
MT0165	425.105	239.301	249.094	165.396	-0.652357400484174	8.07584	14.0297	0.000179941131824107	0.00131331	Rv0157	pntB	pyridine transhydrogenase subunit [beta]
MT0167	145.774	115.12	79.5231	92.9361	-0.591038886247678	6.76084	9.18556	0.00243931687588345	0.0117117	Rv0158	Rv0158	transcriptional regulator (TetR/AcrR family)
MT0168	66.2256	56.6352	42.6267	41.6232	-0.539808387047861	5.69739	7.23677	0.00714254155947341	0.0277068	Rv0159c	PE3	PE-family protein
MT0169	17.2226	15.5342	17.4249	22	0.261959625974842	4.18187	1.02188	0.312072765617207	0.481779	Rv0160c	PE4	PE-family protein
MT0171	55.6321	47.3886	44.7317	37.9057	-0.318317701057298	5.53994	2.53305	0.111484210428714	0.232478	Rv0162c	adhE1	alcohol dehydrogenase (Zn)
MT0172	46.2085	44.2448	26.6636	32.7257	-0.612708652118019	5.23186	7.86282	0.00504617203201273	0.0210565	Rv0163	Rv0163	conserved protein
MT0173	633.92	479.111	568.765	449.323	-0.124549947118154	9.05767	0.499762558149598	0.479604470651153	0.64103	Rv0164	TB18.5	conserved hypothetical protein
MT0175	68.2404	48.0359	49.1757	30.7146	-0.557918920265441	5.619	7.96216	0.00477654823245462	0.0201424	Rv0166	fadD5	acyl-CoA synthase
MT0176	146.684	105.133	113.73	133.584	-0.0105194567489939	6.9644	0.00263883080145888	0.959031047264597	0.975352	rv0167	yrbE1A	conserved integral membrane protein
MT0177	28.7259	17.8459	16.2555	13.1634	-0.632176619836505	4.25517	6.27282	0.0122603846707919	0.042596	Rv0168	yrbE1B	conserved integral membrane protein
MT0178	219.994	156.544	174.308	167.955	-0.117252343559532	7.49024	0.428838	0.512559734080919	0.668155	Rv0169	mce1	cell invasion protein
MT0179	128.487	89.1369	166.998	158.936	0.606081951207454	7.08727	11.1086	0.000859261965674948	0.00495537	Rv0170	mce1B	part of mce1 operon
MT0180	196.987	131.671	186.528	139.496	0.00207686961499201	7.3555	0.000148302260996047	0.990283648595286	0.994561	Rv0171	mce1C	part of mce1 operon
MT0181	267.827	159.688	245.937	168.26	-0.0241005479320291	7.71782	0.0203461785218337	0.886574480340297	0.934916	Rv0172	mce1D	part of mce1 operon
MT0182	130.567	68.9331	125.892	85.6841	0.129429010838725	6.68448	0.489814151571892	0.48401	0.64566	Rv0173	lprK	part of mce1 operon
MT0183	547.678	519.333	509.708	435.672	-0.178539800652957	8.97502	1.03367	0.309299056681953	0.478291	Rv0174	mce1F	part of mce1 operon
MT0184	494.255	377.167	405.1	364.066	-0.169016711049783	8.68036	0.913401	0.339213621751075	0.509716	Rv0175	Rv0175	mce associated conserved hypothetical protein
MT0185	131.541	132.18	156.766	110.548	-0.00223217876867841	7.05392	0.000144729582416403	0.990401392343403	0.994561	Rv0176	Rv0176	mce associated conserved hypothetical protein
MT0186	290.119	205.967	199.977	168.016	-0.415452	7.7557	5.90722	0.0150789414934775	0.0498669	Rv0177	Rv0177	mce associated conserved hypothetical protein
MT0187	421.92	379.803	444.218	394.476	0.0644895333134447	8.68023	0.138993361441429	0.709283804954926	0.816855	Rv0178	Rv0178	probable mce associated membrane protein
MT0188	402.293	563.301	1284.18	1138.09	1.34424	9.72634	45.7006	1.3778204147335e-11	4.25629e-10	Rv0179c	lprO	lipoprotein
MT0189	292.264	220.114	282.775	262.598	0.103454127740456	8.04733	0.351280320357006	0.553389265073466	0.700971	Rv0180c	Rv0180c	conserved hypothetical protein
MT0190	60.6364	68.8407	74.1436	86.2935	0.308165146654032	6.18174	2.7822	0.0953169110431836	0.206996	Rv0181c	Rv0181c	conserved hypothetical protein
MT0191	214.275	262.649	292.598	388.747	0.507743391189778	8.17831	8.8415	0.00294456461015777	0.0137886	Rv0182c	sigG	sigma-70 factors ECF subfamily
MT0192	192.763	174.853	141.153	129.623	-0.440666555557893	7.31934	6.95453	0.00836074269168539	0.0315209	Rv0183	Rv0183	hemolytic phospholipase
MT0193	183.989	177.673	174.074	157.412	-0.127328915391186	7.43797	0.591273414032599	0.441927119463945	0.60937	Rv0184	Rv0184	conserved hypothetical protein
MT0194	67.2655	59.5479	55.6077	52.5927	-0.226801629493153	5.87932	1.41661	0.233962990460934	0.393393	Rv0185	Rv0185	conserved hypothetical protein
MT0195	293.304	226.495	229.564	199.158	-0.269575868422957	7.89017	2.58729	0.107724550784554	0.226415	Rv0186	bglS	[beta]-glucosidase
MT0196	220.644	169.721	618.994	608.198	1.6648	8.65991	79.67	4.42474943339491e-19	2.48347e-17	Rv0186A	mymT	copper-binding Metallothionein
MT0197	55.5022	68.0085	78.529	83.3683	0.396429142845221	6.15922	4.40419	0.0358507422640071	0.097386	Rv0187	Rv0187	probable o-methyltransferase
MT0198	228.248	343.001	567.479	944.414	1.38779	9.02482	59.2777	1.36921156710783e-14	5.34932e-13	Rv0188	Rv0188	Early hypoxia induced antigen/ probable conserved transmembrane protein
MT0199	433.294	412.859	479.828	486.498	0.192001277190866	8.82409	1.2121	0.270917356559856	0.43691	Rv0189c	ilvD	dihydroxy-acid dehydratase
MT0200	88.8424	111.144	211.906	172.77	0.944176	7.19254	23.4935	1.25339313851252e-06	1.59577e-05	Rv0190	RicR	copper metalloregulatory repressor
MT0201	107.365	98.5684	182.318	124.687	0.551592	7.00382	9.13776	0.00250386953700936	0.0119639	Rv0191	Rv0191	probable efflux protein
MT0202	243.326	265.839	354.229	304.77	0.369302215307318	8.19058	4.2686	0.0388227919504087	0.104041	Rv0192	Rv0192	conserved hypothetical protein
MT0203	41.7891	32.2705	35.7854	24.4986	-0.30988	5.07436	2.00037	0.157261013326256	0.298138	Rv0193c	Rv0193c	hypothetical protein
MT0204	33.4703	30.5137	32.6278	30.2271	-0.0251632484464153	4.99185	0.0134773826038277	0.907579526141635	0.946949	Rv0194	Rv0194	Probable ABC transporter drug
MT0205	4.87431	5.03938	3.50837	3.96121	-0.408233529219974	2.15864	1.82543	0.176668046865611	0.322798	Rv0195	Rv0195	transcriptional regulator (LuxR/UhpA family)/ under hypoxia and reductive stress
MT0206	53.0325	54.416	39.7615	45.5844	-0.334904905680611	5.59447	2.86844	0.0903324873557687	0.198771	Rv0196	Rv0196	transcriptional regulator (TetR/AcrR family)
MT0207	264.643	256.361	192.434	189.773	-0.446767103738223	7.81967	7.29681	0.00690770539808392	0.0270937	Rv0197	Rv0197	possible oxidoreductase
MT0208	780.15	650.172	752.487	839.899	0.158707342855092	9.56182	0.773315502794446	0.379193325271821	0.550486	Rv0198c	zmp1	probable zinc metalloprotease
MT0209	83.8381	68.6095	63.8524	62.8919	-0.259080851510741	6.12733	1.9153	0.166375251645735	0.309671	Rv0199	OmamA (orphaned mam protein A	mce associated membrane protein , required for cholesterol tarnsport and stablizing protein components of mce1 transport
MT0210	87.2177	87.3338	75.2546	67.5234	-0.292080504177431	6.31198	2.51364	0.112865128812822	0.234498	Rv0200	Rv0200	possible membrane protein
MT0211	168.911	153.909	177.641	176.609	0.135663754963164	7.40408	0.668801107569834	0.413469907970032	0.582013	Rv0201c	Rv0201c	hypothetical protein
MT0212	681.559	621.415	727.402	707.229	0.140277600448298	9.41892	0.665674734288586	0.414563668223094	0.583346	Rv0202c	mmpL11	conserved large membrane protein
MT0213	101.451	117.847	102.62	79.0414	-0.280017123122142	6.64913	1.93743	0.163947397742391	0.30601	Rv0203	Rv0203	heme uptake protein
MT0214	159.747	198.524	183.02	205.313	0.122084632430487	7.54513	0.532928180322884	0.465378	0.627167	Rv0204c	Rv0204c	probable conserved transmembrane protein
MT0215	63.756	45.4469	38.4167	32.8476	-0.600034892200202	5.49892	8.15313	0.00429868018686671	0.0184906	Rv0205	Rv0205	probable conserved transmembrane protein
MT0216	1132.53	817.026	1233.08	908.763	0.138109941151962	9.99852	0.702610584826147	0.401907887846391	0.570672	Rv0206c	mmpL3	conserved large membrane protein
MT0217	169.301	146.142	238.043	178.559	0.390369013519917	7.51661	5.39009	0.0202514712279272	0.0629011	Rv0207c	Rv0207c	conserved hypothetical protein
MT0218	175.085	139.808	247.925	212.808	0.553945788268779	7.59995	11.0257	0.000898572734358335	0.00514485	Rv0208c	Rv0208c	hypothetical methytransferase
MT0219	70.84	87.1489	64.9633	69.5954	-0.225313	6.19502	1.47347	0.224799031991316	0.381852	Rv0209	Rv0209	hypothetical protein
MT0220	53.8774	55.0171	52.2163	41.6841	-0.222801971591895	5.66725	1.18014	0.277327230051928	0.443301	Rv0210	Rv0210	hypothetical protein
MT0221	3292.69	3867.61	3021.76	3590.02	-0.115662745691149	11.7495	0.724042884304254	0.394820963291666	0.564536	Rv0211	pckA	phosphoenolpyruvate carboxykinase
MT0222	46.8584	48.7756	40.5217	49.8503	-0.0880699398974425	5.54278	0.187710481495291	0.664829034440141	0.788026	Rv0212c	nadR	similar to E.coli NadR
MT0223	37.8896	30.6524	28.5348	30.5927	-0.205353153679686	5.00104	0.834718212747282	0.360912	0.530713	Rv0213c	Rv0213c	possible methyltransferases
MT0224	90.4672	52.3818	59.4669	52.8365	-0.297657	5.99728	2.04729	0.152477750783603	0.291986	Rv0214	fadD4	acyl-CoA synthase
MT0225	66.2256	61.6284	60.344	65.7561	-0.0198633638574018	5.99092	0.0111767456823344	0.915804409194687	0.951583	Rv0215c	fadE3	acyl-CoA dehydrogenase
MT0226	38.6695	37.8185	36.5455	26.6315	-0.293163400499607	5.13069	1.70471	0.191673130924686	0.342059	Rv0216	Rv0216	Double hotdog hydratase
MT0227	35.29	34.9058	46.0766	44.3046	0.364218973292168	5.33101	3.00555	0.0829796141277356	0.187563	Rv0217c	lipW	probable esterase
MT0228	30.8706	32.0856	29.2364	28.277	-0.130629401277684	4.91813	0.343150333980859	0.558016409463502	0.704147	Rv0218	Rv0218	possible conserved transmembrane protein
MT0229	7.66892	6.70376	7.19216	5.48475	-0.190006924899047	2.78109	0.439291412702122	0.507464658670149	0.66412	Rv0219	Rv0219	possible conserved transmembrane protein
MT0230	595.511	529.366	687.582	547.379	0.127843731787177	9.20473	0.537180666039887	0.463603504167165	0.625833	Rv0220	lipC	probable esterase
MT0231	164.167	104.625	137.47	98.4209	-0.172469312406045	6.98033	1.01704	0.313222206591035	0.482859	Rv0221	Rv0221	Diacylglycerol )-acyltransferase
MT0232	74.5445	60.7962	74.6698	53.1412	-0.0954813604631793	6.04209	0.261492612365098	0.609096559670601	0.746157	Rv0222	echA1	enoyl-CoA hydratase/isomerase superfamily
MT0233	57.0619	52.8441	51.69	54.2991	-0.0513913767819921	5.75713	0.0679706915466838	0.794314693293826	0.874404	Rv0223c	Rv0223c	aldehyde dehydrogenase (possible betB)
MT0234	56.0221	35.0907	30.8152	25.5955	-0.660057340811428	5.20863	8.88893	0.00286905099859893	0.0134666	Rv0224c	Rv0224c	Possible methyltransferase
MT0235	126.407	106.613	98.8776	71.3018	-0.467006901086465	6.65696	6.56211	0.0104172959021827	0.0377635	Rv0225	Rv0225	possible involved in LPS synthesis
MT0236	72.0098	67.0838	56.4848	37.662	-0.590421910337843	5.86862	8.23813	0.0041019477266884	0.0179335	Rv0226c	Rv0226c	possible conserved transmembrane protein
MT0237	555.931	375.642	383.29	289.778	-0.455521005838132	8.6484	6.74703	0.00939036320981954	0.0345847	Rv0227c	Rv0227c	possibly involed in lipoarabinomannan synthesis
MT0238	57.6469	66.1129	57.8881	65.5123	-0.00364286902773436	5.95208	0.000382361193914438	0.984399	0.992368	Rv0228	Rv0228	probable integral membrane acyltransferase
MT0239	166.311	159.688	106.654	133.584	-0.448586925171862	7.14645	6.31462	0.0119746521446134	0.0417855	Rv0229c	Rv0229c	possible conserved membrane protein with PIN domain
MT0240	138.625	161.121	154.251	205.374	0.252548566982969	7.36595	2.18317	0.139526570146114	0.274033	Rv0230c	php	probable phosphotriestaerse
MT0241	244.235	140.779	124.898	101.712	-0.718937022871622	7.25738	14.9077	0.000112899770884308	0.000868544	Rv0231	fadE4	acyl-CoA dehydrogenase
MT0242	154.353	217.202	143.843	214.088	-0.0610281508199273	7.51175	0.135828089956696	0.712464194091292	0.819149	Rv0232	Rv0232	transcriptional regulator (TetR/AcrR family)
MT0244	62.2612	77.9948	65.9574	82.9417	0.0859772656937513	6.17811	0.218596	0.640111695675766	0.771347	Rv0233	nrdB	ribonucleoside-diphosphate reductase B2
MT0245	161.567	199.263	192.142	265.95	0.333622	7.67839	3.94044	0.0471385733100718	0.120802	Rv0234c	gabD1	succinate-semialdehyde dehydrogenase
MT0246	44.1288	51.8732	37.0133	54.7866	-0.0852616572618605	5.55674	0.171513813544315	0.678769923229442	0.795922	Rv0235c	Rv0235c	probable conserved transmembrane protein
MT0247	213.105	174.02	178.225	118.044	-0.408469	7.41751	5.75386	0.0164524778689855	0.0536523	Rv0236c	aftD	arabinofuranosyltransferase
MT0250	408.402	315.585	194.247	192.941	-0.890965629260208	8.11844	24.3665	7.96423167954751e-07	1.0686e-05	Rv0236A	Rv0236A	small secreted protein
MT0251	156.693	128.62	141.68	93.7893	-0.299962766388189	7.02575	2.92364	0.0872905619073161	0.193898	Rv0237	lpqI	beta-hexosaminidase precursorBETA-HEXOSAMINIDASE A
MT0252	90.7272	139.993	112.794	158.509	0.246022045533744	6.97306	2.02859	0.154363961963596	0.293998	Rv0238	Rv0238	transcriptional regulator (TetR/AcrR family)
MT0253	196.012	209.019	210.21	207.263	0.0442555012184322	7.68469	0.0709893157017518	0.789901746906823	0.871714	Rv0239	VapB24	possible antitoxin
MT0254	35.42	24.8733	28.2424	30.4709	-0.0168141447858918	4.89962	0.00476765667012558	0.944951237136364	0.965414	Rv0240	VapC24	possible toxin
MT0255	182.949	131.948	80.9849	70.8143	-1.03703	6.86767	32.8484	9.96347922026886e-09	2.02574e-07	Rv0241c	htdX	probable 3-hydroxylacyl-thioester dehydratase
MT0256	209.53	248.085	119.752	118.227	-0.938382553492119	7.44324	30.3346	3.63573646216381e-08	6.38256e-07	Rv0242c	fabG4	3-oxoacyl-[ACP] reductase
MT0257	671.29	566.814	351.597	305.44	-0.912491927929569	8.88844	27.0494	1.98318247400507e-07	2.98134e-06	Rv0243	fadA2	acetyl-CoA C-acetyltransferase
MT0258	1629.77	1839	670.333	953.921	-1.11423	10.3145	42.2328	8.10294956255307e-11	2.21166e-09	Rv0244c	fadE5	acyl-CoA dehydrogenase
MT0259	120.558	175.315	146.007	194.221	0.211591073088041	7.31424	1.58416	0.208162441848108	0.363032	Rv0245	Rv0245	probable monooxygenase
MT0260	68.6303	54.7859	45.3749	43.5124	-0.464619585157547	5.73292	5.33653	0.0208829907990467	0.0643112	Rv0246	Rv0246	probable conserved integral membrane protein
MT0261	462.93	247.854	346.042	181.85	-0.433231304944707	8.275	6.36302	0.0116523106734818	0.0409114	Rv0247c	Rv0247c	prabable succinate dehydrogenase
MT0262	1119.6	619.797	805.113	499.417	-0.393727986477469	9.57189	5.34372	0.0207969958784993	0.0641455	Rv0248c	Rv0248c	prabable succinate dehydrogenase
MT0263	817.909	430.566	506.141	353.95	-0.487804	9.04229	6.78816	0.00917643499391508	0.0338593	Rv0249	Rv0249c	prabable succinate dehydrogenase
MT0264	51.6677	67.6849	67.7116	143.518	0.741313250160529	6.3707	12.1695	0.00048578359359363	0.00305339	Rv0250c	Rv0250c	hypothetical protein
MT0265	278.226	612.261	568.707	1571.32	1.1962	9.56555	45.1755	1.80144172501935e-11	5.43844e-10	Rv0251c	hsp	Heat shock protein Hsp (heat-stress-induced ribosome-binding protein A)
MT0266	502.054	483.225	291.429	396.913	-0.533977986659028	8.70916	7.95473	0.00479617981178531	0.0202038	Rv0252	nirB	nitrite reductase flavoprotein
MT0267	37.4997	35.8304	52.4501	43.878	0.387939427847644	5.41014	3.33485	0.0678266694600271	0.160886	Rv0254c	cobU	cobalamine biosynthesis
MT0268	119.323	69.904	116.595	69.5954	-0.0199831073058507	6.55377	0.0125446673634508	0.910821044327669	0.948318	Rv0255c	cobQ1	cobyric acid synthase
MT0269	159.747	104.995	146.65	87.878	-0.189690803505964	6.96481	1.19042	0.275244380590652	0.440856	Rv0256c	PPE2	PPE-family protein
MT0270	130.762	75.6369	93.732	60.698	-0.399464426562688	6.49666	4.6441	0.031160410251236	0.0872623
MT0270.1	11.4384	14.5171	13.5072	17.3684	0.249395472521561	3.84053	0.926571259124368	0.335755469021173	0.506237	Rv0257	Rv0257	conserved hypothetical protein
MT0270.2	6.49908	13.6849	26.1958	25.6565	1.43845	4.17975	21.7823	3.05397109400148e-06	3.58999e-05
MT0271	49.328	47.8047	32.7448	42.3545	-0.381242781874618	5.43208	3.0305	0.0817126	0.185436	Rv0258c	Rv0258c	conserved hypothetical protein
MT0272	53.2925	41.702	13.6242	21.6953	-1.44913	5.03089	27.9539	1.24239709807395e-07	1.9569e-06	Rv0259c	Rv0259c	conserved hypothetical protein
MT0273	95.2765	75.3595	14.7936	41.5013	-1.76292	5.82903	25.1033	5.43394005826356e-07	7.57142e-06	Rv0260c	Rv0260c	orphan response regulator
MT0274	120.753	61.8133	11.2268	16.0277	-2.68182	5.71552	71.6386	2.58449819159813e-17	1.27151e-15	Rv0261c	narK3	nitrite extrusion protein1
MT0275	76.6892	114.472	60.4609	84.2824	-0.392844948793108	6.39428	4.53486	0.0332111196090866	0.0915891	Rv0262c	aac	aminoglycoside 2'-N-acetyltransferase
MT0276	106.78	208.556	50.9299	77.335	-1.25167	6.79535	45.5566	1.4829e-11	4.51096e-10	Rv0263c	Rv0263c	conserved hypothetical protein
MT0277	70.0601	130.608	31.9846	49.9113	-1.26156	6.14587	43.1889	4.97024611878164e-11	1.40471e-09	Rv0264c	Rv0264c	conserved hypothetical protein
MT0278	159.682	155.296	113.788	113.169	-0.472649497465139	7.08324	7.98488	0.004716962163381	0.0199757	Rv0265c	fecB2	iron transport protein FeIII dicitrate transporter
MT0280	50.3679	22.7928	7.01674	7.25206	-2.25041	4.45557	49.6989	1.79246570927004e-12	5.8549e-11	Rv0267	narU	similar to nitrite extrusion protein 2
MT0281	131.606	181.325	119.577	142.969	-0.241118836104433	7.16994	1.98233	0.159145616307481	0.300852	Rv0268c	Rv0268c	hypothetical protein
MT0282	54.2673	54.1386	38.1828	41.5013	-0.444939329068701	5.55893	4.90654	0.0267552066864669	0.0771487	Rv0269c	Rv0269c	conserved hypothetical protein
MT0283	366.938	430.474	308.152	414.099	-0.153734901211547	8.57	0.759391948802715	0.383518877710598	0.554544	Rv0270	fadD2	acyl-CoA synthase
MT0284	381.691	641.203	300.96	617.888	-0.197679	8.92354	1.20668	0.271991276085003	0.437403	Rv0271c	fadE6	acyl-CoA dehydrogenase
MT0285	125.107	163.572	125.951	161.556	-0.00417848597507479	7.17164	0.000613063948422976	0.980246294388059	0.990185	Rv0272c	Rv0272c	putative serine hydrolase
MT0286	63.691	113.502	81.4527	107.989	0.139211452839564	6.52033	0.521050326647384	0.470393986147921	0.632643	Rv0273c	Rv0273c	putative transcriptional regulator
MT0286.1	130.567	302.594	123.612	251.933	-0.172621783307915	7.66055	1.03993	0.307838722801879	0.47733	Rv0274	Rv0274	member of metalloenzyme/ mutant sensitive to diamide
MT0287	505.174	689.1	600.867	1051.98	0.430583320900852	9.47552	5.74981	0.0164904584800913	0.0537322	Rv0275c	inbR	INH sensitivity/ possible transcriptional regulator Tet R family
MT0288	998.129	1596.47	808.095	1242.97	-0.332928253003676	10.1818	4.17122	0.0411161460408608	0.108869	Rv0276	Rv0276	conserved hypothetical protein
MT0289	215.315	145.31	215.882	212.199	0.274892001141357	7.62403	2.21686	0.136510743712137	0.269572	Rv0277c	VapC25	toxin VC25
MT0290	680.064	646.15	597.066	649.943	-0.0896179717023078	9.32961	0.262458983011108	0.608435811287331	0.745782	Rv0277a	VapB25	antitoxin VapB25
MT0291	13.0632	46.1404	24.9679	36.3213	0.277047123038423	4.92044	0.855207231239547	0.355083398844072	0.52466	Rv0278c	PE_PGRS 3	PE_PGRS-family protein
MT0291.4	5.52422	13.4538	7.71842	10.1773	0.0155483618071619	3.22761	0.00261732302775286	0.959198	0.975352
MT0292	168.066	251.414	23.8569	74.9583	-2.2717	7.01948	85.9211	1.87257576043237e-20	1.14803e-18	Rv0280	PPE3	PPE-family protein
MT0293	289.534	345.822	283.593	361.567	0.0172690256908938	8.32305	0.00992300301194859	0.920650563462954	0.952933	Rv0281	Rv0281	possible S-adenosylmethionine dependent transferase protein
MT0294	7.92888	15.0257	5.78881	8.59278	-0.639038938525206	3.24579	5.1623	0.0230823489018492	0.0692644
MT0295	2572.14	2243.77	1357.45	1458.52	-0.771726603106238	10.8979	23.025	1.59905235664757e-06	1.97895e-05	Rv0282	eccA3	ESX3
MT0296	1449.56	976.437	731.671	632.453	-0.806508	9.88818	21.0999	4.35956435723134e-06	4.94953e-05	Rv0283	eccB3	ESX3
MT0297	3173.76	1895.08	1593.68	1095.73	-0.892144694212267	10.9216	32.1433	1.43207447890849e-08	2.81124e-07	Rv0284	eccC3	ESX3
MT0298	17.8075	32.5479	22.4536	13.2853	-0.479942979447263	4.43806	1.82547	0.176663317569907	0.322798	Rv0285	PE5
MT0299	489.901	446.47	326.512	209.822	-0.837052052775874	8.52473	19.1208	1.22702234072533e-05	0.000124737	Rv0286	PPE4	PPE-family protein
MT0300	497.44	286.505	246.229	147.418	-0.986657845880029	8.20209	32.4933	1.19605536600441e-08	2.38314e-07	Rv0287	esxG	ESAT-6 like
MT0301	469.689	272.774	252.837	175.329	-0.765868925658489	8.19353	18.9341	1.35309351982304e-05	0.000134802	Rv0288	esxH	ESAT-6 like
MT0302	821.029	371.527	338.032	224.936	-1.00265	8.77795	26.2688	2.97046915867515e-07	4.33601e-06	Rv0289	espG3	ESX3
MT0303	634.505	328.715	284.003	191.174	-0.971263917665117	8.4906	27.7298	1.39494924354668e-07	2.17995e-06	Rv0290	eccD3	ESX3
MT0304	545.338	341.152	309.848	215.795	-0.738303037614819	8.46406	17.68	2.6135604443572e-05	0.000237786	Rv0291	mycP3	serine protease
MT0305	349.521	183.128	186.353	112.437	-0.806051970596345	7.70009	22.4272	2.18261232045585e-06	2.64368e-05	Rv0292	eccE3	ESX conserved transmembrane protein ESX-3 pathway
MT0306	282.905	474.256	413.052	764.27	0.617435	8.91809	12.2631	0.000462005220494197	0.00292237	Rv0293c	Rv0293c	conserved hypothetical protein
MT0307	31.3256	30.6986	22.3951	28.9473	-0.282364573261123	4.83068	1.43724	0.230585911195508	0.389028	Rv0294	tam	probable transaconitase methytransferase
MT0308	249.5	136.618	152.322	112.194	-0.498835771194961	7.3465	7.65214	0.00567049195915714	0.023224	Rv0295c	Rv0295c	hypothetical protein
MT0310	320.275	224.46	236.581	226.703	-0.211393221994373	7.97788	1.35749	0.243972605522138	0.404422	Rv0296c	atsG	proable sulfatase
MT0311	128.747	395.059	284.061	343.041	0.466844755696841	8.16932	3.01877	0.0823060480714624	0.186676	Rv0297	PE_PGRS5	PE_PGRS-family protein
MT0312	352.77	480.683	385.804	441.279	0.00265853736998242	8.69787	0.000226171581800827	0.988001064781942	0.994238	Rv0298	Rv0298	possible antitoxin
MT0313	134.856	128.157	127.939	124.687	-0.0577552035265072	7.01147	0.116829687447453	0.732498715073676	0.833099	Rv0299	Rv0299	possible toxin
MT0314	144.15	104.347	124.723	140.41	0.109877249280537	7.00567	0.314403681314786	0.57499	0.717837	Rv0301	VapC2	probable toxin
MT0315	104.7	96.5804	85.5458	104.82	-0.0859622394409083	6.61502	0.204953030317938	0.650752259654451	0.779455	Rv0302	Rv0302	mmpL protein expression transcriptional regulator (TetR/AcrR family)
MT0316	37.8896	46.1866	76.5994	89.4624	0.984183234200555	5.969	27.193	1.84128080914087e-07	2.80057e-06	Rv0303	Rv0303	probable dehydrogenase
MT0318	155.458	222.38	226.056	199.584	0.191288825519986	7.65103	0.934302672676097	0.333747368445832	0.504674	Rv0304c/Rv0305c	PPE5/PPE6	PPE-family protein
MT0319	24.3066	22.4692	23.6815	20.8421	-0.0730444435254898	4.51956	0.0922891030460882	0.761286959127007	0.85289	Rv0306	Rv0306	putative oxidoreductase
MT0320	56.932	67.5462	116.712	117.313	0.915167	6.48755	23.6072	1.18142706884167e-06	1.52362e-05	Rv0307c	Rv0307c	hypothetical protein
MT0321	371.098	274.346	204.772	189.894	-0.694343843027173	8.02311	15.5726	7.93961999159748e-05	0.000641773	Rv0308	Rv0308	conserved integral membrane protein
MT0322	1005.15	724.422	1138.35	918.757	0.261170584655107	9.88686	2.43291	0.118812486115158	0.242183	Rv0309	Rv0309	secreted protein
MT0323	36.8498	33.1027	23.8569	23.9501	-0.546727432813732	4.88533	5.85161	0.0155628209624769	0.0511698	Rv0310c	Rv0310c	antigen
MT0324	96.7063	153.123	154.719	273.689	0.758661585141214	7.40662	20.5165	5.91180770235964e-06	6.5806e-05	Rv0311	Rv0311	hypothetical protein/ Central nervous system Tb phenotype
MT0325	25.0215	37.8185	45.7258	72.0941	0.900839	5.50066	19.0073	1.30218826464508e-05	0.000130873
MT0326	426.21	409.993	754.007	658.963	0.753767	9.13544	18.7335	1.50317883792324e-05	0.000148271	Rv0312	Rv0312	conserved hypothetical protein
MT0327	255.219	426.729	490.119	813.755	0.936304179866204	8.95585	28.3634	1.00547328939101e-07	1.63442e-06	Rv0313	Rv0313	hypothetical protein
MT0328	78.3139	74.7122	53.8535	52.1052	-0.529994753610119	6.01936	8.11987	0.00437828129584666	0.0187204
MT0328.1	39.7094	62.1832	72.1555	159.728	1.11557	6.38453	30.6491	3.09164822723508e-08	5.54965e-07
MT0328.2	85.2679	130.931	92.4456	83.612	-0.266573189122512	6.61771	1.5449	0.213890366391071	0.369945
MT0329	842.736	361.31	447.025	277.955	-0.647072489553486	8.91389	11.1375	0.000846018732885013	0.00490247	Rv0315	Rv0315	immunostimulatory antigen/ probable [beta]-1,3-glucanase
MT0330	154.093	65.9742	86.6568	39.6731	-0.782855448414433	6.43763	17.9736	2.23987742058869e-05	0.000208549	Rv0316	Rv0316	possible muconolactone isomearse
MT0332	128.487	147.991	116.653	136.205	-0.129512385606858	7.04936	0.592726849233078	0.441366596039409	0.60923	Rv0317c	glpQ2	glycerophosphoryl diester phosphodiesterase
MT0333	50.1729	34.8596	32.8033	25.7783	-0.524739962777362	5.17017	5.91503	0.0150122184039082	0.0497288	Rv0318c	Rv0318c	integral membrane protein
MT0334	30.2207	34.351	46.6613	53.2631	0.629656323347549	5.36571	8.78802	0.0030321537778319	0.0140993	Rv0319	pcp	probable pyrrolidone-carboxylate peptidase
MT0335	23.7866	28.9417	7.07521	6.15511	-1.9896	4.05661	51.5279	7.05851536919088e-13	2.36371e-11	Rv0320	Rv0320	conserved hypothetical protein
MT0336	130.567	89.8766	90.7499	84.0386	-0.311129905172824	6.62801	2.65223	0.103404774589739	0.220239	Rv0321	dcd	probable deoxycytidine triphosphate deaminase
MT0337	53.0975	37.6798	49.0587	41.9279	0.019559079503655	5.50906	0.00885016831313123	0.925049314735015	0.954764	Rv0322	udgA	UDP-glucose dehydrogenase/GDP-mannose
MT0338	28.076	25.8904	28.5348	43.2686	0.385705119276587	4.97931	2.44494	0.117904	0.241196	Rv0323c	Rv0323c	conserved hypothetical protein
MT0339	12.7382	42.0256	21.9858	51.1301	0.521739	5.00511	5.03181	0.024885835506221	0.0735138	Rv0324	Rv0324	bedaquiline tolerance/ putative transcriptional regulator
MT0340	16.4427	18.4007	15.4953	17.3684	-0.0844022071518138	4.09134	0.112345856038461	0.737489056352619	0.834927	Rv0325	Rv0325	hypothetical protein
MT0341	13.4531	14.8407	10.759	16.3933	-0.0836810805430864	3.80507	0.0958839130566957	0.756826158392648	0.848608	Rv0326	Rv0326	hypothetical protein
MT0342	16.3777	13.6849	21.9858	23.1579	0.592519130108769	4.24035	5.60084	0.0179518864998179	0.0575529	Rv0327c	cyp135A1	cytochrome P-450 monooxygenasemonoxygenase
MT0343	49.9129	67.315	48.357	84.7699	0.146315675173983	5.9706	0.560468	0.454071801239725	0.617376	Rv0328	Rv0328	transcriptional regulator (TetR/AcrR family)
MT0344	8.96873	11.512	12.2793	13.2853	0.326711569721081	3.53971	1.49949	0.220750171915591	0.377387	Rv0329c	Rv0329c	conserved hypothetical protein
MT0345	14.363	17.7996	15.3784	21.6953	0.194194402572123	4.1232	0.592032318304845	0.441634308170245	0.60937	Rv0330c	Rv0330c	hypothetical protein
MT0346	29.6358	38.6506	41.6327	48.5706	0.408830718268457	5.31251	3.74243	0.0530473788928269	0.132121	Rv0331	Rv0331	putative dehydrogenase
MT0348	77.1441	68.4708	87.4754	72.6425	0.133314	6.25815	0.533848498814748	0.464993349434969	0.626973	Rv0334	rmlA	glucose-1-phosphate thymidyltransferase
MT0349	5.78418	15.488	10.1158	15.2964	0.369275319843311	3.56243	1.57739	0.209136	0.364093	Rv0335c	PE6	PE-family protein
MT0350	107.625	200.835	126.184	231.213	0.216213493562121	7.38022	1.68932	0.193690655239798	0.344733	Rv0336	Rv0336	conserved hypothetical protein
MT0351	429.914	343.464	499.943	417.207	0.249148150730703	8.7236	2.08694	0.148562895749001	0.286555	Rv0337c	aspC	aspartate aminotransferase
MT0352	1101.85	881.336	1001.35	924.73	-0.0343275207808402	9.93284	0.041570757227305	0.838440178192756	0.902535	Rv0338c	Rv0338c	iron-sulfur binding reductase
MT0353	107.95	148.361	107.122	151.196	0.00825567384716244	7.0088	0.00238388869217943	0.961058692974308	0.976995	Rv0339c	Rv0339c	possible transcription factor
MT0355	79.5488	106.705	98.2929	119.446	0.233430132201228	6.65992	1.68559	0.194183873109156	0.345457	Rv0340	Rv0340	hypothetical protein
MT0356	22.2918	27.9246	241.317	162.105	2.98127	6.82652	157.355	4.28165997120487e-36	6.56247e-34	Rv0341	iniB	Isoniazid inductible gene protein Inib
MT0357	101.776	126.401	175.652	175.573	0.629979983590687	7.17954	12.7632	0.000353499974182361	0.00232843	Rv0342	iniA	Isoniazid inductible gene protein IniA
MT0357.1	117.568	187.012	168.168	223.23	0.384969189441753	7.44393	5.21202	0.0224312000043715	0.0677698	Rv0343	iniC	Isoniazid inductible gene protein IniA
MT0359	44.0638	39.2517	41.2818	36.0166	-0.109074176206931	5.33141	0.270345571835674	0.603100053979429	0.742693	Rv0344c	lpqJ	lipoprotein
MT0360	32.4954	49.3767	40.2293	47.5955	0.125020304042597	5.4112	0.330205013781569	0.565538393465908	0.709817	Rv0345	Rv0345	conserved hypothetical protein
MT0361	374.347	201.113	171.033	132.122	-0.868794707542193	7.77968	21.7635	3.08406749773944e-06	3.61471e-05	Rv0346c	ansP2	L-asparagine permease
MT0362	68.5003	67.4537	59.8177	68.5594	-0.0854567290400561	6.04867	0.207526221835117	0.648713	0.778183	Rv0347	Rv0347	conserved hypothetical protein
MT0363	60.3115	93.8064	72.6233	100.066	0.179541	6.35456	0.943374887498869	0.331411415646706	0.502928	Rv0348	mosR	involved in persistance/ possible transcription factor
MT0364	81.3685	67.0838	69.992	87.817	0.0865629362838032	6.26054	0.179338693826622	0.671942173577594	0.791982	Rv0349	Rv0349	hypothetical protein
MT0365	1291.43	2876.88	1520.7	3435.89	0.245984903510327	11.1557	2.71453	0.0994380232631317	0.214195	Rv0350	dnaK	70 kD heat shock protein, chromosome replication
MT0366	83.5782	212.763	90.6914	171.612	-0.0990418742412859	7.12739	0.300615527283966	0.583496797563405	0.725323	Rv0351	grpE	stimulates DnaK ATPase activity
MT0367	430.174	767.141	536.898	757.384	0.150305426993621	9.28317	0.689216883239339	0.406430875524961	0.574947	Rv0352	dnaJ1	acts with GrpE to stimulate DnaK ATPase
MT0368	91.767	123.904	95.3692	106.831	-0.0799798235259082	6.70868	0.195672929924548	0.658236439203962	0.785116	Rv0353	hspR	heat shock regulator
MT0369	16.6376	14.3322	24.5001	17.3074	0.415618860803178	4.19366	2.73548	0.0981417588386698	0.211976	Rv0354c	PPE7	PPE-family protein
MT0370	256.389	344.203	318.443	331.767	0.129454738999214	8.28921	0.508695114189322	0.475704277391294	0.637204	Rv0355c	PPE8	PPE-family protein
MT0372	61.5463	78.2259	67.5946	58.1993	-0.146682878378385	6.05571	0.518238803449265	0.471593926696983	0.633615	Rv0356c	Rv0356c	hypothetical protein
MT0373	180.414	189.462	157.818	184.044	-0.117230620064203	7.47615	0.487321738380487	0.485124454241018	0.646346	Rv0357c	purA	adenylosuccinate synthase
MT0374	21.9669	17.1061	15.0275	13.8338	-0.427104728220734	4.09514	2.80502	0.0939694914446319	0.204851	Rv0358	Rv0358	hypothetical protein
MT0375	48.8731	35.8304	27.2483	19.867	-0.846605364673519	5.04714	15.175	9.79942806632611e-05	0.000768715	Rv0359	Rv0359	zinc mettaloprotease
MT0376	8.25383	9.80136	10.8175	10.1163	0.214806261254198	3.30231	0.604716292540384	0.436784183765517	0.604902	Rv0360c	Rv0360c	secreted conserved hypothetical protein
MT0377	316.83	366.025	313.064	346.515	-0.0481877164769552	8.39115	0.0772118409572897	0.781112010122053	0.866573	Rv0361	Rv0361	probable conserved membrane protein
MT0378	66.2256	41.9794	62.449	50.9473	0.0964035709468799	5.79426	0.227464	0.633410941595463	0.766052	Rv0362	mgtE	putative magnesium ion transporter
MT0379	453.961	470.003	478.483	611.063	0.227434277840323	8.97581	1.58786	0.207631622355205	0.362423	Rv0363c	fba	fructose bisphosphate aldolase
MT0380	236.502	161.954	166.063	136.449	-0.378903919086946	7.45403	4.9107	0.0266908172011539	0.0770873	Rv0364	Rv0364	conserved transmembrane protein
MT0381	56.282	87.0564	76.3071	122.127	0.464052149776569	6.41892	6.40799	0.0113607873144954	0.0400999	Rv0365c	Rv0365c	conserved hypothetical protein
MT0382	10.9834	32.363	37.6565	62.5871	1.34696	5.17065	28.2328	1.07565550204715e-07	1.73523e-06	Rv0366c	Rv0366c	conserved hypothetical protein
MT0384	10.5285	10.9109	10.9344	12.2493	0.111626808257307	3.49423	0.175330679835493	0.675417075377158	0.79444	Rv0368c	Rv0368c	conserved hypothetical protein
MT0384.1	15.5328	14.1472	12.5717	15.1745	-0.0996834652253128	3.8546	0.138422509149933	0.709854315095342	0.816855	Rv0369c	Rv0369c	possible membrane oxidoreductase
MT0385	14.6879	14.9794	13.4488	13.0415	-0.163716748985047	3.82335	0.398914	0.527650470430506	0.680481	Rv0370c	Rv0370c	possible oxidoreductase
MT0388	22.0319	22.0068	29.178	27.2409	0.356167038716056	4.65669	2.32966	0.126929303482784	0.254561	Rv0373c	Rv0373c	putative CO dehydrogenase gene cluster
MT0390	5.39424	6.88869	10.759	11.2133	0.843691516835937	3.11663	8.93378	0.00279944654126212	0.0132334	Rv0375c	Rv0375c	putative CO dehydrogenase gene cluster
MT0391	37.1747	47.4349	41.925	52.8974	0.165240976580259	5.49115	0.644278484810397	0.422165729041688	0.590084	Rv0377	Rv0377	transcriptional regulator (LysR family)
MT0392	12.2833	8.27568	5.32103	5.72852	-0.868368242753001	3.00103	8.52935	0.00349464000600137	0.0157656
MT0393	15.7928	20.3424	18.7698	14.7479	-0.109427	4.13265	0.159309787073163	0.689792775430672	0.805162	Rv0380c	Rv0380c	possible RNA methyltransferase
MT0394	25.4114	29.8664	28.1839	27.3019	0.00876774121915395	4.79762	0.00144050336834312	0.969724387121985	0.982795	Rv0381c	Rv0381c	hypothetical protein
MT0395	95.8614	150.58	138.931	153.939	0.282031682013188	7.07635	2.34636	0.125576154279247	0.252483	Rv0382c	pyrE	Probable orotate phosphoribosyltransferase
MT0396	403.918	542.311	528.595	684.436	0.361899561347836	9.07664	4.26925	0.0388079965026379	0.104041	Rv0383c	Rv0383c	possible conserved secreted protein
MT0397	340.292	996.549	1386.16	2571.19	1.69603	10.3703	75.4161	3.81269532954154e-18	1.97319e-16	Rv0384c	clpB	heat shock protein
MT0398	84.813	116.091	121.916	148.942	0.440878566175841	6.88336	6.26384	0.0123227157566901	0.0427616	Rv0385	Rv0385	predicted flavohaemoglobin
MT0399	174.89	247.9	197.931	246.265	0.0840962717816584	7.76071	0.247489702990482	0.618848227573003	0.754624	Rv0386	Rv0386	Class III adenylyl cyclase possibly/ transcriptional regulator (LuxR/UhpA family)
MT0400	41.3991	41.1472	60.344	57.8946	0.517923455874201	5.65256	6.87702	0.0087310882361153	0.0325781	Rv0387c	Rv0387c	conserved hypothetical protein
MT0401	74.2845	103.192	115.893	134.62	0.511594122508502	6.74302	7.97288	0.00474833714187711	0.0200659	Rv0389	purT	phosphoribosylglycinamide formyltransferase II
MT0401.1	97.2263	71.6146	72.6233	66.7312	-0.261578786077181	6.26962	1.90385	0.167647918009669	0.311168
MT0402	106.195	91.4948	89.3465	68.1328	-0.337080339391487	6.47418	3.29249	0.0695976075710622	0.1645	Rv0391	metZ	o-succinylhomoserine sulfhydrylase
MT0403	125.757	140.918	127.003	155.523	0.0785531764105886	7.10241	0.219500406203991	0.639420847682434	0.770981	Rv0392c	ndhA	possible NADH dehydrogenase
MT0404	7.01901	7.81335	8.24467	8.16619	0.146156728124144	2.9867	0.274567005548318	0.600284509316871	0.740828	Rv0393	Rv0393	conserved hypothetical protein
MT0404.1	99.111	76.654	83.0899	95.13	0.0289918258268101	6.46918	0.0203369375406623	0.8866	0.934916	Rv0394c	Rv0394c	possible hyaluronidase/ chondrosulfatase
MT0407	6.49908	10.0788	9.53107	7.25206	0.0302699882686998	3.08279	0.0092078538715441	0.923554276897213	0.954451	Rv0395	Rv0395	hypothetical protein
MT0407.1	91.962	182.296	164.952	259.307	0.673941873337298	7.44919	15.1933	9.70454052639824e-05	0.000762773	Rv0396	Rv0396	hypothetical protein
MT0408	12.8032	13.0377	17.7757	17.3684	0.443076577849109	3.9406	2.96275	0.0852029791974733	0.191502	Rv0398c	Rv0398c	possible secreted protein
MT0409	55.2422	52.7054	73.6758	70.9971	0.422591989880847	5.98325	5.22491	0.0222655716082362	0.0673204	Rv0399c	lpqK	possible PBP
MT0410	81.6285	124.782	130.862	166.554	0.547551944351483	6.97816	9.8442	0.00170368506843104	0.00876024	Rv0400c	fadE7	acyl-CoA dehydrogenase
MT0411	14.6229	16.4589	15.7877	12.7368	-0.130558776053527	3.90912	0.235882243066563	0.627196124133783	0.761541	Rv0401	Rv0401	probable conserved membrane protein
MT0412	78.6389	52.2431	56.8941	42.4764	-0.383272683596565	5.84956	3.9276	0.0474997030363039	0.121571	Rv0402c	mmpL1	conserved large membrane protein
MT0413	15.8578	13.6849	12.2208	12.1274	-0.274580568075112	3.76373	1.09814	0.294674635671374	0.462496
MT0414	10.2685	9.47773	7.543	7.0083	-0.439863683771159	3.11935	2.52275	0.112214878822617	0.233757
MT0415	33.1453	13.9623	9.99886	6.70359	-1.40356	4.00298	24.4699	7.54816611095057e-07	1.01964e-05	Rv0403c	mmpS1	conserved small membrane protein
MT0417	131.476	64.6797	55.023	37.9057	-1.01616	6.17708	25.5924	4.21704669425158e-07	5.9804e-06	Rv0404	fadD30	fatty acid AMP ligase / lipid degradation
MT0418	169.691	96.2567	88.2355	62.0996	-0.788851271145397	6.70272	18.5192	1.68201969404761e-05	0.000161514	Rv0405	pks6	polyketide synthase
MT0419	69.9951	56.1729	75.9562	80.6868	0.320484206937341	6.14573	2.71518	0.0993979191790541	0.214195	Rv0406c	Rv0406c	beta lactamase like protein
MT0420	209.725	179.06	274.647	266.072	0.480269700304514	7.86094	8.17395	0.00424962076194288	0.0183276	Rv0407	fgd1	probable coenzyme F420-dependent enzyme
MT0421	205.306	148.777	256.053	204.216	0.387705378796524	7.67019	5.34756	0.0207512896633403	0.0640658	Rv0408	pta	phosphate acetyltransferase
MT0422	77.729	67.7311	93.615	69.9002	0.157025185167967	6.27334	0.710305918280845	0.399342	0.568518	Rv0409	ackA	acetate kinase
MT0423	328.074	399.082	806.399	1001.03	1.31211	9.30776	56.3299	6.12776589348121e-14	2.28216e-12	Rv0410c	pknG	serine-threonine protein kinase
MT0424	196.012	284.054	618.526	842.032	1.61262	8.9226	80.9589	2.3046157932692e-19	1.31198e-17	Rv0411c	glnH	putative glutamine binding protein
MT0425	372.852	570.559	1048.94	1765.73	1.56117	9.87593	83.5144	6.32520458960305e-20	3.81908e-18	Rv0412c	Rv0412c	unknown probable membrane protein
MT0426	39.7094	91.9109	86.6568	113.534	0.709732897177985	6.37652	10.0732	0.00150437902546833	0.00789849	Rv0413	mutT3	MutT homologue
MT0427	31.0006	41.0085	42.2174	46.5595	0.312721	5.3333	2.1467	0.142876453116869	0.27869	Rv0414c	thiE	thiamine synthesis, thiazole moiety
MT0428	56.412	83.404	117.004	128.099	0.833813679965873	6.59013	18.6092	1.6044372175422e-05	0.000156325	Rv0415	thiO	thiamine biosynthesis oxidoreductase
MT0429	7.47394	6.28766	10.4666	8.22713	0.436634579286126	3.03863	2.47262	0.115845009657559	0.238125	Rv0416	thiS	thiamine synthesis
MT0430	32.1055	34.9982	56.3094	51.7395	0.686348666987612	5.45601	10.4449	0.00122991614172664	0.00668652	Rv0417	thiG	thiamine synthesis, thiazole moiety
MT0431	4.61435	4.71575	8.42009	5.97229	0.602193147243091	2.59435	3.99319	0.0456844338292753	0.117757
MT0432	438.233	311.748	266.812	230.116	-0.577038	8.28462	10.539	0.00116879482380916	0.00640667	Rv0418	lpqL	probable aminopeptidase Y
MT0433	418.476	611.753	638.64	887.433	0.573202153121736	9.32011	10.9892	0.000916419966374209	0.00521705	Rv0419	lpqM	possible zinc metallopeptidase
MT0434	93.4568	59.3167	80.3417	62.4043	-0.0731752334777979	6.20896	0.149675081025144	0.698846056036328	0.811718	Rv0420c	Rv0420c	possible transmembrane protein
MT0435	70.645	45.678	70.1674	44.0609	-0.0306977945491974	5.85136	0.0257121354786758	0.872605342211558	0.926589	Rv0421c	Rv0421c	hypothetical protein
MT0436	187.109	98.9382	191.791	128.526	0.205724459535577	7.24486	1.34996	0.245285595692449	0.406092	Rv0422c	thiD	phosphomethylpyrimidine kinase
MT0437	1043.1	849.621	1208.28	1057.16	0.263684222180617	10.0219	2.54253	0.110816786157613	0.231449	Rv0423c	thiC	thiamine biosynthesis
MT0438	209.205	117.755	192.376	135.352	0.0393382878886233	7.35545	0.0499286493172235	0.823187475761691	0.892384	Rv0424c	Rv0424c	hypothetical protein
MT0440	734.526	732.051	916.036	874.818	0.287801129798653	9.66971	2.95853	0.0854255388060398	0.191878	Rv0425c	ctpH	C-terminal region putative cation-transporting
MT0441	95.4065	126.539	150.86	156.316	0.482001132206885	7.04874	7.38579	0.00657410899473841	0.0260416	Rv0426c	Rv0426c	possible transmembrane protein
MT0442	148.764	103.423	97.942	83.8558	-0.453108396963825	6.76285	6.32951	0.0118745068219237	0.0415451	Rv0427c	xthA	possible transmembrane protein
MT0443	120.493	65.5581	60.8702	43.5124	-0.789812586971461	6.18388	16.2919	5.42953490354467e-05	0.0004536	Rv0428c	Rv0428c	GCN5-related N-acetyltransferase
MT0444	119.583	68.7482	49.9358	39.4293	-1.03242	6.11934	27.1362	1.89616733774308e-07	2.87309e-06	Rv0429c	def	polypeptide deformylase
MT0445	176.775	211.978	155.713	142.116	-0.380235513045258	7.42437	4.74246	0.0294269799273321	0.0832859	Rv0430	Rv0430	hypothetical protein
MT0446	219.149	175.13	152.965	140.836	-0.416575114396002	7.42734	6.13282	0.0132694810904611	0.0454716	Rv0431	Rv0431	tuberculin related peptide (AT103)
MT0447	392.999	258.164	259.386	221.462	-0.410510626550926	8.14517	5.24759	0.0219771665625042	0.0667767	Rv0432	sodC	superoxide dismutase precursor (Cu-Zn)
MT0448	418.996	235.279	264.239	194.282	-0.471064	8.12045	6.81361	0.00904655671933055	0.0335646	Rv0433	Rv0433	conserved hypothetical protein
MT0449	119.713	70.2277	100.106	65.878	-0.175711455125475	6.47693	0.897274319726449	0.343513619062763	0.513415	Rv0434	Rv0434	conserved hypothetical protein
MT0450	5.6542	5.50171	6.13965	5.5457	0.0645501334044237	2.54161	0.0490033278273069	0.824806721917232	0.893167
MT0451	213.04	202.084	221.963	228.531	0.118393598817363	7.75831	0.499674	0.479643301660779	0.64103	Rv0435c	Rv0435c	ATPase of AAA-family
MT0452	153.573	138.375	177.582	181.545	0.300776	7.34761	3.14273	0.0762660586328856	0.176186	Rv0436c	pssA	CDP-diacylglycerol-serine o-phosphatidyltransferase
MT0453	67.4605	115.305	100.047	125.967	0.345922390169178	6.677	3.33132	0.0679722179839339	0.161136	Rv0437c	psd	putative phosphatidylserine decarboxylase
MT0454	120.103	119.234	100.339	133.219	-0.0488008817227917	6.88674	0.0694642302085811	0.792118	0.873676	Rv0438c	moeA2	molybdenum cofactor biosynthesis, protein A
MT0455	118.478	100.926	73.5588	70.5096	-0.602455725285056	6.5075	10.7092	0.00106603298359717	0.00594599	Rv0439c	Rv0439c	Probable oxidoreductase
MT0456	3122.29	5835.97	1469.54	4351.54	-0.755097598341444	11.8514	19.872	8.28047733312533e-06	8.82292e-05	Rv0440	groEL2	60 kD chaperonin 2
MT0457	66.0957	100.094	119.635	213.601	0.976159451283823	6.96537	29.9492	4.43515709189375e-08	7.65113e-07	Rv0441c	Rv0441c	65 kDa antigen
MT0458	94.3017	97.8287	88.8203	89.889	-0.104302689968541	6.53646	0.340937	0.559288880399423	0.705083	Rv0442c	PPE10	PPE-family protein
MT0459	138.495	187.197	143.2	183.8	0.0106850830915384	7.35137	0.00398445766376199	0.949668909314894	0.968628	Rv0443	Rv0443	conserved protein
MT0460	245.34	264.498	237.926	219.39	-0.157128292823812	7.91832	0.858296557137791	0.354216	0.523961	Rv0444c	rskA	anti sigma factor RskA (regulator of sigma K)
MT0461	266.852	238.561	213.718	233.529	-0.175379778569048	7.89648	1.04606	0.306415251711355	0.475493	Rv0445c	sigK	ECF-type sigma factor
MT0462	65.7057	44.476	56.0755	52.0442	-0.00146834462914107	5.77272	4.9737811139039e-05	0.994372962676128	0.995122	Rv0446c	Rv0446c	immunoantigen 'conserved hypothetical protein
MT0463	75.1294	57.791	53.5611	60.3932	-0.211787301920447	5.95004	1.06574	0.301909591747039	0.469781	Rv0447c	ufaA1	unknown fatty acid methyltransferase
MT0464	6.88903	8.46061	10.8175	16.1496	0.796773798202784	3.41761	8.40699	0.00373780639860813	0.0166241	Rv0448c	Rv0448c	conserved hypothetical protein
MT0465	98.916	81.0461	73.3834	83.5511	-0.192905297816491	6.39797	0.957476033990808	0.327823609474334	0.498808	Rv0449c	Rv0449c	conserved hypothetical protein
MT0466	951.271	685.54	413.754	365.041	-1.05518	9.23843	34.2089	4.95016004243735e-09	1.0479e-07	Rv0450c	mmpL4	conserved large membrane protein
MT0467	224.933	243.323	107.649	121.457	-1.03267	7.44685	38.8467	4.58418640783632e-10	1.14175e-08	Rv0451c	mmpS4	mebrane protein
MT0468	110.809	139.207	103.731	121.03	-0.148829947029141	6.89264	0.729929931009188	0.392905901519624	0.563117	Rv0452	Rv0452	putative transcriptional regulator
MT0469	35.68	33.8887	30.4644	24.1939	-0.356805535221633	4.96225	2.54267	0.110807179002576	0.231449	Rv0453	PPE11	PPE-family protein
MT0470	245.6	209.758	374.109	334.265	0.639700946790595	8.18504	13.9974	0.000183063798937082	0.00133122
MT0471	638.86	647.121	845.576	1050.45	0.551766	9.63591	10.0227	0.00154620529995598	0.00805884	Rv0455c	Rv0455c	hypothetical protein
MT0472	39.3844	27.9246	25.3772	22.4875	-0.473789844974111	4.85281	4.17454	0.0410356300722611	0.1088	Rv0456c	echA2	enoyl-CoA hydratase/isomerase superfamily
MT0472.1	3.18455	2.26541	2.45586	2.74238	-0.0474592864246049	1.46703	0.0202231813963305	0.886915529270224	0.934916
MT0473	179.115	171.293	158.344	155.95	-0.156563643061913	7.37755	0.887873434854157	0.346054238171341	0.51591	Rv0457c	Rv0457c	Prolyl oligopeptidase/ probable peptidase
MT0474	44.7787	50.8561	43.0945	48.2658	-0.0654371668681637	5.55054	0.107568978176684	0.742928977288528	0.839164	Rv0458	Rv0458	probable aldehyde dehydrogenase
MT0475	6.95402	7.30479	7.19216	7.25206	0.0185142516064081	2.86609	0.00433342770237466	0.947514146269725	0.967355	Rv0459	Rv0459	conserved hypothetical protein
MT0476	119.063	121.916	90.2821	109.756	-0.274851	6.78623	2.40086	0.121268716697632	0.245932	Rv0460	Rv0460	conserved hydrophobic protein
MT0477	222.918	198.478	160.04	176.548	-0.323266712003519	7.56687	3.569	0.0588676287825275	0.143479	Rv0461	Rv0461	unknown possible membrane protein
MT0478	831.687	807.78	648.347	771.217	-0.212966039485244	9.57907	1.49261	0.221812468823839	0.378392	Rv0462	lpdC	probable dihydrolipoamide dehydrogenase
MT0479	33.3403	40.5924	38.0658	34.6149	-0.0206064600286282	5.20072	0.0086794964120287	0.925773420828364	0.954764	Rv0463	Rv0463	probable conserved membrane protein
MT0480	407.817	310.546	385.336	405.689	0.151912856976646	8.56013	0.653319182989492	0.418928478782176	0.587001	Rv0464c	Rv0464c	conserved hypothetical protein
MT0481	470.209	732.42	914.866	1515.56	1.00476	9.82714	35.6054	2.41618721531092e-09	5.59797e-08	Rv0465c	RamB	inolved in glyoxylate cycle/transcriptional regulator (PbsX/Xre family)
MT0482	201.602	150.026	112.911	103.052	-0.689187	7.14979	15.574	7.93398834891343e-05	0.000641773	Rv0466	Rv0466	conserved hypothetical protein
MT0483	3656.25	3598.35	2598.71	2569.12	-0.489314033223862	11.6007	12.4863	0.000409949376297703	0.00264113	Rv0467	iclI	isocitrate lyase
MT0484	757.013	585.677	435.915	354.986	-0.759316740587268	9.05936	18.345	1.84300491018844e-05	0.000174451	Rv0468	fadB2	3-hydroxybutyryl-CoA dehydrogenase
MT0486	945.876	829.879	832.244	868.846	-0.0591980232634071	9.76374	0.120026485104859	0.729005766086711	0.831623	Rv0470c	pcaA	mycolic acid synthase
MT0487	11.2434	9.52396	14.1504	9.87256	0.192819242413918	3.49874	0.512572751158929	0.474027247725976	0.635598	Rv0470A	Rv0470A	hypothetical protein
MT0488	77.0141	81.6934	84.2009	91.2298	0.144058982657403	6.38626	0.620097190713741	0.431011171583218	0.598877	Rv0471c	Rv0471c	hypothetical protein
MT0489	178.53	227.003	201.38	294.958	0.276229982897565	7.81752	2.70434	0.100075277724606	0.2146	Rv0472c	Rv0472c	transcriptional regulator (TetR/AcrR family)
MT0490	121.078	205.967	177.29	286.914	0.513876428929808	7.62888	9.48905	0.00206701675790584	0.0103221	Rv0473	Rv0473	possible membrane protein
MT0491	167.221	534.96	274.764	718.686	0.570138562073329	8.72808	10.1773	0.00142180909099947	0.00757474	Rv0474	Rv0474	transcriptional regulator (PbsX/Xre family)
MT0493	2047.28	3093.25	2219.86	3834.21	0.21335	11.4506	2.16392	0.141283574617103	0.276938	Rv0475	hbhA	iron regulated heparin binding heagglutinin HbhA (adhesin)
MT0495	386.825	351.554	369.081	543.113	0.280243236901259	8.68911	1.89386	0.168767230819561	0.312372	Rv0477	Rv0477	conserved secreted protein
MT0496	63.886	79.3355	97.8835	111.645	0.553724076295631	6.46435	8.9403	0.00278947116328617	0.0132176	Rv0478	deoC	deoxyribose-phosphate aldolase
MT0497	723.023	567.693	879.958	754.946	0.347317924745889	9.51472	4.08045	0.0433820050095247	0.113362	Rv0479c	Rv0479c	unknown hydrophobic protein
MT0498	152.338	147.76	170.214	137.058	0.0257709331767856	7.24751	0.0219660930080749	0.882177335883782	0.931919	Rv0480c	Rv0480c	possible amidohydrolase
MT0499	51.5377	53.4451	38.1243	33.0914	-0.563304295438434	5.46511	7.14856	0.00750241564024273	0.0287353	Rv0481c	Rv0481c	hypothetical protein
MT0500	55.3072	36.7551	27.7161	19.9889	-0.938207808668088	5.13114	18.574	1.63436181734686e-05	0.000158081	Rv0482	murB	UDP-N-acetylenolpyruvoylglucosamine reductase
MT0501	2888.91	2612.29	2846.58	2656.02	0.00132849911722767	11.4258	8.6996159325281e-05	0.992558100435424	0.995055	Rv0483	lprQ	conserved lipoprotein
MT0502	93.7817	149.702	146.065	160.703	0.369106400236422	7.10528	3.9233	0.0476213356380754	0.121726	Rv0484c	Rv0484c	probable short chain type oxidoreductase
MT0503	800.297	870.148	1350.14	1255.09	0.641427852169895	10.0621	14.4504	0.000143898733421245	0.00108605	Rv0485	Rv0485	PE/PPE protein expression transcriptional regulator (ROK family)
MT0504	322.354	571.484	594.552	688.093	0.574976739043736	9.08812	8.24407	0.00408854375264753	0.0179042	Rv0486	mshA	Glycosyltransferase
MT0505	45.4936	61.8595	53.3857	68.4985	0.188385633697501	5.84378	0.962345764369591	0.326596570951575	0.497701	Rv0487	Rv0487	conserved hypothetical protein
MT0506	3.18455	4.99315	7.48452	5.48475	0.664414	2.43487	3.94921	0.0468933375356816	0.12035
MT0507	17.6125	13.6849	16.8402	18.8919	0.201247719341638	4.0753	0.574255463896977	0.448572846241784	0.613229	Rv0488	Rv0488	probable membrane protein
MT0508	179.96	170.414	174.074	206.775	0.115891643147959	7.51502	0.451321134469111	0.501708235491012	0.659819	Rv0489	gpm1	phosphoglycerate mutase I
MT0509	517.262	817.211	770.087	1189.95	0.558088995639831	9.68606	11.1332	0.000847983368768276	0.00490452	Rv0490	senX3	sensor kinase
MT0510	82.0184	171.524	167.934	259.246	0.812552689611958	7.41198	20.6524	5.50679897799955e-06	6.18158e-05	Rv0491	regX3	two-component response regulator
MT0511	23.3317	32.8715	30.6398	27.1191	0.0548434444793994	4.83891	0.0482270009333519	0.826177653384636	0.893915	Rv0492c	Rv0492c	gmc-type oxidoreductase
MT0512	11.4384	13.1764	13.2733	12.8587	0.0879455802146301	3.67864	0.111529	0.738410530664543	0.835482
MT0513	25.1514	27.8322	20.9333	25.9002	-0.183220184413623	4.64811	0.610348719213771	0.434656541409134	0.602585	Rv0493c	Rv0493c	conserved hypothetical protein
MT0514	6.95402	9.20033	6.31507	9.62879	-0.0317513898441328	3.02635	0.0128561486282157	0.909725364833975	0.947692	Rv0494	Rv0494	lipid responsive stravation induced/ transcriptional regulator (GntR family)
MT0515	254.764	328.854	318.56	477.235	0.430127016227048	8.43032	5.96267	0.0146119058654165	0.0488224	Rv0495c	Rv0495c	conserved hypothetical protein
MT0516	260.288	271.757	245.527	257.662	-0.0805236896910895	8.01639	0.226198043035126	0.634357365488009	0.766738	Rv0496	Rv0496	probable exopolyphosphate
MT0517	224.218	223.813	212.373	202.205	-0.112422644321827	7.75333	0.455753883575113	0.499615116249493	0.659042	Rv0497	Rv0497	possible transmembrane protein
MT0518	87.0227	59.3167	72.4479	54.4819	-0.193908261789625	6.09627	1.10103	0.294039137874554	0.462167	Rv0498	Rv0498	conserved hypothetical protein
MT0519	54.3973	36.8938	45.7842	31.8116	-0.231358321133708	5.40332	1.20913	0.271503702977306	0.437364	Rv0499	Rv0499	hypothetical protein
MT0520	87.6076	87.1489	82.0374	70.3877	-0.201542982412126	6.35601	1.17546	0.278281966200186	0.44447	Rv0500	proC	pyrroline-5-carboxylate reductase
MT0521	201.991	348.965	236.113	289.473	-0.0230829489735959	8.07293	0.0153868551125242	0.901280624839548	0.942678	Rv0500A	Rv0500A	conserved protein
MT0522	908.247	526.592	609.755	577.91	-0.220470921574584	9.35693	1.16278	0.280890742622588	0.44774	Rv0501	galE1	UDP-glucose 4-epimerase
MT0523	635.805	622.987	711.556	712.713	0.178261027911307	9.3899	1.07323	0.300216562839573	0.467985	Rv0502	Rv0502	conserved hypothetical protein
MT0524	903.957	462.051	449.656	346.393	-0.711823860631815	9.07842	12.8524	0.000337040901910518	0.00223108	Rv0503c	cmaA2	cyclopropane fatty acyl phospholipid synthase2
MT0525	14.233	16.6438	13.2733	12.4931	-0.258707163150276	3.83647	0.960668424985533	0.327018526042806	0.497963
MT0526	235.592	271.849	260.613	391.246	0.335973559856477	8.17959	3.50912	0.0610318341515088	0.147628	Rv0505c	serB1	probable phosphoserine phosphatase
MT0527	79.6137	119.928	69.992	85.1965	-0.340764052498856	6.47283	3.21731	0.0728630552921447	0.16972	Rv0506	mmpS2	conserved small membrane protein
MT0528	193.738	208.279	141.037	155.34	-0.440495237485684	7.44891	7.16942	0.00741566892663934	0.0284655	Rv0507	mmpL2	conserved large membrane protein
MT0529	12.7382	16.7825	14.2089	15.6011	0.0235958268190614	3.90277	0.00812505129206187	0.928176705060365	0.956252	Rv0508	Rv0508	conserved hypothetical protein
MT0530	594.926	838.247	629.168	697.417	-0.0924762974431488	9.4306	0.266422349124241	0.605741850731263	0.743419	Rv0509	hemA	glutamyl-tRNA reductase
MT0531	217.069	328.068	232.43	224.631	-0.224517485365555	7.96975	1.32816	0.249132	0.410075	Rv0510	hemC	porphobilinogen deaminase
MT0532	610.524	766.91	491.932	557.19	-0.386304584013661	9.245	4.90224	0.0268219070799247	0.0772293	Rv0511	hemD	uroporphyrin-III c-methyltransferase
MT0533	206.931	202.962	140.92	147.235	-0.508584377697225	7.44817	9.5114	0.00204199609734774	0.0102228	Rv0512	hemB	[delta]-aminolevulinic acid dehydratase
MT0534	86.1128	91.0787	57.5373	56.8586	-0.630813921519366	6.19026	11.6767	0.000632877229620039	0.00383868	Rv0513	Rv0513	possible conserved membrane protein
MT0535	26.0613	28.0633	23.3891	21.2687	-0.278472958300104	4.63325	1.35917	0.243681450751062	0.404108	Rv0514	Rv0514	possible transmembrane protein
MT0536	117.438	207.4	131.564	229.567	0.155086511863088	7.42311	0.896445211719794	0.343737	0.513415	Rv0515	Rv0515	conserved 13E12 repeat family protein
MT0537	738.881	1183.51	95.3692	314.216	-2.43111	9.18777	96.7091	8.0298033798707e-23	5.33313e-21	Rv0516c	Rv0516c	Possible anti-anti-sigma factor
MT0538	222.983	188.861	122.442	142.116	-0.637167430733581	7.4027	12.5504	0.000396118362745614	0.0025709	Rv0517	Rv0517	possible membrane acyltransferase
MT0539	88.9074	79.6129	71.7462	68.3766	-0.264375	6.27189	2.07527	0.149703669060867	0.288337	Rv0518	Rv0518	possible exported protein
MT0540	39.4494	36.2465	25.3187	27.0581	-0.530166956285876	5.00603	5.83936	0.0156714948075989	0.0514847
MT0541	113.279	157.839	105.076	111.584	-0.305258095957526	6.93167	2.79303	0.0946750310772098	0.20607	Rv0519c	Rv0519c	possible conserved membrane protein
MT0542	81.1735	79.5667	48.0062	50.7645	-0.702793821619786	6.02235	14.0853	0.000174699599760865	0.00128446	Rv0520	Rv0520	similar to methyltransferases
MT0543	5.91416	3.92979	2.92364	4.02215	-0.482171649821898	2.10372	2.0716	0.150063893650178	0.288732
MT0544	122.573	129.544	113.964	126.942	-0.0670323622774184	6.94687	0.150692137218137	0.697874802799631	0.811033	Rv0522	gabP	probable 4-amino butyrate transporter
MT0545	38.6695	29.6352	28.1839	23.9501	-0.381986129057518	4.91723	2.90741	0.0881734757353328	0.195532	Rv0523c	Rv0523c	conserved hypothetical protein
MT0546	379.546	477.215	411.064	543.966	0.152046	8.82358	0.761771276761607	0.382774773966545	0.55387	Rv0524	hemL	glutamate-1-semialdehyde aminotransferase
MT0547	124.717	135.601	134.663	133.28	0.0426911756556275	7.04638	0.0643071331303489	0.799813	0.87779	Rv0525	Rv0525	conserved hypothetical protein
MT0548	120.298	101.481	117.589	107.745	0.026787692324815	6.80586	0.0234585942464633	0.878270533939017	0.928962	Rv0526	Rv0526	Possible thioredoxin protein
MT0549	53.6824	86.9639	67.9455	59.0525	-0.111518483042834	6.06717	0.233701496063134	0.628792704528835	0.762782	Rv0527	ccdA	possible cytochrome C-type biogenesis protein
MT0550	200.757	206.753	179.336	178.437	-0.187669792799852	7.58074	1.30199	0.253850530841067	0.415883	Rv0528	Rv0528	possible conserved transmembrane protein
MT0551	92.7419	107.815	98.059	81.9666	-0.157907	6.57394	0.663675475565753	0.415265353217289	0.583921	Rv0529	ccsA	cytochrome c-type biogenesis protein
MT0552	441.093	500.378	679.221	679.256	0.531781520505479	9.16766	9.20415	0.00241467385729747	0.0116073	Rv0530	Rv0530	conserved hypothetical protein
MT0553	47.3783	119.327	89.6974	166.676	0.697321823739294	6.72658	13.6109	0.000224872098921527	0.00158324	Rv0553A	Rv0553A	conserved protein
MT0554	75.3893	55.1558	87.7677	66.4265	0.24368	6.1555	1.71682	0.190103	0.340336	Rv0531	Rv0531	possible conserved membrane protein
MT0556	12.0233	37.0325	26.4882	24.072	0.244982115572832	4.64745	0.454256717641016	0.500320408043025	0.659161	Rv0532	PE_PGRS6	PE_PGRS-family protein
MT0557	290.639	208.51	238.101	206.836	-0.149752	7.88339	0.768828661650588	0.380579659294247	0.551896	Rv0533c	fabH	[beta]-ketoacyl-ACP synthase III
MT0558	44.1288	49.6541	53.0933	47.7783	0.104847242996834	5.60826	0.272549286447866	0.601626793398802	0.741566	Rv0534c	menA	4-dihydroxy-2-naphthoate octaprenyltransferase
MT0559	40.7492	39.8065	40.0539	38.8808	-0.0293997492332682	5.32141	0.019836548019259	0.887994540826619	0.934916	Rv0535	pnp	phosphorylase from Pnp/MtaP family 2
MT0560	28.531	26.8613	27.7746	24.3767	-0.0894506551046341	4.75481	0.152208609100194	0.696433604530201	0.810083	Rv0536	galE3	UDP-glucose 4-epimerase
MT0562	596.551	569.727	531.46	554.874	-0.102365	9.13767	0.349789084031215	0.554232548763034	0.701817	Rv0537c	Rv0537c	possible membrane protein,
MT0563	133.426	167.964	167.583	169.357	0.169816925592107	7.31925	0.956163061480922	0.328155488651111	0.499122	Rv0538	Rv0538	possible conserved membrane protein
MT0564	39.1245	39.6678	48.474	39.9168	0.158765018270052	5.38918	0.540264	0.462323252028433	0.624751	Rv0539	Rv0539	probable dolichyl-phosphate sugar synthase
MT0565	12.8682	10.9109	11.753	7.92242	-0.293890836960124	3.45615	1.16073	0.281315	0.448192	Rv0540	Rv0540	conserved hypothetical protein
MT0566	59.5966	61.2585	58.3559	57.2243	-0.0644431230399449	5.88812	0.115468918672882	0.734001741482801	0.833376	Rv0541c	Rv0541c	probable conserved integral membrane protein
MT0567	87.4776	84.005	129.927	122.798	0.559155705333442	6.73005	10.2238	0.00138640640400367	0.00740594	Rv0542c	menE	o-succinylbenzoic acid-CoA ligase
MT0568	2.01472	3.42123	2.22197	2.62049	-0.147517390737286	1.43385	0.193833104616778	0.659745	0.786445
MT0569	56.0221	54.9246	55.2568	40.6481	-0.226711682838726	5.69572	1.19278	0.27477	0.440272	Rv0544c	Rv0544c	possible conserved transmembrane protein
MT0570	980.711	837.045	677.291	636.902	-0.464137	9.61305	7.51502	0.00611866579153481	0.0246541	Rv0545c	pitA	low-affinity inorganic phosphate transporter
MT0571	92.287	65.2808	51.4561	44.8531	-0.692528100344049	5.99035	13.0519	0.000302978817584627	0.00204092	Rv0546c	Rv0546c	conserved protein
MT0572	151.364	156.822	143.142	168.321	0.0110626517622648	7.27636	0.00429092579514645	0.947771799239733	0.967355	Rv0547c	Rv0547c	putative oxidoreductase
MT0573	348.221	303.935	270.32	320.919	-0.143228978595439	8.28057	0.597753047674473	0.439436626675048	0.607197	Rv0548c	menB	naohthoate synthase
MT0573.1	16.5727	16.1815	16.4893	30.4709	0.460627826715505	4.3241	2.60868	0.106280377369357	0.224802
MT0574	34.0552	72.4931	54.5552	128.465	0.754604534341373	6.18017	16.234	5.5979113930997e-05	0.000465714	Rv0549c	VapC3	possible toxin vapC3
MT0575	23.9816	57.3749	28.0085	82.5151	0.38013	5.58804	3.45719	0.0629770857235034	0.151183	Rv0550c	vapB3	possible antitoxin
MT0577	72.5297	76.0068	71.9801	83.3683	0.0616050029093004	6.24954	0.112478009254602	0.73734	0.834927	Rv0551c	fadD8	acyl-CoA synthase
MT0578	53.7474	72.4468	83.2653	88.6702	0.460034	6.22209	5.85821	0.0155045429731912	0.0510203	Rv0552	Rv0552	conserved protein
MT0579	18.9773	20.4349	22.7459	24.8033	0.270428332351589	4.44973	1.25001	0.263550972955385	0.428494	Rv0553	menC	probable muconate cycloisomerase
MT0580	108.275	111.236	110.397	102.077	-0.0481273590205539	6.75638	0.0751038373368473	0.784045587809616	0.868136	Rv0554	bpoC	possible peroxidase/ non-haem peroxidase
MT0581	233.447	256.269	251.082	247.241	0.026539964575853	7.94911	0.024665890913468	0.875202460887652	0.926589	Rv0555	menD	2-succinyl-6-hydroxy-2,4-cyclohexadiene-1-carbox ylate
MT0582	108.73	64.8184	70.6352	58.4431	-0.386853205483651	6.24318	3.86936	0.0491751579174119	0.124658	Rv0556	Rv0556	possible conserved transmembrane protein
MT0583	136.351	103.284	124.84	115.972	0.0198857616345366	6.90944	0.0123874918275533	0.911379161350092	0.948318	Rv0557	mgtA	mannosyltransferase
MT0584	180.479	176.24	142.031	200.559	-0.0787274217658169	7.4507	0.180813	0.670675395069326	0.791894	Rv0558	menH	probable ubiquinone/menaquinone biosynthesis methytransferase
MT0585	692.672	732.79	1110.46	1174.96	0.681017	9.85771	16.7435	4.27875449397539e-05	0.000369866	Rv0559c	Rv0559c	possible conserved secreted protein
MT0586	34.5101	34.2585	1484.8	1227.73	5.29386	9.4417	622.878	1.76948320718447e-137	7.05139e-134	Rv0560c	Rv0560c	Possible benzoquinone methyl transferase
MT0587	41.9191	73.0016	76.7164	86.8419	0.557409071446759	6.12403	7.25412	0.00707385012190792	0.0275286	Rv0561c	Rv0561c	possible oxidoreductase
MT0588	221.294	235.186	267.221	305.684	0.325257	8.00819	3.71797	0.0538296277369106	0.133569	Rv0562	grcC1	heptaprenyl diphosphate synthase II
MT0589	271.012	348.087	532.571	760.37	1.05109	8.90121	34.9764	3.3372440326453e-09	7.40936e-08	Rv0563	htpX	probable (transmembrane) heat shock protein
MT0590	112.564	80.1677	98.2929	84.5871	-0.0593483891089846	6.55462	0.105079	0.745818303652959	0.840346	Rv0564c	gpdA1	glycerol-3-phosphate dehydrogenase
MT0591	119.128	89.9691	95.3692	85.1965	-0.199896503125019	6.60761	1.19516	0.274291545551313	0.439683	Rv0565c	Rv0565c	conserved protein
MT0592	47.7033	38.6969	32.277	28.216	-0.509655427531566	5.20294	5.7635	0.0163624035842714	0.0534023	Rv0566c	Rv0566c	conserved hypothetical protein
MT0593	521.746	352.572	364.461	295.628	-0.385962597710938	8.58384	4.66946	0.0307035548320594	0.086347	Rv0567	Rv0567	Probable methyltransferase
MT0594	559.831	729.554	612.152	773.168	0.106304010064147	9.38543	0.380237895590938	0.537475946161491	0.689138	Rv0568	cyp135B1	similar too MTCY63.32c cytochrome P-450
MT0595	32.2354	133.289	95.0769	263.512	1.2633	7.03513	42.7415	6.24715042981306e-11	1.7409e-09	Rv0569	Rv0569	conserved hypothetical protein
MT0596	157.603	525.529	416.794	1043.2	1.19482	9.06583	40.0587	2.46439588989736e-10	6.37702e-09	Rv0570	nrdZ	ribonucleotide reductase, class II
MT0597	130.112	226.217	255.936	496.492	1.05557	8.1153	36.8433	1.28015805563031e-09	3.0186e-08	Rv0571c	Rv0571c	conserved hypothetical protein
MT0598	92.3519	220.207	161.444	376.254	0.789084361058825	7.7326	22.0942	2.5959807223881e-06	3.0973e-05
MT0599	94.2367	267.318	220.384	579.8	1.17063	8.18266	45.7927	1.31453936868829e-11	4.09253e-10	Rv0572c	Rv0572c	hypothetical protein
MT0600	39.9694	198.478	125.307	369.612	1.26454	7.51942	38.0674	6.83421865268479e-10	1.66063e-08
MT0601	29.3109	55.8955	54.7306	99.5178	0.865534422869114	5.90644	20.5253	5.88481857075598e-06	6.56891e-05	Rv0573c	pncB2	nicotinic acid phosphoribosyltransferase
MT0602	79.2238	169.628	161.093	306.902	0.938503118636812	7.48648	30.4482	3.42906630409179e-08	6.07326e-07	Rv0574c	Rv0574c	probable polyglutamate synthase-like protein
MT0603	11.1784	12.2979	9.06329	5.66758	-0.704627501489977	3.2751	5.48478	0.0191827400069028	0.0606328
MT0604	30.6757	151.829	11.8115	84.2824	-1.09299	6.12617	28.3567	1.00895026212599e-07	1.63442e-06	Rv0575c	Rv0575c	possible oxidoreductase
MT0605	168.781	330.287	192.376	394.476	0.222728418138512	8.08541	1.72238	0.189386491155798	0.339651	Rv0576	Rv0576	Probablee transcriptional regulator Asr-family
MT0606	193.803	367.274	221.612	411.235	0.178186291299594	8.22214	1.0726	0.300358776112404	0.467985	Rv0577	TB27.3	conserved hypothetical protein
MT0607	299.933	547.859	322.478	472.969	-0.0542256477485947	8.68282	0.0909014706839457	0.763034235370251	0.854367	Rv0578c	PE_PGRS7	PE_PGRS-family protein
MT0608	19.6922	20.1113	19.0621	20.2936	-0.0166623037554574	4.31499	0.00466910695879674	0.945522255713407	0.965635
MT0608.1	122.443	113.178	108.935	124.504	-0.0150969073889753	6.87497	0.00704540360612782	0.933107	0.958885	Rv0579	Rv0579	conserved hypothetical protein
MT0609	90.0773	76.4691	98.5268	120.969	0.396230772710585	6.59411	4.0051	0.0453628419629238	0.117297	Rv0580c	Rv0580c	conserved protein
MT0610	25.1514	13.2226	15.0275	11.0914	-0.502659695807759	4.01909	3.54155	0.0598495629719558	0.145162
MT0611	51.9277	28.7568	29.8212	22.7922	-0.570125361263386	5.06247	6.13267	0.0132706260586068	0.0454716	Rv0583c	lpqN	equivalent to MKU20446_1 MK35
MT0612	43.4789	37.2637	31.283	34.6758	-0.288597550476008	5.20103	1.73603	0.187642585923414	0.337131	Rv0584	Rv0584	possible conserved exported protein
MT0613	53.2925	41.5171	39.3522	37.9057	-0.284371878196752	5.43036	1.75829	0.184838045275073	0.333926	Rv0585c	Rv0585c	probable conserved integral membrane protein
MT0615	162.152	278.46	232.313	348.404	0.420441469784874	7.99694	6.09193	0.013580068600469	0.0463724	Rv0586	mce2R	transcriptional regulator (GntR family)
MT0616	175.345	187.197	162.145	263.573	0.191481840212509	7.62333	1.0161	0.313446	0.483017	Rv0587	yrbE2A	part of mce2 operon
MT0617	100.281	144.246	141.153	178.498	0.399608821306074	7.14124	5.47683	0.0192701296845037	0.0608002	Rv0588	yrbE2B	part of mce2 operon
MT0618	101.386	109.341	93.1472	126.332	0.0440106303258181	6.75041	0.0587787357207503	0.808436715130656	0.88312	Rv0589	mce2A	cell invasion protein
MT0619	96.5114	83.7739	70.5767	90.6813	-0.167571940294863	6.41774	0.685248	0.407785426810916	0.57625	Rv0590	mce2B	part of mce2 operon
MT0620	14.038	11.0959	10.0573	10.8476	-0.255719414620197	3.53797	0.878776324832661	0.348537053296921	0.518447	Rv0590A	Rv0590A	mce family related protein
MT0621	8.12385	9.70889	11.6946	15.2354	0.589363497834917	3.49833	4.83842	0.0278323903036472	0.079621	Rv0591	mce2c	part of mce2 operon
MT0622	22.1619	14.5633	15.9631	17.4293	-0.107276549138241	4.13956	0.152193277801921	0.696448133349148	0.810083	Rv0592	mce2D	part of mce2 operon
MT0623	12.0233	9.4315	12.2208	11.457	0.151962622529938	3.5091	0.322550604413235	0.570078841958476	0.713718	Rv0593	lprL	part of mce2 operon
MT0624	70.515	58.1609	65.8404	56.3101	-0.0728244921617158	5.97299	0.153376971507413	0.695328868401045	0.809297	Rv0594	mce2F	part of mce2 operon
MT0625	18.6524	18.8168	13.6242	23.5844	-0.0562101403461127	4.23115	0.0422311687581214	0.837179751765835	0.901443	Rv0595c	vapC4	possible toxin
MT0626	2.01472	4.06849	2.10502	5.5457	0.290403281237223	1.83171	0.832328	0.361600183363326	0.531334	Rv0596c	vapB4	possible antitoxin
MT0627	150.844	131.532	81.1603	110.122	-0.574194645313689	6.88907	8.23513	0.0041087279328429	0.0179335	Rv0597c	Rv0597c	conserved hypothetical protein
MT0628	65.7057	66.2979	52.4501	74.5927	-0.0755947754490149	6.01957	0.141948632543176	0.706351441622215	0.815302	Rv0598c	vapC27	possible toxin
MT0629	27.2961	39.3904	21.9273	31.6288	-0.316216013360239	4.91622	2.00908	0.156360250783002	0.296812	Rv0599c	vapB27	possible antitoxin
MT0630	3.37952	3.83732	4.15157	2.74238	-0.0922813643578013	1.86719	0.0821012911303267	0.774469747031955	0.862472	Rv0601c/Rv600	Rv0601c/Rv600	sensor histidine kinase
MT0631	3.63949	4.25342	4.0931	3.83933	0.00604419549426284	2.027	0.000393565184616307	0.984172223408598	0.992368	Rv0602c	tcrA	two-component response regulator
MT0632	63.691	76.9777	66.8929	69.8392	-0.0354883454021025	6.11838	0.0365564773647336	0.848370875804318	0.910029	Rv0604	lpqO	lipoprotein
MT0633	65.7707	76.4229	51.1637	75.263	-0.190435723081263	6.07202	0.989741403651646	0.319805585909669	0.491297	Rv0605	Rv0605	resolvase
MT0635	84.0981	80.3064	66.659	84.5262	-0.129670024787682	6.30394	0.450957608519957	0.501880551830378	0.659819	Rv0606	Rv0606	transposase
MT0636	18.5874	16.4589	13.3318	14.7479	-0.317611390346902	3.9903	1.49126	0.222021	0.378424	Rv0607	Rv0607	hypothetical protein
MT0637	90.0773	103.608	94.4337	146.687	0.286415954879329	6.76571	2.3639	0.124171322205928	0.250416	Rv0608	vapB28	possible antitoxin
MT0638	79.6787	120.668	110.981	175.634	0.510100700277407	6.92907	8.68974	0.00320006843954843	0.014811	Rv0609	vapC28	possible toxin
MT0638.1	28.6609	49.3767	42.2759	63.745	0.462417488137227	5.52794	5.14077	0.0233702248657421	0.0699545
MT0639	21.317	15.3493	18.6528	19.2576	0.0672966553832173	4.22825	0.068170433642365	0.794019491640529	0.874321
MT0640	89.6873	67.8698	93.9659	76.7256	0.121965455753648	6.36042	0.442165103115052	0.506079	0.663397	Rv0610c	Rv0610c	hypothetical protein
MT0641	133.686	139.901	136.125	127.063	-0.0565418260432348	7.06943	0.112335183177606	0.737501065944949	0.834927	Rv0611c	Rv0611c	hypothetical protein
MT0642	20.2771	18.9092	18.2435	24.2548	0.106267284349717	4.35954	0.17172	0.678587917952573	0.795922	Rv0612	Rv0612	conserved hypothetical protein
MT0643	591.351	663.164	700.388	666.946	0.126105969402044	9.35663	0.513544163560603	0.473608626615831	0.635465	Rv0613c	Rv0613c	hypothetical protein
MT0644	18.7174	10.4024	8.77093	7.0083	-0.836545152650216	3.50066	8.90491	0.00284405258318845	0.0134125	Rv0614	Rv0614	conserved hypothetical protein
MT0645	21.7719	61.5359	45.5503	70.7533	0.622354603580094	5.6451	6.87741	0.0087291740792574	0.0325781	Rv0615	Rv0615	probable integral membrane protein
MT0645.2	27.7511	43.8287	25.9035	55.5788	0.127324849118349	5.26269	0.327672914695604	0.567032583801387	0.710967
MT0646	35.095	45.3544	30.8152	68.3766	0.208933081275006	5.49265	0.765124821770982	0.381729465978897	0.552759	Rv0617	VapC29	possible toxin
MT0649	25.9313	48.2208	35.3761	52.288	0.278656	5.34294	1.65099	0.198824467934105	0.350427	Rv0621	Rv0621	possible membrane protein
MT0650	17.6775	24.5034	22.4536	29.6786	0.309910848354916	4.56673	1.67582	0.195480842649338	0.346835	Rv0622	Rv0622	possible membrane protein
MT0651	18.5224	33.6575	28.6517	49.7894	0.595934985273342	5.03465	7.51859	0.00610654168154082	0.0246301	Rv0623	vapB30	possible antitoxin
MT0652	32.2354	62.3681	51.0468	90.4985	0.598487	5.8866	9.70338	0.00183929144703158	0.00934895	Rv0624	vapC30	possible toxin
MT0653	61.4813	62.4143	59.4084	46.1938	-0.241751103744661	5.84532	1.45403	0.227881621878883	0.385445	Rv0625c	Rv0625c	probable conserved transmembrane protein
MT0654	50.6928	82.6181	96.1878	102.565	0.615211613491832	6.37745	8.84875	0.00293290099450127	0.0137501	Rv0626	vapB5	probable conserved membrane protein
MT0655	10.0086	14.9794	20.1731	32.8476	1.07385	4.29345	18.4997	1.69935242048532e-05	0.00016215	Rv0627	vapC5	possible toxin
MT0656	98.0061	218.681	219.624	334.997	0.887464860156344	7.76787	22.2668	2.37278360408148e-06	2.85666e-05	Rv0628c	Rv0628c	conserved hypothetical protein
MT0657	24.1116	29.0804	22.0443	22.4875	-0.251207442567013	4.61805	1.10141	0.293957	0.462167	Rv0629c	recD	exodeoxyribonuclease V
MT0658	43.4139	39.0205	31.6338	23.036	-0.607611654230453	5.10405	7.45012	0.00634323743030379	0.0253539	Rv0630c	recB	exodeoxyribonuclease V
MT0659	54.9822	58.2071	56.3678	43.0249	-0.200053577367543	5.73514	0.910863658000142	0.339885368656275	0.51034	Rv0631c	recC	exodeoxyribonuclease V
MT0660	710.935	637.227	645.891	698.697	-0.00273575247802976	9.3951	0.000237638259250161	0.987700681667028	0.994238	Rv0632c	echA3	enoyl-CoA hydratase/isomerase superfamily
MT0661	134.206	129.96	112.97	146.87	-0.0352308468018375	7.03466	0.0383789973633952	0.844684067516807	0.906318	Rv0633c	Rv0633c	hypothetical protein
MT0662	227.533	228.529	195.943	310.315	0.113704115196282	7.91102	0.341427248622608	0.559006543268041	0.705083	Rv0634c	Rv0634c	putative glyoxylase II
MT0662.1	60.9614	101.574	76.3071	76.1162	-0.0485898834721119	6.30155	0.0508884902898785	0.821524384157379	0.891308	Rv0634A	Rv0634A	hypothetical protein
MT0663	235.982	162.139	164.133	142.726	-0.354113301530345	7.46225	4.09359	0.0430461077014267	0.112699	Rv0634B	rmpG2	50S ribosomal protein L33RpmG2
MT0664	282.645	274.669	235.178	212.869	-0.316495237171023	7.97417	3.55417	0.0593961419365741	0.14437	Rv0635	hadA	hydroxyacyl dehydratase
MT0665	237.606	224.322	216.7	181.606	-0.218808496209567	7.74935	1.69015	0.193581817730333	0.344693	Rv0636	hadB	hypothetical protein
MT0666	606.819	398.25	485.266	317.994	-0.323575246618356	8.82076	3.46024	0.0628611568599336	0.150996	Rv0637	hadC	conserved hypothetical protein
MT0667	246.25	289.279	284.938	313.119	0.162281411490141	8.14728	0.913676720054511	0.339140755122547	0.509716	Rv0638	secE1	SecE preprotein translocase
MT0668	489.641	530.244	526.256	539.883	0.0649845590440344	9.02686	0.136743262158944	0.711540359132223	0.818559	Rv0639	nusG	transcription antitermination protein
MT0669	676.099	463.53	551.516	536.714	-0.0412144006740456	9.12169	0.0475804102491111	0.827328335466086	0.893915	Rv0640	rplK	50S ribosomal protein L11
MT0669.1	1141.89	949.9	1104.55	1183.98	0.134943646098874	10.097	0.602736362374799	0.437535880384556	0.6052	Rv0641	rplA	50S ribosomal protein L1
MT0670	1316.84	848.511	1004.68	758.907	-0.275734195259903	9.94007	2.66227	0.102754232257502	0.219205	Rv0642c	mmaA4	methoxymycolic acid synthase 4
MT0671	465.399	235.926	285.874	204.399	-0.455561524186697	8.2191	5.83172	0.015739683230907	0.0516236	Rv0643c	mmaA3	methoxymycolic acid synthase 3
MT0672	607.599	421.412	411.181	346.393	-0.423160057294079	8.80331	5.56529	0.0183200210893202	0.0583109	Rv0644c	mmaA2	methoxymycolic acid synthase 2
MT0673	181.389	182.342	145.831	179.351	-0.168884672726055	7.42914	0.978810944298658	0.322492541262543	0.493712	Rv0645c	mmaA1	methoxymycolic acid synthase 1
MT0674	331.258	204.765	205.24	140.653	-0.616460286751116	7.78513	13.4218	0.000248723295170899	0.0017328	Rv0646c	lipG	probable hydrolase
MT0675	497.44	324.554	285.991	224.509	-0.665275652676058	8.38035	13.796	0.000203772544507914	0.00144748	Rv0647c	Rv0647c	conserved protein
MT0676	94.1717	116.738	81.9205	85.0137	-0.329838972709217	6.56361	3.21725	0.0728660342848579	0.16972	Rv0648	Rv0648	alpha mannosidase
MT0677	6.43409	8.83047	6.13965	6.88641	-0.218089065210735	2.8484	0.581573035260444	0.445696	0.612026	Rv0649	fabD2	malonyl coA acyl carrier protein transacylase
MT0679	4.87431	7.95205	4.50241	3.71744	-0.615747085154556	2.43447	3.55365	0.059414628101401	0.14437	Rv0650	GLKA	probable glucokinase
MT0680	461.63	277.397	419.309	357.545	0.113512343953761	8.56629	0.355651	0.550932	0.699167	Rv0651	rplJ	50S ribosomal protein L10
MT0681	187.239	126.077	221.144	160.216	0.292761352102517	7.44099	3.1518	0.075843052809606	0.17531	Rv0652	rplL	50S ribosomal protein L7/L12
MT0682	24.7615	44.8458	36.1947	55.8836	0.429707028287873	5.34159	4.02569	0.0448122144899188	0.116337	Rv0653c	Rv0653c	putative transcriptional regulator
MT0683	151.364	283.777	215.823	383.323	0.472536848293136	8.01513	7.70939	0.00549344226275052	0.0225917	Rv0654	Rv0654	probable carotenoid oxygenase
MT0684	334.638	347.116	287.336	393.562	-0.0190064187274048	8.41268	0.0106351792476289	0.917862172059285	0.951583	Rv0655	mkl	possible ribonucleotide tarnsport ATP binding ABC transporter
MT0685	18.5224	13.6387	25.1433	24.4986	0.642650697252971	4.36074	6.47598	0.0109342276877498	0.0390089	Rv0656c	vapC6	possible toxin
MT0686	37.3697	48.1746	46.6613	54.6647	0.250492	5.54958	1.55307	0.212683	0.368657	Rv0657c	vapB6	possible antitoxin
MT0687	47.9632	50.9023	42.6852	50.3379	-0.0915165189004891	5.58762	0.212345654449789	0.644935083586259	0.775284	Rv0658c	Rv0658c	probable integral membrane protein
MT0688	211.22	299.496	246.288	359.312	0.242224890505649	8.12516	2.04251	0.152956981210528	0.292202	Rv0659c	mazF2	Toxin mazF2
MT0689	87.1527	321.087	208.573	384.116	0.755011391220938	7.96796	10.9121	0.000955401167418616	0.00541575	Rv0660c	mazE2	antitoxin mazE2
MT0690	7.66892	8.09074	5.55492	6.39888	-0.399919173924608	2.81734	1.97179	0.160258455468965	0.302382	Rv0661c	vapC7	possible toxinn
MT0691	3.24954	7.25855	4.03463	4.0831	-0.292817931755153	2.26491	0.744461260899508	0.388235514262144	0.558833	Rv0662c	vapB7	possible antitoxin
MT0692	338.147	319.931	310.14	276.919	-0.166521702416258	8.28262	0.932963483671671	0.334094047842442	0.504879	Rv0663	atsD	proable arylsulfatase
MT0692.1	20.4071	21.8681	27.4822	19.3795	0.127393902988635	4.48547	0.240848956729998	0.623593624815627	0.758323	Rv0664	vapB8	possible anti toxin
MT0693	18.3924	11.512	16.4309	8.83655	-0.268870297294509	3.79609	1.03836	0.308203819142043	0.477339	Rv0665	vapC8	possible toxin
MT0694	5.13427	4.85445	6.19812	4.63157	0.102391165911457	2.41035	0.119606469455366	0.729461697617924	0.831732	Rv0666	Rv0666	possible membrane protein
MT0695	3083.36	1818.34	4172.62	2654.74	0.491181501319366	11.5178	11.9258	0.000553621868389736	0.00342044	Rv0667	rpoB	[beta] subunit of RNA polymerase
MT0696	3150.04	1288.28	3774.31	1556.76	0.266963542071798	11.2541	3.28274	0.0700118225653858	0.165087	Rv0668	rpoC	[beta]' subunit of RNA polymerase
MT0697	73.4396	69.904	43.9131	64.6592	-0.424846412853631	5.97942	4.14618	0.0417285448296147	0.110037	Rv0669c	Rv0669c	possible hydrolase
MT0699	314.556	569.681	460.941	1140.59	0.777071038771512	9.27974	17.0977	3.55048473316083e-05	0.000314415	Rv0670	end	endonuclease IV (apurinase)
MT0700	149.674	228.483	220.209	390.027	0.664904225951089	7.94961	15.0509	0.000104651951074115	0.000814527	Rv0671	lpqP	probable esterase
MT0701	206.606	217.71	328.5	285.817	0.530669212182478	8.02108	9.34725	0.00223320638029026	0.0110004	Rv0672	fadE8	acyl-CoA dehydrogenase (aka aidB)
MT0702	50.1079	54.0462	68.4717	70.5705	0.417411	5.92859	4.97913	0.0256548997662358	0.0748032	Rv0673	echA4	enoyl-CoA hydratase/isomerase superfamily
MT0703	46.2085	55.202	53.6781	46.6204	-0.0147590812576136	5.65964	0.00493795750492154	0.943978280856456	0.965327	Rv0674	Rv0674	conserved hypothetical protein
MT0704	11.1784	27.4161	32.4524	27.5457	0.758671237149359	4.63131	5.01073	0.0251907500843163	0.0740163	Rv0675	echA5	enoyl-CoA hydratase/isomerase superfamily
MT0705	543.648	946.293	571.28	1694.55	0.456701	9.87507	5.0006	0.0253385360947341	0.0743003	Rv0676c	mmpL5	conserved large membrane protein
MT0706	155.133	281.465	199.217	647.018	0.782978947756886	8.32561	12.9305	0.000323268576312532	0.00215063	Rv0677c	mmpS5	conserved small membrane protein
MT0706.1	34.9001	169.906	78.8214	345.6	1.09688	7.29862	40.4402	2.02730084841495e-10	5.35019e-09	Rv0678	Rv0678	transcription regulator of MmpS5-MmpL5 efflux pump
MT0707	84.3581	68.0085	91.9193	74.7145	0.129738286858113	6.31928	0.499209023896552	0.479847876527781	0.64103	Rv0679c	Rv0679c	conserved threonine rich protein
MT0708	105.805	103.007	128.523	116.947	0.231773477136954	6.82884	1.74941	0.185950934627781	0.334998	Rv0680c	Rv0680c	probable conserved transmembrane protein
MT0709	282.32	223.027	182.201	215.856	-0.339199488879826	7.8199	3.24868	0.0714810679017559	0.167621	Rv0681	Rv0681	probable transcriptional factor
MT0710	468.779	327.929	424.571	324.454	-0.0791924000277845	8.59445	0.206097851882227	0.649843212786256	0.778835	Rv0682	rpsL	30S ribosomal protein S12
MT0711	394.559	271.248	392.411	308.609	0.0890542638248558	8.41702	0.257698616858825	0.611705662504398	0.748546	Rv0683	rpsG	30S ribosomal protein S7
MT0712	1926.98	1071.58	1754.24	1131.38	-0.0286408082476862	10.5227	0.0317846925865979	0.858501027401578	0.916197	Rv0684	fusA1	elongation factor G
MT0713	1592.27	936.307	1490.77	892.796	-0.0818530614566277	10.2622	0.255573215963523	0.613177858175221	0.749314	Rv0685	tuf	elongation factor EF-Tu
MT0714	168.261	137.959	187.873	199.523	0.34585	7.43883	3.91259	0.0479256922622091	0.12226	Rv0686	Rv0686	probable membrane protein
MT0715	48.4182	123.765	181.851	276.554	1.52936	7.30159	54.5176	1.54060196546686e-13	5.43301e-12	Rv0687	Rv0687	probable short chain type oxidoreductase
MT0716	208.815	219.005	272.659	325.916	0.479406	8.00397	7.91412	0.00490504113923219	0.020597	Rv0688	Rv0688	probable ferredoxin reductase
MT0717.1	3.5095	1.98801	3.74226	2.43767	0.185805	1.59233	0.334766584445233	0.562865739315071	0.707577
MT0718	301.297	247.346	308.854	264.731	0.0668573775940937	8.13269	0.155871927289922	0.692986	0.807943	Rv0690c	Rv0690c	conserved hypothetical protein
MT0719	152.338	145.171	151.737	154.731	0.0432370524877626	7.23941	0.0652506007314226	0.798381757252898	0.876944	Rv0691c	Rv0691c	involved in mycofactonin biosynthesis /transcriptional regulator (TetR/AcrR family)
MT0719.1	259.183	570.698	566.193	513.312	0.486429488712006	8.89931	3.3906	0.065569114019892	0.156463	Rv0691a	Rv0691a	mycofactocin precursor protein
MT0719.2	935.283	665.891	861.597	665.91	-0.0591990681831967	9.61152	0.122738818927549	0.726082796173874	0.829541	Rv0692	Rv0692	putative mycofactonin system protein MftB
MT0720	532.145	361.125	426.501	295.933	-0.303263234447738	8.6583	3.05538	0.0804703284100657	0.18355	Rv0693	pqqE	coenzyme pqq synthesis protein E
MT0721	505.304	399.128	429.892	255.346	-0.438496734673226	8.63491	5.56616	0.0183108738862008	0.0583109	Rv0694	lldD1	L-lactate dehydrogenase (cytochrome)
MT0722	202.186	127.649	157.584	98.3599	-0.367736754489429	7.19517	4.79132	0.0286035051215243	0.0813279	Rv0695	Rv0695	probable mycofactonin system creatinine amidohydrolase family protein MftE
MT0723	120.103	73.7876	95.1938	51.6176	-0.424490116406815	6.41401	5.24583	0.0219994537148802	0.0667767	Rv0696	Rv0696	probable mycofactonin biosynthesis glycosyltransferase MftF
MT0724	17.0276	9.84759	11.5192	5.18005	-0.735543140865856	3.45828	7.06213	0.00787303110546408	0.0298516	Rv0697	Rv0697	Probable dehydrogenase
MT0725	17.6775	23.0239	17.7173	16.1496	-0.256532562198127	4.23053	0.989967622599719	0.31975	0.491297
MT0726	6.62906	8.13698	6.6659	4.50969	-0.420296	2.72568	1.79296	0.180565953447035	0.328264
MT0727	969.208	455.717	628.291	527.512	-0.207423868153331	9.33374	0.925610146947292	0.336006	0.506424	Rv0700	rpsJ	30S ribosomal protein S10
MT0728	875.621	531.909	761.901	587.661	-0.0285629397417709	9.42913	0.025460836299203	0.873224129112977	0.926589	Rv0701	rplC	50S ribosomal protein L3
MT0729	396.509	324.231	516.958	343.528	0.233150608698386	8.62721	1.66872	0.196430227517451	0.347745	Rv0702	rplD	50S ribosomal protein L4
MT0730	261.848	155.296	237.283	137.789	-0.157263319765706	7.63043	0.896898370061493	0.343614735748082	0.513415	Rv0703	rplW	50S ribosomal protein L23
MT0731	530.39	343.371	648.873	312.448	0.0777466429303255	8.84193	0.175808306393435	0.675000542114927	0.794411	Rv0704	rplB	50S ribosomal protein L2
MT0732	439.013	203.841	335.283	161.008	-0.364709	8.15416	4.60098	0.0319537550111827	0.089046	Rv0705	rpsS	30S ribosomal protin S19
MT0733	243.586	98.892	180.915	83.612	-0.336615549711378	7.24631	3.83755	0.0501166160783225	0.126416	Rv0706	rplV	50 ribosomal potein
MT0734	585.242	267.781	474.215	217.318	-0.302365549323535	8.59329	3.03417	0.0815280359359828	0.185228	Rv0707	rpsC	30S ribosomal protein S3
MT0735	205.241	92.2807	153.55	69.1689	-0.417250060976116	7.02395	6.07451	0.0137146233541257	0.0465923	Rv0708	rplP	50S ribosomal protein L16
MT0736	175.41	73.9725	144.077	60.7589	-0.283871471674841	6.82826	2.64093	0.104142841848971	0.221575	Rv0709	rpmC	50S ribosomal protein L29
MT0737	271.402	124.135	261.023	104.21	-0.153422833735544	7.57195	0.842005	0.358824007787333	0.528814	Rv0710	rpsQ	30S ribosomal protein S17
MT0738	565.225	508.515	729.215	671.578	0.384390753091662	9.27318	4.91342	0.0266487597388206	0.0770648	Rv0711	atsA	arylsulfatase
MT0739	184.444	169.536	221.437	224.326	0.333943	7.64415	3.97747	0.0461128089056349	0.118555	Rv0712	Rv0712	probable formylglycine-generating enzyme
MT0740	119.648	128.99	111.508	98.1162	-0.248364668274704	6.84155	1.90772	0.167216545789616	0.310801	Rv0713	Rv0713	probable conserved transmembrane protein
MT0740.1	42.504	29.4965	29.0025	21.3296	-0.509820191926531	4.93951	5.24084	0.0220626347755791	0.0669099
MT0741	591.221	418.777	431.88	444.753	-0.183129686997873	8.8819	0.898957189965529	0.343061480791664	0.513415	Rv0714	rplN	50S ribosomal protein
MT0741.1	340.552	286.227	320.431	266.072	-0.0965987770212462	8.24521	0.315951	0.574051067325761	0.717114	Rv0715	rplX	50S ribosomal protein L24
MT0742	475.213	277.073	349.434	260.648	-0.266127909180999	8.41229	2.13468	0.144000729767692	0.279781	Rv0716	rplE	50S ribosomal protein L5
MT0742.1	107.69	86.8252	112.853	65.9999	-0.162938928386943	6.54612	0.717794637008652	0.396868262310254	0.566774	Rv0717	rpsN1	30S ribosomal protein S14
MT0743	472.223	325.248	419.66	249.252	-0.276890615148685	8.51844	2.44118	0.118187337047726	0.241351	Rv0718	rpsH	30S ribosomal protein S8
MT0744	480.022	274.346	407.614	235.235	-0.228907	8.44872	1.74734	0.186211	0.335315	Rv0719	rplF	50S ribosomal protein L6
MT0745	108.795	76.2379	107.005	53.1412	-0.270258	6.43292	1.86156	0.172444758817672	0.317263	Rv0720	rplR	50S ribosomal protein L18
MT0746	247.03	188.676	258.625	140.044	-0.181177192576171	7.70528	0.979461749801743	0.322331727596835	0.493656	Rv0721	rpsE	30S ribosomal protein S5
MT0747	62.8461	31.5308	44.9071	24.3157	-0.430825468846619	5.35712	4.07258	0.0435846637222881	0.113817	Rv0722	rpmD	50S ribosomal protein L30
MT0748	787.169	382.9	532.98	265.279	-0.546059983491699	8.94301	9.77076	0.00177309123352603	0.00907031	Rv0723	rplO	50S ribosomal protein L15
MT0749	571.269	937.925	1030.93	1348.27	0.687415589790812	9.92514	15.695	7.44193352705025e-05	0.000606464	Rv0724	sppA	protease IV, signal peptide peptidase
MT0751	607.404	480.775	1300.55	909.982	1.00944	9.68785	34.9601	3.36535766612952e-09	7.40936e-08	Rv0726c	Rv0726c	possible S-adenosyl L-methionine dependent methyltransferase
MT0752	16.0527	15.0257	18.5359	14.5651	0.0813168567809381	4.01397	0.0995926453677933	0.752319024170515	0.845219	Rv0727c	fucA	L-fuculose phosphate aldolase
MT0753	17.1576	23.3938	21.7519	24.4376	0.200161941973348	4.4468	0.661531266850258	0.416019868488085	0.58457	Rv0728c	serA2	similar to D-3-phosphoglycerate dehydrogenases
MT0754	53.6824	67.0838	100.807	88.853	0.655824	6.28021	10.8253	0.00100122900559599	0.00565943	Rv0729	xylB	xylulose kinase
MT0755	263.733	233.846	299.147	288.925	0.243486	8.0849	2.04509	0.152697455364071	0.292202	Rv0730	Rv0730	GCN5-related-N-acetyltransferase
MT0756	60.3765	58.9469	48.8833	49.7284	-0.274851770327453	5.77082	1.97788	0.159613937390848	0.301451	Rv0731c	Rv0731c	possible S-adenosyl L-methionine dependent methyltransferase
MT0756.1	1111.41	757.247	693.78	539.273	-0.584840177880153	9.59904	11.6309	0.000648664655389896	0.00391063	Rv0732	secY	possible S-adenosyl L-methionine dependent methyltransferase
MT0757	227.208	195.103	193.604	138.094	-0.364511570430506	7.55929	4.57171	0.0325041418594068	0.0901146	Rv0733	adk	probable adenylate kinase
MT0758	237.216	172.31	182.669	115.911	-0.474103739291389	7.46868	7.76926	0.00531427949004433	0.0220561	Rv0734	map'A	probable methionine aminopeptidase
MT0759	60.0515	39.4366	42.042	31.0803	-0.429544218494972	5.43469	4.14199	0.0418320040865142	0.110106	Rv0735	sigL	sigma-70 factors ECF subfamily
MT0760	26.7112	25.1507	25.1433	24.3767	-0.0660783825551394	4.67	0.0811137651490661	0.775793706637741	0.863317	Rv0736	rslA	hypothetical protein
MT0761	3.70448	2.63527	2.33891	2.31579	-0.425979	1.51302	1.67973	0.194960576712862	0.346504
MT0762	18.9123	14.7945	17.1325	17.734	0.059855036800592	4.10814	0.0534307273660986	0.817197591999365	0.889242	Rv0737	Rv0737	putative transcriptional regulator
MT0763	83.1882	149.702	216.057	212.991	0.940515662765843	7.3716	18.8738	1.39660158516632e-05	0.000138789	Rv0738	Rv0738	conserved protein
MT0764	29.0509	22.9777	32.6278	21.939	0.0512434488976505	4.74165	0.0487966035361431	0.825170661303296	0.893318	Rv0739	Rv0739	conserved hypothetical protein
MT0765	20.4071	21.9606	24.5586	19.3185	0.0405338750011098	4.4382	0.0257039146487159	0.872625535588331	0.926589	Rv0740	Rv0740	conserved hypothetical protein
MT0766	149.349	186.966	163.022	199.645	0.110445	7.45011	0.452793350167394	0.501011413242424	0.65979
MT0767	72.2048	49.3767	56.4263	56.1273	-0.0856998575244693	5.87359	0.16991	0.680191814635129	0.796522	Rv0741	Rv0741	probable transposase truncated
MT0768	9.03372	11.9743	21.9273	13.8947	0.742047420146724	3.84026	5.73647	0.0166161936178225	0.0540094	Rv0742	PE_PGRS8	PE_PGRS-family protein
MT0768.1	9.42367	3.74486	5.3795	3.77839	-0.420790632548051	2.50165	1.75141	0.185699379509392	0.33496
MT0769	53.8774	33.1489	35.6684	36.3213	-0.232344282457095	5.31641	0.954524221980066	0.328570362940755	0.499372	Rv0743c	Rv0743c	hypothetical protein
MT0770	53.5524	62.0907	45.4919	52.288	-0.241637786171374	5.7409	1.51839	0.217862894165968	0.374151	Rv0744c	Rv0744c	putative transcriptional regulator
MT0772.1	23.8516	77.9023	37.3642	38.3933	-0.195377947651555	5.47744	0.344269611409828	0.557375	0.703783	Rv0746	PE_PEGRS9	PE_PGRS-family protein
MT0772.2	3.24954	3.79109	2.63128	2.55955	-0.438849234852627	1.67001	1.88865	0.169353917573701	0.313313
MT0772.5	32.6254	223.027	74.3775	207.385	0.530251915324791	7.07173	4.14803	0.041683084760197	0.110037	Rv0747	PE_PGRS10	PE_PGRS-family protein
MT0772.6	14.8829	34.1661	26.0204	36.2603	0.435352122506731	4.80581	2.9329	0.0867914722392513	0.193436	Rv0748	vapB31	possible antitoxin
MT0773	57.5819	56.0804	64.2032	63.3184	0.166093660170586	5.91662	0.779337	0.377344006634623	0.548811	Rv0749	vapC31	conserved hypothetical protein
MT0773.1	35.615	31.9006	24.3832	22.8531	-0.513730804230736	4.84814	5.11706	0.0236917826539667	0.0707204
MT0774	357.384	650.126	376.214	518.248	-0.126952480901002	8.89371	0.470080446676491	0.492950161643903	0.653398	Rv0750	Rv0750	conserved hypothetical protein
MT0775	72.2048	112.392	84.3763	110.548	0.0992143801462654	6.57002	0.293286651578146	0.588122023984589	0.728299	Rv0751c	mmsB	methylmalmonate semialdehyde oxidoreductase
MT0776	46.3384	77.7174	27.3068	31.385	-1.03834	5.51871	21.6577	3.25902331912495e-06	3.77535e-05	Rv0752c	fadE9	acyl-CoA dehydrogenase
MT0777	105.48	217.109	47.8893	74.4098	-1.34439	6.79959	50.6919	1.08065891746274e-12	3.55903e-11	Rv0753c	mmsA	methylmalmonate semialdehyde dehydrogenase
MT0778	51.0178	156.776	39.9954	106.404	-0.457983059214725	6.47118	5.93239	0.0148650831133107	0.0493645	Rv0754	PE_PGRS11	PE_PGRS-family protein
MT0779	88.5175	161.907	144.486	139.069	0.241654688455836	7.06212	1.20247	0.272828844449843	0.438294	Rv0755c	PPE12	PPE-family protein
MT0780	94.4317	122.332	94.1413	81.9057	-0.292293	6.61962	2.13723	0.143760878117937	0.279462	Rv0755A	Rv0755A	putative transposase
MT0781	140.12	207.817	184.95	256.382	0.351413658019605	7.62527	4.53024	0.0333008672076046	0.0917097
MT0782	252.294	367.366	212.666	415.683	-0.0332721725160182	8.286	0.0326539325430986	0.856599925606429	0.915383	Rv0757	phoP	two-component response regulator
MT0783	185.549	225.755	157.643	245.351	-0.0567052223960615	7.67027	0.105279194128798	0.745584082176271	0.840346	Rv0758	phoR	sensor histidine kinase
MT0784	182.624	106.983	115.835	110.244	-0.307309152828394	7.01137	2.33346	0.126620457678888	0.25407	Rv0759c	Rv0759c	conserved hypothetical protein
MT0785	224.153	124.228	146.942	110.122	-0.392364724224097	7.24271	4.6424	0.0311912708402525	0.0872874	Rv0760c	Rv0760c	homolog of Delta(5)-3 ketosteroid isomerase
MT0786	344.906	230.517	263.829	215.307	-0.242713983126196	8.04296	1.94665	0.162948248064052	0.304859	Rv0761c	adhB	zinc-containing alcohol dehydrogenase
MT0787	32.6254	28.2945	25.4942	26.8144	-0.216102206005658	4.82865	0.884129979921312	0.347073000829764	0.517235	Rv0762c	Rv0762c	conserved hypothetical protein
MT0787.1	12.6732	10.3562	10.6421	11.3961	-0.0558437715243596	3.50742	0.0423032588343695	0.837042788036688	0.901443	Rv0763c	Rv0763c	conserved hypothetical protein
MT0788	60.1815	58.3921	50.2867	74.5927	0.0493682284597021	5.93007	0.055424559246859	0.813879496220743	0.887605	Rv0764c	cyp51	possible lanosterol 14-demethylase cytochrome P450
MT0789	21.5769	28.2945	21.0502	33.8836	0.115470067272134	4.71817	0.241613833333068	0.623042941451016	0.758323	Rv0765c	Rv0765c	short-chain alcohol dehydrogenase family
MT0790	78.3789	102.267	74.7283	151.257	0.250997303172067	6.66921	1.54015	0.214594895915175	0.370039	Rv0766c	cyp123	cytochrome p-450
MT0791	31.2606	46.0017	34.0312	78.9195	0.457587955635597	5.57494	4.21852	0.0399850975663122	0.106797	Rv0767c	Rv0767c	putative transcriptional regulator (TetR family)
MT0792	69.9301	89.5992	94.7845	136.57	0.524158404938274	6.61226	8.33583	0.00388706785657746	0.0171729	Rv0768	aldA	aldehyde dehydrogenases
MT0793	33.9252	26.5376	35.6684	32.2991	0.177745537426648	5.00939	0.664445306858365	0.414994955522268	0.583747	Rv0769	Rv0769	probable dehydrogenase
MT0794	19.8872	14.3784	19.6469	16.6371	0.0958378107706346	4.14869	0.145696204526413	0.702682622706509	0.813462	Rv0770	Rv0770	probable dehydrogenase
MT0795	16.2477	12.8527	17.7173	13.7728	0.112354439311094	3.93086	0.191162649271634	0.661951	0.786964	Rv0771	Rv0771	probable 4-carboxymuconolactone decarboxylase
MT0796	111.719	83.4503	78.1782	62.8309	-0.462358368412219	6.39489	6.27955	0.0122139087182171	0.0424716	Rv0772	purD	phosphoribosylamine-glycine ligase
MT0797	265.163	123.395	134.721	80.8697	-0.794581549728896	7.23956	19.6336	9.38054690977022e-06	9.83723e-05	Rv0773c	ggtA	putative [gamma]-glutamyl transpeptidase
MT0798	253.594	185.209	188.984	138.947	-0.419431	7.58337	6.4321	0.0112076262681309	0.0396999	Rv0774c	Rv0774c	probable, iron stress inducinle extracellular esterase
MT0799	103.66	139.346	125.892	145.224	0.169301898388452	7.00735	0.961026039419863	0.326928503223039	0.497963	Rv0775	Rv0775	conserved hypothetical protein
MT0800	21.9669	24.7808	44.2639	34.1274	0.734494549919725	4.97242	9.61011	0.00193509505642491	0.00974528	Rv0776c	Rv0776c	conserved hypothetical protein
MT0801	224.933	266.81	285.172	308.06	0.274713927892061	8.08406	2.5835	0.107982657727249	0.226718	Rv0777	purB	adenylosuccinate lyase
MT0802	219.734	151.829	178.108	135.108	-0.235827921079672	7.42034	2.04329	0.152878945448242	0.292202	Rv0778	cyp126	similar linalool 8-monooxygenase, cytochrome p-450
MT0803	8.12385	9.47773	10.4666	10.482	0.253035688323706	3.28593	0.855588658036421	0.354976125982276	0.52466	Rv0779c	Rv0779c	possible conserved transmembrane protein
MT0804	155.978	79.1044	94.9014	71.4846	-0.432984514153647	6.65038	4.70804	0.0300219400608961	0.0846542	Rv0780	purC	phosphoribosylamioimidazole-succinocarboxyamide synthase
MT0805	519.147	324.786	348.557	230.482	-0.534859767999444	8.47509	9.43127	0.00213317052404342	0.0105784	Rv0781/Rv0782	ptrBa/ptrBb	protease II, [beta] subunit
MT0806	17.1576	10.6798	11.5192	10.482	-0.303209130623167	3.65027	1.21561	0.270224720987317	0.436043
MT0807	240.271	185.763	168.168	159.302	-0.368252432840668	7.55828	4.59864	0.0319972464866003	0.0891048	Rv0783c	emrB	multidrug resistance protein
MT0808	57.2569	88.1198	119.285	134.194	0.830713953594645	6.6414	18.3985	1.79197826041242e-05	0.00017043	Rv0784	Rv0784	conserved hypothetical protein
MT0809	142.98	99.493	113.554	86.0497	-0.271124762063673	6.78947	2.41867	0.119896933075363	0.24377	Rv0785	Rv0785	probable Ksd-like steroid dehydrogenase
MT0810	28.9859	31.2072	44.0885	48.3877	0.618923301349906	5.2583	8.54486	0.00346498469269025	0.0156769	Rv0786c	Rv0786c	conserved hypothetical protein
MT0811	23.2017	17.1524	16.5478	14.9307	-0.344258	4.17489	1.8627	0.172313537048873	0.317168	Rv0787	Rv0787	hypothetical protein
MT0812	41.3991	107.491	95.4862	138.216	0.778216898086198	6.58168	12.1994	0.000478042244480464	0.00300948	Rv0787A	Rv0787A	conserved protein
MT0813	186.199	226.125	262.543	291.606	0.431103395767677	7.91727	6.63911	0.00997639196907118	0.036574	Rv0788	purQ	phosphoribosylformylglycinamidine synthase I
MT0814	54.5923	35.0445	102.444	76.5428	1.01688	6.07135	28.8629	7.76865484380927e-08	1.28457e-06	Rv0789c	Rv0789c	hypothetical protein
MT0815	53.9424	39.8989	121.74	68.1328	0.974081	6.15023	24.6692	6.80620977784681e-07	9.32053e-06	Rv0790c	Rv0790c	hypothetical protein
MT0816	49.9129	33.3801	125.015	77.8226	1.27306	6.16234	44.7682	2.21799033122838e-11	6.54718e-10	Rv0791c	Rv0791c	conserved hypothetical protein
MT0817	170.276	155.99	522.572	385.456	1.46129	8.26991	64.7865	8.34695651026917e-16	3.57663e-14	Rv0794c	lpdB	dihydrolipoamide dehydrogenase
MT0818	17.6125	10.9109	23.5061	21.2687	0.687513142218999	4.20272	6.87422	0.00874479189692172	0.0325987	Rv0797	Rv0797	putative transposase for insertion sequence element IS1547
MT0819	174.89	108.878	110.28	86.8419	-0.496345415070842	6.91072	7.49819	0.00617609247973401	0.0247603	Rv0798c	cfp29	29kDA antigen cfp29
MT0820	248.46	179.984	186.528	187.518	-0.177245663626572	7.64906	0.955245061735013	0.328387795725323	0.499285	Rv0799c	Rv0799c	probable dye-decolorizing peroxidase
MT0821	91.3121	109.063	95.3692	88.0608	-0.123495690328894	6.5861	0.427936877699842	0.513003031188174	0.668514	Rv0800	pepC	aminopeptidase I
MT0822	63.756	52.5667	61.338	65.6342	0.132664710534554	5.929	0.461067377942221	0.497125554774774	0.657281	Rv0802c	Rv0802c	acetyltransferase
MT0823	454.026	494.229	457.258	415.501	-0.120111806726858	8.8309	0.457488598992803	0.498800024540677	0.658824	Rv0803	purL	phosphoribosylformylglycinamidine synthase II
MT0824	40.2293	56.4965	54.906	41.1966	-0.00503054317155358	5.59508	0.000436097887046571	0.983339022119085	0.992052	Rv0804	Rv0804	conserved hypothetical protein
MT0825	889.724	1220.08	1177.53	1476.19	0.339556731951445	10.218	4.30819	0.0379292034313912	0.102162	Rv0805	Rv0805	possible nucleotide phosphodiesterase
MT0826	233.252	132.966	323.706	220.487	0.600810913208917	7.83093	12.5207	0.000402466513533456	0.00260785	Rv0806c	cpsY	probable UDP-glucose-4-epimerase
MT0828	27.1012	30.976	33.9727	33.3351	0.214980570691072	4.97556	0.937423959322942	0.332941215100703	0.504284	Rv0807	Rv0807	conserved hypothetical protein
MT0829	740.44	872.321	762.954	1089.88	0.182360645159878	9.75908	1.12368	0.289128	0.456126	Rv0808	purF	amidophosphoribosyltransferase
MT0830	364.728	360.57	327.74	319.396	-0.164605331451241	8.42301	0.909277	0.340306382130838	0.51078	Rv0809	purM	5'-phosphoribosyl-5-aminoimidazole synthase
MT0831	476.123	724.931	522.923	859.095	0.190226	9.33515	1.20735	0.271857200192973	0.437364	Rv0810c	Rv0810c	conserved hypothetical protein
MT0832	192.178	317.62	262.719	428.116	0.440828063917024	8.23017	6.55906	0.0104351708078849	0.0377635	Rv0811c	Rv0811c	conserved hypothetical protein
MT0833	33.7952	45.7705	40.2293	35.8947	-0.0515872618899115	5.2873	0.0502145091032276	0.822690431530252	0.892087	Rv0812	pabC	probable amino acid aminotransferase
MT0834	120.038	137.311	205.824	207.994	0.688152387132806	7.39146	16.6456	4.50554188025664e-05	0.000383645	Rv0813c	Rv0813c	possible fatty acid binding protein
MT0835	95.8614	107.722	226.816	173.257	0.963372197047416	7.2386	25.3878	4.68876557478539e-07	6.60238e-06
MT0836	355.305	341.013	715.474	621.971	0.938378091376039	8.99022	28.0173	1.20238780264804e-07	1.90139e-06	Rv0814c	sseC2	thiosulfate sulfurtransferase
MT0837	1169.96	758.681	1513.69	1529.09	0.691309862707166	10.2795	13.1647	0.000285267935220794	0.00194102	Rv0815c	cysA2	thiosulfate sulfurtransferase
MT0838	14.103	16.2277	74.2605	87.3904	2.41263	5.58742	131.213	2.22454573794002e-30	2.46245e-28	Rv0816c	thiX	equivalent to M. leprae ThiX
MT0839	39.9044	32.6866	34.382	34.7977	-0.0620182113880701	5.15169	0.0804401545640658	0.776701810911441	0.863363	Rv0817c	Rv0817c	probable exported protein
MT0840	286.285	419.933	361.538	534.703	0.342647897057082	8.64651	3.89943	0.0483026166958199	0.122876	Rv0818	Rv0818	two-component response regulator
MT0841	121.013	171.524	139.341	193.734	0.189456	7.29026	1.29473	0.255178715710338	0.41727	Rv0819	mshD	GCN5-related-N-acetyltransferase
MT0842	102.231	99.0769	89.5219	103.113	-0.0664929749243383	6.62348	0.132077490784795	0.716287675759942	0.821885	Rv0820	phoT	phosphate transport system ABC transporter
MT0843	368.563	410.594	582.623	666.215	0.679478	8.98614	15.0259	0.00010604385353666	0.000820753	Rv0821c	phoY2	phosphate transport system regulator
MT0844	370.448	354.56	392.411	361.141	0.054801526465517	8.53041	0.0998943326177795	0.751956475886704	0.84505	Rv0822c	Rv0822c	conserved hypothetical protein
MT0845	510.698	883.833	269.969	380.094	-1.06884	8.99805	34.2012	4.96994386698691e-09	1.0479e-07	Rv0823c	Rv0823c	transcriptional regulator (NifR3/Smm1 family)
MT0846	1549.32	2832.82	887.91	1194.03	-1.02493	10.6584	35.5866	2.43957598635335e-09	5.61949e-08	Rv0824c	desA1	acyl-[ACP] desaturase
MT0847	42.569	42.3493	51.5731	51.4958	0.279436531068406	5.55784	1.95678	0.161858502223269	0.303961	Rv0825c	Rv0825c	conserved hypothetical protein
MT0848	1380.21	1358.14	1367.1	1525.25	0.0768520984384422	10.4592	0.225821098835468	0.63464	0.766738	Rv0826	Rv0826	conserved hypothetical protein
MT0849	25.2814	53.0291	29.5288	72.5206	0.341600304153143	5.49891	2.65266	0.103376909540214	0.220239	Rv0827c	kmtR	metal sensor transcriptional regulator (ArsR family)
MT0850	19.2373	15.2106	19.0037	16.2105	0.0369374629117831	4.13087	0.0217624464831276	0.882720802673121	0.932073	Rv0829	Rv0829	probable transposase fragment, highly similarsim
MT0851	146.749	192.93	792.892	774.996	2.21926	8.8978	129.445	5.41999684775722e-30	5.83748e-28	Rv0830	Rv0830	probable S-adenosylmethionine dependent methyltransferase
MT0852	755.713	537.642	561.632	561.456	-0.182849110955085	9.23891	0.938688491126811	0.332615356555964	0.504225	Rv0831c	CFP-31	immunoantigen
MT0854	44.5837	64.0325	44.6148	45.4016	-0.249568110078604	5.63788	1.41436	0.234334697667996	0.393755	Rv0832	PE_PGRS12	PE_PGRS-family protein
MT0854.1	7.47394	36.5702	19.0037	23.7673	0.334961771184846	4.45127	0.712989951973441	0.398453003718005	0.567859	Rv0833	PE_PGRS13	PE_PGRS-family protein
MT0855	83.4482	627.888	343.177	917.599	1.28969	8.94595	19.2178	1.16619757095186e-05	0.000118857	Rv0834c	PE_PGRS14	PE_PGRS-family protein
MT0856	97.3562	82.1557	124.723	107.257	0.370986087942095	6.68616	4.44503	0.0350030233914125	0.0956046	Rv0835	lpqQ	lipoprotein
MT0856.1	35.8749	18.9092	25.2603	20.6592	-0.192476409462821	4.65899	0.577863901740997	0.447150823377192	0.612651
MT0857	13.7131	18.6781	11.4607	17.6731	-0.166512067328126	3.95498	0.415166817247242	0.519358614167318	0.674495	Rv0836c	Rv0836c	hypothetical protein
MT0858	16.0527	27.1387	15.9631	26.7534	-0.0145534556924981	4.43367	0.00357441380092216	0.952325756256034	0.970593	Rv0837c	Rv0837c	hypothetical protein
MT0860	59.5966	67.5462	111.625	97.0802	0.713459608378624	6.39353	13.5887	0.000227554350350514	0.00159649	Rv0838	lpqR	lipoprotein
MT0861	54.5273	69.6266	93.9074	123.955	0.808359418232492	6.41975	19.3374	1.09541874041405e-05	0.000112797	Rv0839	Rv0839	conserved hypothetical protein
MT0862	19.4972	17.3373	16.197	16.698	-0.160266292390751	4.13278	0.405101527966181	0.524466306305509	0.678058	Rv0840c	pip	probable proline iminopeptidase
MT0864	29.0509	34.3972	31.4584	34.4321	0.0575365818101355	5.02034	0.0698161432856778	0.791604663408295	0.873351	Rv0842	Rv0842	probable conserved integral membrane protein
MT0865	12.6082	13.1301	14.8521	15.8448	0.253823831510788	3.82986	0.964192141568507	0.326132925915283	0.497536	Rv0843	Rv0843	probable dehydrogenases
MT0866	143.825	136.109	147.001	151.745	0.094314317113547	7.17771	0.308572631243706	0.578557399407679	0.720879	Rv0844c	narL	two-component response regulator
MT0867	66.2906	58.8544	62.1566	56.9805	-0.0697584803390125	5.93498	0.138488483043369	0.709788	0.816855	Rv0845	NarS	sensor histidine kinase
MT0868	7.34396	8.41437	10.1743	6.76453	0.0774365252658717	3.05206	0.0666347137443779	0.796301172647687	0.875624
MT0869	35.095	37.0787	76.3655	70.7533	1.02615	5.77939	26.4359	2.72423158659365e-07	3.9912e-06	Rv0846c	Rv0846c	Multicopper oxidase/ copper resistance
MT0870	25.1514	31.2534	167.817	209.213	2.74027	6.76078	214.123	1.73173916251712e-48	5.32357e-46	Rv0847	lpqS	lipoprotein
MT0873	5.6542	3.32876	7.36758	3.10803	0.159682254691901	2.31079	0.270845	0.602766	0.74251	Rv0850	Rv0850	transposase fragment
MT0874	47.7033	40.2688	43.6207	45.2797	0.0204240172246539	5.47	0.009376259902794	0.922860534050271	0.954229	Rv0851c	Rv0851c	Short-chain dehydrogenases/reductase
MT0875	42.439	40.6387	29.3534	29.9833	-0.484994	5.15871	5.10947	0.0237956003462401	0.0709771	Rv0852	fadD16	acyl-CoA synthase
MT0876	164.167	149.008	243.715	231.7	0.603467027853487	7.62388	13.3378	0.000260104009444509	0.00179328	Rv0853c	pdc	pyruvate (or indolepyruvate) decarboxylase
MT0877	51.7327	56.9588	29.1195	33.9445	-0.787460351939791	5.42854	13.9105	0.000191726101973061	0.00137663	Rv0854	Rv0854	conserved hypothetical protein
MT0878	89.9473	84.6061	67.3022	65.878	-0.389604735211674	6.26771	4.50881	0.0337206235852678	0.0926097	Rv0855	far	fatty acyl-CoA racemase
MT0879	42.8289	37.0325	44.2055	42.903	0.129101216030812	5.38709	0.368348	0.543906203633983	0.693367	Rv0856	Rv0856	conserved hypothetical protein
MT0880	69.0852	97.9674	69.1734	106.953	0.0649324759253967	6.42492	0.125130143262315	0.723535696510456	0.828056	Rv0857	Rv0857	conserved hypothetical protein
MT0881	105.675	74.5273	78.1197	52.9584	-0.464168113527205	6.28398	6.41466	0.0113182241422153	0.039985	Rv0858c	dapC	probable N-succinyldiamidopimelate aminotransferase
MT0882	748.954	757.294	601.393	780.237	-0.136620539493633	9.49602	0.579009963633382	0.446700645419675	0.612651	Rv0859	fadA	[beta] oxidation complex, subunit (acetyl-CoA
MT0883	1068.71	1051.84	804.411	870.248	-0.341615177388265	9.89014	4.18829	0.0407041636138828	0.108065	Rv0860	fadB	hypothetical protein
MT0884	135.051	124.875	127.354	122.615	-0.0554637415252125	6.99531	0.108028	0.742400446093066	0.838805	Rv0861c	errc3	probable DNA helicase
MT0885	126.602	123.118	149.223	105.551	0.00770302952023076	6.97999	0.00176254216466987	0.966513	0.981037	Rv0862c	Rv0862c	conserved protein
MT0886	217.329	455.023	372.764	712.835	0.712689034018644	8.78009	16.471	4.94002994215395e-05	0.000417962	Rv0863	Rv0863	conserved hypothetical protein
MT0887	448.632	647.028	634.664	1059.78	0.606352104558503	9.44634	12.1158	0.000499961310616512	0.0031228	Rv0864	moaC2	probable molybdenum cofactor biosynthesis protein C2
MT0888	90.2072	174.575	130.979	293.252	0.644470517435842	7.4294	14.52	0.000138682323883971	0.00104867	Rv0865	mog	molybdopterin biosynthesis
MT0889	25.2814	58.1609	40.3463	75.8724	0.524323	5.64524	6.77928	0.00922219347418211	0.0339967	Rv0866	moaE2	probable molybdenum cofactor biosynthesis protein E2
MT0890	735.371	348.596	248.276	172.282	-1.29224	8.55542	43.208	4.92184540113099e-11	1.40097e-09	Rv0867c	rpfA	possible resuscitation-promoting factor
MT0891	77.729	60.1489	73.1495	55.2132	-0.105487858713915	6.05885	0.327590574773048	0.567081301100654	0.710967	Rv0868c	moaD2	molybdopterin converting factor subunit 1
MT0892	260.938	255.852	287.628	271.008	0.111732114961658	8.07129	0.433076837542643	0.510483040198452	0.666769	Rv0869c	moaA2	molybdenum cofactor biosynthesis, protein A
MT0892.1	161.372	178.135	198.632	180.266	0.158174044586058	7.48959	0.850971327331258	0.356277699156882	0.525864	Rv0870c	Rv0870c	probable conserved integral membrane protein
MT0893	207.776	123.118	155.655	128.465	-0.178271153734802	7.26534	0.951322147592734	0.329382984223483	0.500225	Rv0871	cspB	probable cold shock protein
MT0894	76.2342	558.446	243.481	474.553	0.716219	8.40238	4.2282	0.0397576704112519	0.106292	Rv0872c	PE_PGRS15	PE_PGRS-family protein
MT0896	393.194	458.583	448.428	500.088	0.157272295182681	8.81439	0.817510841820024	0.365908943756242	0.536084	Rv0873	fadE10	acyl-CoA dehydrogenase
MT0897	39.2545	74.065	70.9276	134.803	0.858763864719321	6.31975	21.3913	3.74464672533304e-06	4.30204e-05	Rv0874c	Rv0874c	conserved hypothetical protein
MT0898	41.6591	59.0856	47.0706	71.1799	0.223130457632596	5.77797	1.29563	0.255013284545454	0.417171	Rv0875c	Rv0875c	possible exported protein
MT0899	357.06	518.409	448.955	706.741	0.388878261850621	8.98843	4.91041	0.026695236901752	0.0770873	Rv0876c	Rv0876c	possible conserved transmembrane protein
MT0900	122.248	261.447	309.497	381.8	0.941342849534721	8.07078	19.8884	8.20976091869892e-06	8.77102e-05	Rv0877	Rv0877	conserved hypothetical protein
MT0901	16.8976	12.9452	19.2376	14.1385	0.157326558511186	3.99158	0.379334705256072	0.537959506031848	0.689398	Rv0878c	PPE13	PPE-family protein
MT0902	46.7284	78.827	91.3931	58.3212	0.264626932116964	6.10751	0.867270047390946	0.351712185193887	0.521613	Rv0879c	Rv0879c	possible conserved transmembrane protein
MT0904	54.5273	32.1318	37.4226	29.3739	-0.337904261776166	5.26518	2.34476	0.125705099171764	0.252498	Rv0881	Rv0881	possible rRNA methyltransferase
MT0905	6.17413	6.56506	8.12773	5.36287	0.0536524583491617	2.73863	0.0312332546779075	0.859721004603053	0.916775	Rv0882	Rv0882	possible conserved transmembrane protein
MT0906	222.204	272.358	235.47	287.096	0.0798342393437601	7.99097	0.228131355995327	0.632912874732288	0.765915	Rv0883c	Rv0883c	conserved hypothetical protein
MT0907	322.549	310.685	378.027	355.473	0.211613993058073	8.41698	1.49621	0.221254744568145	0.377636	Rv0884c	serC	phosphoserine aminotransferase
MT0908	149.219	282.714	107.181	237.795	-0.362333552566576	7.60268	4.5464	0.032987989090892	0.0911631	Rv0885	Rv0885	conserved hypothetical protein
MT0909	60.3765	109.202	52.3332	91.7173	-0.229364653160407	6.29553	1.56825	0.210460699085572	0.365759	Rv0886	fprB	ferredoxin, ferredoxin-NADP reductase
MT0910	17.9375	20.7585	29.8212	32.4819	0.688826800749307	4.66439	8.66812	0.00323825852679872	0.0149357	Rv0887c	Rv0887c	hypothetical protein
MT0910.2	3.70448	2.8202	4.56088	4.14404	0.426356779802065	1.96651	1.96397	0.161089392770807	0.303379
MT0910.4	6.69405	3.375	11.2853	7.06924	0.901922583609442	2.84657	9.68474	0.00185804590368706	0.00943225
MT0911	115.229	102.868	130.862	123.59	0.224190413327556	6.88561	1.66313	0.197180936115677	0.34865	Rv0888	Rv0888	probable extracellular nuclease
MT0912	212.52	287.753	256.053	387.589	0.349568126772666	8.16036	4.13303	0.0420539170281048	0.110617	Rv0889c	citA	citrate synthase 2
MT0914	389.36	205.366	214.712	130.537	-0.756670715617809	7.87703	19.972	7.85828024605936e-06	8.44077e-05	Rv0890c	Rv0890c	transcriptional regulator (LuxR/UhpA family)
MT0915	218.369	123.303	129.868	93.2408	-0.577236091238762	7.14249	10.6506	0.00110036771004135	0.00609023	Rv0891c	Rv0891c	putative transcriptional regulator
MT0915.1	21.7719	11.327	35.7854	20.3545	0.779568282963072	4.48518	10.1606	0.00143471469896666	0.00761297
MT0916	421.205	289.88	306.573	249.191	-0.338359450510996	8.30748	3.66019	0.0557273687511583	0.137337	Rv0892	Rv0892	putative monooxygenase
MT0917	47.5733	31.577	20.2316	15.6011	-1.12627	4.8505	23.5359	1.22607034107663e-06	1.57103e-05	Rv0893c	Rv0893c	possible S-adenosyl L-methionine dependent methyltransferase
MT0918	9.94359	7.99828	4.26852	4.57063	-1.01143	2.76749	11.6466	0.000643197522026938	0.00388355	Rv0894	Rv0894	putative transcriptional regulator
MT0919	19.4972	16.6901	14.8521	13.3462	-0.357439358605875	4.0186	1.96395	0.161092	0.303379	Rv0895	Rv0895	possible traiacylglycerol synthase
MT0920	1644.4	1202.33	1562.34	1385.27	0.0652217165747104	10.5005	0.156814412851645	0.692107	0.807154	Rv0896	gltA2	citrate synthase 1
MT0921	102.166	169.998	136.3	236.21	0.445485688406219	7.33353	7.04666	0.00794132036134735	0.0300533	Rv0897c	Rv0897c	possible oxidoreductase
MT0921.1	46.4034	92.6044	77.3596	135.412	0.641009	6.46058	11.7288	0.00061541657062352	0.0037499	Rv0898c	Rv0898c	hypothetical protein
MT0922	109.575	128.805	105.251	122.249	-0.0667581392456951	6.86531	0.147743078795106	0.700701550719583	0.812659	Rv0899	ompA	member of OmpA family
MT0923	15.4678	14.887	12.2208	12.7978	-0.278381459543736	3.80307	1.13767	0.286144699440373	0.453214	Rv0900	Rv0900	possible membrane protein
MT0924	38.3446	47.2499	41.6327	38.5761	-0.0881375535697008	5.37767	0.159966953419726	0.689186943773792	0.804691	Rv0901	Rv0901	conserved hypothetical protein
MT0925	222.464	305.275	289.616	375.34	0.339191	8.22059	3.87004	0.0491554442652366	0.124658	Rv0902c	prrB	sensor histidine kinase
MT0926	253.139	360.339	298.387	499.296	0.354283708615458	8.46315	4.00067	0.0454820783467874	0.117387	Rv0903c	prrA	two-component response regulator
MT0927	63.496	73.7414	61.338	56.9805	-0.211566382232941	6.0003	1.22416	0.268545787511657	0.434492	Rv0904c	accD3	acetyl/propionyl CoA carboxylase [beta] subunit
MT0928	426.08	446.054	445.212	535.982	0.164277406791438	8.85625	0.865057373838169	0.352327280652439	0.522264	Rv0905	echA6	enoyl-CoA hydratase/isomerase superfamily (aka
MT0929	272.571	298.155	290.435	287.523	0.0195010809454537	8.16636	0.0130228207708569	0.909144590933082	0.947481	Rv0906	Rv0906	conserved protein
MT0930	297.788	230.517	223.893	182.094	-0.375860566086678	7.86839	5.13228	0.0234849100082822	0.0702081	Rv0907	Rv0907	probable penicillin binding protein
MT0931	277.901	200.281	176.296	135.169	-0.611993714007918	7.62583	13.721	0.00021206510713714	0.0015037	Rv0908	ctpE	metal cation transporter ATPase P-type CtpE
MT0933	57.2569	78.5033	75.3715	80.8697	0.218248260272207	6.19227	1.30321	0.253627696758158	0.415757	Rv0909	Rv0909	TA system
MT0934	223.958	182.204	167.7	169.54	-0.260554145523385	7.53883	2.30731	0.128766752602947	0.257211	Rv0910	Rv0910	TA system
MT0934.1	104.245	67.4537	75.1376	66.0608	-0.251848	6.29132	1.67633	0.195413	0.346835	Rv0911	Rv0911	conserved hypothetical protein
MT0936	29.1809	23.9948	15.1445	18.2216	-0.669716579861796	4.4427	6.71181	0.00957762076030688	0.0352118	Rv0912	Rv0912	possible conserved transmembrane protein
MT0937	24.6965	17.9383	21.4595	19.6842	-0.0347943359656179	4.3954	0.0194749423919092	0.889013453473296	0.935495
MT0938	87.2177	92.5119	81.3942	85.9278	-0.103108949684553	6.44096	0.318292546282495	0.572635573363265	0.71557	Rv0913c	Rv0913c	probable dioxygenase
MT0939	126.537	153.308	122.325	137.972	-0.100682365083095	7.07851	0.361946406567768	0.547427233332815	0.696113	Rv0914c	Rv0914c	possible lipid carrier protein
MT0940	15.1429	30.0976	23.8569	36.0166	0.450923386618998	4.72297	3.54782	0.0596237521374016	0.144702	Rv0915c	PPE14	PPE-family protein
MT0941	17.7425	24.6421	21.9858	30.349	0.304750419614078	4.57289	1.62618	0.202232740086328	0.354552	Rv0916c	PE7	PE-family protein
MT0942	76.4292	69.0718	72.7987	66.3655	-0.0639247849952008	6.15535	0.118564405065071	0.730596753767086	0.832074	Rv0917	betP	glycine betaine transport
MT0943	5.97915	4.85445	4.50241	5.5457	-0.102920579084137	2.41304	0.115223	0.734275	0.833376
MT0944	36.3949	76.3304	51.8654	111.401	0.528641213925192	6.11115	8.21963	0.00414396122902243	0.0180477	Rv0918	Rv0918	conserved hypothetical protein
MT0945	37.1098	68.8869	47.7723	94.7034	0.412892253113859	5.95988	4.82047	0.028123751585508	0.0802387	Rv0919	Rv0919	GCN5-related-N-acetyltransferase
MT0946	12.0233	9.75513	12.6301	9.32408	0.0035349085744211	3.46458	0.000173573951388839	0.989488377083506	0.994561
MT0947	175.215	133.752	142.381	110.914	-0.284757524190612	7.13618	2.87684	0.0898620451361125	0.198016	Rv0920c	Rv0920c	probable transposase, related to IS1081
MT0948	13.3231	55.1558	28.1254	49.0581	0.434880455188833	5.1928	2.28411	0.130705310479334	0.26043	Rv0921	Rv0921	possible resolvase
MT0949	927.874	1015.04	1045.44	1218.59	0.217914895796567	10.0387	1.7413	0.186973612218599	0.336232	Rv0922	Rv0922	possible transposase
MT0950	84.1631	60.7962	63.3261	42.1107	-0.469581081078363	5.97048	6.25369	0.0123934663742005	0.0429461	Rv0923c	Rv0923c	conserved hypothetical protein
MT0951	91.962	49.9315	65.665	40.0387	-0.403232	5.95396	4.56975	0.0325413204075326	0.0901162	Rv0924c	mntH	Divalent cation-transport integral membrane protein MntH
MT0952	197.247	149.794	154.31	122.676	-0.321199	7.28644	3.70694	0.0541866622904944	0.134204	Rv0925c	Rv0925c	conserved protein
MT0953	180.934	127.695	155.479	120.116	-0.153661	7.19137	0.827519348110826	0.362990817522512	0.532591	Rv0926c	Rv0926c	conserved hypothetical protein
MT0954	157.083	127.371	144.896	131.512	-0.0351939848334422	7.13258	0.0431628092810854	0.835419012993304	0.900743	Rv0927c	Rv0927c	probale short-chain alcohol dehydrogenase family
MT0955	508.033	613.047	806.691	784.807	0.511586301123632	9.40569	8.21019	0.00416558424052469	0.0180665	Rv0928	pstS3	periplasmic phosphate-binding lipoprotein
MT0956	170.731	155.157	184.657	152.232	0.0428370473961714	7.37334	0.0640753361886865	0.800166933824306	0.877796	Rv0929	pstC2	membrane-bound component of phosphate transport
MT0957	137.066	136.618	128.289	114.997	-0.172081206624514	7.01523	1.01987	0.312549541649466	0.482008	Rv0930	pstA1	PstA component of phosphate uptake
MT0958	1521.11	1819.91	1444.69	1940.63	0.00919239288502704	10.7157	0.00342535134404898	0.953329253755887	0.971119	Rv0931c	pknD	serine-threonine protein kinase
MT0959	1299.75	1803.64	1353.59	1930.69	0.0783977686151639	10.6412	0.252665	0.615204619091451	0.7511	Rv0932c	pstS2	PstS component of phosphate uptake
MT0960	219.539	133.382	129.05	93.1799	-0.642528715970519	7.16876	13.8013	0.000203199721275701	0.00144598	Rv0933	pstB	ABC transport component of phosphate uptake
MT0961	474.628	220.808	262.777	157.473	-0.671012663795661	8.12415	14.0096	0.000181881357041455	0.00132504	Rv0934	phoS1	PstS component of phosphate uptake
MT0962	204.786	103.654	108.818	66.6702	-0.775526	6.9197	18.7011	1.52895210214006e-05	0.000150421	Rv0935	pstC1	PstC component of phosphate uptake
MT0963	68.4353	39.8527	40.5802	23.036	-0.771927356208841	5.42868	13.3621	0.000256754454150291	0.00177633	Rv0936	pstA2	PstA component of phosphate uptake
MT0964	51.9927	54.601	44.7902	52.3489	-0.137369782839145	5.67384	0.477796515540184	0.489422103414202	0.650332	Rv0937c	mku	DNA end-binding protein
MT0965	203.876	291.683	157.877	240.903	-0.322170824457435	7.80554	3.71838	0.053816640341207	0.133569	Rv0938	ligD	ATP dependent DNA ligase LigD
MT0966	176.97	316.186	184.774	294.653	-0.0202440094005613	7.9265	0.0143421828207408	0.904674177999735	0.945235	Rv0939	Rv0939	probable dehydrase
MT0967	98.2661	136.433	111.859	194.77	0.351719152732842	7.08161	4.06029	0.0439030635883075	0.114349	Rv0940c	Rv0940c	probable monooxygenase
MT0968	77.924	80.1677	84.6687	125.662	0.385731633616252	6.52688	3.82439	0.0505118570074688	0.127238	Rv0941c	Rv0941c	conserved hypothetical protein
MT0968.1	17.3525	27.8322	29.061	38.5761	0.603945	4.82404	6.7895	0.00916958282277151	0.0338593
MT0969	2.7946	3.14383	3.04059	2.80332	-0.0261999684275859	1.61522	0.00672667383822301	0.934633749792649	0.958885	Rv0943c	Rv0943c	probable monooxygenase
MT0970	38.9295	23.8099	18.9452	15.662	-0.823441608174926	4.61085	11.0086	0.000906895412817406	0.00517021	Rv0944	Rv0944	possible formamidopyrimidine-DNA glycosylase
MT0971	105.935	93.3441	72.8572	78.1882	-0.397495357987913	6.45439	4.4237	0.0354431753633249	0.0965421	Rv0945	Rv0945	ketoacyl reductase
MT0972	154.288	131.07	126.36	153.512	-0.0295123124187943	7.14377	0.0251250486451227	0.874055864639675	0.926589	Rv0946c	pgi	glucose-6-phosphate isomerase
MT0974	20.927	8.69177	17.0741	10.3601	-0.028945956816933	3.84233	0.0110016271201658	0.916464172003157	0.951583	Rv0947c	Rv0947c	probable mycolyl transferase, pseudogene
MT0975	255.934	174.344	205.824	149.917	-0.266179298312448	7.61915	2.57981	0.108234325011141	0.227007	Rv0948c	Rv0948c	possible chorismate mutase
MT0976	204.461	220.068	199.919	213.357	-0.0385594887913498	7.71128	0.0539721923919192	0.81629	0.889242	Rv0949	uvrD1	DNA-dependent ATPase I and helicase II
MT0977	888.359	544.207	172.027	136.753	-2.18084	8.76633	131.432	1.99196891005964e-30	2.268e-28	Rv0950c	Rv0950c	conserved hypothetical protein
MT0978	744.405	620.075	560.755	588.819	-0.241626552098108	9.29605	1.78701	0.181291413953841	0.328837	Rv0951	sucC	succinyl-CoA synthase [beta] chain
MT0979	618.973	485.907	467.023	358.154	-0.423223908978125	8.91475	5.89027	0.0152247819093672	0.0502241	Rv0952	sucD	succinyl-CoA synthase [alpha] chain
MT0980	18.2624	19.0017	19.4715	18.9529	0.0439859453337958	4.25072	0.0324881982194248	0.856960366606662	0.915383	Rv0953c	Rv0953c	similar to alkanal monooxygenase beta chains
MT0981	772.416	620.907	688.869	604.42	-0.101995404813568	9.3918	0.346714356556163	0.555978972016571	0.703134	Rv0954	Rv0954	cell envelope antigen
MT0982	427.64	343.186	383.64	310.071	-0.151515337054035	8.51665	0.762178081177229	0.382647756115259	0.55387	Rv0955	purM	possible magnesium dependent cell divison regulation
MT0983	71.6849	46.4178	50.4036	42.842	-0.312700835025314	5.72613	2.27954	0.131090331766252	0.260806	Rv0956	purN	phosphoribosylglycinamide formyltransferase I
MT0984	268.607	196.305	245.294	185.811	-0.105158893801358	7.80804	0.401576491738709	0.526276212035681	0.679606	Rv0957	purH	phosphoribosylaminoimidazolecarboxamide
MT0985	136.481	169.073	263.829	279.966	0.838805898873505	7.73095	24.104	9.12711453165795e-07	1.21145e-05	Rv0958	Rv0958	similar to magnesium-chelatase subunit
MT0986	132.451	155.111	290.902	251.202	0.914735793456898	7.69713	25.6526	4.08738312079866e-07	5.85907e-06	Rv0959	Rv0959	hypothetical protein
MT0987	10.0736	9.80136	13.5072	11.457	0.323434076927594	3.50066	1.46382	0.226323838842021	0.383461
MT0988	25.9313	23.8561	38.5336	31.9335	0.495809129089616	4.91497	4.87358	0.0272709312654297	0.0782395	Rv0960	vapC9	possible toxin
MT0989	59.4666	76.4691	62.0982	69.9611	-0.0337219252846813	6.06875	0.032707699377525	0.856483195850772	0.915383	Rv0961	Rv0961	probable integral membrane protein
MT0990	8.5138	4.43835	4.56088	4.26592	-0.488185973784028	2.4689	2.36152	0.124361041479553	0.250672	Rv0962c	lprP	possible lipoprotein
MT0992	13.4531	9.33903	8.47856	7.61771	-0.481237618519048	3.29643	3.00579	0.0829674874233784	0.187563	Rv0963c	Rv0963c	conserved hypothetical protein
MT0992.1	6.69405	4.43835	5.26256	4.02215	-0.247169694212247	2.37996	0.697584493723726	0.403596531599435	0.572097	Rv0964c	Rv0964c	hypothetical protein
MT0993	36.3949	26.214	33.8558	25.3518	-0.0764690460612954	4.93335	0.118647474515608	0.730506067142235	0.832074	Rv0965c	Rv0965c	conserved hypothetical protein
MT0994	188.148	192.097	177.524	168.382	-0.137047521994932	7.50505	0.683947135219881	0.408230846937478	0.576471	Rv0966c	Rv0966c	conserved hypothetical protein
MT0995	12.0233	24.4572	17.6588	22.4875	0.206390529131796	4.27019	0.601505126444543	0.438004	0.605637	Rv0967	csoR	copper sensitive operon repressor
MT0996	33.7952	65.8818	49.9358	68.3157	0.303256887219363	5.77128	2.0645	0.150764784761033	0.28982	Rv0968	Rv0968	conserved hypothetical protein
MT0997	133.166	177.303	140.276	190.687	0.0901027925094127	7.32626	0.291449713673405	0.589293014018243	0.729069	Rv0969	ctpV	cation transport ATPase
MT0998	107.365	105.226	90.6914	86.7201	-0.261279966530264	6.60906	2.12096	0.145295155637229	0.281873	Rv0970	Rv0970	possible conserved integral membrane protein
MT0999.1	26.1263	52.428	13.6826	35.6509	-0.736591	5.00574	10.5606	0.0011552280515207	0.00634102	Rv0971c	echA7	enoyl-CoA hydratase/isomerase superfamily
MT1000	109.445	167.871	48.1816	117.983	-0.841773592007852	6.7946	17.0693	3.60400207839841e-05	0.000316342	Rv0972c	fadE12	acyl-CoA dehydrogenase
MT1001	81.4335	195.796	50.0528	152.232	-0.529011494698495	6.90734	8.4597	0.00363101307506906	0.0162397	Rv0973c	accA2	probable acetyl-/propionyl coA carboxylase alpha chain
MT1002	57.1269	94.6848	22.8629	69.7783	-0.870606106170627	5.93687	13.9417	0.000188570071617544	0.00136133	Rv0974c	accD2	acetyl/propionyl-CoA carboxylase, [beta] subunit
MT1003	35.55	105.734	25.4357	82.3323	-0.419288	5.96413	4.87691	0.0272182724321333	0.078201	Rv0975c	fadE13	acyl-CoA dehydrogenase
MT1003.1	81.9534	181.695	44.4978	160.947	-0.521500883731264	6.8756	6.40152	0.0114022995263979	0.0402108	Rv0976c	Rv0976c	conserved hypothetical protein
MT1006.1	2.98958	5.40924	7.83536	9.81162	1.10219	2.72797	13.2533	0.00027210184360507	0.0018687	Rv0978c	PE_PGRS17	PE_PGRS-family protein
MT1007	129.007	91.3098	78.0028	55.1523	-0.726533070410045	6.46717	15.4704	8.38095972565184e-05	0.000673068	Rv0979A	rpmF	50S ribosomal proteinL32
MT1008	8.5138	16.9212	24.0323	24.4376	0.998917343397972	4.21703	11.7226	0.000617464609224981	0.00375664	Rv0980c	PE_PGRS18	PE_PGRS-family protein
MT1009	84.683	154.51	200.153	242.609	0.943653850736823	7.41454	24.9353	5.92883430355014e-07	8.20361e-06	Rv0981	mprA	two-component response regulator
MT1010	281.15	437.224	442.523	688.885	0.655142	8.8535	14.0739	0.000175769866230903	0.00128758	Rv0982	mprB	sensor histidine kinase
MT1011	575.104	673.612	844.465	1075.56	0.614713829978391	9.62989	13.1637	0.000285430496769838	0.00194102	Rv0983	pepD	probable serine protease
MT1012	374.542	474.21	651.68	648.42	0.625015	9.06965	11.6095	0.000656156516424851	0.00394982	Rv0984	moaB2	molybdenum cofactor biosynthesis, protein B
MT1013	71.6199	60.565	48.9418	56.1273	-0.328778603432219	5.89293	2.66604	0.102511	0.219038	Rv0985c	mscL	highly similar to large-conductance mechanosensitive
MT1014	159.292	109.71	83.967	84.8309	-0.647512920691939	6.77547	11.1464	0.000841963864179969	0.004891	Rv0986	Rv0986	Probable ABC transporter
MT1015	283.62	210.683	155.889	109.756	-0.901944884063975	7.57059	29.4964	5.60214425721539e-08	9.41964e-07	Rv0987	Rv0987	probable adhesion component ABC transporter permease
MT1017	45.7535	48.452	33.5049	19.8061	-0.86685	5.20981	12.0296	0.000523616314223574	0.00326033	Rv0988	Rv0988	possible exported protein
MT1018	98.2661	98.7071	72.7402	91.9001	-0.267691	6.50015	1.98903	0.158442084385686	0.299806	Rv0989c	grcC2	possible exported protein
MT1019	168.651	270.554	227.693	479.124	0.629829592525438	8.163	12.1009	0.000503981983914593	0.00314299	Rv0990c	Rv0990c	probable heat shock protein
MT1020	319.625	867.004	574.086	1475.95	0.806049038969999	9.66052	22.8524	1.74930905794455e-06	2.15154e-05	Rv0991c	Rv0991c	conserved hypothetical protein
MT1021	28.9859	72.8167	59.8177	69.1079	0.477220175713012	5.85361	3.41143	0.0647461426533582	0.154777	Rv0992c	Rv0992c	probable 5-formyltetrahydrofolate cyclo-ligase
MT1022	62.5212	65.6506	34.6744	39.5512	-0.790287926182203	5.66465	15.6193	7.74582088406198e-05	0.000628658	Rv0993	galU	UTP-glucose-1-phosphate uridylyltransferase
MT1023	137.716	224.507	185.944	241.39	0.267922916745992	7.62584	2.43178	0.118897803464322	0.242233	Rv0994	moeA1	molybdopterin biosynthesis
MT1024	43.2839	52.7054	63.3846	58.2603	0.346123973047824	5.76886	2.84126	0.0918721288333383	0.201381	Rv0995	rimJ	acetylation of 30S S5 subunit
MT1025	280.37	679.576	392.119	890.237	0.436545221695123	9.13111	6.38093	0.0115352730604117	0.0406078	Rv0996	Rv0996	probable conserved transmembrane protein
MT1025.1	27.1662	23.2089	17.308	19.0138	-0.467985086783838	4.44529	3.52857	0.0603197739776353	0.146124
MT1025.2	55.8921	91.6797	52.9764	70.9971	-0.224968117538781	6.08801	1.41411	0.234375491462411	0.393755
MT1026	44.9736	40.0376	32.8033	37.662	-0.270781261505004	5.28465	1.5424	0.214260343403654	0.370039	Rv0997	Rv0997	hypothetical protein
MT1027	68.1104	109.248	70.5767	118.532	0.0849269761710844	6.51958	0.218821775845292	0.639939136152955	0.771347	Rv0998	Rv0998	possible acetyltransferase Pat
MT1028	68.4353	72.077	50.3451	52.0442	-0.456350683311323	5.92713	5.96162	0.0146206301453046	0.0488224	Rv0999	Rv0999	hypothetical protein
MT1029	101.386	142.12	86.189	174.11	0.0318108339044749	6.97813	0.0284402813293809	0.866077875909119	0.921827	Rv1000c	Rv1000c	conserved hypothetical protein
MT1030	217.329	258.765	218.513	281.49	0.0648183264869304	7.93158	0.148948868571463	0.699541887576703	0.811718	Rv1001	arcA	arginine deiminase
MT1031	243.976	178.089	175.243	142.604	-0.399094602964847	7.53202	5.70111	0.0169541603388531	0.0549734	Rv1002c	Rv1002c	dolichyl phosphate mannose-protein mannosyltransferase
MT1032	18.7823	22.4692	21.8104	17.0637	-0.0918463674126438	4.3331	0.121919378167597	0.726962021067947	0.83007	Rv1003	Rv1003	rRNA small subunit methyltransferase
MT1033	64.5359	97.8749	97.3573	100.31	0.312417714863964	6.49419	2.37753	0.123091903755165	0.248743	Rv1004c	Rv1004c	possible membrane protein
MT1034	100.606	98.0598	159.806	142.665	0.604092053194102	6.97027	12.1302	0.000496108595913369	0.00310434	Rv1005c	pabB	p-aminobenzoate synthase
MT1035	695.012	470.419	487.02	343.894	-0.482543863582533	8.96344	7.63501	0.0057246151544979	0.0234216	Rv1006	Rv1006	hypothetical protein
MT1036	272.766	234.724	257.865	307.268	0.153982410774729	8.06748	0.695114164299326	0.404430292065522	0.572727	Rv1007c	metS	methionyl-tRNA synthase
MT1037	34.9651	23.7637	24.3247	19.3795	-0.409655228057882	4.6842	3.05702	0.0803889414819795	0.183476	Rv1008	tatD	probable deoxyribonuclease
MT1038	517.847	379.941	338.324	274.664	-0.541159518202785	8.56148	9.5331	0.00201798761516821	0.0101153	Rv1009	rpfB	resuscitation -promoting factor RpfB
MT1039	215.64	139.808	172.378	104.028	-0.374480019547642	7.30435	5.00689	0.025246611970965	0.0740852	Rv1010	ksgA	16S rRNA dimethyltransferase
MT1040	130.177	129.729	148.872	119.872	0.0397238904802606	7.04741	0.0518955529657603	0.819797	0.889676	Rv1011	ispE	involved in isoprenoid biosynthesis
MT1040.1	12.0233	8.04451	8.88787	8.65372	-0.166648064183716	3.24805	0.341045	0.559226663489785	0.705083
MT1041	702.486	511.058	2155.84	1800.89	1.71741	10.3361	103.903	2.12474210879982e-24	1.48546e-22	Rv1013	pks16	polyketide synthase
MT1042	135.441	74.1112	99.17	82.0885	-0.152243269026568	6.61163	0.570411	0.450095451153556	0.614467	Rv1014c	pth	peptidyl-tRNA hydrolase
MT1043	459.745	363.575	342.3	358.398	-0.223075624793952	8.57406	1.45609	0.227552679683144	0.385052	Rv1015c	rplY	50S ribosomal protein L25
MT1044	130.827	78.4109	90.516	65.3905	-0.397436799020944	6.51381	4.57743	0.0323957150535264	0.0900257	Rv1016c	lpqT	similar to M. kansasii Q49597
MT1045	767.347	553.453	587.009	636.049	-0.0928907584777629	9.31303	0.227699891134307	0.633234594137734	0.766052	Rv1017c	prsA	ribose-phosphate pyrophosphokinase
MT1046	565.42	452.434	391.066	322.016	-0.511243928207589	8.7577	8.72199	0.00314394542272832	0.0145682	Rv1018c	glmU	probable UDP-N-acetylglucosamine pyrophosphorylase
MT1047	71.2949	132.226	114.256	187.274	0.590051580121894	6.9817	11.7718	0.000601356258892233	0.00367547	Rv1019	Rv1019	transcriptional regulator (TetR/AcrR family)
MT1048	277.706	369.77	300.375	342.432	0.000958132190297529	8.33403	2.99163002068781e-05	0.995635928700469	0.996136	Rv1020	mfd	transcription-repair coupling factor
MT1049	172.291	121.639	107.239	94.094	-0.527454928894054	6.95324	8.60041	0.00336087950985865	0.0153767	Rv1021	Rv1021	possible nucleoside triphosphate pyrophosphohydrolase
MT1050	71.4899	92.327	67.1268	68.1938	-0.264920028083177	6.22717	1.94123	0.163534942241926	0.305669	Rv1022	lpqU	lipoprotein
MT1051	227.533	205.181	181.149	136.327	-0.459195876008592	7.552	7.22615	0.00718492808672839	0.027825	Rv1023	eno	enolase
MT1052	88.7125	54.4623	67.0684	45.1578	-0.337451284553582	5.99878	3.28646	0.0698536821123451	0.164909	Rv1024	cdpA	involved in cell division
MT1053	52.3176	40.6849	36.1947	23.4626	-0.661405286914069	5.25834	9.36954	0.00220620488380274	0.0108808	Rv1025	cdpB	involved in cell division
MT1054	41.1392	28.2483	27.5407	13.8338	-0.799457240328038	4.7968	11.0813	0.0008720417866143	0.0050218	Rv1026	Rv1026	probable exoployphosphatase
MT1054.1	123.288	120.437	57.7712	86.5372	-0.783415189640515	6.60183	14.7354	0.000123702604477755	0.000944358
MT1056	23.9816	20.0188	25.3772	28.4598	0.295539750166132	4.61829	1.45059	0.228432816105914	0.38605	Rv1027c	kdpE	two-component response regulator
MT1057	68.2404	100.788	92.7379	132.792	0.419920561330517	6.62585	5.46079	0.0194478718161086	0.0610268	Rv1028c	kdpD	sensor histidine kinase
MT1057.1	11.8283	8.27568	5.55492	4.32686	-1.01377	2.92677	12.579	0.000390112013473348	0.00253605
MT1058	224.803	119.928	109.227	80.504	-0.809294155276846	7.06292	19.3973	1.06158247112405e-05	0.000110454	Rv1029	kdpA	potassium-transporting ATPase A chain
MT1059	151.039	80.3989	84.6102	49.0581	-0.774954801838091	6.51361	17.8796	2.35336024133445e-05	0.00021759	Rv1030	kdpB	potassium-transporting ATPase B chain
MT1060	48.4182	32.178	32.5109	26.5096	-0.427961938855045	5.12944	3.79194	0.051499800054762	0.128992	Rv1031	kdpC	potassium-transporting ATPase C chain
MT1061	67.0705	64.4948	61.0457	69.9611	-0.00857365842165498	6.039	0.00207752639067849	0.963645097806448	0.979124	Rv1032c	trcS	sensor histidine kinase
MT1062	35.355	50.6249	20.524	41.3794	-0.531813353611129	5.21359	5.56789	0.0182928007646554	0.0583109	Rv1033c	TrcR	two-component response regulator
MT1065	28.336	29.3578	78.646	71.4846	1.37736	5.70192	45.6348	1.42488094676004e-11	4.36781e-10	Rv1035c	Rv1035c	probable transposase
MT1066	379.026	317.018	363.76	274.603	-0.133217454398237	8.38245	0.580007286738748	0.446309464777332	0.612651	Rv1037c	esxI	ESAT-6 like protein
MT1067	88.1925	86.3629	88.3525	66.0608	-0.191819933760564	6.36385	0.994444416820173	0.318658540909758	0.490102	Rv1038c	esxJ	ESAT-6 like protein
MT1068	4.74433	8.09074	33.0956	23.0969	2.13506	4.1175	41.0355	1.49492246496255e-10	3.97151e-09	Rv1039c	PPE15	PPE-family protein
MT1069	4.02943	7.67465	5.55492	6.88641	0.133154610333151	2.62555	0.190160779900973	0.662782835497589	0.787005	Rv1040c	PE8	PE-family protein
MT1070	8.31882	7.44348	8.12773	7.25206	-0.0355299495072822	2.98102	0.0163378848046051	0.898291631437353	0.941297
MT1070.1	22.7468	19.8339	20.2316	20.4764	-0.0611067367758037	4.38751	0.0616837923388154	0.803854161987934	0.879319
MT1073	70.515	98.3372	80.6925	122.554	0.256710654646751	6.54141	2.04302	0.152906268326637	0.292202	Rv1043c	Rv1043c	possible HtrA like protease
MT1074	26.9062	73.6027	32.394	90.2547	0.281495766004491	5.80558	2.07097	0.150126406173645	0.288732	Rv1044	Rv1044	conserved hypothetical protein
MT1075	52.0576	62.6455	43.2699	64.842	-0.106591325408755	5.80283	0.284926688969882	0.593490122552704	0.733351	Rv1045	Rv1045	hypothetical protein
MT1075.1	364.988	351.878	371.303	399.961	0.104832266766379	8.53971	0.358462621428501	0.549361298331653	0.697866	Rv1046c	Rv1046c	hypothetical protein
MT1076	2.8596	2.21918	3.27448	2.86426	0.280429495295605	1.53998	0.755284	0.384808346295546	0.556083	Rv1047	Rv1047	probable transposase
MT1077	4.67934	8.50684	5.90576	5.18005	-0.20663	2.63454	0.394988411625203	0.529689	0.681921
MT1078	50.7578	108.231	60.1686	142.604	0.323234	6.501	3.04724	0.0808744324738098	0.184166	Rv1048c	Rv1048c	hypothetical protein
MT1079	23.5267	36.94	45.4919	50.216	0.692895161450305	5.29142	9.37056	0.00220498466309705	0.0108808	Rv1049	Rv1049	transcriptional regulator (MarR family)
MT1080	11.8933	13.7311	13.975	13.5291	0.103916159453417	3.7442	0.154373849298469	0.694390108812175	0.809107	Rv1050	Rv1050	probable oxidoreductaseoxidoreducatse
MT1082	25.7364	31.2996	27.7746	31.324	0.0548526883705401	4.86564	0.0592831307714407	0.807632589908467	0.882725
MT1083	49.653	61.5821	82.2713	97.8115	0.697625134315576	6.18863	14.3161	0.000154534092884106	0.00115322	Rv1052	Rv1052	hypothetical protein
MT1083.1	134.791	151.644	154.836	170.942	0.186359510425338	7.25897	1.22884	0.267632897233849	0.433544
MT1083.2	73.5696	101.851	108.935	100.737	0.273823386575212	6.59092	1.85538	0.173159048116668	0.318137
MT1084	81.1735	57.3749	72.1555	57.6509	-0.0818169214965367	6.07014	0.193223021279416	0.660247554005967	0.786573	Rv1054	Rv1054	Probable integrase fragment
MT1085	93.9767	77.9023	114.724	114.388	0.421113	6.64887	5.24563	0.0220019662128658	0.0667767	Rv1056	Rv1056	conserved protein
MT1086	12.0883	13.1764	7.71842	9.38502	-0.566344028042092	3.42172	4.37138	0.0365473	0.0990756
MT1087	375.712	552.621	410.947	466.143	-0.0583892046105388	8.81854	0.101595420570789	0.749923402662805	0.843241	Rv1057	Rv1057	B-propeller gene
MT1088	188.408	183.082	141.387	150.526	-0.348207039282125	7.37476	4.23402	0.0396214817178966	0.106039	Rv1058	fadD14	medium chain fatty acid CoA ligase
MT1089	138.495	137.866	112.326	118.714	-0.258832009875218	6.98831	2.34192	0.125934597658513	0.252821	Rv1059	Rv1059	conserved hypothetical protein
MT1090	64.6009	75.1283	77.8274	66.4874	0.0455502213409322	6.15242	0.052934714630851	0.818033	0.889242	Rv1060	Rv1060	hypothetical protein
MT1091	99.371	77.5787	102.971	95.4347	0.175056770221874	6.55366	0.922171664481539	0.336905409436576	0.506821	Rv1061	Rv1061	conserved protein
MT1092	31.6505	20.5736	32.0431	25.4736	0.161885898432293	4.78293	0.483153	0.486997	0.648191	Rv1062	Rv1062	conserved hypothetical protein
MT1093	95.0816	183.174	150.626	315.617	0.725021932447173	7.54105	18.6338	1.58389159735281e-05	0.000154701	Rv1063c	Rv1063c	conserved hypothetical protein
MT1094	12.2183	16.1353	22.6875	23.1579	0.703168862141824	4.22211	7.7145	0.00547789405009421	0.0225744	Rv1064c	lpqV	lipoprotein
MT1095	285.765	291.359	313.765	268.083	0.00730734767272235	8.1792	0.00176772907769873	0.966463326949453	0.981037	Rv1065	Rv1065	conserved hypothetical protein
MT1096	32.1705	47.8972	65.0803	41.806	0.407929777352549	5.55042	2.20821	0.137277815356156	0.270684	Rv1066	Rv1066	conserved hypothetical protein
MT1096.1	10.7235	13.1301	14.2089	9.87256	-0.00390631182203316	3.59784	0.000179937936245267	0.989297421920482	0.994561	Rv1067c	PE_PGRS19	PE_PGRS-family protein
MT1097	17.4175	14.4246	12.5132	8.04431	-0.656345	3.72396	5.91559	0.0150074771493776	0.0497288	Rv1068c	PE_PGRS20	PE_PGRS-family protein
MT1099	222.789	144.293	152.322	113.108	-0.450236260994987	7.30584	7.07271	0.00782667070643623	0.0297608	Rv1069c	Rv1069c	conserved hypothetical protein
MT1100	210.83	135.878	150.801	110.183	-0.393224794474315	7.24813	5.27547	0.0216279152113088	0.0659428	Rv1070c	echA8	enoyl-CoA hydratase/isomerase superfamily
MT1101	171.836	138.837	120.454	97.3239	-0.512508744818737	7.04683	9.27842	0.00231869741796498	0.0112811	Rv1071c	echA9	enoyl-CoA hydratase/isomerase superfamily
MT1102	2184.21	3444.11	3529.48	4927.08	0.604418635741188	11.7819	19.1026	1.23875885899638e-05	0.00012561	Rv1072	Rv1072	probable transmembrane protein
MT1103	436.543	519.333	655.422	746.049	0.554409930894854	9.20322	10.2146	0.00139334122287046	0.00743302	Rv1073	Rv1073	conserved hypothetical protein
MT1104	912.536	811.941	868.322	898.403	0.0371916526904502	9.76968	0.0479764256624549	0.826622615696229	0.893915	Rv1074c	fadA3	acetyl-CoA C-acetyltransferase
MT1105	89.8823	183.637	248.744	330.974	1.15687	7.73759	35.3738	2.7212442444306e-09	6.23227e-08	Rv1075c	Rv1075c	conserved exportedprotein
MT1106	93.6518	173.604	197.989	235.601	0.758164635286899	7.45397	15.2245	9.54548837580071e-05	0.000751754	Rv1076	lipU	Possible lipase
MT1108	354.655	379.387	316.747	388.503	-0.0642618153187799	8.49161	0.134081558947344	0.714237115902834	0.820241	Rv1077	cbs	cystathionine [beta]-synthase
MT1109	664.986	648.6	480.413	486.437	-0.442046773316422	9.15539	6.5447	0.0105197326946084	0.037972	Rv1078	pra	MLPRAG (64.8% id) proline rich Ag
MT1110	535.134	397.094	371.712	291.423	-0.486062848540259	8.64005	7.76284	0.00533321454378231	0.0220924	Rv1079	metB	cystathionine [gamma]-synthase
MT1111	578.418	325.618	498.013	412.819	0.0629608518256384	8.82593	0.105908872981672	0.744851	0.840346	Rv1080c	greA	transcription elongation factor G
MT1112	43.9988	64.726	59.2915	54.2381	0.0853510767222532	5.79944	0.148906168239222	0.699582862169386	0.811718	Rv1081c	Rv1081c	possible conserved membrane protein
MT1113	217.459	305.969	245.82	374.304	0.234061615258468	8.15992	1.87317	0.171112734671025	0.315736	Rv1082	mca	mycothiol conjugate amidase
MT1114	61.7413	53.2602	49.1757	58.3212	-0.0977269659490363	5.80042	0.224105635950565	0.635929279426777	0.7677	Rv1083	Rv1083	conserved hypothetical protein
MT1115	126.342	187.752	133.727	186.725	0.0367082851146088	7.31075	0.0480807041641533	0.826437294182494	0.893915	Rv1084	Rv1084	conserved hypothetical protein
MT1116	2.7946	4.06849	3.50837	3.53462	0.046964010889911	1.84891	0.0222510204723658	0.881421259525481	0.931688
MT1117	133.751	114.704	122.735	107.196	-0.110827232546439	6.90334	0.408432265720297	0.522766299726657	0.677471	Rv1085c	Rv1085c	hemolysinlike protein
MT1118	205.371	287.013	281.547	423.24	0.507939622305816	8.22597	8.62405	0.00331752663235975	0.0152308	Rv1086	Rv1086	E,Z-farnesyl diphosphate synthase
MT1119	2.98958	6.3339	3.56684	3.71744	-0.291000555637494	2.10385	0.755112659336655	0.384862344438715	0.556083	Rv1088	PE9	PE-family protein
MT1121	8.25383	4.16095	4.61936	3.59556	-0.536798386618029	2.39194	3.03962	0.0812549409101708	0.184712
MT1122	22.7468	15.7654	13.2733	11.6399	-0.608336382678005	3.99634	5.39718	0.0201692739942593	0.0626947	Rv1090	celA2b	probable cellulase
MT1123	16.2477	70.1814	43.6792	45.2188	0.383309130708607	5.45945	0.981834629599803	0.321746285028496	0.493328	Rv1091	PE_PGRS22	PE_PGRS-family protein
MT1124	164.232	129.452	111.625	112.377	-0.380494375119151	7.01712	4.58937	0.0321708151141771	0.0894632	Rv1092c	coaA	pantothenate kinase
MT1125	725.167	800.937	781.256	852.697	0.0989051902722779	9.62595	0.348798721723284	0.554793933496779	0.702304	Rv1093	glyA1	serine hydroxymethyltransferase
MT1126	1563.42	3287.34	614.608	751.29	-1.73842	10.6021	73.4773	1.0180095992642e-17	5.07096e-16	Rv1094	desA2	acyl-[ACP] desaturase
MT1127	657.967	847.124	719.567	804.492	0.0272181130165808	9.56493	0.0253808073140362	0.873421845496401	0.926589	Rv1095	phoH2	PhoH-like protein
MT1128	423.61	323.953	463.28	424.764	0.259991299408175	8.67596	2.13721	0.143763526086962	0.279462	Rv1096	Rv1096	Possible glycosyl hydrolase
MT1129	357.449	170.414	227.05	145.651	-0.441504867724613	7.81522	6.14084	0.0132094283495484	0.0453399	Rv1097c	Rv1097c	probable membrane glycin and proline rich protein
MT1130	371.747	222.796	307.801	204.642	-0.197656	8.11291	1.34552	0.246062452200588	0.406871	Rv1098c	fum	fumarase
MT1131	145.514	176.055	186.002	163.263	0.122192372284273	7.39085	0.457160696201498	0.498954	0.658824	Rv1099c	glpX	fructose 1,6-bisphospahatase
MT1132	100.086	164.173	116.887	162.471	0.103366535120374	7.08785	0.364802026383199	0.545851332924227	0.695402	Rv1100	Rv1100	conserved hypothetical protein
MT1133	342.437	390.945	316.455	486.742	0.101601820400353	8.58594	0.298632277727506	0.584741132890182	0.726143	Rv1101c	Rv1101c	conserved membrane protein
MT1134	172.356	244.109	221.671	425.495	0.583380079581905	8.05539	10.2528	0.0013647992985539	0.00731995	Rv1102c	mazF3	toxin
MT1135	193.088	397.464	275.933	672.492	0.637553706143216	8.58821	12.7927	0.000347976596548272	0.00229965	Rv1103c	mazE3	antitoxin
MT1137	170.146	143.969	127.529	108.964	-0.408910708267084	7.10605	6.0199	0.0141454669722992	0.0476498	Rv1106c	Rv1106c	probable cholesterol dehydrogenase
MT1138	59.2066	59.4092	47.0122	39.8559	-0.454299938616571	5.68627	5.07505	0.0242725364926913	0.0721836	Rv1107c	xseB	exonuclease VII small subunit
MT1139	186.589	166.115	139.575	137.485	-0.345789451792344	7.29969	4.2277	0.0397693273470689	0.106292	Rv1108c	xseA	exonuclease VII large subunit
MT1140	469.429	381.097	343.47	395.085	-0.199225879724837	8.63436	1.08842	0.296822261332141	0.4655	Rv1109c	Rv1109c	hypothetical protein
MT1141	287.194	377.167	442.698	494.603	0.507451192153006	8.64577	8.17486	0.00424750405794612	0.0183276	Rv1110	lytB2	very similar to LytB
MT1142	430.434	347.856	340.37	337.434	-0.191257793362329	8.50831	1.14314	0.284990612307195	0.451867	Rv1111c	Rv1111c	hypothetical protein
MT1143	55.0472	66.2054	58.5313	57.7118	-0.0556064754372313	5.89474	0.0818407	0.774818234931787	0.862472	Rv1112	Rv1112	probable GTP binding protein
MT1143.1	16.7676	20.25	19.0037	15.1745	-0.119241281984344	4.1638	0.201522923551749	0.653494	0.780628	Rv1113	VapB32	possible anti toxin
MT1144	16.3777	14.0085	16.4309	9.62879	-0.263978710758148	3.83019	0.938065053657444	0.332775957622848	0.504225	Rv1114	vapC32	possible toxin
MT1145	33.3403	21.2671	20.8163	12.3712	-0.729296584594469	4.46268	8.83703	0.00295178835181319	0.0138062	Rv1115	Rv1115	possible exported proten
MT1147	10.8535	6.10273	6.49049	4.69251	-0.566240007373656	2.83388	3.82108	0.0506116004439571	0.127408	Rv1116	Rv1116	hypothetical protein
MT1148	72.0748	54.8321	48.357	36.8697	-0.574104658615226	5.73176	8.38546	0.00378235055527104	0.0167847	Rv1116A	Rv1116A	conserved hypothetical protein
MT1149	291.744	272.358	246.405	232.858	-0.234850083057991	8.02766	1.9587	0.161653	0.303934	Rv1117	Rv1117	conserved hypothetical protein
MT1150	61.0914	50.0702	74.8452	64.781	0.332231937594189	5.97266	3.18156	0.0744737046225055	0.172746	Rv1118c	Rv1118c	hypothetical protein
MT1153	348.546	338.517	218.513	287.584	-0.45407	8.22113	6.02056	0.0141401357531479	0.0476498	Rv1121	zwf1	glucose-6-phosphate 1-dehydrogenase
MT1154	95.2765	149.24	98.3513	108.842	-0.206246680575819	6.82102	1.17165	0.279062037300787	0.445359	Rv1122	gnd2	6-phosphogluconate dehydrogenase (Gram +)
MT1155	103.66	104.949	80.5756	85.5012	-0.329421625363616	6.55136	3.3829	0.0658759410935853	0.156913	Rv1123c	bpoB	probable non-heme bromoperoxidase
MT1156	58.9467	84.6985	77.8858	90.8641	0.250230886357541	6.28952	1.76382	0.184148349137468	0.333257	Rv1124	ephC	probable epoxide hydrolase
MT1157.1	6.56407	7.81335	6.25659	6.09417	-0.216656479635723	2.76676	0.561620492601295	0.453608057398148	0.617324	Rv1125	Rv1125	conserved hypothetical protein
MT1158	76.5592	72.4931	90.6914	85.6841	0.242762083428223	6.34811	1.76293	0.184258889999253	0.333273	Rv1126c	Rv1126c	conserved protein
MT1159	264.253	283.176	300.55	364.492	0.275101766634034	8.24426	2.49673	0.114083	0.236412	Rv1127c	ppdK	similar to pyruvate, phosphate dikinase
MT1160	111.199	112.808	86.189	97.5068	-0.288620367556013	6.67304	2.61858	0.105619052888501	0.22376	Rv1128c	Rv1128c	hypothetical protein
MT1161	128.162	134.353	27.4822	28.4598	-2.22994	6.31755	132.293	1.29085450675558e-30	1.51296e-28	Rv1129c	PrpR	probable PrpCD transcriptional regulator (PbsX/Xre family)
MT1162	769.361	978.934	161.97	130.232	-2.57868	8.99516	144.653	2.55705387711345e-33	3.39662e-31	Rv1130	prpD	methyl citrate dehydratase
MT1163	624.302	678.698	119.928	83.1854	-2.70326	8.55719	160.737	7.81144466741873e-37	1.24514e-34	Rv1131	prpC	methylcitrate synthase
MT1164	390.725	293.347	220.677	200.864	-0.685355298201356	8.11119	15.3373	8.99225565675129e-05	0.000712408	Rv1132	Rv1132	conserved membrane protein
MT1165	2341.36	2074.37	3005.39	2576.31	0.336415815175254	11.2874	5.23245	0.0221692939126403	0.0670802	Rv1133c	metE	5-methyltetrahydropteroyltriglutamate-homocystei ne
MT1167	2.92459	2.9589	3.80074	2.68144	0.118703310529245	1.68043	0.136193652093606	0.712094748758583	0.81896	Rv1134	Rv1134	hypothetical protein
MT1168	29.7008	52.8904	45.6673	47.5955	0.229523358177231	5.46265	0.922630261578703	0.336785297913091	0.506821	Rv1135c	PPE16	PPE-family protein
MT1169.1	18.3924	8.64554	7.19216	7.61771	-0.773568268382536	3.39875	5.64757	0.0174795798357602	0.0563561	Rv1136	Rv1136	Possible enoyl-CoA Hydratase
MT1171	54.3323	47.851	53.795	54.1772	0.082627595873624	5.71824	0.171163342222407	0.679079971517617	0.795922	Rv1138c	Rv1138c	Possible oxidoreductase
MT1172	28.8559	37.125	34.2651	36.6869	0.113855028406719	5.10248	0.266844077452984	0.605456691725667	0.743419	Rv1139c	Rv1139c	conserved hypothetical membrane protein
MT1172.1	8.31882	6.10273	6.37354	4.57063	-0.399811176146301	2.68872	1.91135	0.166813605598006	0.310342
MT1173	455.521	465.934	413.345	465.778	-0.0702617650213971	8.81461	0.161269217218642	0.687990657739206	0.80353	Rv1140	Rv1140	probable integral membrane protein
MT1174	129.137	116.091	108.409	102.687	-0.214664092849679	6.83532	1.51421	0.218497370404206	0.3745	Rv1141c	echA11	enoyl-CoA hydratase/isomerase superfamily
MT1175	143.955	247.253	201.673	265.157	0.292572266670632	7.74577	2.74243	0.0977158155969452	0.211285	Rv1142c	echA10	enoyl-CoA hydratase/isomerase superfamily
MT1176	130.697	121.454	143.609	147.906	0.210239366820363	7.08771	1.55483	0.212423	0.368367	Rv1143	mcr	[alpha]-methyl acyl-CoA racemase
MT1177	73.0497	65.1421	99.9301	80.1384	0.375433909293836	6.31597	4.14498	0.0417580419129701	0.110037	Rv1144	Rv1144	probable short-chain typel dehydrogenase
MT1178	764.227	1976.27	122.968	431.589	-2.41394	9.68645	161.679	4.86249815325782e-37	8.07377e-35
MT1180	13.6481	11.512	12.2208	12.1274	-0.0416560887811443	3.64198	0.0249388642241968	0.874519494234289	0.926589	Rv1147	Rv1147	hypothetical protein
MT1181	2.72961	4.06849	3.91768	4.0831	0.245974351199955	1.93474	0.623693305531992	0.429678	0.597526
MT1182	154.223	149.609	127.471	128.587	-0.246591	7.13019	2.15676	0.141943354929744	0.277642
MT1183	184.054	293.347	217.987	364.249	0.27839	8.05004	2.7181	0.0992157899712339	0.213947	Rv1148c	Rv1148c	conserved hypothetical protein
MT1185	87.0877	99.1694	128.231	122.371	0.430220631390909	6.77251	5.83002	0.0157549772905494	0.0516312	Rv1151c	Rv1151c	NAD-dependent protein deacetylase Sir2 family
MT1186	61.5463	169.49	169.103	303.977	1.14634	7.46068	34.9665	3.35435003114244e-09	7.40936e-08	Rv1152	Rv1152	transcriptional regulator (GntR family)
MT1187	77.4041	63.8475	64.671	67.1578	-0.0929072896396538	6.09541	0.238206962309228	0.625504150873351	0.759718	Rv1153c	omt	PKS o-methyltransferase
MT1188	35.55	41.1934	40.7556	52.7146	0.277333271663419	5.41506	1.72101	0.189563019515903	0.339662	Rv1154c	Rv1154c	hypothetical protein
MT1189	143.825	157.053	164.25	185.019	0.214071260867949	7.34563	1.6386	0.200518195822555	0.352632	Rv1155	Rv1155	Possible pyridoxamine 5'-phosphate oxidase
MT1190	28.6609	51.8732	43.5623	46.6814	0.221029798667849	5.42055	0.844740026887862	0.358044630167934	0.527964
MT1191	345.946	474.672	388.786	693.334	0.357967151593444	8.89421	3.77767	0.0519408675056822	0.129771	Rv1156	Rv1156	conserved protein
MT1192	83.7082	120.113	109.987	175.147	0.469749818637376	6.93494	7.25517	0.00706969985841093	0.0275286
MT1193	76.6892	97.2739	91.4515	85.1965	0.0304651178090779	6.45577	0.0241114902199513	0.876601567408793	0.927748	Rv1157c	Rv1157c	Conserved ala-, pro-rich protein
MT1194	60.3115	75.4057	67.1853	69.5954	0.0190959382669743	6.09271	0.0103058350333782	0.919139540337762	0.952184	Rv1158c	Rv1158c	Conserved hypothetical ala-, pro-rich protein
MT1195	64.016	48.4982	56.0755	49.5456	-0.0802944887903593	5.77178	0.164238660300768	0.685284	0.801307	Rv1159	pimE	mannosyltransferase
MT1196	130.697	186.919	175.945	291.119	0.534749462442052	7.61681	10.0558	0.00151870267816835	0.00795617	Rv1159A	Rv1159A	hypothetical protein
MT1197	55.4372	50.6249	50.5205	39.4902	-0.245943182806951	5.61858	1.54543	0.213811954027197	0.369945	Rv1160	mutT2	MutT homologue
MT1198	2187.53	2296.52	2261.32	2488.8	0.0819405168512318	11.1728	0.301673042289622	0.582835469660263	0.725132	Rv1161	narG	nitrate reductase [alpha] subunit
MT1199	578.158	488.866	527.659	438.049	-0.145097955085214	8.98951	0.692626753744619	0.405272358908257	0.573716	Rv1162	narH	nitrate reductase [beta] chain
MT1200	113.474	116.276	117.881	97.7505	-0.0978092643738746	6.80041	0.294214049115055	0.587532637877041	0.728248	Rv1163	narJ	nitrate reductase [delta] chain
MT1201	136.806	89.4605	90.516	65.7561	-0.520353892257214	6.58096	8.2087	0.00416901210612067	0.0180665	Rv1164	narI	nitrate reductase [gamma] chain
MT1202	193.608	149.008	149.281	121.64	-0.333989379024407	7.262	3.91683	0.0478050213376205	0.122039	Rv1165	typA	possible GTP bindng ttranslation elongation factor
MT1203	350.82	266.578	272.367	234.991	-0.273614682307609	8.13593	2.54573	0.110592636818861	0.231223	Rv1166	lpqW	lipoprotein
MT1204	185.939	187.428	176.588	171.429	-0.101618112364376	7.49555	0.374966	0.540309667024828	0.69057	Rv1167c	Rv1167c	probable transcriptional factor
MT1205	402.813	325.202	260.029	230.116	-0.565216939855712	8.25101	10.5985	0.00113177869455161	0.00623809	Rv1168c	PPE17	PPE-family protein
MT1206	120.818	132.873	76.1316	84.5262	-0.659348774747408	6.69648	13.9635	0.000186395999085765	0.00135052	Rv1169c	lipX	possible lipase/ PE-family protein
MT1207	202.511	159.549	178.459	131.147	-0.232506092866882	7.39252	1.95369	0.162189539855658	0.30401	Rv1170	mshB	mycothiol biosynthesis
MT1208	294.798	339.719	267.864	267.412	-0.241879	8.19265	1.94559	0.163063082579045	0.30493	Rv1171	Rv1171	conserved hypothetical protein
MT1209	394.494	289.88	218.045	240.598	-0.562007015091899	8.15916	8.44456	0.00366136891267334	0.0163571	Rv1172c	PE12	PE-family protein
MT1210	677.919	662.147	648.288	618.376	-0.0815766024200321	9.34828	0.224333832532935	0.635757411988147	0.7677	Rv1173	fbiC	probable F420 biosynthesis protein
MT1211	1682.03	1852.73	2405.69	2307.5	0.416434030097596	11.0099	7.23554	0.00714744292424771	0.0277068	Rv1174c	TB8.4	T cell antigen
MT1212	662.516	396.03	467.315	329.024	-0.385637	8.85741	4.70269	0.0301153884416864	0.0848126	Rv1175c	fadH	2,4-Dienoyl-CoA Reductase
MT1213	146.944	119.327	107.415	115.911	-0.246738339415102	6.9367	1.80341	0.179300242249337	0.326261	Rv1176c	Rv1176c	conserved hypothetical protein
MT1214	532.99	1213.06	454.802	732.154	-0.479127144078754	9.51848	6.48988	0.0108490430292281	0.0389298	Rv1177	fdxC	ferredoxin 4Fe-4S
MT1215	416.851	817.258	344.697	491.373	-0.504567167776232	9.01597	7.06617	0.00785530531613876	0.0298309	Rv1178	Rv1178	possible aminotransferase
MT1216	45.7535	44.0599	73.8512	53.9944	0.491890052600219	5.76876	5.74581	0.0165280770980411	0.0537668
MT1217	325.344	221.825	357.328	253.396	0.163577144932838	8.17777	0.929424	0.335013	0.505707	Rv1179c	Rv1179c	hypothetical protein
MT1218	2518.39	2198.46	4868.92	3449.73	0.800537834177715	11.6702	30.1962	3.90481919776975e-08	6.76552e-07	Rv1180/Rv1181	pks3/pks4	polyketide synthase
MT1219	1135.32	599.085	1716	1041.37	0.696711035261267	10.1332	17.2837	3.21931311950179e-05	0.000289593	Rv1182	papA3	PKS-associated protein, unknown function
MT1220	721.268	373.145	963.75	535.8	0.469954715978156	9.34113	7.34376	0.00672958412868853	0.0264732	Rv1183	mmpL10	conserved large membrane protein
MT1221	628.786	458.722	914.691	680.536	0.554871195922238	9.3897	10.3013	0.00132938844567939	0.00718808	Rv1184c	Rv1184c	Acyltransferase chp2 homologue
MT1222	1412.58	1000.06	1461.35	1063.07	0.0685530164303854	10.2696	0.179561170581707	0.671750635103184	0.791982	Rv1185c	fadD21	acyl-CoA synthase
MT1223	66.8755	82.803	77.7104	82.3323	0.103470595698586	6.27708	0.309873917251505	0.577757565050763	0.720164	Rv1186c	Rv1186c	hypothetical protein
MT1224	137.651	265.191	423.928	735.567	1.54683	8.60987	73.927	8.10619767323586e-18	4.08901e-16	Rv1187	rocA	pyrroline-5-carboxylate dehydrogenase
MT1225	29.1159	74.8047	128.582	212.565	1.81729	6.79926	77.6301	1.24264884366958e-18	6.7835e-17	Rv1188	Rv1188	probable proline dehydrogenase
MT1226	53.8124	53.0753	80.4002	110	0.816878114172867	6.21764	17.073	3.59701279801306e-05	0.000316342	Rv1189	SigI	sigma factor
MT1227	26.1263	28.988	59.9931	74.5317	1.28174	5.57008	39.6882	2.97925482951588e-10	7.61047e-09	Rv1190	Rv1190	conserved hypothetical protein
MT1228	127.187	81.5085	98.7022	87.817	-0.129640845414431	6.62788	0.449066482282362	0.502778600699511	0.660373	Rv1191	Rv1191	conserved protein
MT1229	1037.77	1490.92	1203.84	1298.06	0.00703327169326917	10.2967	0.00163969492814431	0.967699970718242	0.981243	Rv1192	Rv1192	hypothetical protein
MT1230	270.752	342.909	391.71	330.67	0.239903874742512	8.38427	1.49861	0.220885500857137	0.377457	Rv1193	fadD36	acyl-CoA synthase
MT1231	1432.98	1520.18	1696.53	1838.43	0.258902568580079	10.6637	2.76161	0.0965510366935754	0.208993	Rv1194c	Rv1194c	conserved hypothetical protein
MT1232	62.1962	81.6472	100.047	76.36	0.293441696086334	6.32526	1.78699	0.181293389130867	0.328837
MT1233	677.269	698.902	214.42	176.487	-1.82225	8.7876	95.1904	1.72924898988847e-22	1.11146e-20	Rv1195	PE13	PE-family protein
MT1234	834.092	943.982	357.269	233.59	-1.61863	9.21037	55.6763	8.54427911653359e-14	3.12376e-12	Rv1196	PPE18	PPE-family protein
MT1235	193.153	175.87	113.671	82.2713	-0.929985619220569	7.14326	27.483	1.58480371957387e-07	2.42902e-06	Rv1197	esxK	ESAT-6 like protein
MT1236	182.754	132.642	110.221	81.2963	-0.717891048988027	6.98681	17.9272	2.29513911078606e-05	0.000213196	Rv1198	esxL	ESAT-6 like protein
MT1237	14.7529	15.2568	17.191	16.4543	0.164281251438305	4.0024	0.412933443496481	0.520484347935017	0.675392	Rv1199c	Rv1199c	possible transposase
MT1238	173.915	110.913	208.748	138.947	0.294114206322648	7.30583	3.11425	0.0776101964962244	0.17898	Rv1200	Rv1200	probable conserved integral membrane transport protein
MT1239	504.719	502.366	548.826	615.877	0.207447623107216	9.08496	1.37071	0.241689876110383	0.402452	Rv1201c	dapD	tetrahydrodipicolinate N-succinyltransferase
MT1240	210.245	200.512	214.771	233.407	0.125093194984581	7.74714	0.550050845654354	0.458296919372759	0.621195	Rv1202	dapE	succinyl-diaminopimelate desuccinylase
MT1241	21.6419	18.8168	18.4189	15.662	-0.248573760222675	4.2285	1.03458	0.309086272376448	0.478148	Rv1203c	Rv1203c	hypothetical protein
MT1242	160.202	158.717	145.305	134.559	-0.189561500243729	7.22701	1.26577	0.260562106964499	0.424505	Rv1204c	Rv1204c	conserved hypothetical protein
MT1243	61.1564	103.469	88.7033	94.3378	0.199069884761621	6.44377	0.897704906407427	0.343397856387468	0.513415	Rv1205	Rv1205	conserved hypothetical protein/ homolog of plant enzyme LONELY GUY catalyzes production of cytokinins
MT1244	237.736	192.837	264.414	214.271	0.152741283953983	7.8292	0.861241645502321	0.353391459073028	0.523324	Rv1206	fadD6	acyl-CoA synthase
MT1245	133.946	152.799	169.22	178.498	0.280552	7.31044	2.78934	0.0948930833201228	0.206301	Rv1207	folP2	dihydropteroate synthase
MT1246	167.676	176.008	202.024	193.063	0.201003786143463	7.52987	1.46421	0.226261	0.383461	Rv1208	gpgS	probable glucosyl-3-phosphoglycerate synthase
MT1247	62.0012	107.306	114.958	129.44	0.577943395379473	6.69421	8.28242	0.00400307106490564	0.0175685	Rv1209	Rv1209	conserved hypothetical protein
MT1248	96.9663	109.895	105.543	123.102	0.143105267840133	6.76809	0.678818251912912	0.409993952029925	0.57855	Rv1210	tagA	DNA-3-methyladenine glycosidase I
MT1249	774.626	973.109	900.248	1008.89	0.134396428363237	9.83659	0.641172756470837	0.423286443889541	0.591029	Rv1211	Rv1211	possible calmodulin like small protein
MT1250	93.2618	61.166	67.1853	58.9916	-0.263297693989965	6.13439	1.81964	0.177355684880612	0.323757	Rv1212c	glgA	putative glycosyl transferase
MT1251	195.362	263.203	186.47	308.243	0.0810528433139808	7.89749	0.222918767270471	0.636824907102734	0.768549	Rv1213	glgC	glucose-1-phosphate adenylyltransferase
MT1252	51.2778	44.7996	45.141	44.8531	-0.0908719122597422	5.54307	0.202609945118908	0.652622370105504	0.780257	Rv1214c	PE14	PE-family protein
MT1253	212.78	242.676	200.854	218.964	-0.115851712396054	7.77439	0.484658334664104	0.486319824814536	0.647506	Rv1215c	Rv1215c	conserved hypothetical protein
MT1254	103.79	139.762	89.288	146.382	-0.0739346031598383	6.90606	0.171664221519649	0.678636976971651	0.795922	Rv1216c	Rv1216c	probable conserved integral membrane protein
MT1255	131.086	299.635	146.007	319.944	0.124741	7.80935	0.566868218569702	0.451506093572075	0.615208	Rv1217c	Rv1217c	Probable tetronasin-transport integral membrane protein ABC transporter
MT1256	72.5297	120.067	63.56	131.878	-0.0251716122997207	6.60199	0.0182322615429342	0.892590612353625	0.938268	Rv1218c	Rv1218c	Probable tetronasin-transport ATP-binding protein ABC transporter
MT1257	49.848	95.3321	50.1697	99.0912	0.0330232118807829	6.20452	0.0320730257560369	0.857867477484989	0.915779	Rv1219c	Rv1219c	Regulator of Antimicrobial-Assisted Survival),
MT1258	65.1858	150.627	84.6102	104.454	-0.0796446625338999	6.66353	0.124072214988871	0.724659135458347	0.828581	Rv1220c	Rv1220c	probable methyltransferase
MT1259	1345.89	2619.97	5111.75	8421.54	1.80477	12.095	168.646	1.46151140006568e-38	2.91206e-36	Rv1221	sigE	ECF subfamily sigma subunit
MT1260	317.22	481.422	907.908	1441.33	1.54961	9.62035	81.4863	1.76477318475882e-19	1.03421e-17	Rv1222	rseA	Anti sigma factor RseA
MT1261	785.869	901.818	1047.77	1344.07	0.495394	9.99434	8.7601	0.00307892815797548	0.0143002	Rv1223	htrA	serine protease
MT1262	149.674	135.092	176.179	193.368	0.376555559395798	7.35475	4.65391	0.0309829137977423	0.0868454	Rv1224	tatB	involved in protein export
MT1263	31.7155	52.8441	53.0349	63.2575	0.496833582918878	5.65358	5.54003	0.0185862735630483	0.059017	Rv1225c	Rv1225c	conserved hypothetical protein
MT1264	33.0803	80.214	53.6196	92.9361	0.448784480732312	6.0246	5.01079	0.0251897519308564	0.0740163	Rv1226c	Rv1226c	probable transmembrane protein
MT1265	27.946	33.9349	33.8558	31.7506	0.0888663326245479	4.99968	0.158201064946716	0.690818181601081	0.805943	Rv1228	LpqX	probable lipoprotein
MT1266	5.52422	4.90068	7.65994	6.03323	0.385383826202885	2.61716	1.72932	0.188497860939894	0.338515
MT1267	504.069	512.999	540.581	599.545	0.162946677641273	9.07524	0.860233923144904	0.353673238138648	0.523547	Rv1229c	mrp	similar to MRP/NBP35 ATP-binding proteins
MT1268	65.9657	72.1694	65.782	54.36	-0.206719046768419	6.01549	1.11566	0.290854422811182	0.458306	Rv1230c	Rv1230c	possible membrane protein
MT1269	59.9865	49.7928	49.1757	50.5816	-0.131720721716117	5.71398	0.420020619081425	0.516926755924104	0.672089	Rv1231c	Rv1231c	Probable membrane protein
MT1270	243.976	199.911	172.846	209.274	-0.215254816024166	7.69074	1.32239	0.250163520431388	0.411263	Rv1232c	Rv1232c	hypothetical protein
MT1271	406.193	353.265	247.808	246.753	-0.615267338551141	8.29287	12.2273	0.000470945719642858	0.0029742	Rv1233c	Rv1233c	hypothetical protein
MT1272	148.374	169.721	151.737	178.864	0.0540999927456037	7.34244	0.104644535093819	0.746325636749692	0.840381	Rv1234	Rv1234	probable transmembrane protein
MT1273	167.806	178.644	180.447	224.083	0.216220963322691	7.55349	1.63534	0.200965787532191	0.353108	Rv1235	lpqY	possible role in sugar transport
MT1274	80.5886	67.4999	65.9574	64.0497	-0.182258770999209	6.12167	0.965309	0.325853	0.497328	Rv1236	sugA	membrane protein probably involved in sugar
MT1275	95.5365	67.1763	58.8822	53.324	-0.516049904302037	6.10501	7.19736	0.00730108409920195	0.0281654	Rv1237	sugB	probable sugar transport integral membrane protein ABC tarnsporter
MT1276	300.648	223.674	205.357	181.606	-0.425343886342013	7.83242	6.31724	0.0119569645740989	0.0417855	Rv1238	sugC	ABC transporter component of sugar uptake system
MT1277	253.854	238.515	388.377	385.395	0.652879924154618	8.30669	14.1267	0.000170901020582119	0.00126119	Rv1239c	corA	possible magnesium and cobalt tarnsort transmembrane protein
MT1278	643.409	566.398	520.584	469.495	-0.288152189483799	9.10351	2.76915	0.0960973194564644	0.208237	Rv1240	mdh	malate dehydrogenase
MT1279	171.446	97.5975	96.3048	65.4514	-0.705072026864496	6.75212	15.4178	8.61749704604127e-05	0.000688191	Rv1241	vapB33	possible anti toxin
MT1280	115.164	49.8852	73.3834	42.2936	-0.446977062588179	6.13467	5.23464	0.0221414321807673	0.0670571	Rv1242	vapC33	possible toxin
MT1280.1	3.89945	6.70376	6.60743	7.55677	0.449053	2.65927	2.19667	0.138309532216562	0.272179	Rv1243c	PE_PGRS23	PE_PGRS-family protein
MT1281	173.59	153.262	142.557	135.961	-0.228433088071048	7.24273	1.81115	0.178370282338309	0.325031	Rv1244	lpqZ	lipoprotein
MT1283	113.279	154.88	156.006	193.917	0.392557917961293	7.27276	5.4314	0.019777798745485	0.0617185	Rv1245c	Rv1245c	Probable short-chain type dehydrogenase/reductase
MT1284	119.323	86.8252	141.153	128.16	0.401923	6.89435	4.95598	0.0260005274554545	0.0757398	Rv1246c/Rv1247c	relE/relB1	Toxin RelE
MT1286	974.797	816.98	1287.28	1212.92	0.485637813912019	10.0676	8.46924	0.0036120231621349	0.0161729	Rv1248c	Rv1248c	Multifunctional alpha-ketoglutarate metabolic enzyme
MT1287	147.984	124.69	175.477	160.825	0.306504543206734	7.25121	3.25822	0.071066252601888	0.166882	Rv1249c	Rv1249c	possible membrane protein
MT1288	2.98958	5.87157	3.39143	3.90027	-0.234273840901521	2.06353	0.541190131712353	0.461939915415945	0.624646
MT1289	69.0202	62.3681	73.6173	63.745	0.062240906212723	6.07246	0.11433	0.735267620917191	0.833376	Rv1250	Rv1250	Probable drug-transport integral membrane protein
MT1290	203.161	163.849	199.685	169.357	0.0113779604284546	7.52448	0.0047481124606108	0.945064005763464	0.965414	Rv1251c	Rv1251c	hypothetical protein
MT1291	77.794	74.6198	60.8702	66.5484	-0.259137984553492	6.13078	1.96262	0.161232863490326	0.303502	Rv1252c	lprE	lipoprotein
MT1292	245.015	225.061	237.458	278.808	0.132134459216378	7.94657	0.564799	0.452333280183867	0.616045	Rv1253	deaD	ATP-dependent DNA/RNA helicase
MT1293	145.969	123.072	129.693	114.205	-0.139222273093437	7.00386	0.672216757373924	0.412279810540953	0.580748	Rv1254	Rv1254	probable acyltransferase
MT1294	16.2477	15.0257	17.4249	16.9418	0.137176	4.04601	0.293552355050958	0.587953	0.728299	Rv1255c	Rv1255c	probable transcriptional regulator (TetR/AcrR family)
MT1295	38.0196	47.4349	50.2282	58.565	0.352297384307401	5.60521	3.24735	0.0715391278862029	0.167621	Rv1256c	cyp130	Probable cytochrome P-450
MT1296	252.489	231.442	320.431	288.559	0.330990144007654	8.09453	3.81516	0.0507908096719934	0.127779	Rv1257c	Rv1257c	probable oxidoreductase
MT1297	54.9172	47.2962	66.7175	35.8947	-0.0563709386947637	5.68135	0.0635246919046324	0.801009332881992	0.877796	Rv1258c	Rv1258c	probable multidrug resistance pump
MT1297.1	20.2121	32.8253	39.8785	41.867	0.660323366569507	5.07969	7.61378	0.00579238648360003	0.0236019	Rv1259	udgB	probable uracil DNA glycosylase
MT1298	251.904	186.503	142.674	128.526	-0.678752272845072	7.47174	15.3613	8.8789433604129e-05	0.000706239	Rv1260	Rv1260	probable oxidoreductase
MT1299	131.021	101.574	127.822	109.025	0.0331565341839552	6.87606	0.0358544093317832	0.849816467505678	0.910599	Rv1261c	Rv1261c	conserved hypothetical protein
MT1300	172.096	141.842	171.501	156.986	0.0706751582391966	7.32832	0.176356203752885	0.674523544892925	0.794246	Rv1262c	Rv1262c	Hypothetical hit-like protein
MT1301	97.8762	79.7054	72.9741	67.4015	-0.332731467668054	6.31465	3.2268	0.0724423106812426	0.169117	Rv1263	amiB2	putative amidase AMI2_MYCTU Q11056
MT1302	198.027	214.335	231.085	237.977	0.186759503351696	7.78444	1.25855	0.261925374544653	0.426204	Rv1264	Rv1264	adenylate cyclases
MT1303	194.777	157.561	237.751	278.626	0.555271995248978	7.76338	8.89249	0.00286346117628333	0.0134666	Rv1265	Rv1265	cAMP regulated protein
MT1304	259.638	281.604	261.9	302.332	0.0575756080398556	8.11105	0.115688950501109	0.733758	0.833376	Rv1266c	pknH	probable transmembrane serine/threonine protein kinase H
MT1305	72.3348	70.9674	56.5432	60.8198	-0.288663502249689	6.02862	2.40333	0.121077034344039	0.245793	Rv1267c	embR	regulator of embAB genes (AfsR/DndI/RedD family)
MT1305.1	3.24954	4.02226	4.0931	2.55955	-0.157686001669624	1.85028	0.225677	0.634747619160013	0.766738
MT1306	10.6585	6.14897	6.0227	5.60664	-0.483389518822647	2.84881	2.58745	0.107713443773083	0.226415	Rv1268c	Rv1268c	hypothetical protein
MT1307	65.4457	37.0325	26.0789	25.4736	-0.934884627722224	5.27056	14.4424	0.00014451367185538	0.00108863	Rv1269c	Rv1269c	Conserved probable secreted protein
MT1308	194.842	147.39	94.9599	97.4458	-0.816865458154061	7.06359	20.2082	6.94546989259844e-06	7.56221e-05	Rv1270c	lprA	lipoprotein
MT1309	41.5291	20.851	25.7281	15.2354	-0.574246476379578	4.69622	5.93516	0.0148417618554718	0.0493281	Rv1271c	Rv1271c	conserved hypothetical protein
MT1310	106	66.4366	51.2222	42.7811	-0.843066786452802	6.0598	18.3894	1.80054800030244e-05	0.000170838	Rv1272c	Rv1272c	Probable drugs-transport transmembrane ATP-binding protein ABC transporter
MT1311	62.7161	44.1061	38.4167	30.6537	-0.616432017594205	5.46195	8.67287	0.00322982822128902	0.0149141	Rv1273c	Rv1273c	Probable drugs-transport transmembrane ATP-binding protein ABC transporter
MT1312	192.568	168.195	219.449	203.667	0.232313233093186	7.61526	1.96697	0.160770278415772	0.30306	Rv1274	lprB	possible lipoprotein
MT1312.1	146.619	119.651	187.464	165.091	0.409467213148161	7.27432	5.96718	0.0145745848171348	0.0487655	Rv1275	lprC	possible lipoprotein
MT1313	9.8786	12.3442	9.00482	7.19112	-0.458098974840224	3.28329	2.49673	0.114083018685931	0.236412	Rv1276c	Rv1276c	hypothetical protein
MT1314	231.627	247.669	216.525	288.803	0.0626166298901115	7.94409	0.129244195911269	0.719216973021227	0.824534	Rv1277	Rv1277	hypothetical protein
MT1315	165.922	233.152	208.69	226.459	0.143766194621989	7.70516	0.669755757561063	0.413136774013634	0.581749	Rv1278	Rv1278	hypothetical protein
MT1316	252.359	180.863	173.314	154.061	-0.386886388746879	7.57176	5.09842	0.0239476310348414	0.0713238	Rv1279	Rv1279	Probable dehydrogenase FAD flavoprotein GMC oxidoreductase
MT1317	344.191	244.156	306.339	242.975	-0.0876225331573772	8.15236	0.262214255070592	0.608603	0.745782	Rv1280c	oppA	probable oligopeptide transport protein
MT1318	170.731	113.317	121.624	85.8669	-0.444916398668572	6.94233	6.60031	0.0101960951404722	0.0370957	Rv1281c	oppD	probable peptide transport protein
MT1319	122.053	69.5342	69.6996	48.2658	-0.668591123208759	6.27578	12.5042	0.000406031215559997	0.00262668	Rv1282c	oppC	oligopeptide transport system permease
MT1320	185.549	122.378	114.782	88.853	-0.577751	6.99989	10.9818	0.000920087045432615	0.00523045	Rv1283c	oppB	oligopeptide transport protein
MT1322	115.424	164.173	96.7726	124.077	-0.329613311549132	6.96863	3.59429	0.0579784379530035	0.141919	Rv1284	canA	carbonic anhydrase
MT1323	145.839	539.213	233.833	509.656	0.297621817529805	8.48097	2.01239	0.156019839797831	0.296348	Rv1285	cysD	probable sulfate adenylyltransferase subunit 2
MT1324	386.5	668.665	457.024	636.475	0.0849782276863759	9.06959	0.219587	0.639354993950973	0.770981	Rv1286	cysN	ATP:sulphurylase subunit 1
MT1325	183.339	182.25	167.876	170.515	-0.111539246686496	7.46033	0.451758872481005	0.501500875214904	0.659819	Rv1287	Rv1287	conserved hypothetical protein
MT1326	111.654	107.029	113.203	105.246	-0.00220897933832529	6.77341	0.000162466188008636	0.989830261232893	0.994561	Rv1288	Rv1288	Possible esterase
MT1327	136.286	134.445	120.98	165.822	0.0662976438867662	7.12405	0.131462645049965	0.716920312867586	0.822374	Rv1289	Rv1289	hypothetical protein
MT1328	69.4102	54.3698	74.0851	69.7783	0.226981992094337	6.06633	1.44566	0.229225980239866	0.387062	Rv1290c	Rv1290c	hypothetical protein/ involved in virulence
MT1330.1	41.2692	39.0205	38.8844	37.7839	-0.0660898602149107	5.29834	0.0985747353835684	0.753546757751746	0.846121
MT1331	547.418	489.606	490.295	510.813	-0.0488659583167743	8.99334	0.0756059066276862	0.783342911053921	0.86784	Rv1292	argS	arginyl-tRNA synthase
MT1332	533.575	461.542	484.155	426.165	-0.127633055180739	8.89624	0.535481	0.464311807510391	0.626577	Rv1293	lysA	diaminopimelate decarboxylase
MT1333	417.631	367.181	383.523	351.756	-0.0924099937732584	8.57036	0.282088006396279	0.595335917929707	0.735257	Rv1294	thrA	homoserine dehydrogenase
MT1334	346.141	279.061	292.364	237.612	-0.237782337193398	8.17443	1.96721	0.160744401103088	0.30306	Rv1295	thrC	homoserine synthase
MT1335	141.485	145.726	177.991	163.446	0.248196509665609	7.29713	2.16794	0.140915	0.276351	Rv1296	thrB	homoserine kinase
MT1336	1550.03	823.407	1247.99	990.364	-0.0233041677169419	10.1712	0.0157340987871066	0.900178677421078	0.942222	Rv1297	rho	transcription termination factor rho
MT1337	210.895	445.083	485.383	492.714	0.673596	8.67472	7.97404	0.00474529295952393	0.0200659	Rv1298	rpmE	50S ribosomal protein L31
MT1338	387.93	322.751	733.191	534.154	0.822615	8.95013	21.3906	3.74606491927274e-06	4.30204e-05	Rv1299	prfA	probable peptide chain release factor 1
MT1339	472.028	410.732	560.287	506.304	0.274548302716374	8.92909	2.52143	0.112308	0.233768	Rv1300	hemK	protoporphyrinogen oxidase
MT1340	291.224	243.092	311.134	275.944	0.139136	8.13161	0.673078529999856	0.411980346001506	0.580531	Rv1301	Rv1301	conserved hypothetical protein
MT1341	266.397	173.419	319.554	226.764	0.324569752440881	7.94619	3.71623	0.0538857652069134	0.133625	Rv1302	rfe	Probable undecaprenyl phosphate GlcNAc-1-phosphate transferase (WecA),
MT1342	51.4077	94.5461	60.6363	76.5428	-0.0365445390162065	6.14822	0.0325448929758352	0.856836959570381	0.915383
MT1343	143.5	189.601	118.057	159.911	-0.263512905952197	7.25641	2.44168	0.118149848549082	0.241351	Rv1303	Rv1303	conserved hypothetical transmembrane protein
MT1344	290.899	312.811	233.774	288.498	-0.215859037272145	8.13758	1.57749	0.209123130754425	0.364093	Rv1304	atpB	Probable ATP synthase a chain AtpB
MT1345	340.422	409.9	310.783	309.218	-0.269181324936432	8.42083	2.28607	0.130539882550516	0.260231	Rv1305	atpE	ATP synthase c chain
MT1346	637.69	460.525	383.582	418.791	-0.435144860347872	8.89254	4.85337	0.0275921051319369	0.0789903	Rv1306	atpF	ATP synthase b chain
MT1347	1050.51	796.037	677.934	737.639	-0.370865731000503	9.67178	3.99197	0.0457175228299005	0.117766	Rv1307	atpH	ATP synthase [delta] chain
MT1348	1612.1	1100.02	1046.25	891.395	-0.463583261689924	10.1831	7.39558	0.00653842058318304	0.025926	Rv1308	atpA	ATP synthase [alpha] chain
MT1349	668.106	359.183	368.262	293.861	-0.574776	8.72261	8.7451	0.003104350974352	0.0144014	Rv1309	atpG	ATP synthase [gamma] chain
MT1350	920.075	609.996	694.833	519.102	-0.318988368192642	9.42227	3.38538	0.0657768848033085	0.156771	Rv1310	atpD	ATP synthase [beta] chain
MT1351	320.86	170.83	214.245	136.266	-0.454955510864974	7.71863	7.06508	0.00786007920304647	0.0298309	Rv1311	atpC	ATP synthase [epsilon] chain
MT1352	154.353	84.5598	102.094	69.7783	-0.437804023204978	6.68351	5.709	0.0168781495005689	0.0547715	Rv1312	Rv1312	conserved hypothetical protein
MT1353	152.988	110.173	146.182	112.072	-0.0206145023511451	7.0274	0.0150374364322516	0.902402294322496	0.943445	Rv1313c	Rv1313c	transposase
MT1354	89.2324	71.1061	81.3942	84.2215	0.0559747625577979	6.35033	0.0852718834688488	0.770276303040291	0.860059	Rv1314c	Rv1314c	conserved hypothetical protein
MT1355	550.927	620.953	593.441	648.786	0.0852306612177173	9.23755	0.243214535031967	0.621893987598917	0.757179	Rv1315	murA	UDP-N-acetylglucosamine-1-carboxyvinyltransferase
MT1356	70.3851	82.2944	91.51	57.9556	-0.0633446690221073	6.24146	0.0774431349207703	0.780792771012744	0.866573
MT1357	78.7039	72.678	134.312	101.407	0.625723718551454	6.59811	11.3836	0.000740953908614753	0.00435502	Rv1316c	ogt	methylated-DNA-protein-cysteine methyltransferase
MT1358	126.472	174.252	265.642	268.692	0.846821	7.70651	21.8926	2.88348445810193e-06	3.4097e-05	Rv1317c	alkA	probable bifunctional regulatory protein and DNA repaor enzyme
MT1359	82.0184	48.3595	50.4036	41.2575	-0.467106352433628	5.7971	5.04241	0.0247339903680802	0.0731737	Rv1318c	Rv1318c	Possible adenylate cyclase (ATP pyrophosphate-lyase) (adenylyl cyclase)
MT1360	185.289	110.543	114.899	87.0857	-0.517435369134811	6.96057	8.15202	0.00430131561908143	0.0184906
MT1361	113.344	76.839	72.214	53.7506	-0.583269665194564	6.30631	10.0054	0.00156085694203938	0.00812012	Rv1319c	Rv1319c	Possible adenylate cyclase (ATP pyrophosphate-lyase) (adenylyl cyclase)
MT1362	225.778	138.514	101.626	94.8253	-0.849605952157528	7.13219	19.313	1.10947039134444e-05	0.000113789	Rv1320c	Rv1320c	Possible adenylate cyclase (ATP pyrophosphate-lyase) (adenylyl cyclase)
MT1363	250.605	159.642	186.528	156.62	-0.227138020169657	7.55799	1.65151	0.198753520113422	0.350427	Rv1321	Rv1321	endonuclease NucS
MT1363.1	75.4543	60.4725	68.0624	62.8309	-0.0467933341377388	6.06198	0.0627273420205512	0.802236064125182	0.878041	Rv1322	Rv1322	hypothetical protein
MT1364	1162.3	1309.31	1033.51	1555.42	0.0396686520267922	10.3052	0.0520326726086751	0.819563281283952	0.889665	Rv1322a	Rv1322a	conserved protein
MT1365	693.842	881.706	709.977	1035.16	0.132437587719361	9.69747	0.610131541448482	0.434738286764433	0.602585	Rv1323	fadA4	acetyl-CoA C-acetyltransferase (aka thiL)
MT1366	727.897	785.958	604.668	997.372	0.0383334617972113	9.60564	0.0394661403672671	0.842528036851508	0.905224	Rv1324	Rv1324	Possible thioredoxin
MT1367	24.1766	62.4605	42.9775	53.6897	0.296836489559125	5.52275	1.30758	0.252833313278612	0.415061	Rv1325c	PE_PGRS24	PE_PGRS-family protein
MT1368	423.48	626.362	468.66	692.968	0.146017043877323	9.11112	0.712636486153932	0.398569949402018	0.567859	Rv1326c	glgB	1,4-[alpha]-glucan branching enzyme
MT1369	561.326	962.244	747.517	1224.2	0.380252265460592	9.7714	5.17348	0.0229341625551537	0.0690277	Rv1327c	glgE	probable glucanase
MT1370	661.282	618.734	498.364	483.938	-0.381268110376229	9.14388	4.88288	0.0271243630003486	0.0779874	Rv1328	glgP	probable glycogen phosphorylase
MT1371	148.179	120.945	132.909	115.119	-0.114086492432746	7.01563	0.454562673694355	0.500176139542446	0.659161	Rv1329c	dinG	probable ATP-dependent helicase
MT1372	102.556	116.276	124.84	142.482	0.288455757132324	6.92661	2.79792	0.0943867483096306	0.205649	Rv1330c	pncB1	Nicotinic acid phosphoribosyl transferase
MT1373	150.519	238.608	188.283	305.866	0.340714004221305	7.78753	4.1973	0.0404884805946769	0.107648	Rv1331	Rv1331	ATP-dependent Clp protease adapter protein ClpS
MT1374	401.253	501.071	517.134	730.508	0.455095684144589	9.0704	6.59919	0.0102024894241096	0.0370957	Rv1332	Rv1332	putative transcriptional regulator
MT1375	226.948	326.681	311.368	363.822	0.305385	8.26364	2.94055	0.0863814413380729	0.192846	Rv1333	Rv1333	probable hydrolase
MT1376	111.134	130.145	429.717	585.101	2.06023	8.29514	126.435	2.46989686086928e-29	2.52373e-27	Rv1334	mec	possible hydrolase involved in cystein biosynthesis
MT1376.1	75.7143	85.6232	260.906	269.667	1.71953	7.43523	100.963	9.37172402903256e-24	6.43902e-22	Rv1335	cysO	sulfur carrier protein
MT1377	202.771	221.686	616.128	559.079	1.46871	8.64391	64.9117	7.83315183682603e-16	3.39295e-14	Rv1336	cysM	cysteine synthase B
MT1378	158.513	218.219	295.405	298.98	0.675478880881155	7.92419	13.8911	0.000193709880552276	0.00138588	Rv1337	Rv1337	Rhomboid protease 2
MT1379	84.683	93.5752	158.461	135.595	0.718949745884005	6.88493	15.328	9.03673096068994e-05	0.000714511	Rv1338	murI	glutamate racemase
MT1380	556.386	515.912	467.257	460.171	-0.208396113846397	8.96591	1.42334	0.232855	0.392192	Rv1339	Rv1339	conserved hypothetical protein
MT1381	329.503	302.733	285.874	272.958	-0.177123	8.21858	1.0614	0.302895587663984	0.470948	Rv1340	rphA	ribonuclease PH
MT1382	118.933	113.918	136.242	118.654	0.127318	6.93129	0.539609405753879	0.462594646446209	0.624895	Rv1341	Rv1341	non-canonical purine NTP pyrophosphatase
MT1383	152.598	100.187	169.162	145.346	0.342366858759212	7.14889	3.68213	0.0549985299024328	0.135877	Rv1342c	Rv1342c	conserved membrane protein
MT1384	111.784	106.567	94.6675	101.773	-0.152841652186922	6.69781	0.739072277768855	0.389958222767127	0.56033	Rv1343c	lprD	probable conserved lipoprotein
MT1385	180.479	162.092	106.07	106.648	-0.685272693930039	7.11831	16.2854	5.44828208185827e-05	0.000454213	Rv1344	mbtL	acyl carrier protein involved in mycobactin synthesis
MT1387	300.972	223.166	236.347	174.354	-0.352391413223418	7.86922	4.52467	0.0334095449559644	0.091882	Rv1345	mbtM	probable fatty acyl AMP ligase in mycobactin biosynthesis
MT1388	299.413	179.383	171.384	122.31	-0.679125032618476	7.59409	15.7262	7.32044013723802e-05	0.000597786	Rv1346	mbtN	acyl-CoA dehydrogenase
MT1389	77.4041	44.2448	28.1254	29.5567	-1.02188	5.4895	16.811	4.12937436400914e-05	0.000357729	Rv1347c	mbtK	possible aminoglycoside 6'-N-acetyltransferase
MT1390	307.277	157.746	111.917	82.5151	-1.1971	7.36591	39.9793	2.56662449222115e-10	6.59871e-09	Rv1348	irtA	iron regulated transporter
MT1392	118.478	54.0924	51.2807	26.9362	-1.10893	5.97225	33.2579	8.07115861446422e-09	1.66651e-07	Rv1349	irtB	priron regulated transporterobable membrane protein
MT1393	30.0258	44.0137	27.2483	43.878	-0.0707802244632044	5.18668	0.109738596150466	0.740441936794835	0.837305	Rv1350	fabG2	3-oxoacyl-[ACP] reductase
MT1394	82.3434	100.14	106.304	118.532	0.305461475555458	6.67167	2.94938	0.0859106556998462	0.192413	Rv1351	Rv1351	hypothetical protein
MT1395	136.286	124.274	122.559	130.72	-0.0398706250415722	7.0064	0.0532902879919561	0.817433749631258	0.889242	Rv1352	Rv1352	conserved protein
MT1396	20.7971	14.101	16.3139	16.8199	-0.0483789358315718	4.09634	0.0323709999336543	0.857215824142504	0.915383	Rv1353c	Rv1353c	transcriptional regulator (TetR/AcrR family)
MT1397	46.8584	32.964	27.7746	24.3767	-0.595542149071905	5.04862	7.20516	0.00726940744826162	0.0280976	Rv1354c	Rv1354c	conserved hypothetical protein
MT1398	56.412	38.5582	37.2472	33.7008	-0.397122859466851	5.37781	3.24616	0.0715910722589683	0.167621	Rv1355c	moeY	weak similarity to E. coli MoeB
MT1399	5.06928	6.3339	7.65994	6.277	0.285045689771777	2.69016	0.896526818916399	0.343714708897486	0.513415	Rv1356c	Rv1356c	hypothetical protein
MT1402	30.8706	20.5736	22.2197	20.2936	-0.248006137141738	4.55995	0.988593244938398	0.320086	0.491406	Rv1358	Rv1358	transcriptional regulator (LuxR/UhpA family)
MT1403	12.3483	7.72088	10.7005	9.44597	0.0392509897646673	3.34321	0.0196981619286554	0.888383349973526	0.935079	Rv1359	Rv1359	putative transcriptional regulator
MT1404	29.5708	15.6729	17.3664	14.0775	-0.465276538791082	4.26764	3.14073	0.076359440765177	0.176299
MT1405	156.888	118.818	130.687	90.0719	-0.331356302251189	6.95678	3.61479	0.0572678931518539	0.140438	Rv1360	Rv1360	coenzyme F420-dependent
MT1406	612.668	871.627	348.615	349.135	-1.06684	9.09186	30.2689	3.76110168285892e-08	6.57368e-07	Rv1361c	PPE19	PPE-family protein
MT1407	69.8651	63.8938	91.4515	81.4181	0.368990618551957	6.26233	4.10682	0.0427107013294263	0.111901	Rv1362c	Rv1362c	possible mebrane protein
MT1408	70.645	67.5924	85.3119	83.1245	0.285298264504113	6.26259	2.45841	0.116896937768995	0.23975	Rv1363c	Rv1363c	possible mebrane protein
MT1409	35.29	48.1746	56.8941	56.7367	0.460152211374937	5.62624	4.92034	0.0265422456278146	0.0769243	Rv1363c	Rv1363c	possible membrane protein
MT1410	200.237	321.318	372.823	552.315	0.838891081947263	8.499	22.9913	1.62731967582474e-06	2.0077e-05	Rv1364c	Rv1364c	possible sigma factor regulatory protein
MT1411	51.7327	59.7328	43.6207	49.3628	-0.260658200642082	5.67908	1.74044	0.187083339579658	0.336277	Rv1365c	rsfA	Anti-anti-sigma factor RsfA
MT1412	51.2128	41.4708	44.4978	48.0221	0.00489840733015238	5.53619	0.000542110545865171	0.981424318690666	0.990873	Rv1366	Rv1366	probable alarmone synthetase/ (p)ppGpp sythesis
MT1413	18.0674	41.3321	43.3869	54.6647	0.823639427038465	5.30347	10.812	0.00100844653396253	0.00568155	Rv1366a	Rv1366a	conserved protein
MT1414	116.659	118.125	162.321	162.714	0.469247413047346	7.12992	7.8038	0.00521364278590886	0.0216646	Rv1367c	Rv1367c	conserved protein
MT1414.1	14.8829	19.649	12.1039	11.3961	-0.544408727463985	3.87216	4.01446	0.0451117328554693	0.116886
MT1415	124.782	96.9502	108.818	90.1328	-0.151409273695918	6.71802	0.739948372593702	0.389677416714298	0.560196	Rv1368	lprF	lipoprotein
MT1416	31.0006	22.7928	31.283	20.0498	-0.0848727393329511	4.72161	0.133757368411837	0.714567644006527	0.820384	Rv1371	Rv1371	probable conserved membrane protein
MT1417	47.7682	62.6455	51.3976	57.3462	-0.0120062190923647	5.77913	0.00365830992122085	0.951770187207578	0.970275	Rv1372	Rv1372	alpha-pyrone synthesis polyketide synthase-like protein
MT1418	95.6665	75.5907	84.6102	86.0497	0.00502007219105864	6.41923	0.00069226980269832	0.979009264822688	0.989187	Rv1373	Rv1373	Glycolipid sulfotransferase
MT1418.1	4.48437	7.02739	4.0931	3.71744	-0.536851081760212	2.31346	2.86031	0.0907902563927584	0.199623	Rv1374c	Rv1374c	hypothetical protein
MT1419	272.831	434.311	114.256	183.556	-1.24904	7.97382	53.9285	2.07921461320023e-13	7.26813e-12	Rv1375	Rv1375	conserved hypothetical protein
MT1420	48.8081	62.2756	33.6219	34.2492	-0.701075498723856	5.48786	10.7982	0.00101596709427173	0.00569427	Rv1376	Rv1376	conserved hypothetical protein
MT1421	118.933	108.508	117.94	122.371	0.0808548969402329	6.87093	0.211762605025539	0.645389386182505	0.775596	Rv1377c	Rv1377c	probable transferases
MT1422	74.0895	204.58	99.4038	192.088	0.162969	7.15676	0.765501952509879	0.381612166344674	0.552759	Rv1378c	Rv1378c	conserved hypothetical protein
MT1423	394.234	210.313	171.735	147.906	-0.853931277683936	7.8526	18.5405	1.66329718550384e-05	0.000160102	Rv1379	pyrR	regulatory protein pyrimidine biosynthesis
MT1424	56.282	90.4314	69.8166	62.0387	-0.118601377826025	6.12476	0.277181707806733	0.598554	0.738922	Rv1380	pyrB	aspartate carbamoyltransferase
MT1425	104.31	134.121	106.713	95.3128	-0.230646923747985	6.78456	1.4517	0.228254605508947	0.385912	Rv1381	pyrC	dihydroorotase
MT1426	28.466	47.6198	32.6278	26.4487	-0.328710159733529	5.08474	1.46472	0.226181210429183	0.383461	Rv1382	Rv1382	probable export or membrane protein
MT1427	107.17	117.293	89.5804	69.7783	-0.503890809949568	6.58619	6.62983	0.0100284873285118	0.0365984	Rv1383	carA	carbamoyl-phosphate synthase subunit
MT1428	318.13	294.549	245.527	172.099	-0.574257810646696	8.00952	10.2377	0.00137597541274202	0.00736704	Rv1384	carB	carbamoyl-phosphate synthase subunit
MT1429	19.1723	34.952	26.7221	15.723	-0.338073034737887	4.60243	0.926874482950993	0.335676407869291	0.506237	Rv1385	pyrF	orotidine 5'-phosphate decarboxylase
MT1430	92.8069	88.0735	18.4189	23.5844	-2.11466	5.80362	97.1325	6.4841020207787e-23	4.37952e-21	Rv1386	PE15	PE-family protein
MT1431	542.023	428.809	146.65	181.18	-1.56409	8.34333	58.9601	1.60899423692322e-14	6.16523e-13	Rv1387	PPE20	PPE-family protein
MT1433	1285.84	1099.65	1316.57	1087.57	0.00906965930217203	10.2258	0.00312844748160046	0.955395559257677	0.972478	Rv1388	mihF	putative integration host factor
MT1434	1621	1086.47	1461.53	994.02	-0.138858954232476	10.3341	0.743737194153056	0.388466345281176	0.558859	Rv1389	gmk	probable guanylate kinase
MT1435	808.356	939.081	861.48	1332.25	0.298361081030371	9.94457	2.83347	0.0923187626813513	0.201805	Rv1390	rpoZ	probable DNA-directed RNA polymerase
MT1436	576.274	676.802	666.59	887.738	0.300820723003906	9.45525	3.0312	0.0816773391869684	0.185436	Rv1391	dfp	probable DNA/pantothenate metabolism flavoprotein homolog
MT1437	1082.16	1100.02	1791.55	1233.46	0.446231382126947	10.3464	5.91682	0.0149970213118409	0.0497288	Rv1392	metK	S-adenosylmethionine synthase
MT1438	91.2471	90.2002	91.1007	99.2741	0.0682382133937685	6.5402	0.144360634994039	0.703983866768391	0.814096	Rv1393c	Rv1393c	FAD-containing monooxygenase
MT1439	86.5678	108.046	92.0947	122.432	0.135151	6.67814	0.582954	0.445157	0.611918	Rv1394c	cyp132	possible cytochrome p450
MT1440	35.8099	49.6541	80.868	112.803	1.17945	6.12697	40.3641	2.10782644594085e-10	5.52611e-09	Rv1395	Rv1395	transcriptional regulator (AraC/XylS family)
MT1441	371.552	396.631	263.713	449.872	-0.155803715330098	8.53355	0.591511030488618	0.441835406740606	0.60937	Rv1397c	vapC10	possible toxin vapC10
MT1442	1587.4	1821.43	1103.68	1825.51	-0.260402312735894	10.6299	2.18731	0.139152419101185	0.273433	Rv1398c	vapB10	possible antitoxin
MT1443	93.9117	77.0701	94.9599	96.1051	0.167376	6.50166	0.787321728169417	0.374911206660776	0.54666	Rv1399c	nlhH	probable non-lipolytic carboxylesterase
MT1444	157.993	136.109	120.98	138.338	-0.180433688668863	7.11336	1.02152	0.312158630818149	0.481779	Rv1400c	lipI	probable lipase
MT1445	72.2698	74.6198	75.2546	63.1356	-0.0915447437847241	6.1586	0.229124905405762	0.632173458406764	0.76529	Rv1401	Rv1401	possible membrane protein
MT1446	34.1852	33.8887	42.6852	27.2409	0.00364432859019834	5.11333	0.000233875521885807	0.987798435554669	0.994238	Rv1402	priA	putative primosomal protein N'PriA
MT1447	56.347	158.44	20.9333	81.9666	-1.18041	6.31477	34.4589	4.35352456778516e-09	9.37773e-08	Rv1403c	Rv1403c	putative SAM-dependent methyltransferase
MT1448	263.538	586.371	223.132	334.875	-0.525122	8.46001	7.26323	0.00703807103695347	0.0275238	Rv1404	Rv1404	transcriptional regulator (MarR family)
MT1449	89.2324	476.244	21.2841	140.532	-1.90646	7.50822	112.5	2.77647327405389e-26	2.21285e-24	Rv1405c	Rv1405c	similar to phosphatidylethanolamine N-methyltransferase
MT1450	75.9743	127.88	108.935	156.072	0.402392704544419	6.87457	5.12474	0.0235870718244872	0.0704606	Rv1406	fmt	methionyl-tRNA formyltransferase
MT1451	63.561	131.671	142.557	143.457	0.641183442349525	6.91221	7.33932	0.00674622209119226	0.0265125	Rv1407	fmu	similar to Fmu protein
MT1452	240.661	235.972	249.679	290.204	0.175971433209028	7.99004	1.05621	0.304080984542889	0.472238	Rv1408	rpe	ribulose-phosphate 3-epimerase
MT1453	213.3	216.832	235.821	202.205	0.0219393058056883	7.76258	0.016606860693571	0.897462407051689	0.940996	Rv1409	ribG	riboflavin biosynthesis
MT1454	1195.83	1173.71	994.74	1014.92	-0.237656178734502	10.0966	2.08886	0.148376687902415	0.286473	Rv1410c	Rv1410c	Aminoglycosides/tetracycline-transport integral membrane protein
MT1455	648.868	743.979	706.82	834.353	0.144423322091643	9.51889	0.713398144004117	0.398318013400187	0.567859	Rv1411c	lprG	lipoprotein
MT1456	89.4274	84.2362	100.339	87.7561	0.112516591384561	6.50064	0.376190016451844	0.539649361518178	0.690148	Rv1412	ribC	riboflavin synthase [alpha] chain
MT1457	39.1895	33.2876	50.4036	38.0276	0.277686114348671	5.33384	1.72708	0.188784411972747	0.338877	Rv1414	Rv1414	hypothetical protein
MT1458	505.369	681.657	592.798	707.107	0.141431330226374	9.28044	0.650444912960324	0.419953656478928	0.588024	Rv1415	ribA2	probable GTP cyclohydrolase II
MT1459	159.877	161.121	175.828	163.385	0.0785738848445284	7.36777	0.216541935117476	0.641687517531015	0.772545	Rv1416	ribH	riboflavin synthase [beta] chain
MT1460	36.5248	40.5462	49.7019	38.5761	0.185623487860871	5.37344	0.673983322627564	0.411666277049755	0.580294	Rv1417	Rv1417	possible conserved membrane protein
MT1461	181.584	155.065	170.799	146.077	-0.0872358437461935	7.35305	0.267048139358221	0.605319	0.743419	Rv1418	lprH	lipoprotein
MT1462	376.492	458.167	696.938	743.733	0.793529187699361	9.15214	20.4	6.28293865047331e-06	6.91644e-05	Rv1419	Rv1419	13kDA secreted protein
MT1463	429.004	421.505	532.863	585.101	0.393013506817564	8.94317	4.98903	0.0255084609737189	0.0746886	Rv1420	uvrC	excinuclease ABC subunit C
MT1464	166.506	158.717	140.744	147.235	-0.175289088433484	7.26129	1.07254	0.300371943629274	0.467985	Rv1421	Rv1421	conserved hypothetical protein
MT1465	129.137	145.772	131.915	138.399	-0.0222740559605883	7.09196	0.0176855451896927	0.894203652691089	0.93922	Rv1422	cuvA	carbon utilization and virulence protein A
MT1466	40.4243	78.9194	54.7891	54.6038	-0.0505703313203174	5.84122	0.0431846344440885	0.835378003654604	0.900743	Rv1423	WhiA	probable transcription regulatory protein
MT1467	46.0785	43.69	36.8379	49.3628	-0.0714882655797403	5.46278	0.105171	0.745709793137028	0.840346	Rv1424c	Rv1424c	possible membrane protein
MT1468	158.968	156.406	131.213	158.205	-0.129718277946807	7.24137	0.551751530835986	0.457602901498457	0.620714	Rv1425	Rv1425	Possible triacylglycerol synthase
MT1469	104.505	86.2242	72.2724	60.4542	-0.522124600267476	6.33941	8.10029	0.00442581981776607	0.0188925	Rv1426c	lipO	probable esterase
MT1470	191.008	143.091	106.947	97.263	-0.696967391340388	7.07344	16.2229	5.63092180430119e-05	0.000467484	Rv1427c	fadD12	acyl-CoA synthase
MT1471	217.524	175.5	145.247	134.681	-0.482302899930045	7.39529	8.17404	0.00424942400846562	0.0183276	Rv1428c	Rv1428c	conserved hypothetical protein
MT1472	1766.97	3855.08	3036.32	5807.26	0.685982473496959	11.8204	24.4985	7.43677832116785e-07	1.01145e-05	Rv1429	Rv1429	conserved hypothetical protein
MT1474	139.86	150.673	179.512	245.717	0.533506345399795	7.48419	9.29359	0.00229956694267534	0.0112439	Rv1430	PE16	PE-family protein
MT1475	119.063	108.416	125.424	141.019	0.227569967844252	6.94937	1.62841	0.201923614284396	0.354322	Rv1431	Rv1431	Conserved membrane protein
MT1476	24.0466	30.1438	34.3236	32.9085	0.317967624527588	4.92951	1.90612	0.167395	0.310874	Rv1432	Rv1432	putative dehydrogenase
MT1477	181.844	212.255	240.382	288.376	0.422440678526059	7.85067	6.50258	0.010771835337187	0.0387417	Rv1433	Rv1433	possible membrane protein
MT1478	13.908	14.7945	21.518	23.2188	0.639818469927095	4.20682	6.71169	0.00957830878972925	0.0352118	Rv1434	Rv1434	hypothetical protein
MT1479	289.729	439.351	510.819	589.124	0.620242944980444	8.83723	11.3417	0.000757857780440611	0.00444781	Rv1435c	Rv1435c	Probable conserved proline, glycine, valine-rich secreted protein
MT1480	596.941	426.96	489.067	435.307	-0.129860269555238	8.92828	0.516388209447598	0.472386448749591	0.634466	Rv1436	gap	glyceraldehyde 3-phosphate dehydrogenase
MT1481	321.185	234.678	244.709	170.637	-0.425960472755058	7.92426	6.46901	0.0109772	0.039092	Rv1437	pgk	probable phosphoglycerate kinase
MT1482	356.02	219.236	242.195	158.631	-0.511424490757584	7.93143	9.25762	0.00234517301863378	0.0113416	Rv1438	tpi	triosephosphate isomerase
MT1484	32.7554	16.6438	19.6469	15.4183	-0.428003863169451	4.40623	2.63834	0.104312662037329	0.221699	Rv1439c	Rv1439c	hypothetical protein
MT1485	209.27	166.762	197.054	162.836	-0.0605940162641844	7.52423	0.134910950722031	0.713393567963031	0.819744	Rv1440	secG	probable protein export membrane protein
MT1487	318.91	272.959	542.687	423.606	0.700493674058013	8.606	15.9861	6.38078264354935e-05	0.000523198	Rv1442	bisC	biotin sulfoxide reductase
MT1488	23.8516	22.4229	27.1314	34.6758	0.409457288641914	4.76151	2.92915	0.086993161122784	0.193534
MT1489	117.828	111.282	117.238	153.939	0.231269197347356	6.96783	1.52562	0.216771547718946	0.372825	Rv1443c	Rv1443c	hypothetical protein
MT1491	54.8522	40.5	45.141	35.4681	-0.236424398908696	5.4625	1.30508	0.253286616843066	0.415369	Rv1444c	Rv1444c	hypothetical protein
MT1492	132.971	84.4211	97.7081	65.8171	-0.402087456907929	6.57481	4.97877	0.0256602095085403	0.0748032	Rv1445c	devB	glucose-6-phosphate 1-dehydrogenase
MT1493	202.706	157.515	178.05	135.839	-0.200319244517493	7.39774	1.47168	0.22508	0.382167	Rv1446c	opcA	unknown function, may aid G6PDH
MT1494	390.66	290.157	298.27	230.055	-0.362095938520862	8.24027	4.4274	0.0353664293005261	0.0964649	Rv1447c	zwf2	glucose-6-phosphate 1-dehydrogenase
MT1495	230.847	188.121	226.992	187.579	-0.0142399457911642	7.70383	0.00736116876864301	0.931628	0.958569	Rv1448c	tal	transaldolase
MT1496	825.968	769.453	788.039	777.312	-0.0265690043519638	9.62626	0.0249842833172522	0.874406230141471	0.926589	Rv1449c	tkt	transketolase
MT1497.1	5.91416	19.0942	18.4189	21.2077	0.865973791932259	4.02662	6.20605	0.0127314079462701	0.0439136	Rv1450c	PE_PGRS27	PE_PGRS-family protein
MT1497.2	5.97915	5.73287	7.07521	5.42381	0.0815090779205186	2.62406	0.0764148213648603	0.782216	0.867094
MT1498	379.026	398.989	422.232	449.323	0.163577	8.68827	0.900259712008005	0.342712082365653	0.513415	Rv1451	ctaB	cytochrome c oxidase assembly factor
MT1499	2.27468	8.32191	6.25659	6.277	0.459692	2.56888	1.30725	0.252893647862074	0.415061	Rv1452c	PE_PGRS28	PE_PGRS-family protein
MT1500	39.6444	36.0154	32.4524	33.2742	-0.201141748056961	5.14804	0.874163823660595	0.349805159545422	0.519558	Rv1453	Rv1453	possible transcriptional activator protein
MT1501	136.936	140.363	124.489	134.864	-0.0974429847611644	7.06908	0.339549276373454	0.560089503725471	0.705645	Rv1454c	qor	Probable quinone oxidoreductase
MT1502	28.9859	17.2448	14.2089	12.0055	-0.777970917638779	4.18647	8.81604	0.00298594564679537	0.013917	Rv1455	Rv1455	conserved hypothetical protein
MT1503	101.321	97.1814	89.2296	87.3904	-0.168226660020729	6.55297	0.891496393835158	0.345072121319697	0.514831	Rv1456c	Rv1456c	antibiotic ABC transporter permease
MT1504	119.388	82.1557	82.973	61.3683	-0.473115050049392	6.43585	6.65609	0.00988172383098347	0.0362603	Rv1457c	Rv1457c	antibiotic ABC transporter permease
MT1505	163.972	130.099	129.283	110.609	-0.288568079600595	7.06175	2.9303	0.0869311482717003	0.193534	Rv1458c	Rv1458c	probable unidentified antibiotic transport ATP-binding protein ABC transporter
MT1506	393.974	315.077	277.863	232.858	-0.469997808559956	8.25291	7.44011	0.00637860507515072	0.0254697	Rv1459c	Rv1459c	probable glycosyltransferase
MT1507	153.833	391.222	199.042	296.177	-0.0168009712425776	8.02361	0.00664929887830112	0.935009944222201	0.958885	Rv1460	Rv1460	putative transcriptional regulator
MT1508	1335.17	1556.1	1345.58	1400.5	-0.0704309941930288	10.4609	0.190677654189443	0.662353209341694	0.786964	Rv1461	Rv1461	part of mobilization of sulfur machinery
MT1509	339.707	573.611	466.438	499.235	0.128024987232838	8.87616	0.403650410503815	0.525210029061628	0.678652	Rv1462	Rv1462	conserved hypothetical protein
MT1510	472.678	376.705	346.919	309.706	-0.364409043182066	8.55693	4.31767	0.0377185727613987	0.101766	Rv1463	Rv1463	ABC- transporter ATP-binding protein
MT1511	322.029	362.095	322.478	321.285	-0.0853537844772164	8.37544	0.238953385216347	0.624963059039459	0.759524	Rv1464	csd	probable cystein desulfurase
MT1512	122.508	113.825	122.208	101.468	-0.0846569370247375	6.84692	0.232296110801945	0.629826498861884	0.763571	Rv1465	Rv1465	Nitrogen fixation related protein
MT1513	231.562	171.431	216.525	150.282	-0.143295772125883	7.58911	0.747612415327225	0.387233208601928	0.558259	Rv1466	Rv1466	associated with Fe-S complex assebly and repair
MT1514	307.082	321.364	450.475	490.886	0.582026326194399	8.61676	11.0354	0.000893861703457626	0.00513262	Rv1467c	fadE15	acyl-CoA dehydrogenase
MT1514.1	93.0668	297.508	364.169	465.899	1.30473	8.25403	23.2929	1.39115211788987e-06	1.74331e-05	Rv1468c	PE_PGRS29	PE_PGRS-family protein
MT1515	170.861	154.279	378.846	268.326	0.973563979852493	7.92587	30.1968	3.90358435934021e-08	6.76552e-07	Rv1469	ctpD	probable cadmium-transporting ATPase
MT1516	114.189	151.69	216.583	286.548	0.920521392963842	7.58767	30.5164	3.31050385722751e-08	5.88945e-07	Rv1470	trxA	thioredoxin
MT1517	192.373	217.017	1951.24	2347.6	3.38893	10.2011	356.816	1.38944441818693e-79	1.10739e-76	Rv1471	trxB1	thioredoxin reductase
MT1518	369.278	293.763	1092.51	1016.08	1.67758	9.4367	88.1143	6.17796011207649e-21	3.9078e-19	Rv1472	echA12	enoyl-CoA hydratase/isomerase superfamily
MT1519	459.68	283.87	724.128	498.503	0.733897858284975	8.94144	17.2532	3.27152963856899e-05	0.000292967	Rv1473	Rv1473	Probable macrolide-transport ATP-binding protein ABC transporter
MT1520	36.0049	30.8835	61.5134	36.3822	0.505606366609586	5.36807	4.92415	0.0264837790085052	0.0769226	Rv1473A	Rv1473A	possible transcription regulatory protein
MT1521	99.111	64.8184	75.1961	58.1384	-0.278218926700489	6.2175	2.22048	0.136191	0.269073	Rv1474c	Rv1474c	transcriptional regulator (TetR/AcrR family)
MT1522	829.868	662.424	726.701	752.021	-0.00422749464872366	9.53694	0.000547985344155677	0.981323956786173	0.990873	Rv1475c	acn	Probable iron-regulated aconitate hydratase Acn
MT1523	193.868	180.447	230.091	218.903	0.262930836767022	7.68604	2.51521	0.112752782127448	0.234387	Rv1476	Rv1476	possible membrane protein
MT1524	195.817	192.513	239.973	213.905	0.222614422322439	7.71879	1.76241	0.184324818310595	0.333273	Rv1477	ripA	peptidoglycan hydrolase
MT1525	140.445	127.603	157.818	132.914	0.113528554004477	7.12726	0.454158261744467	0.500366848314424	0.659161	Rv1478	RipB	peptidoglycan hydrolase/possible invasion protein
MT1526	559.506	604.494	763.363	869.395	0.486275607201798	9.44976	8.07675	0.0044836741706163	0.0190891	Rv1479	moxR1	transcriptional regulator, MoxR homologue
MT1527	287.779	300.097	483.22	435.185	0.641849959001903	8.55718	13.138	0.000289367273397433	0.00196444	Rv1480	Rv1480	conserved hypothetical protein
MT1528	347.571	253.587	381.594	299.833	0.188158479316159	8.32528	1.17802	0.27776	0.443815	Rv1481	Rv1481	probable membrane protein
MT1529	7.53893	5.50171	8.12773	8.22713	0.344204409140756	2.89663	1.41662	0.233961	0.393393	Rv1482c	Rv1482c	conserved hypothetical protein
MT1530	345.686	349.381	241.727	265.584	-0.455778	8.23225	6.93691	0.00844350308138875	0.0317277	Rv1483	fabG1	3-oxoacyl-[ACP] reductase (aka MabA)
MT1531	549.692	434.866	382.237	326.769	-0.468240141476774	8.72622	7.29684	0.00690758642453915	0.0270937	Rv1484	inhA	enoyl-[ACP] reductase
MT1532	152.663	103.192	102.094	71.6675	-0.553300217725343	6.74827	9.97222	0.00158919627759435	0.00825678	Rv1485	hemZ	ferrochelatase
MT1533	233.707	287.568	277.688	315.434	0.190951739978168	8.12266	1.25873	0.261891574102403	0.426204	Rv1486c	Rv1486c	conserved hypothetical protein
MT1533.1	49.718	80.9537	88.0601	87.3904	0.464593321678436	6.26034	4.75306	0.0292462411940382	0.0828332	Rv1487	Rv1487	conserved membrane protein
MT1533.2	279.98	365.794	447.96	458.16	0.501126805703041	8.60025	7.57949	0.00590362087014195	0.0240306	Rv1488	Rv1488	Possible exported conserved protein
MT1534	129.917	123.673	160.8	155.462	0.318864652432791	7.15553	3.60735	0.0575246648788539	0.140981	Rv1489	Rv1489	conserved protein
MT1535	99.046	82.5718	164.718	132.731	0.709265519529542	6.90527	16.5869	4.6469851968199e-05	0.000394845	Rv1489A	Rv1489A	conserved protein
MT1536	30.1557	30.9298	23.5061	18.9529	-0.532740552049448	4.70094	4.99234	0.0254598109721135	0.074601	Rv1490	Rv1490	probable membrane protein
MT1537	18.3924	13.6387	16.7232	11.9446	-0.163912360213889	3.93343	0.405305421571854	0.524361957308418	0.678058
MT1538	345.816	369.4	412.117	490.52	0.331188132821257	8.66026	3.58119	0.0584371847136315	0.142919	Rv1491c	Rv1491c	TVP38/TMEM64 family membrane protein
MT1539	108.925	258.441	170.156	430.127	0.689723755759314	7.91909	16.7157	4.34199275977171e-05	0.000373615	Rv1492	mutA	methylmalonyl-CoA mutase, [beta] subunit
MT1540	160.462	260.846	190.095	337.8	0.309148425259153	7.89133	3.43222	0.0639359481405817	0.153024	Rv1493	mutB	methylmalonyl-CoA mutase, [alpha] subunit
MT1541	76.0393	106.289	70.2844	122.98	0.0503092699108003	6.55493	0.0737757095869114	0.785916647086904	0.869795	Rv1494	mazE4	possible antitoxin
MT1542	70.58	111.329	80.9264	138.338	0.256078368633593	6.64988	2.0281	0.154413292656619	0.293998	Rv1495	mazF4	possible toxin
MT1543	74.6095	113.64	82.2713	102.992	-0.00173395812802856	6.54705	8.87338482016276e-05	0.992484146660035	0.995055	Rv1496	Rv1496	possible transport system kinase
MT1545	196.207	318.868	434.746	468.642	0.850861218334876	8.47059	18.6008	1.61152038287985e-05	0.000156632	Rv1497	lipL	esterase
MT1546	183.859	95.7482	208.573	147.845	0.403403012860487	7.31371	4.97966	0.0256470480315183	0.0748032	Rv1498c	Rv1498c	methyltransferase
MT1547	76.9491	68.8869	84.4933	81.3572	0.187562669767942	6.28592	1.04852	0.305847832737722	0.474797	Rv1489A	Rv1498A	dodecin, assembly of twelve monomer contatingflavoproteins
MT1548	13.1931	8.8767	10.4082	9.75068	-0.104744963610915	3.41351	0.141839861490981	0.706458748872462	0.815302	Rv1499	Rv1499	hypothetical protein
MT1549	257.819	221.64	226.992	213.052	-0.120344489772226	7.84539	0.523545720268373	0.469333085276103	0.631429	Rv1500	Rv1500	similarity to B. subtilis glycosyltransferase
MT1550	149.089	114.796	121.214	101.895	-0.235384821499893	6.929	1.84701	0.174131930436886	0.319482	Rv1501	Rv1501	conserved hypothetical protein
MT1551	108.08	110.543	95.1938	96.5926	-0.188890424961304	6.68256	1.1502	0.283506495176028	0.450648	Rv1502	Rv1502	hypothetical protein
MT1553	22.8768	11.1421	12.3962	7.98337	-0.688244	3.77476	6.4508	0.0110902590798103	0.0393892	Rv1505c	Rv1505c	conserved hypothetical protein
MT1554	40.4893	25.2431	29.8212	19.5623	-0.404919732999236	4.85181	3.18872	0.074148097289894	0.172091	Rv1506c	Rv1506c	acyltrehalose-containing glycolipids synthesis
MT1555	212.455	108.786	106.83	68.4376	-0.831387351930174	6.9567	21.0121	4.56397260675394e-06	5.16688e-05	Rv1507c	Rv1507c	hypothetical protein
MT1556	503.614	381.976	296.34	259.185	-0.662317417529867	8.4934	14.096	0.000173712275001807	0.00127956	Rv1508c	Rv1508c	probable membrane protein
MT1557	28.011	39.2054	29.4703	35.9556	-0.0273288597024316	5.05696	0.0156773703936075	0.900357849835348	0.942222	Rv1509	Rv1509	hypothetical protein
MT1558	35.68	38.8356	41.2234	40.0997	0.126759380496402	5.28818	0.356836607165622	0.550268373479962	0.698573
MT1560	15.4028	16.274	20.3486	21.939	0.416357235757655	4.21727	2.88079	0.0896420171268923	0.197689	Rv1510	Rv1510	probable membrane proteinvery similar to
MT1560.1	12.2183	9.0154	10.4666	8.71467	-0.136767857647363	3.35145	0.255864557573616	0.612975601646373	0.749297
MT1561	290.639	242.861	247.633	226.703	-0.165173301521417	7.97766	0.958906	0.327462551242196	0.498449	Rv1511	gmdA	GDP-mannose 4,6 dehydratase
MT1562	210.18	181.741	219.273	147.54	-0.119544205396605	7.56829	0.474853337952652	0.490762838445794	0.651679	Rv1512	epiA	nucleotide sugar epimerase
MT1563	145.254	101.62	130.102	77.4569	-0.274647337997062	6.82922	2.37322	0.123432246423754	0.249304	Rv1513	Rv1513	conserved hypothetical protein
MT1564	45.1036	29.9589	31.283	16.3324	-0.698003716472851	4.94356	9.23461	0.00237483358074227	0.0114573	Rv1514c	Rv1514c	involved in polysaccharide synthesis
MT1565	101.386	67.7773	74.5529	46.0719	-0.499664581908514	6.18087	7.24891	0.00709440086923656	0.0275816	Rv1515c	Rv1515c	conserved hypothetical protein
MT1566	329.113	191.404	175.185	158.327	-0.592122563071553	7.73877	9.31346	0.00227475894346578	0.0111637	Rv1516c	Rv1516c	probable glucosyltransferase
MT1567	6.30411	10.3562	7.36758	5.1191	-0.401267431828375	2.89324	1.41333	0.234504697554583	0.393806	Rv1517	Rv1517	conserved hypothetical protein
MT1568	30.8056	15.4418	17.4249	13.5291	-0.511156232266187	4.27705	3.76158	0.0524428978770657	0.130779	Rv1518	Rv1518	involved in exopolysaccharide synthesis
MT1569	82.2784	65.5581	30.6398	33.8836	-1.18795	5.73347	31.1783	2.3538054872792e-08	4.38314e-07	Rv1519	Rv1519	conserved hypothetical protein
MT1570	228.183	168.103	122.501	125.418	-0.659966764221901	7.33232	13.0089	0.00031001949029849	0.00207815	Rv1520	Rv1520	glycosyltransferase
MT1571	4.15941	2.45034	4.79477	4.57063	0.543851613969487	2.03073	2.97012	0.0848154668045398	0.190847
MT1572	407.102	420.071	405.392	489.179	0.106957969191784	8.75003	0.371933477375322	0.541952239052111	0.691983	Rv1521	fadD25	acyl-CoA synthase
MT1573	276.081	257.424	348.44	300.138	0.278620273948173	8.20764	2.61196	0.10606	0.224456	Rv1522c	mmpL12	conserved large membrane protein
MT1574	155.523	119.835	130.628	123.102	-0.106462232710288	7.04849	0.374319996085205	0.540658865422198	0.69069	Rv1523	Rv1523	possible methyl-sterol transferase
MT1575	81.5635	54.7859	64.8464	46.011	-0.291604045798532	5.95189	2.42837	0.119156970831573	0.242513	Rv1524	Rv1524	possible rhamnosyl/glycosyl transferase
MT1576	61.4813	51.3184	36.1362	34.9805	-0.659668920454276	5.52644	10.3937	0.00126446251586942	0.00686496	Rv1525	wbbl2	dTDP-rhamnosyl transferase
MT1577	45.2336	33.7037	38.2412	32.2991	-0.152119473598339	5.22774	0.513579277123643	0.473593505977239	0.635465	Rv1526c	Rv1526c	possible rhamnosyl/glycosyl transferase
MT1578.1	4.9393	3.69863	5.78881	4.0831	0.186566038721891	2.24194	0.386570247164609	0.534107757432183	0.686457
MT1579	9.1637	11.4657	113.496	133.401	3.58269	6.06524	290.188	4.52532174577156e-65	2.5762e-62	Rv1528c	papA4	PKS-associated protein, unknown function
MT1580	169.821	117.801	140.92	133.584	-0.0440554582380775	7.13575	0.0588916146176643	0.808256	0.88312	Rv1529	fadD24	acyl-CoA synthase
MT1581	29.1159	25.8904	23.6815	23.2188	-0.227327	4.67738	0.953761583802802	0.328763663189859	0.499475	Rv1530	adh	alcohol dehydrogenase (Zn)
MT1582	91.767	83.7276	84.0255	83.5511	-0.0649749550915607	6.42421	0.125515224639285	0.723128096297037	0.828056	Rv1531	Rv1531	conserved hypothetical protein
MT1583	29.1159	35.4143	29.5288	41.5013	0.126169107897931	5.0878	0.331092335926909	0.565017	0.709386	Rv1532c	Rv1532c	conserved hypothetical protein
MT1585	181.389	107.306	131.505	107.989	-0.228117503728729	7.04592	1.56083	0.211544382087326	0.367162	Rv1534	Rv1534	transcriptional regulator (TetR/AcrR family)
MT1585.1	3268.45	2190.05	1274.06	999.505	-1.24546	10.9167	61.26	5.00129820668552e-15	2.05466e-13
MT1586	967.258	563.393	392.236	298.31	-1.10995	9.11737	35.9058	2.07095351912346e-09	4.82617e-08	Rv1535	Rv1535	predicted to have nucleoid associated protein homology
MT1587	521.161	379.387	408.433	347.429	-0.239343	8.6942	1.85143	0.173617	0.318831	Rv1536	ileS	isoleucyl-tRNA synthase
MT1589	33.1453	31.1609	33.8558	36.4431	0.128789312586865	5.07723	0.345272890570627	0.556801307737214	0.703505	Rv1537	dinX	probable DNA-damage-inducible protein
MT1590	66.3556	70.9674	64.8464	63.1966	-0.100510319296597	6.05441	0.293676487910744	0.587874125838963	0.728299	Rv1538c	ansA	L-asparaginase
MT1591	224.023	298.988	216.583	330.182	0.0475969057800528	8.06376	0.0764017574010865	0.782234192008818	0.867094	Rv1539	lspA	lipoprotein signal peptidase
MT1592	130.697	190.063	159.748	239.013	0.310222913491598	7.49187	3.48449	0.0619464703480657	0.149248	Rv1540	Rv1540	RNA pseudouridine synthase
MT1593	51.5377	37.9572	24.3247	26.8753	-0.790016168752868	5.14078	11.4224	0.000725627303130098	0.00431159	Rv1541c	lprI	lipoprotein
MT1594	31.3256	26.5376	10.2912	17.0027	-1.11643	4.41988	14.8407	0.000116985371596191	0.000894792	Rv1542c	glbN	hemoglobin-like, oxygen carrier
MT1595	250.28	154.926	185.008	189.407	-0.073243395754915	7.60731	0.134303997989036	0.714010590475728	0.820217	Rv1543	Rv1543	possible fatty acyl CoA reductase
MT1596	188.408	126.724	138.698	122.31	-0.246828930272027	7.17126	1.89724	0.168388073339552	0.312105	Rv1544	Rv1544	probable ketoacyl reductase
MT1596.1	59.2066	46.7876	62.449	49.4847	0.0788719855219663	5.77044	0.162402061591547	0.686954557405585	0.80279	Rv1545	Rv1545	hypothetical protein
MT1597	67.8504	49.053	57.6542	45.4625	-0.172541791186658	5.78415	0.778607706012835	0.377567	0.548926	Rv1546	Rv1546	conserved hypothetical protein
MT1598	909.546	619.15	758.334	579.312	-0.179174954594611	9.48519	1.08089	0.298498203099455	0.466843	Rv1547	dnaE1	DNA polymerase III, [alpha] subunit
MT1599	59.7915	64.0325	59.233	56.3711	-0.0990139263098702	5.9063	0.269861271370686	0.603424847793157	0.742777	Rv1548c	PPE21	PPE-family protein
MT1600	11.5034	8.69177	10.2912	8.53184	-0.0941903857983418	3.30133	0.119886717159581	0.729157386384599	0.831623	Rv1550	fadD11	acyl-CoA synthase, N-term
MT1601	14.103	10.0325	9.64802	8.53184	-0.391687289044828	3.4171	2.05222	0.151984778951775	0.291322	Rv1551	plsB1	glycerol-3-phosphate acyltransferase
MT1603	2.72961	3.19006	6.43201	8.22713	1.30374	2.39092	18.5821	1.6274124903149e-05	0.000157792	Rv1552	frdA	fumarate reductase flavoprotein subunit
MT1604	2.92459	2.77397	5.14561	5.24099	0.866418870969038	2.04384	8.09198	0.00444614569362537	0.0189496	Rv1553	frdB	fumarate reductase iron sulphur protein
MT1606	2.92459	2.40411	4.44394	2.74238	0.402343113580241	1.69336	1.57763	0.209102	0.364093	Rv1555	FrdD	probable fumarate reductase
MT1607	71.6199	51.1335	98.8191	83.0636	0.581883562813934	6.25273	9.75192	0.00179135683285677	0.009152	Rv1556	Rv1556	putative transcriptional regulator
MT1608	70.645	56.7739	266.929	321.041	2.20908	7.48324	125.034	5.00296681734946e-29	4.74686e-27	Rv1557	mmpL6	conserved large membrane protein
MT1609	221.944	184.238	254.942	232.066	0.266471945571295	7.80348	2.53317	0.111475866800059	0.232478	Rv1558	Rv1558	deazaflavin-dependent nitroreductases homolog
MT1610	735.826	654.056	720.327	680.902	0.0136670246237879	9.44685	0.00640567848751061	0.936209035381743	0.959813	Rv1559	ilvA	threonine deaminase
MT1611	66.8106	45.5856	53.6196	52.1661	-0.0617462141683317	5.77195	0.0858884465682195	0.769470705215703	0.859598	Rv1560	vapB11	possible antitoxin
MT1612	72.6597	40.315	64.3201	63.3184	0.236368989648417	5.91264	1.08089	0.298498327709865	0.466843	Rv1561	vapC11	possible toxin
MT1613	61.0264	52.7979	59.233	43.0249	-0.168750526932207	5.75838	0.717530295231303	0.396955213861338	0.566774	Rv1562c	treZ	maltooligosyltrehalose trehalohydrolase
MT1614	99.9559	67.1301	87.6508	62.6481	-0.144834109030905	6.31188	0.626504248287837	0.428640485433518	0.597063	Rv1563c	treY	putative [alpha]-amylase
MT1615	221.619	162.231	228.22	171.673	0.0619412825239428	7.61497	0.140499944469255	0.707785	0.816596	Rv1564c	treX	probable glycogen debranching enzyme
MT1616	581.798	477.169	519.765	465.96	-0.0984800780827765	8.99797	0.314052856583174	0.575203774058173	0.717863	Rv1565c	Rv1565c	putative acyl-transferase
MT1617	377.207	514.525	438.839	493.019	0.0781540616754354	8.83296	0.192548035233528	0.660804317392074	0.786608	Rv1566c	RipD	probable peptidoglycan
MT1618	106.975	65.0496	71.9216	48.9362	-0.492322210295725	6.19607	7.08833	0.00775875308806885	0.0295307	Rv1567c	Rv1567c	hypothetical protein
MT1619	130.891	113.502	99.8716	81.601	-0.433058251513583	6.73578	5.99444	0.0143510330991248	0.0481388	Rv1568	bioA	adenosylmethionine-8-amino-7-oxononanoate
MT1620	69.9301	99.2619	72.5648	76.4209	-0.163350069596747	6.31609	0.707511206586098	0.400271271140335	0.569265	Rv1569	bioF1	8-amino-7-oxononanoate synthase
MT1621	22.1619	39.7602	33.9727	32.5429	0.157815108271784	5.01107	0.374121744377959	0.540766091883854	0.69069	Rv1570	bioD	dethiobiotin synthase
MT1622	7.27897	11.0496	8.77093	5.5457	-0.364093608745651	3.05315	1.17416	0.278548294320333	0.444718	Rv1571	Rv1571	conserved hypothetical protein
MT1622.1	7.084	12.3904	17.308	17.4293	0.877144357351514	3.77319	9.06208	0.00260964934429022	0.0124395	Rv1572c	Rv1572c	conserved hypothetical protein
MT1623	50.1079	60.1951	71.6292	79.2852	0.455893215932909	6.03161	6.00218	0.0142881972061865	0.0479684	Rv1588c	Rv1588c	partial REP13E12 repeat protein
MT1624	307.796	245.543	234.885	179.595	-0.420570353537329	7.91924	6.31572	0.0119671917905612	0.0417855	Rv1589	bioB	biotin synthase
MT1625	111.264	74.8509	58.1805	38.7589	-0.942267566984663	6.14706	25.6147	4.16851244669552e-07	5.93269e-06	Rv1590	Rv1590	conserved hypothetical protein
MT1626	83.7082	63.4314	43.9131	31.8116	-0.962807448099116	5.80289	24.0991	9.15049130567907e-07	1.21145e-05	Rv1591	Rv1591	probable transmembrane protein
MT1627	94.4966	35.553	168.928	103.235	1.18428	6.6529	31.3571	2.14666845456822e-08	4.03513e-07
MT1628	747.914	391.823	1907.38	1367.41	1.57673	10.1082	74.5311	5.96914021810741e-18	3.04962e-16	Rv1592c	Rv1592c	conserved hypothetical protein
MT1629	201.017	366.904	238.16	552.376	0.418334364512928	8.40828	5.29363	0.0214035827499833	0.0655693	Rv1593c	Rv1593c	conserved hypothetical protein
MT1630	2281.83	3334.91	3666.77	5002.46	0.634628159987435	11.8024	21.6203	3.32309971297059e-06	3.83842e-05	Rv1594	nadA	quinolinate synthase
MT1631	991.175	2317.98	2305.64	2837.69	0.754600760004631	11.0452	13.1799	0.000282967367040892	0.00193086	Rv1595	nadB	L-aspartate oxidase
MT1632	633.79	840.143	842.243	919.55	0.270132923992096	9.66009	2.45297	0.117302878432246	0.240459	Rv1596	nadC	nicotinate-nucleotide pyrophosphatase
MT1633	343.931	315.262	338.85	356.936	0.0788921459107016	8.40451	0.200803923764241	0.654072722970879	0.780851	Rv1597	Rv1597	hypothetical protein
MT1634	117.503	135.832	133.26	154.609	0.184172534789922	7.08127	1.22068	0.269226296653781	0.435358	Rv1598c	Rv1598c	conserved hypothetical protein
MT1635	248.2	561.22	390.131	848.187	0.624000538850016	9.00018	12.5906	0.000387687875013254	0.00252854	Rv1599	hisD	histidinol dehydrogenase
MT1636	411.587	493.304	400.013	598.265	0.118851784860256	8.89454	0.429936306345638	0.51202	0.66767	Rv1600	hisC1	histidinol-phosphate aminotransferase
MT1637	195.882	192.282	177.29	233.59	0.0689901914205253	7.64292	0.149537486442057	0.698978	0.811718	Rv1601	hisB	imidazole glycerol-phosphate dehydratase
MT1638	54.9822	86.8252	69.2319	79.5899	0.101228602714523	6.18565	0.262385894351823	0.608485731367075	0.745782	Rv1602	hisH	amidotransferase
MT1639	118.218	139.068	127.412	158.022	0.146390140105473	7.08531	0.765942	0.381475292784514	0.552759	Rv1603	hisA	phosphoribosylformimino-5-aminoimidazole
MT1640	103.075	136.156	103.146	135.717	-0.00185217742972682	6.90266	0.000114204228941261	0.991473458932321	0.994561	Rv1604	impA	impA, inositol monophosphatasemonophosphtase
MT1641	66.0957	114.842	75.7223	107.867	0.0511780198357532	6.51203	0.0754205106558459	0.783602091061769	0.867886	Rv1605	hisF	imidazole glycerol-phosphate synthase
MT1641.1	47.7033	68.3321	56.8941	57.1024	-0.00443240762635468	5.84895	0.000457179715368738	0.982941122631836	0.991902	Rv1606	hisI	probable phosphoribosyl-AMP 1,6 cyclohydrolase
MT1642	113.864	91.8646	66.1913	60.9417	-0.687349552090678	6.3807	13.6277	0.000222876704518489	0.00157197	Rv1607	chaA	putative calcium/proton antiporter
MT1643	188.538	141.149	177.582	166.676	0.0766670263097662	7.39734	0.197465651912466	0.656774322672132	0.783606	Rv1608c	bcpB	probable bacterioferritin comigratory protein
MT1644	350.95	379.017	392.119	417.816	0.150301992763176	8.58905	0.752414	0.385712897634907	0.556706	Rv1609	trpE	anthranilate synthase component I
MT1645	47.3133	69.5804	73.325	62.5871	0.237341722465752	5.9848	1.15336	0.282847853387069	0.450319	Rv1610	Rv1610	possible conserved membrane protein
MT1646	924.429	997.011	764.708	811.439	-0.285393630360795	9.77234	2.93314	0.086778763008868	0.193436	Rv1611	trpC	indole-3-glycerol phosphate synthase
MT1647	801.402	515.034	479.243	367.052	-0.615324	9.0789	11.6961	0.000626312744340945	0.00380466	Rv1612	trpB	tryptophan synthase [beta] chain
MT1648	106.78	105.226	79.64	53.7506	-0.695237717259392	6.43417	11.8481	0.000577200176788563	0.0035496	Rv1613	trpA	tryptophan synthase [alpha] chain
MT1649	562.495	372.452	335.751	213.966	-0.771985675920093	8.53632	19.6405	9.3465701992893e-06	9.82746e-05	Rv1614	lgt	prolipoprotein diacylglyceryl transferase
MT1650	25.4114	12.6678	13.2733	10.6648	-0.598044250555575	3.96271	4.57352	0.0324697079185448	0.0901057
MT1651	351.99	351.878	429.658	477.966	0.364818302916297	8.65457	4.34988	0.0370115076717316	0.100144	Rv1615	rv1615	probable membrane protein
MT1652	120.428	87.7499	117.998	133.219	0.286652091184509	6.84479	2.0622	0.150992283066894	0.290118	Rv1616	Rv1616	conserved hypothetical protein
MT1653	752.854	598.207	835.109	825.577	0.307185954547649	9.55658	3.07894	0.0793124255069818	0.181644	Rv1617	pykA	pyruvate kinase
MT1654	346.921	212.625	335.868	216.099	-0.0117504614992526	8.1188	0.00475962993439083	0.944997522644953	0.965414	Rv1618	tesB1	thioesterase II
MT1655	62.7161	63.154	87.8847	75.5068	0.371940444150581	6.17841	3.94159	0.047106308444092	0.120797	Rv1619	Rv1619	conserved hypothetical protein
MT1656	78.1839	196.582	219.682	253.335	0.924905463565365	7.54749	14.6884	0.000126827055811935	0.000966359	Rv1620c	cydC	ABC transporter
MT1657	175.28	333.015	331.775	430.005	0.643594984922021	8.31127	11.0565	0.000883751670817691	0.00508189	Rv1621c	cydD	ABC transporter
MT1658	216.029	390.529	455.211	551.401	0.785668600498051	8.65612	16.0247	6.25206798037578e-05	0.000513701	Rv1622c	cydB	cytochrome d ubiquinol oxidase subunit II
MT1659	698.131	1252.91	1352.48	1853.36	0.759211474673082	10.3324	19.2958	1.11950335044593e-05	0.00011439	Rv1623c	cycA	cytochrome bd-II oxidase subunit I
MT1660	83.2532	76.9777	50.2282	65.0858	-0.484186011258289	6.10854	5.96069	0.0146283536531606	0.0488224	Rv1624c	Rv1624c	possible membrane protein
MT1661	291.549	455.624	254.649	485.279	-0.0515936463125769	8.53879	0.0834951178895835	0.772615647391009	0.861497	Rv1625c	cya	C-term similar eukaryotic adenylate/guanylate cyclases
MT1662	286.934	274.669	215.18	222.803	-0.358482660205053	7.96586	4.54233	0.0330665576480979	0.0913169	Rv1626	Rv1626	two-component response regulator
MT1663	358.814	512.537	404.808	537.201	0.120789054842125	8.82485	0.481977332383735	0.487528028871751	0.648248	Rv1627c	Rv1627c	Probable nonspecific lipid-transfer protein
MT1664	209.4	327.883	299.966	501.733	0.566321893886142	8.38743	10.5283	0.00117560681850939	0.00643516	Rv1628c	Rv1628c	conserved hypothetical protein
MT1665	303.702	337.685	277.512	318.42	-0.107383111601002	8.27356	0.39258	0.530946463718219	0.682964	Rv1629	polA	DNA polymerase I
MT1666	1957.26	1381.76	1526.78	1503.25	-0.118388062105889	10.637	0.470234258879827	0.492879418252952	0.653398	Rv1630	rpsA	30S ribosomal protein S1
MT1667	328.399	215.584	280.143	212.138	-0.126437511512879	8.01771	0.55445	0.456505261461328	0.619609	Rv1631	coaE	probable dephospho-CoA kinase CoaE
MT1668	133.491	92.3732	95.6031	81.2353	-0.333814319605813	6.65501	3.27292	0.0704319651859269	0.165783	Rv1632c	Rv1632c	hypothetical protein
MT1669	249.11	364.869	317.391	496.066	0.396464032311807	8.47969	5.19198	0.0226913141403092	0.0684001	Rv1633	uvrB	excinuclease ABC subunit B
MT1670	111.004	157.192	139.984	170.21	0.224029202903583	7.17714	1.6928	0.193231728492768	0.344378	Rv1634	Rv1634	probable drug efflux membrane protein
MT1671	200.367	251.137	207.345	282.282	0.109254685042386	7.87899	0.430686378958683	0.511652344631706	0.667409	Rv1635c	Rv1635c	Probable mannosyltransferase. Probable conserved transmembrane protein.
MT1672	415.226	570.467	338.441	441.279	-0.332789	8.78623	3.65197	0.0560028074331117	0.13793	Rv1636	TB15.3	iron regulated universal stress protein family protein
MT1673	206.606	204.95	232.43	248.216	0.223204482839333	7.80193	1.7908	0.180829	0.328593	Rv1637c	Rv1637c	conserved hypothetical protein
MT1675	618.648	795.343	742.605	976.53	0.279798746635319	9.6136	2.77974	0.0954635568381159	0.207202	Rv1638	uvrA	excinuclease ABC subunit A
MT1676	126.667	104.024	200.211	133.523	0.510548547792065	7.14168	8.54441	0.00346584513844053	0.0156769	Rv1638A	Rv1638A	conserved hypothetical protein
MT1677	454.416	489.837	768.45	641.168	0.573067149726035	9.20109	9.86714	0.00168256775667586	0.00868528	Rv1639c	Rv1639c	conserved hypothetical protein
MT1678	213.495	144.847	242.311	187.335	0.276689080583012	7.62273	2.728	0.098602462745556	0.212855	Rv1640c	lysX	lysyl tRNA synthase 2
MT1679	865.548	812.542	855.458	1011.45	0.149569241748856	9.79174	0.735722	0.391034588707622	0.56154	Rv1641	infC	initiation factor IF-3
MT1680	168.066	157.931	169.571	200.986	0.180723038163045	7.44498	1.11138	0.291781564304297	0.459536	Rv1642	rpmI	50S ribosomal protein L35
MT1681	518.887	463.854	587.126	630.137	0.310179712550871	9.10356	3.04356	0.0810580531427731	0.18437	Rv1643	rplT	50S ribosomal protein L20
MT1682	257.234	316.417	401.942	371.866	0.438134523076136	8.39652	5.61117	0.0178463276215787	0.0573529	Rv1644	tsnR	putative 23S rRNA methyltransferase
MT1683	152.273	181.186	175.477	169.784	0.0550273964424526	7.4077	0.103989531510763	0.747093571898636	0.841008	Rv1645c	Rv1645c	conserved hypothetical protein
MT1684	376.232	563.116	323.238	407.091	-0.343798078823771	8.70583	3.73658	0.0532333763055128	0.132419	Rv1646	PE17	PE-family protein
MT1685	367.393	421.69	419.894	441.706	0.129723074101033	8.68926	0.558484363568084	0.454871560859618	0.618024	Rv1647	Rv1647	possible adenylyl cyclase
MT1686	251.319	234.909	342.709	278.565	0.346653495095472	8.11365	4.00637	0.0453285387107587	0.117297	Rv1648	Rv1648	probable transmembrane protein
MT1687	166.182	136.387	155.07	131.634	-0.0755174196685601	7.20383	0.202397478077266	0.652792590674465	0.780257	Rv1649	pheS	phenylalanyl-tRNA synthase [alpha] subunit
MT1688	367.588	261.077	341.014	196.964	-0.257045266806619	8.18865	2.11831	0.145546893074462	0.281966	Rv1650	pheT	phenylalanyl-tRNA synthase [beta] subunit
MT1689	79.4838	170.414	122.501	141.75	0.176225980922143	7.00766	0.654892154512936	0.418369017736961	0.586629	Rv1651c	PE_PGRS30	PE_PGRS-family protein
MT1690	181.064	318.405	271.431	169.662	-0.162364435028963	7.87827	0.323919	0.569261910684118	0.712919	Rv1652	argC	N-acetyl-[gamma]-glutamyl-phosphate reductase
MT1691	159.163	352.017	317.625	224.692	0.173612161162924	8.04178	0.318807617350558	0.572325105870757	0.715406	Rv1653	argJ	probable glutamate N-actyltransferase
MT1692	140.9	211.839	195.182	124.199	-0.150331774850194	7.39376	0.353257208557011	0.552275069414498	0.700228	Rv1654	argB	acetylglutamate kinase
MT1693	117.828	206.291	189.394	126.698	-0.0100769769631048	7.32368	0.00137009735635729	0.970473184267836	0.983304	Rv1655	argD	acetylornithine aminotransferase
MT1694	170.666	185.255	168.811	107.867	-0.397565677577417	7.30629	3.76455	0.0523499763221581	0.130699	Rv1656	argF	ornithine carbamoyltransferase
MT1695	16.9626	41.6095	32.394	24.8642	0.0873400875805476	4.86351	0.0634610625039898	0.801106925755501	0.877796	Rv1657	argR	arginine repressor
MT1696	277.381	339.95	333.471	236.027	-0.130403080427161	8.21351	0.382281059776915	0.536384972984662	0.687961	Rv1658	argG	arginosuccinate synthase
MT1697	161.242	169.859	155.655	94.3987	-0.448484	7.18401	4.60618	0.0318569318558138	0.0889904	Rv1659	argH	arginosuccinate lyase
MT1698	227.533	235.418	256.111	272.227	0.190169056643358	7.95381	1.28925	0.256186704568216	0.418403	Rv1660	pks10	polyketide synthase (chalcone synthase-like)
MT1701	59.2066	89.6917	93.4981	78.5539	0.232007560222098	6.32853	1.06064	0.303070114160379	0.471035	Rv1661	pks7	polyketide synthase
MT1702	34.5101	45.0308	42.2174	41.806	0.0901211925193109	5.35809	0.166734292233564	0.683030605248287	0.799142	Rv1662	pks8	polyketide synthase
MT1703	44.1938	37.7722	45.3165	33.2742	-0.0729761925883501	5.33084	0.118819	0.730318647739826	0.832074	Rv1663	pks17	polyketide synthase
MT1704	52.9675	42.1181	66.9514	62.6481	0.455406227702646	5.8143	5.34724	0.020755081918813	0.0640658	Rv1664	pks9	polyketide synthase
MT1705	44.2587	54.3236	47.48	57.8337	0.0957720062410033	5.67508	0.235023	0.627824157934424	0.762071	Rv1665	pks11	polyketide synthase (chalcone synthase-like)
MT1706	102.945	68.5633	69.992	52.3489	-0.473378936175543	6.2009	6.57992	0.0103135702148109	0.0374313	Rv1666c	cyp139	Probable cytochrome p450
MT1707	118.998	100.649	98.8776	86.2935	-0.244608984220609	6.66269	1.88408	0.169870842947546	0.314123	Rv1667c/Rv1668c	Rv1667c/Rv1668c	Probable first part of macrolide-transport ATP-binding protein ABC transporter
MT1708	28.336	22.2842	37.4226	39.1246	0.606994	4.99495	7.20565	0.00726745337958154	0.0280976	Rv1670	Rv1670	conserved hypothetical protein
MT1709	13.0632	14.2859	21.7519	21.6953	0.668043170543851	4.15434	7.09839	0.00771531975749813	0.0293935	Rv1671	Rv1671	Probable membrane protein
MT1710	116.659	157.839	106.771	148.149	-0.109443433445276	7.04965	0.422512631023043	0.515685945568736	0.670914	Rv1672c	Rv1672c	probable conserved integral membrane transportprotein
MT1711	27.8811	19.6027	29.0025	22.7922	0.136633440829866	4.63911	0.334826	0.562830980184037	0.707577	Rv1673c	Rv1673c	conserved hypothetical protein
MT1712	6.04415	6.70376	10.2327	10.6648	0.712902674288133	3.09064	6.62978	0.0100287378054063	0.0365984	Rv1674c	Rv1674c	putative transcriptional regulator
MT1714	13.5181	13.7311	11.2268	9.68973	-0.385530877009745	3.60423	2.10708	0.146618465808172	0.283667	Rv1675c	cmr	probable transcriptional regulator
MT1715	319.625	278.784	261.491	290.083	-0.116001832196811	8.16794	0.425982098251779	0.513967086170866	0.669552	Rv1676	Rv1676	preduicted peroxiredoxin
MT1716	306.432	262.695	288.213	240.415	-0.108138139108676	8.10091	0.406994	0.523499356356844	0.67776	Rv1677	dsbF	highly similar to C-term Mpt53
MT1717	33.8602	25.7055	31.5753	28.8864	0.0335621505186608	4.91209	0.0219043635873177	0.882341798851551	0.931919
MT1718	106.585	124.413	82.9145	74.227	-0.554006646160184	6.60236	8.55829	0.00343952690201964	0.0156289	Rv1678	Rv1678	probably integral membrane protein
MT1719	91.3121	85.6694	61.6889	53.9944	-0.615815672184047	6.19545	11.1507	0.000840010896376336	0.00488678	Rv1679	fadE16	acyl-CoA dehydrogenase
MT1720	83.5782	62.5992	58.1805	41.867	-0.551218503207279	5.94634	8.64872	0.00327290438541825	0.0150607	Rv1680	Rv1680	hypothetical protein
MT1721	64.9908	46.7876	42.3928	24.5595	-0.771028687301624	5.4851	13.0802	0.000298432163287975	0.0020191	Rv1681	moeX	weak similarity to E. coli MoaA
MT1722	90.0773	69.2105	33.0372	25.3518	-1.44776	5.7691	52.3033	4.75571959544683e-13	1.63375e-11	Rv1682	Rv1682	Probable coiled-coil structural protein
MT1723	732.576	825.949	662.205	864.641	-0.039731163567345	9.59145	0.0537386588980553	0.816680927584302	0.889242	Rv1683	Rv1683	Possible bifunctional enzyme; long-chain acyl-CoA synthase and lipase.
MT1724	40.9442	31.3921	38.3582	35.3462	0.0383771560684402	5.19424	0.0316855526885504	0.85872	0.916197	Rv1684	Rv1684	conserved hypothetical protein
MT1725	53.0975	121.685	15.7292	80.9306	-1.15384	6.08802	19.8135	8.53767019092191e-06	9.0727e-05	Rv1685c	Rv1685c	conserved hypothetical protein
MT1726	110.744	277.582	29.2364	158.083	-1.3563	7.1708	31.0621	2.49903797268417e-08	4.61049e-07	Rv1686c	Rv1686c	Probable conserved integral membrane protein ABC transporter
MT1727	260.873	554.424	42.042	286.487	-1.78654	8.16053	31.1513	2.38679464360886e-08	4.4239e-07	Rv1687c	Rv1687c	Probable conserved integral membrane protein ABC transporter
MT1727.1	13.4531	29.3116	24.6755	22.6703	0.242156806021971	4.50277	0.604869321404777	0.436726167332411	0.604902	Rv1688	mpg	probable 3-methylpurine DNA glycosylase
MT1728	203.031	169.859	142.147	106.282	-0.595177381242657	7.28024	12.4165	0.000425554849408233	0.00272205	Rv1689	tyrS	tyrosyl-tRNA synthase
MT1729	62.0662	87.6112	309.614	225.484	1.83885	7.42033	66.0174	4.46960957046993e-16	2.02402e-14	Rv1690	lprJ	lipoprotein
MT1730	51.8627	66.3441	132.09	96.227	0.940954050033269	6.43865	17.7423	2.52940545647187e-05	0.000231717	Rv1691	Rv1691	conserved hypothetical protein
MT1731	95.0166	105.688	131.739	110.975	0.270468407721695	6.79402	2.15877	0.141758274177584	0.277595	Rv1692	Rv1692	glycerol 3-phosphate phosphatase
MT1732	50.2379	55.5256	46.5444	45.2188	-0.203634990337995	5.62944	1.06915	0.301137888617452	0.468763	Rv1693	Rv1693	hypothetical protein
MT1733	64.4709	82.1557	81.3357	75.9943	0.110258650427058	6.25006	0.319789	0.571734678680363	0.715	Rv1694	tlyA	cytotoxin/hemolysin homologue
MT1734	90.4022	92.3732	95.7201	77.8835	-0.0819504634913927	6.47916	0.185909049869295	0.666343516975892	0.788648	Rv1695	ppnK	inorganic polyphospahte/ATP-NAD kinase
MT1735	116.788	106.012	112.502	88.6702	-0.155737395584053	6.72935	0.768274498008651	0.380751	0.551944	Rv1696	recN	recombination and DNA repair
MT1736	505.239	444.205	411.298	443.229	-0.149904134667047	8.81731	0.697282327240728	0.403698381179962	0.572097	Rv1697	Rv1697	conserved hypothetical protein
MT1737	188.083	165.837	147.936	159.85	-0.199508519421314	7.371	1.31491	0.251507499491071	0.413302	Rv1698	Rv1698	probable Channel-forming Outer Membrane Proteins
MT1738	1049.73	1144.91	1046.37	1096.71	-0.0333522498329091	10.0829	0.0411024878086081	0.839340222780442	0.903016	Rv1699	pyrG	CTP synthase
MT1739	205.176	191.728	182.669	140.288	-0.309037	7.4925	3.24379	0.0716948051886487	0.167667	Rv1700	Rv1700	NUDIX hydrolase
MT1740	121.143	146.697	131.739	102.992	-0.194974729481517	6.97464	0.991390732298129	0.319402704775952	0.491057	Rv1701	Rv1701	Probable integrase/recombinase
MT1741	23.2667	24.8733	23.74	30.1662	0.155276	4.67943	0.438027970519673	0.508075808907663	0.664702	Rv1702c	Rv1702c	hypothetical protein
MT1743	528.375	413.645	548.592	498.199	0.161238480973146	8.95798	0.826231945972268	0.363364369022389	0.532943	Rv1703c	Rv1703c	Probable catechol-O-methyltransferase
MT1744	336.003	181.002	158.461	113.717	-0.878209	7.62488	24.4706	7.54538626077475e-07	1.01964e-05	Rv1704c	cycA	transport of D-alanine, D-serine and glycine
MT1745	84.618	75.3595	26.7806	21.939	-1.7194	5.70878	70.3133	5.05953640920751e-17	2.40027e-15	Rv1705c	PPE22	PPE-family protein
MT1746	66.3556	79.0581	22.9798	28.0332	-1.51238	5.62207	56.8992	4.58728323476952e-14	1.73351e-12	Rv1706c	PPE23	PPE-family protein
MT1746.1	6.30411	5.54794	4.0931	6.277	-0.208697855711216	2.50185	0.441414909812902	0.50644	0.663652
MT1748	769.101	484.566	391.125	319.274	-0.788852971160821	8.93992	18.2692	1.91784806319453e-05	0.000180677	Rv1707	Rv1707	putative sulfate transporter
MT1749	172.031	157.284	135.306	120.665	-0.364389638417055	7.19412	4.70712	0.030037902431164	0.0846542	Rv1708	Rv1708	Putative initiation inhibitor protein
MT1750	148.959	80.8612	81.5112	63.0747	-0.615413777666053	6.54985	9.8524	0.00169610011391167	0.0087438	Rv1709	scpA	possible segregation and condensation protein
MT1751	99.046	88.767	93.4981	79.1024	-0.124715709839183	6.49528	0.461803518007095	0.496782300735191	0.657045	Rv1710	scpB	possible segregation and condensation protein
MT1751.1	78.7039	54.1386	59.0576	41.9888	-0.390600047379214	5.87218	4.17241	0.0410873441989073	0.108865	Rv1711	Rv1711	conserved hypothetical protein
MT1752	80.1987	59.964	46.4274	38.4542	-0.714974288016127	5.81682	13.366	0.000256228322490711	0.00177577	Rv1712	cmk	cytidylate kinase
MT1753	109.315	86.5016	82.2713	53.2631	-0.553956418726357	6.37413	8.65263	0.00326589066205347	0.0150458	Rv1713	engA	probable GTP binding protein
MT1753.1	7.34396	6.70376	6.49049	4.50969	-0.371766497430748	2.67296	1.58909	0.207455765137551	0.362384	Rv1714	Rv1714	probable oxidoreductase
MT1754	7.34396	3.83732	5.49645	2.37673	-0.540197833804061	2.28051	3.12773	0.0769707964542137	0.177608	Rv1715	fadB3	3-hydroxyacyl-CoA dehydrogenase
MT1755	16.7026	5.9178	8.71245	5.66758	-0.520150901616662	3.22111	2.87635	0.0898897095830545	0.198016	Rv1716	Rv1716	conserved hypothetical protein
MT1758	6.10914	6.56506	6.49049	4.8144	-0.179859608977209	2.61226	0.355060050497058	0.551262640163119	0.699167	Rv1719	Rv1719	probable transcriptional regulator
MT1761	12.4782	14.7945	28.8271	26.6315	1.02498	4.37771	16.4844	4.90529903271535e-05	0.000415907	Rv1720c	vapC12	possible toxin
MT1762	16.3777	12.2979	22.1027	20.903	0.598573482427618	4.17123	5.54326	0.0185519930809493	0.0589551	Rv1721c	vapB12	possible anti toxin
MT1763	59.5966	59.0393	84.3763	63.1356	0.299061672539225	6.05848	2.35229	0.125098801676859	0.25165	Rv1722	Rv1722	Possible carboxylase
MT1764	14.493	11.8356	19.0037	10.1163	0.0871418409268176	3.80415	0.0982854347087709	0.753896962383913	0.846276	Rv1723	Rv1723	6-aminohexanoate-dimer hydrolase
MT1765	50.2379	25.4281	34.0897	30.7756	-0.144824	5.13823	0.333601	0.563546350362223	0.708209	Rv1724c	Rv1724c	hypothetical protein
MT1766	32.1705	42.7191	62.2151	83.9777	0.963376	5.79123	23.9913	9.67720201774752e-07	1.27694e-05	Rv1725c	Rv1725c	conserved hypothetical protein
MT1768	2.98958	3.19006	5.96423	5.30193	0.859300863154002	2.15941	7.89179	0.00496596060445289	0.0207653	Rv1727	Rv1727	conserved hypothetical protein
MT1769	150.844	147.159	113.145	130.05	-0.296232945592823	7.08124	3.01232	0.0826338916414388	0.187215	Rv1728c	Rv1728c	conserved hypothetical protein
MT1770	114.709	84.3287	79.2307	78.0054	-0.323190579613433	6.4785	2.75561	0.0969139523717576	0.209665	Rv1729c	Rv1729c	Possible S-adenosylmethionine-dependent methyltransferase
MT1771	285.83	285.719	202.375	239.806	-0.375199496630277	7.98613	4.76614	0.0290247477254279	0.0822643	Rv1730c	Rv1730c	probable penicillin binding protein
MT1772	715.159	631.587	498.306	431.467	-0.535472660169937	9.1529	9.60846	0.00193682811252681	0.00974528	Rv1731	gabD2	succinate-semialdehyde dehydrogenase
MT1773	155.718	230.332	291.37	424.154	0.892313268385444	8.10593	27.5676	1.51698120931892e-07	2.34331e-06	Rv1732c	Rv1732c	conserved hypothetical protein
MT1774	89.4274	336.159	202.316	586.077	0.987555653609218	8.24615	28.9514	7.42168043638087e-08	1.23231e-06	Rv1733c	Rv1733c	Probable conserved transmembrane protein
MT1775	106.78	412.582	109.11	400.265	-0.00688994228675826	8.00757	0.00166443569413843	0.967457335461718	0.981243
MT1776	11.1784	13.0377	10.1743	14.8088	0.0285323048723958	3.63424	0.0114283954012731	0.914865398887344	0.950897	Rv1735c	Rv1735c	hypothetical membrane protein
MT1777	31.6505	88.9057	45.0826	98.9084	0.326552640328203	6.05054	2.8403	0.0919268979749234	0.20139
MT1778	342.177	1308.07	586.775	1279.29	0.371948342197971	9.7801	3.1756	0.0747456157899082	0.173276	Rv1736c	narX	fused nitrate reductase
MT1779	210.31	819.708	364.871	981.588	0.526092707927653	9.21497	7.46332	0.00629689185109494	0.0251939	Rv1737c	narK2	nitrite extrusion protein
MT1780	174.695	1294.2	419.25	1576.75	0.771645480827752	9.75886	11.6691	0.000635474624005878	0.00384858	Rv1738	Rv1738	possibly interact with ribosome structo=ural prection
MT1781	60.8314	55.5256	53.0349	57.8337	-0.0690577698209673	5.83076	0.123915156272048	0.724826378271092	0.828581	Rv1739c	Rv1739c	Probable sulphate-transport transmembrane protein ABC transporter
MT1782	20.7971	36.2003	22.1612	27.3019	-0.162638380731789	4.7418	0.450380624250219	0.502154257387712	0.659819	Rv1740	vapB34	Possible antitoxin VapB34
MT1783	23.2017	35.1832	23.9154	32.1163	-0.0457079526522856	4.84476	0.0400837987981202	0.841316825735579	0.904654	Rv1741	VapC34	possible toxin
MT1784	28.8559	40.0376	32.0431	38.1495	0.0391076286742679	5.12508	0.0323473141314636	0.857267510136143	0.915383	Rv1742	Rv1742	hypothetical protein
MT1785	210.96	267.596	285.231	392.282	0.493678102496981	8.17558	8.35697	0.00384210468779954	0.017012	Rv1743	pknE	serine-threonine protein kinase
MT1786	8.31882	6.42636	6.84132	6.21606	-0.165397786198282	2.81882	0.336288437442395	0.561979481289329	0.707356	Rv1744c	Rv1744c	Probable membrane protein
MT1787	21.512	16.4589	16.2555	16.0277	-0.221176	4.14303	0.747485222623389	0.387273593995785	0.558259	Rv1745c	idi	probable isoprenyl-diphosphate delta isomerase
MT1788	217.849	155.712	127.763	109.634	-0.638210451170717	7.25592	13.4107	0.000250187023939583	0.00173693	Rv1746	pknF	serine-threonine protein kinase
MT1789	885.825	747.446	710.796	663.716	-0.244491053289614	9.55469	2.07884	0.149353996659319	0.287803	Rv1747	Rv1747	probable conserved transmembrane ATP-binding protein ABC transporter
MT1790	5.58921	2.91267	5.20408	3.53462	0.0771311522740112	2.13816	0.0632150408851944	0.801484756694874	0.877796
MT1791	45.7535	49.9315	78.1782	89.889	0.810771509425214	6.04532	19.0155	1.29662429937003e-05	0.000130811	Rv1748	Rv1748	hypothetical protein
MT1792	198.092	193.392	194.773	172.587	-0.0943331996744285	7.56853	0.324614205662186	0.568847782406044	0.712624	Rv1749c	Rv1749c	possible integral membrane protein
MT1793	173.85	119.558	140.92	116.094	-0.172973496562115	7.10543	1.02014	0.312486864041692	0.482008	Rv1750c	fadD1	acyl-CoA synthase
MT1794	554.827	353.219	317.508	234.565	-0.698056605724425	8.51226	15.4676	8.39320398593975e-05	0.000673068	Rv1751	Rv1751	Probable oxidoreductase
MT1795	53.8774	32.363	35.3761	21.3296	-0.60411	5.16323	7.90132	0.00493987105465996	0.0206997	Rv1752	Rv1752	conserved hypothetical protein
MT1796	22.5518	18.3544	22.5705	16.0886	-0.0937245290018504	4.32181	0.145245275120881	0.703121196192906	0.813571	Rv1753c	PPE24	PPE-family protein
MT1797	55.8271	46.6952	58.4144	46.0719	0.0230677107518911	5.69651	0.013568529787463	0.907268940303911	0.946949	Rv1754c	Rv1754c	conserved protein
MT1798	32.0405	23.7174	24.6755	20.0498	-0.309879145538093	4.65677	1.75699	0.185000043424744	0.334039
MT1799	54.2023	35.9229	29.5288	24.8033	-0.706215549816657	5.17853	10.272	0.00135067891061702	0.00726377	Rv1755c	plcD	partial CDS for phospholipase C
MT1801	88.3875	146.281	42.3343	59.1744	-1.18514	6.39582	39.1254	3.97435920606174e-10	9.96089e-09			sulfite oxidase
MT1802	390.465	314.892	292.13	269.362	-0.321947126706384	8.30752	3.36833	0.0664612488644076	0.158213			RND family transporter
MT1803	16.5727	13.1764	13.0394	11.0305	-0.301247945564756	3.76152	1.33222	0.248411546730531	0.409227	Rv1756c	Rv1756c	putative transposase
MT1804	14.038	11.3733	7.89383	8.65372	-0.610695627227496	3.406	4.81648	0.028188844507326	0.0802949	Rv1757c	Rv1757c	putative transposase for insertion sequence element IS6110
MT1808	14.6879	14.7483	9.29718	12.554	-0.441694486711869	3.69374	2.68317	0.101413609840659	0.216926
MT1809	101.061	155.758	237.984	293.069	1.07266	7.62263	37.8449	7.65970928346185e-10	1.84994e-08	Rv1760	Rv1760	Possible triacylglycerol synthase (diacylglycerol acyltransferase)
MT1810	24.1766	13.8698	16.5478	11.3961	-0.417576104381233	4.05236	2.62925	0.104911363708202	0.222497	Rv1761c	Rv1761c	Possible exported protein
MT1811	57.8418	51.8732	45.1995	42.1717	-0.327181882714761	5.62598	2.81382	0.0934558185747733	0.203977	Rv1762c	Rv1762c	hypothetical protein
MT1812	39.3194	34.6284	32.2185	32.2382	-0.194983822312103	5.11733	0.813090808905002	0.367208027079388	0.537394
MT1813	41.3991	22.8852	35.8439	27.9113	0.0367900260118258	5.00445	0.0257946195287246	0.872402914105087	0.926589
MT1814	94.8216	154.926	128.582	175.451	0.308289370174278	7.1145	3.21714	0.0728708384874095	0.16972
MT1816	42.8289	47.7585	75.5469	73.3129	0.717761281202364	5.90616	13.9137	0.000191400163728752	0.00137663	Rv1766	Rv1766	conserved hypothetical protein
MT1817	45.5586	42.2106	102.678	104.942	1.24333	6.20832	43.7461	3.73862226475257e-11	1.07183e-09	Rv1767	Rv1767	conserved protein
MT1820	118.478	143.553	127.822	142.543	0.0493750082314031	7.05766	0.0857530937632447	0.769647286802272	0.859598	Rv1769	Rv1769	hypothetical protein
MT1820.1	188.733	274.854	245.82	257.723	0.143521539919094	7.91833	0.626054057271006	0.428806416663966	0.597063	Rv1770	Rv1770	T-cell antigen
MT1821	259.703	218.311	242.838	212.382	-0.0683015217160651	7.86676	0.170331093270448	0.679817722132089	0.796522	Rv1771	Rv1771	L-gulono-1,4-lactone dehydrogenase
MT1821.1	13.7131	25.6592	7.01674	10.6039	-1.1263	3.84911	17.2559	3.26677865821605e-05	0.000292967
MT1823	84.2931	156.591	40.3463	71.2409	-1.10009	6.46404	34.67	3.90602468852382e-09	8.50574e-08	Rv1773c	Rv1773c	transcriptional regulator (IclR family)
MT1824	93.9767	125.291	81.862	93.2408	-0.313337826606664	6.62534	2.94317	0.0862411097715585	0.192743	Rv1774	Rv1774	putative oxidoreductase with FAD-binding site
MT1825	74.0895	94.6386	62.6244	69.5954	-0.343641681898567	6.23587	3.44655	0.063383867507532	0.151794	Rv1775	Rv1775	conserved hypothetical protein
MT1826	19.2373	24.827	22.6875	25.5955	0.139459899482699	4.53658	0.333275271073601	0.563736824759167	0.708225	Rv1776c	Rv1776c	putative transcriptional regulator
MT1827	9.2287	9.06163	10.6421	10.7867	0.228621246546403	3.32761	0.717047112682814	0.397114221159193	0.566791	Rv1777	cyp144	probable cytochrome p450
MT1828	105.805	83.4965	85.8381	58.0165	-0.412929918478379	6.38193	4.89413	0.026948203457656	0.0775369	Rv1778c	Rv1778c	hypothetical protein
MT1829	549.432	562.145	480.705	457.124	-0.245590785118239	9.00132	1.9527	0.162296	0.304066	Rv1779c	Rv1779c	possible integral membrane protein
MT1830	158.968	131.163	111.449	109.634	-0.385424796834727	6.99901	4.94275	0.0262002552403576	0.0762102	Rv1780	Rv1780	conservedprotein
MT1831	85.4629	68.9794	79.5815	71.1799	-0.0288169261300279	6.25561	0.0247240197237062	0.875056702011011	0.926589	Rv1781c	malQ	probable 4-[alpha]-glucanotransferase
MT1832	564.12	813.698	963.106	927.777	0.480254251583793	9.67472	6.37917	0.0115467617052687	0.0406124	Rv1782	eccB5	ESX typeV secretion system
MT1833	1917.55	1502.29	2329.91	1742.51	0.247507978217938	10.8713	2.59291	0.107343170977728	0.22621	Rv1783	eccC5	ESX typeV secretion system
MT1834	79.1588	68.517	72.6818	65.2686	-0.0965993922243688	6.16018	0.269687	0.603541580032024	0.742777	Rv1785c	cyp143	Probable member of the cytochrome P450
MT1835	42.0491	40.9161	46.252	48.3268	0.189032322693394	5.47558	0.839463758352228	0.359550181232253	0.529689	Rv1786	Rv1786	Probable ferredoxin
MT1836	36.9148	47.1112	40.814	34.493	-0.153742337909679	5.32054	0.452446	0.501175690551281	0.65979	Rv1787	PPE25	PPE-family protein
MT1837	14.8179	14.1935	18.2435	12.6759	0.0692174953541324	3.91602	0.0668356371123302	0.796001068580408	0.875535	Rv1788	PE18	PE-family protein
MT1838	367.523	536.948	505.907	538.908	0.232825379580591	8.9291	1.54411	0.214007	0.369985	Rv1789	PPE26	PPE-family protein
MT1838.1	19.6922	22.3767	29.178	22.6094	0.28978	4.5595	1.30669	0.252994461956866	0.415061
MT1839	66.8106	77.3013	50.8129	39.9778	-0.673021341779793	5.87916	10.3209	0.00131534205946799	0.00713148	Rv1790	PPE27	PPE-family protein
MT1840	256.779	292.238	245.644	234.991	-0.189401009033446	8.00863	1.21002	0.271328493335323	0.437364	Rv1791	PE19	PE-family protein
MT1842	353.68	310.916	367.093	294.531	-0.012184090526047	8.37358	0.00493236467005431	0.944009963379313	0.965327	Rv1793	esxN	putative ESAT-6 like protein
MT1843	448.437	347.763	571.104	421.839	0.313730879433029	8.80538	3.23968	0.0718746	0.167988	Rv1794	Rv1794	conserved protein
MT1844	732.901	501.21	883.817	580.836	0.241440211832987	9.39829	1.95735	0.161797	0.303961	Rv1795	eccD5	ESX typeV secretion system
MT1845	980.776	610.782	1034.33	702.536	0.139257767788141	9.70078	0.687221879841843	0.407110932814924	0.575501	Rv1796	mycP5	ESX typeV secretion system
MT1846	400.993	339.118	514.152	394.841	0.289064358554469	8.68783	2.76649	0.0962572289919597	0.20847	Rv1797	eccE5	ESX typeV secretion system
MT1847	328.789	222.426	323.355	230.116	0.0124331633430052	8.10993	0.00541916310564261	0.941316762919102	0.963067	Rv1798	eccA5	ESX typeV secretion system
MT1848	112.044	93.9451	79.2892	69.047	-0.471541377213839	6.47074	6.55966	0.0104316414037832	0.0377635	Rv1799	lppT	probable lipoprotein
MT1849	179.375	150.257	142.849	129.501	-0.271468547399837	7.23462	2.60181	0.106742059005511	0.225495	Rv1800	PPE28	PPE-family protein
MT1850	20.2771	32.178	135.54	180.57	2.6108	6.52714	176.833	2.3824104743184e-40	4.99679e-38	Rv1801	PPE29	PPE-family protein
MT1851	22.3568	20.4349	26.1958	50.7035	0.775809013520311	4.90771	7.57562	0.00591630223707358	0.0240576	Rv1802	PPE30	PPE-family protein
MT1853	26.4513	41.7945	37.1303	38.8199	0.187428238554664	5.17709	0.649874825178273	0.420157436364622	0.588102	Rv1803c	PE_PGRS32	PE_PGRS-family protein
MT1854	26.5163	26.7226	27.1899	35.6509	0.228114463417838	4.86437	0.963769016292369	0.326239100158748	0.497536	Rv1804c	Rv1804c	conserved hypothetical protein
MT1855	57.8418	22.0993	15.8461	14.0166	-1.26818	4.78263	17.7158	2.56489913811876e-05	0.000234429	Rv1806	PE20	PE-family protein
MT1856	53.2925	54.5547	38.709	30.2271	-0.656170037800791	5.4699	9.24614	0.00235992563995442	0.0113992	Rv1807	PPE31	PPE-family protein
MT1856.1	50.6928	52.5667	57.2449	49.6675	0.0464336155257331	5.71859	0.053098149779494	0.817757373689352	0.889242	Rv1808	PPE32	PPE-family protein
MT1857	180.025	190.664	225.062	193.795	0.172633283200885	7.62571	1.02807	0.310612556173627	0.47995	Rv1809	PPE33	PPE-family protein
MT1858	415.161	310.823	423.87	326.16	0.0497017919795304	8.52789	0.0822110503287519	0.774323127800751	0.862472	Rv1810	Rv1810	conserved protein
MT1859	124.717	93.2978	96.3048	86.9029	-0.237838540307007	6.64974	1.67391	0.195735350848902	0.347018	Rv1811	mgtC	probable magnesium transport ATPase protein C
MT1860	183.339	189.37	244.533	263.756	0.446812351571396	7.7837	7.1795	0.00737412790647786	0.0283648	Rv1812c	Rv1812c	probable dehydrogenase
MT1861	92.9369	219.421	524.794	829.356	2.20571	8.70295	116.934	2.96840107590703e-27	2.46439e-25	Rv1813c	Rv1813c	conserved hypothetical protein
MT1862	104.245	103.515	147.585	173.135	0.622246808440318	7.04684	13.0296	0.000306607401850905	0.00206042	Rv1814	erg3	membrane bound C-5 sterol desaturase
MT1863	130.502	240.318	160.157	295.628	0.297133457480891	7.69196	3.20608	0.0733650334489171	0.170472	Rv1815	Rv1815	conserved hypothetical protein
MT1864	69.1502	85.1146	64.9633	91.4735	0.0078492796927739	6.28162	0.00179757925523916	0.966181527495902	0.981037	Rv1816	Rv1816	putative transcriptional regulator involved in mmpL protein
MT1865	25.9313	61.351	38.4167	87.5733	0.539214315784049	5.74009	7.39736	0.00653196113223479	0.025926	Rv1817	Rv1817	possible flavoprotein
MT1866	153.053	286.135	231.552	315.739	0.368491999561973	7.94692	4.11217	0.0425757	0.111686	Rv1818c	PE_PGRS33	PE_PGRS-family protein
MT1867	188.018	110.959	141.212	106.648	-0.235770237910712	7.09594	1.80514	0.179092	0.326032	Rv1819c	bacA	probable multidrug resistance pump
MT1868	145.969	212.024	180.447	220.426	0.180353407011545	7.56866	1.14325	0.284966655582218	0.451867	Rv1820	ilvG	acetolactate synthase II
MT1869	1166.72	1036.03	1628.12	1567.54	0.539101512649571	10.3984	11.1101	0.00085859671469597	0.00495537	Rv1821	secA2	SecA, preprotein translocase subunit
MT1870	77.664	48.0821	65.5481	51.3129	-0.0764081229599006	5.92471	0.153337738811146	0.695365885705535	0.809297	Rv1822	pgsA2	CDP-diacylglycerol-glycerol-3-phosphate
MT1871	118.218	86.8252	102.327	89.4015	-0.0832137187508068	6.63364	0.206365957619902	0.649631	0.778835	Rv1823	Rv1823	conserved hypothetical protein
MT1872	49.588	33.6113	34.499	27.4847	-0.407569395801556	5.18571	3.57057	0.0588122056405126	0.143479	Rv1824	Rv1824	Conserved hypothetical membrane protein
MT1873	149.024	87.8424	104.257	71.8503	-0.403323053058619	6.69122	5.03437	0.0248490758095989	0.0734596	Rv1825	Rv1825	hypothetical protein
MT1874	328.983	234.909	211.145	189.102	-0.476466993642133	7.91371	7.5336	0.00605589044873021	0.0244506	Rv1826	gcvH	glycine cleavage system H protein
MT1875	741.415	928.91	884.636	1104.81	0.252492	9.83772	2.31579	0.128066557700446	0.256197	Rv1827	garA	conserved protein with FHA domain
MT1876	643.669	478.001	528.244	516.603	-0.0865435912588612	9.08143	0.217420577570692	0.641012376478666	0.772199	Rv1828	Rv1828	conserved protein
MT1877	377.467	391.453	540.932	605.883	0.574697512174731	8.904	10.6754	0.0010857224716051	0.00602591	Rv1829	cor	probable carbon monoxide resistant gene
MT1879	649.258	493.813	568.005	585.345	0.0262337707258311	9.16542	0.0200391274538561	0.887427860200121	0.934916	Rv1830	Rv1830	conserved protein
MT1880	978.372	1435.34	1753.78	2947.81	0.940219712304946	10.7968	35.1648	3.02949358258417e-09	6.85939e-08	Rv1832	gcvB	glycine decarboxylase
MT1881	50.1729	73.0016	66.3082	87.5733	0.331475660544461	6.11658	3.23433	0.0721096458015602	0.168439	Rv1833c	Rv1833c	Possible haloalkane dehalogenase
MT1882	26.2563	35.1369	29.178	45.5844	0.266035781251983	5.09412	1.46777	0.225698007367759	0.382889	Rv1834	lipZ	probable hydrolase
MT1884	827.528	696.451	686.237	556.946	-0.296282925399477	9.43442	3.01088	0.082707427260986	0.187267	Rv1836c	Rv1836c	conserved hypothetical protein
MT1885	1666.17	1482.64	1550.35	1980.18	0.156815253222458	10.7056	0.803479239537637	0.370055165700426	0.540766	Rv1837c	glcB	malate synthase
MT1886	61.4813	42.9041	53.3272	53.3849	0.0548099994192344	5.72441	0.0659629623924616	0.797308035929936	0.876247	Rv1838c	vapC13	possible toxin
MT1887	32.1705	37.3561	32.5694	39.9168	0.0571711340298675	5.15466	0.0714667570810033	0.789213	0.871436	Rv1839c	vapB13	possible anti toxin
MT1888	8.31882	32.3167	22.1612	34.493	0.728165743935233	4.61297	5.31764	0.0211105543970349	0.0649117	Rv1840c	PE_PGRS34	PE_PGRS-family protein
MT1889	90.6622	72.5855	92.7379	88.1827	0.156757782011544	6.42868	0.708136952952849	0.400062992992302	0.569172	Rv1841c	Rv1841c	Conserved hypothetical membrane protein
MT1890	133.881	127.233	183.312	184.958	0.496607495951461	7.29875	8.80045	0.00301156500978027	0.01402	Rv1842c	Rv1842c	Conserved hypothetical membrane protein
MT1891	325.539	380.311	556.077	559.506	0.664566131454641	8.83121	14.1499	0.000168808472482929	0.00124806	Rv1843c	guaB1	inosine-5'-monophosphate dehydrogenase
MT1892	258.533	278.738	373.349	372.293	0.473765614801225	8.3257	7.38065	0.00659294792965377	0.0260462	Rv1844c	gnd1	probable 6-phosphogluconate dehdrogenase
MT1893	153.118	326.311	380.19	425.068	0.845284093870575	8.32777	14.0678	0.000176336361366272	0.00128936	Rv1845c	blaR	possible sensor-transducer protein
MT1894	429.069	600.796	862.358	952.275	0.835559987225749	9.47419	21.6649	3.24678617826646e-06	3.77535e-05	Rv1846c	blaI	transcriptional repressor
MT1895	164.947	115.767	105.368	101.834	-0.415922	6.93168	4.94911	0.026104154508788	0.0759862	Rv1847	Rv1847	putative esterase
MT1896	24.1766	21.5445	19.9392	19.1966	-0.222013485056849	4.4145	0.829018782201713	0.362556411874893	0.532265	Rv1848	ureA	urease gamma subunit
MT1897	11.8283	7.58218	6.72438	7.55677	-0.409685912882225	3.09098	1.83098	0.176012132977608	0.322269	Rv1849	ureB	urease [beta] subunit
MT1898	99.111	73.8338	71.8047	55.7007	-0.435848349012449	6.233	5.671	0.0172476493043604	0.0557436	Rv1850	ureC	urease [alpha] subunit
MT1899	11.0484	14.2859	13.0979	11.3352	-0.0475653309633025	3.65167	0.0296426320604475	0.863303601022229	0.919611	Rv1851	ureF	urease accessory protein
MT1900	23.1367	23.9486	33.7973	32.2382	0.487223953896762	4.82724	4.60473	0.031883804046283	0.0889904	Rv1852	ureG	urease accessory protein
MT1901	56.672	51.6883	63.2676	55.7617	0.134088180929086	5.83177	0.486273718782675	0.485594238545463	0.646756	Rv1853	ureD	probable urease accessory protein
MT1902	1411.47	1668.73	1735.18	2227.24	0.357227305435428	10.782	5.27041	0.0216909485515415	0.0660844	Rv1854c	ndh	probable NADH dehydrogenase
MT1903	351.795	379.479	375.045	553.716	0.319084273583439	8.69738	2.9285	0.0870285252942338	0.193534	Rv1855c	Rv1855c	possible oxidoreductase
MT1904	367.068	316.787	178.459	182.581	-0.917629415255176	8.02979	28.0413	1.18751769085068e-07	1.88536e-06	Rv1856c	Rv1856c	possible oxidoreductase
MT1905	253.789	132.734	105.777	85.5622	-0.949092649520348	7.17547	23.301	1.38526176183433e-06	1.74141e-05	Rv1857	modA	molybdate binding protein
MT1906	23.8516	11.7894	12.981	9.81162	-0.577183549099691	3.87732	4.3107	0.0378734205900086	0.102115	Rv1858	modB	transport system permease, molybdate uptake
MT1907	139.145	157.192	116.712	131.451	-0.255814063048501	7.09009	2.34469	0.125710383571131	0.252498	Rv1859	modC	molybdate uptake ABC-transporter
MT1908	271.142	219.513	146.533	114.692	-0.912096260709436	7.55523	29.7513	4.91164537738783e-08	8.36449e-07	Rv1860	apa	alanine and proline rich secreted protein
MT1909	8.44881	7.72088	9.18024	8.89749	0.162426275864512	3.11601	0.345705774215919	0.556554	0.703415
MT1910	15.4028	39.3441	44.3224	42.7811	0.810907242949043	5.15372	6.97007	0.00828842303096379	0.0313075	Rv1861	Rv1861	Probable conserved transmembrane protein
MT1911	102.88	157.099	241.727	239.684	0.919436727957366	7.53498	22.7425	1.85227030170174e-06	2.2642e-05	Rv1862	adhA	alcohol dehydrogenase (Zn)
MT1912	391.44	312.118	326.512	283.196	-0.200987189003881	8.35941	1.34308	0.246491533680911	0.407242	Rv1863c	Rv1863c	Probable conserved integral membrane protein
MT1913	38.9945	41.702	45.141	53.4459	0.285157581001046	5.48967	1.895	0.168639334763008	0.312372	Rv1864c	Rv1864c	conserved hypothetical protein
MT1914	51.7327	46.8801	41.4573	45.0969	-0.187133072465502	5.53613	0.836471	0.360408	0.530467	Rv1865c	Rv1865c	Short-chain alcohol dehydrogenase
MT1915	143.305	101.019	96.7141	89.0968	-0.374454505376867	6.75	4.12288	0.042307057176419	0.11121	Rv1866	Rv1866	conserved hypothetical protein
MT1916	8.64378	10.6798	9.94038	12.3102	0.203216707209617	3.39387	0.572510408558543	0.449263	0.613962
MT1917	111.914	125.753	162.438	156.742	0.427260442764338	7.1223	6.24328	0.0124665364515545	0.0431617	Rv1868	Rv1868	conserved hypothetical protein
MT1918	396.054	476.476	390.774	631.234	0.193587803222574	8.88798	1.0817	0.298317142897042	0.466843	Rv1869c	Rv1869c	probable reductase (like rhodocoxin reductase)
MT1919	145.254	106.428	144.136	123.834	0.103529453707677	7.0225	0.361604832605188	0.547616	0.696113	Rv1870c	Rv1870c	hypothetical protein
MT1920	1001.05	672.133	778.449	595.34	-0.268988904408772	9.57335	2.48026	0.115283470953875	0.237664	Rv1871c	Rv1871c	hypothetical protein
MT1921	2211.18	2002.62	1907.33	1762.19	-0.198891554836719	10.9447	1.6953	0.192904	0.343947	Rv1872c	lldD2	L-lactate dehydrogenase
MT1922	65.3808	53.5838	50.4036	47.4127	-0.275890296641744	5.76296	1.95374	0.162184916679649	0.30401	Rv1873	Rv1873	hypothetical protein
MT1923	32.0405	51.7808	163.607	202.509	2.15625	6.81479	125.456	4.04416745151109e-29	3.93073e-27	Rv1874	Rv1874	unknown protein
MT1924	80.9136	109.479	689.278	802.785	2.98169	8.71664	248.033	6.96959351485661e-56	3.08598e-53	Rv1875	Rv1875	hypothetical protein
MT1924.1	320.795	399.868	170.448	278.991	-0.715126	8.19308	15.4673	8.39434260927474e-05	0.000673068
MT1925	171.901	132.873	173.489	178.925	0.221359253021778	7.36103	1.50089	0.220535015003276	0.377343	Rv1876	bfrA	bacterioferritin
MT1926	287.584	253.171	225.647	205.495	-0.325449848648015	7.92532	3.78708	0.0516496437326944	0.129286	Rv1877	Rv1877	probable efflux pump
MT1927	50.8878	36.2465	39.5861	35.2853	-0.200970424325658	5.34348	0.864277943826565	0.352544	0.522264	Rv1878	glnA3	probable glutamine synthase
MT1928	37.9546	25.3818	24.2662	19.0138	-0.531900202598674	4.74174	5.23437	0.0221448411442446	0.0670571	Rv1879	Rv1879	conserved hypothetical protein
MT1929	344.776	332.229	441.938	473.03	0.434027006979522	8.63698	6.08359	0.0136443128290791	0.0464592	Rv1880c	cyp140	probable cytchrome P450
MT1930	54.1373	61.8595	57.6542	53.6897	-0.057428452499247	5.83178	0.0845368819982042	0.771240792629157	0.860654	Rv1881c	lppE	possible conserved lipoprotein
MT1931	81.4335	80.2602	62.5075	67.2797	-0.317775836759352	6.18957	2.9732	0.0846544353517529	0.190808	Rv1882c	Rv1882c	Probable short-chain type dehydrogenase/reductase
MT1931.1	203.941	226.171	139.984	180.266	-0.434690921356589	7.55239	6.60296	0.0101809189936226	0.037085	Rv1883c	Rv1883c	conserved hypothetical protein
MT1932	229.288	343.325	143.317	265.279	-0.524123437841529	7.93923	9.06581	0.00260433761227704	0.0124291	Rv1884c	rpfC	probable resuscitation promoting factor
MT1933	526.036	262.001	95.5446	52.6536	-2.38862	7.87128	182.877	1.14081750091243e-41	2.67421e-39	Rv1885c	Rv1885c	Chorismate mutase
MT1934	1224.1	972.877	263.888	190.626	-2.28247	9.37286	157.08	4.9155982974454e-36	7.25506e-34	Rv1886c	fbpB	antigen 85B, mycolyltransferase
MT1935	1013.08	925.442	828.209	665.24	-0.383457071826652	9.74501	5.14199	0.0233539100933621	0.0699545	Rv1887	Rv1887	hypothetical protein
MT1936	174.24	241.15	178.401	316.409	0.213928939858025	7.8308	1.51803	0.217918252107452	0.374151	Rv1888c	Rv1888c	hypothetical protein
MT1937	54.4623	38.0034	52.8595	42.903	0.0654454653955193	5.55934	0.104674729634258	0.746290300346776	0.840381	Rv1889c	Rv1889c	conserved hypothetical protein
MT1940	16.0527	20.3887	17.4834	19.6232	0.0324280355214663	4.21022	0.0172069292077346	0.895636725673617	0.940478	Rv1890c	Rv1890c	hypothetical protein
MT1941	136.091	204.673	178.576	246.448	0.329566964150754	7.58173	3.92594	0.0475466142316643	0.121613	Rv1891	Rv1891	hypothetical protein
MT1942	73.0497	74.4811	74.1436	89.2187	0.141616389992267	6.28233	0.577326577429858	0.447362129245707	0.612651	Rv1892	Rv1892	probable membrane protein
MT1943	71.4249	84.8835	79.5231	112.498	0.281674	6.4462	2.26874	0.132007513768486	0.261872	Rv1893	Rv1893	conserved hypothetical protein
MT1944	106.13	319.376	216.116	753.179	1.13298	8.44633	40.1575	2.34295398260554e-10	6.1024e-09	Rv1894c	Rv1894c	Hypoxia-Induced Nitronate Monooxygenase
MT1945	8.05886	9.61643	9.88191	12.0055	0.307324376812344	3.32272	1.29256	0.255577392978748	0.417751
MT1946	52.3826	67.315	52.3917	71.1799	0.0408776357178654	5.92931	0.0476299477175098	0.827239889209832	0.893915	Rv1895	Rv1895	Possible dehydrogenase
MT1947	97.5512	78.2722	88.7618	83.7339	-0.0194421933023834	6.44599	0.0109039779500648	0.916834373959384	0.951583	Rv1896c	Rv1896c	probable S-adenosyl-L-methionine-dependent methyltransferase
MT1948	43.4789	38.8818	44.4978	50.9473	0.212499423334401	5.47756	0.996184949226357	0.318235	0.48964	Rv1897c	Rv1897c	conserved hypothetical protein
MT1949	79.4838	146.188	113.086	179.169	0.399782873425739	7.01804	5.38068	0.0203609154681758	0.0631352	Rv1898	Rv1898	conserved hypothetical protein
MT1950	463.32	691.782	793.594	880.973	0.562319101078317	9.46666	9.41459	0.00215265503179442	0.0106431	Rv1899c	lppD	lipoprotein
MT1951	265.098	268.936	236.464	309.645	0.0195956510745262	8.0776	0.0120134673396706	0.912721880588681	0.949164	Rv1900c	lipJ	probable esterase
MT1952	231.042	172.633	180.564	152.72	-0.266327345309089	7.52625	2.53924	0.111047962953511	0.23181	Rv1901	cinA	competence damage protein
MT1953	79.4188	55.4794	53.912	47.9611	-0.384908747982021	5.88981	3.80697	0.0510397568628311	0.128262	Rv1902c	nanT	probable sialic acid transport integral membran protein
MT1954	52.7725	40.7774	40.4632	32.2991	-0.359756520183152	5.38144	2.88363	0.0894840217254592	0.197622	Rv1903	Rv1903	Probable conserved membrane protein
MT1955	357.19	258.904	207.111	195.074	-0.597398388426342	7.99251	11.3094	0.000771166799228754	0.00451263	Rv1904	Rv1904	conserved hypothetical protein
MT1956	113.084	173.697	129.693	143.396	-0.0406689931202098	7.13033	0.0493574988566934	0.824185068466484	0.892979	Rv1905c	aao	D-amino acid oxidase
MT1957	150.194	255.113	190.446	254.675	0.169085932550035	7.73295	0.938141	0.332756363536549	0.504225	Rv1906c	Rv1906c	conserved hypothetical protein
MT1958	40.2943	56.2653	88.0016	122.554	1.12488	6.26461	37.1452	1.09652897927606e-09	2.61657e-08	Rv1907c	Rv1907c	hypothetical protein
MT1959	635.155	1420.41	1811.55	3626.09	1.43192	10.8715	81.701	1.58314924989912e-19	9.41619e-18	Rv1908c	katG	catalase-peroxidase
MT1960	76.6892	221.409	229.681	571.146	1.47332	8.10246	69.4623	7.7888420454671e-17	3.65159e-15	Rv1909c	furA	ferric uptake regulation protein
MT1961	86.2428	75.6369	97.7081	109.634	0.358264056051298	6.52994	3.66449	0.0555837261984405	0.137068	Rv1910c	Rv1910c	probable exported protein
MT1962	279.59	324.832	353.293	373.085	0.268565461021451	8.37858	2.38535	0.122477505837803	0.247879	Rv1911c	lppC	lipoprotein
MT1963	141.03	162.37	132.909	185.933	0.0556812955215173	7.28241	0.105031660649871	0.745873013105845	0.840346	Rv1912c	fadB5	3-hydroxyacyl-CoA dehydrogenase
MT1964	77.3391	71.291	57.5958	74.4708	-0.179862197783642	6.13514	0.818866951782375	0.365511650872725	0.535698	Rv1913	Rv1913	conserved hypothetical protein
MT1965	73.0497	76.1455	60.344	69.5954	-0.202272246567802	6.12724	1.20787	0.271755362952128	0.437364	Rv1914c	Rv1914c	hypothetical protein
MT1966	803.026	1039.27	1078.59	1424.76	0.440398316056882	10.0855	7.14758	0.00750650571577191	0.0287353	Rv1915	aceAa	isocitrate lyase, [alpha] module
MT1968	35.8749	32.7791	32.6278	28.6426	-0.165726385926942	5.0265	0.583731889979118	0.444853245714871	0.61188	Rv1917c	PPE34	PPE-family protein
MT1969	167.416	119.234	96.3633	87.9389	-0.618255064077825	6.88071	11.384	0.000740787201456993	0.00435502	Rv1918c	PPE35	PPE-family protein
MT1970	112.629	101.62	79.6985	74.0442	-0.477790199067002	6.52533	6.99706	0.00816438148785903	0.0308682	Rv1919c	Rv1919c	Conserved protein
MT1971	102.75	100.233	102.211	119.75	0.125027852446759	6.73262	0.482559565452556	0.487265220452842	0.648248	Rv1920	Rv1920	probable membrane protein
MT1972	39.5794	33.8424	37.598	30.1662	-0.119873033006293	5.1459	0.313777149115221	0.575371572064188	0.717863	Rv1921c	lppF	lipoprotein
MT1973	193.738	210.591	215.589	252.847	0.209147263489186	7.7702	1.56841	0.210438	0.365759	Rv1922	Rv1922	Probable conserved lipoprotein
MT1974	341.267	264.452	222.665	222.376	-0.432984734710266	8.0378	5.95763	0.0146537287467575	0.0488253	Rv1923	lipD	probable esterase
MT1975	157.863	122.378	90.9253	95.13	-0.579495144009225	6.86643	9.62748	0.00191687105664825	0.00966928	Rv1924c	Rv1924c	unknown protein
MT1976	3394.73	4351.39	3693.96	4942.25	0.152793794427126	11.9999	1.34452	0.246237937464376	0.406992	Rv1925	fadD31	acyl-CoA synthase
MT1977	186.069	203.702	211.555	250.288	0.241316621077473	7.73482	2.0844	0.148810297783655	0.286894	Rv1926c	mpt63	immunogenic protein
MT1979	59.7915	69.2568	63.2676	93.5455	0.259288884142937	6.16145	1.78954	0.180981641277334	0.32864	Rv1927	Rv1927	conserved hypothetical protein
MT1980.2	8.83875	7.76711	11.3437	10.6039	0.404509631184425	3.28427	2.20826	0.137273603733256	0.270684	Rv1930c	Rv1930c	conserved hypothetical protein
MT1981	18.9123	23.0239	23.2722	21.0249	0.082250560160082	4.43828	0.106666675844664	0.743971	0.839866	Rv1931c	Rv1931c	probable transcriptional regulator (AraC family)
MT1982	509.723	404.214	417.847	397.218	-0.155960363789723	8.75607	0.774762118494309	0.378747872607699	0.55004	Rv1932	tpx	thiol peroxidase
MT1984	5.71919	5.40924	7.30911	5.30193	0.163070240720607	2.59591	0.299488789956677	0.584203081139407	0.725778	Rv1934c	fadE17	acyl-CoA dehydrogenase
MT1985	12.8682	13.5462	19.6469	17.9169	0.505751782982368	4.00932	3.85558	0.0495807936894559	0.125368	Rv1935c	echA13	enoyl-CoA hydratase/isomerase superfamily
MT1986	37.3047	43.9212	37.0718	59.2963	0.214996344883856	5.47613	0.979819912127535	0.322243270999692	0.493656	Rv1936	Rv1936	Possible monooxygenase
MT1987	57.0619	47.851	48.7664	52.8974	-0.0404889227116917	5.69347	0.0388719133296007	0.843702633735116	0.905997	Rv1937	Rv1937	Possible oxygenase
MT1988	19.9522	17.2448	21.518	15.4792	-0.0226889180288289	4.22169	0.00835784014001462	0.927157898302317	0.955697	Rv1938	ephB	probable epoxide hydrolase
MT1989	6.69405	5.87157	5.43797	5.60664	-0.181806686948401	2.58801	0.386435101476192	0.534179241296508	0.686457	Rv1939	Rv1939	Probable oxidoreductase
MT1990	9.81361	11.5582	14.8521	10.1163	0.201401571950063	3.54895	0.479812	0.488507671638431	0.649334	Rv1940	ribA1	GTP cyclohydrolase II
MT1991	63.691	45.8167	45.0241	37.3573	-0.397813379364647	5.58722	3.94891	0.0469017305391067	0.12035	Rv1941	Rv1941	Probable short-chain type dehydrogenase/reductase
MT1992	71.5549	98.6609	84.4933	111.889	0.210364402063752	6.51998	1.34665	0.245865158859125	0.406713	Rv1942c	mazF5	possible toxin
MT1993	87.1527	102.406	80.4586	98.5428	-0.0851839445715565	6.52765	0.225817737408477	0.634642404347208	0.766738	Rv1943c	mazE5	possible antitoxin
MT1994	51.4727	45.3544	36.9548	41.7451	-0.298047407547554	5.45918	1.94013	0.163654379772103	0.305749	Rv1944c	Rv1944c	conserved protein
MT1995	56.932	83.4965	63.7354	106.282	0.256776437228023	6.28047	1.92413	0.165401575976911	0.308435	Rv1945	Rv1945	conserved hypothetical protein
MT1997	9.55365	14.6558	7.30911	7.13018	-0.718863965902047	3.29384	6.09483	0.0135577782619936	0.046336	Rv1946c	lppG	lipoprotein
MT1998	95.7965	58.3921	56.1924	51.1301	-0.481511026395659	6.03282	5.47475	0.0192931464755199	0.0608002	Rv1947	Rv1947	hypothetical protein
MT1998.1	6.17413	7.53595	8.8294	9.14126	0.393575900827979	3.00638	1.98131	0.159252484088426	0.300911	Rv1948c	Rv1948c	hypothetical protein
MT1999	14.6229	8.46061	15.7877	11.5789	0.278199	3.66716	1.09168	0.296099	0.464549	Rv1949c	Rv1949c	conserved hypothetical protein
MT2000	15.3378	13.9161	14.3843	12.6759	-0.113602725179404	3.82678	0.192928770446852	0.66049	0.786608	Rv1950c	Rv1950c	conserved hypothetical protein
MT2001	35.8099	38.4657	47.8308	45.8282	0.334582653717913	5.3956	2.48109	0.115222484921602	0.237661	Rv1951c	Rv1951c	conserved hypothetical protein
MT2002	44.2587	35.6917	32.277	33.0304	-0.283314290824187	5.1867	1.67374	0.195758099954256	0.347018	Rv1952	Rv1952	conserved hypothetical protein
MT2003	29.3109	17.9846	12.864	15.2964	-0.710079082479711	4.24489	6.05352	0.0138785889482554	0.0470291
MT2004	29.9608	24.4572	33.7973	33.9445	0.323626128183068	4.93738	2.03894	0.153316883360204	0.292749	Rv1955	Rv1955	hypothetical protein
MT2005	22.0969	12.6678	15.9631	14.9307	-0.118722	4.04488	0.183966925984244	0.667986060383734	0.789889	Rv1956	Rv1956	putative transcriptional regulator
MT2006	48.4182	28.8955	34.8498	25.9612	-0.315968979154247	5.11375	2.03644	0.153568533524985	0.292809	Rv1957	Rv1957	hypothetical protein
MT2007	22.3568	13.2688	16.5478	11.8227	-0.302445661218217	4.00843	1.36286	0.243042241046733	0.40372
MT2008	57.9718	59.6403	56.8356	78.6758	0.187260343255126	5.9862	0.912234947115412	0.339522116120337	0.509987	Rv1959c	Rv1959c	conserved hypothetical protein
MT2009	27.6211	38.3732	29.4703	51.9833	0.269381939007972	5.20871	1.52664	0.216617926573252	0.372721	Rv1960c	Rv1960c	hypothetical protein
MT2010	14.8829	12.0668	12.6301	13.7119	-0.0251077310885203	3.74709	0.0087092601096046	0.925646629403265	0.954764	Rv1961	Rv1961	hypothetical protein
MT2011	3.18455	4.90068	2.98212	3.04709	-0.405877895610283	1.87331	1.64023	0.200294378741549	0.352394
MT2012	47.1183	30.5137	33.0956	32.4819	-0.210422904685408	5.16584	0.815988	0.366355760071842	0.536541	Rv1962c	Rv1962c	conserved hypothetical protein
MT2013	63.951	55.0633	46.9537	47.5955	-0.327736342992454	5.7415	2.70207	0.100218237864257	0.2146
MT2014	45.4936	59.9177	58.4144	75.4458	0.346342846995812	5.90535	3.34867	0.0672592894927117	0.159826	Rv1963c	Rv1963c	putative transcriptional regulator
MT2015.1	9.03372	12.2979	9.23871	16.8809	0.253759116616012	3.58262	0.871282309549488	0.350600555640831	0.520351
MT2016	16.8326	32.7791	22.2197	37.9667	0.302990106031353	4.78565	1.71634	0.190165041596738	0.340336	Rv1964	Rv1964	part of mce3 operon
MT2017	10.7235	17.2911	10.6421	17.5512	0.00594844685345703	3.82606	0.000524095092016008	0.981735525813237	0.990936
MT2018	14.233	23.3938	14.2089	26.0221	0.0785309239832699	4.29233	0.103552087103484	0.747607925809316	0.841154	Rv1966	mce3	cell invasion protein
MT2019	6.56407	13.1764	6.54896	12.9196	-0.0167648961397593	3.31333	0.0037689749903668	0.951047040760104	0.969786	Rv1967	Rv1967	part of mce3 operon
MT2020	7.60393	12.0205	8.94635	10.9695	0.0441702177352933	3.32421	0.0255271	0.873060691438673	0.926589	Rv1968	mce3C	part of mce3 operon
MT2021	6.49908	10.9572	7.13369	10.7867	0.0514304689458739	3.16602	0.0344900320045105	0.852668326356473	0.912673	Rv1969	mce3D	part of mce3 operon
MT2022	6.69405	12.3442	9.35566	12.4931	0.238657089707334	3.37213	0.727706911842245	0.393627478887233	0.563436	Rv1970	lprM	part of mce3 operon
MT2023	9.94359	13.3151	9.29718	12.4931	-0.0943091237428018	3.50944	0.126539896789125	0.722046919608529	0.827106	Rv1971	mce3F	part of mce3 operon
MT2024	7.27897	7.76711	8.94635	11.6399	0.444344651945234	3.17254	2.52905	0.111767253808043	0.232946	Rv1972	Rv1972	conserved hypothetical protein
MT2024.1	2.01472	3.19006	3.80074	4.69251	0.716515135405184	1.82412	5.17606	0.0229001902807517	0.0689775	Rv1973	Rv1973	Possible conserved Mce associated membrane protein
MT2025	2.92459	3.00513	3.27448	3.04709	0.0895659869251161	1.66741	0.0807110777513312	0.776336083246058	0.863352	Rv1974	Rv1974	probable conserved membrane protein
MT2026	17.0276	10.9572	10.8759	9.87256	-0.400472325179911	3.61842	2.14245	0.143272835135125	0.278967	Rv1975	Rv1975	hypothetical protein
MT2027	3.63949	4.43835	4.79477	5.91135	0.405395928839089	2.26598	1.83061	0.176055139010473	0.322269
MT2028	12.9982	36.6164	37.3057	49.5456	0.963106326943807	5.09796	12.1298	0.00049622683063776	0.00310434	Rv1976c	Rv1976c	hypothetical protein
MT2029	67.5904	107.445	98.0005	156.194	0.537838344296044	6.74722	9.43033	0.00213425587857633	0.0105784	Rv1977	Rv1977	probable zinc metallopeptidase
MT2030	116.853	102.128	105.427	127.673	0.0874187305082404	6.82178	0.214665909403465	0.643134635440267	0.77382	Rv1978	Rv1978	similar to methyltransferases
MT2031	215.055	112.993	154.719	89.95	-0.402562657718526	7.16257	5.62061	0.0177504970198526	0.057091	Rv1979c	Rv1979c	unknown permease
MT2032	951.66	570.606	750.265	605.029	-0.129385968752212	9.49082	0.499284368712779	0.479814733223676	0.64103	Rv1980c	mpt64	secreted immunogenic protein Mpb64/Mpt64
MT2033	842.281	994.884	846.394	1354.49	0.226285518713353	9.97961	1.60431	0.205294130369322	0.359445	Rv1981c	nrdF	ribonucleotide reductase small subunit
MT2034	219.539	271.294	272.308	410.321	0.454274165453971	8.19711	6.5817	0.0103032252299273	0.0374279	Rv1982c	vapC36	possible toxin
MT2035	214.86	272.635	279.325	488.326	0.610439766348058	8.29414	10.5688	0.0011501312899781	0.00632176	Rv1982A	vapB36	possible antitoxin
MT2036	57.2569	89.4605	69.7581	87.0857	0.121251292528255	6.24832	0.410327423002585	0.521803365155551	0.676663	Rv1983	PE_PGRS35	PE_PGRS-family protein
MT2037	224.608	173.882	194.422	188.676	-0.0452032330688568	7.61102	0.0686010263151786	0.793385	0.874321	Rv1984c	cfp21	probable cutinase precursor
MT2038	114.254	91.6797	117.063	104.881	0.114526045668886	6.74244	0.415534297581132	0.519173796044044	0.674495
[truncated: 1,988 more rows]
